# Supplementary material for: Halogenated salt assisted Cu-catalyzed asymmetric 1,4-borylstannation of 1,3-enynes: enantioselective synthesis of allenylstannes
Source: Royal Society of Chemistry journal article supplement (doi:10.1039/d0sc05425a), 2020-12-22
Supplement: d0sc05425a1.pdf [file d0sc05425a1.pdf]

## Supporting Information

### General information

All the commercially available reagents were used directly without further purification. Solvents used in catalytic reactions were freshly distilled in appropriate method. Solvents employed for column chromatography were purchased in technical grade quality without distillation. All the catalytic reactions were operated in glovebox. NMR spectras were obtained on a Bruker 400 spectrometer in CDCl<sub>3</sub> operating at 400 MHz for <sup>1</sup>H NMR, 101 MHz for <sup>13</sup>CNMR, 162 MHz for <sup>31</sup>P NMR, and 376 MHz for <sup>19</sup>F NMR. The coupling constants are in Hertz (Hz). The following abbreviations are used for spin multiplicity: s = singlet, d = doublet, dd = doublet of doublet, t = triplet, tt = triplet of triplet, brs = broad singlet and m = multiplet. Optical rotation was recorded on PE polarmeter 341, and reported as [α]<sub>λ</sub><sup>T</sup> (c: g/100 mL, in solvent). Enantiomerical excesses were measured by HPLC analysis on Chiralcel OD-H, OZ-H, AS-H, IC chiral column (Daicel Chemical Industries, LTD). Electrospray ionization high-resolution mass spectra (ESI-HRMS (M/Z, ESI)) were recorded on a Waters Vion® IMS Q-ToF mass spectrometer. Liquid chromatography was performed using forced flow (flash chromatography) on silicagel (300-400 mesh). The deactivated silica gel (35 wt% H<sub>2</sub>O) was prepared by mixing silica gel and deionized water (65:35 by weight), followed by vigorous shaking and stirring. After the mixture turned to a fluffy powder, it was allowed to sit overnight prior to use.

### 1. General procedures for synthesis of Ligands

All commercially available reagents were used as received without further purification. Chiral sulfoxide phosphine ligands (**SOP**) **SOP-1**, **SOP-2**, **SOP-3**, **SOP-4**, **SOP-5**, **SOP-6** were prepared according to the literature procedure reported by our group.<sup>1</sup>

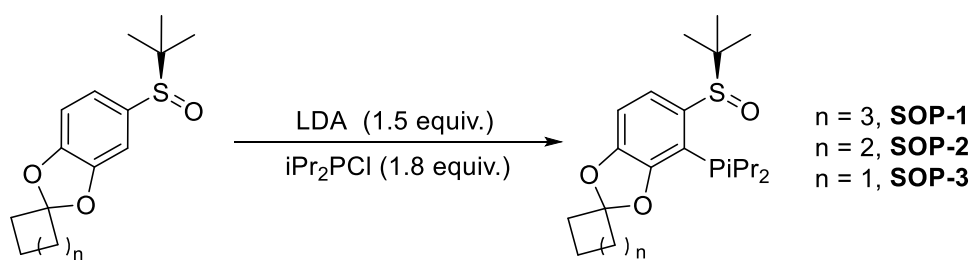

Under argon atmosphere and at -78 °C, LDA (5.1 mL, 2.0 M in hexane, 10.2 mmol) was added to a solution of (*R*)-5-(*tert*-butylsulfinyl)spiro[benzo[*d*][1,3]dioxole-2,1'-cyclohexane (2 g, 6.8 mmol) in tetrahydrofuran (10 mL), the mixture was stirred for 1 hour at -45°C, then *iPr*<sub>2</sub>PCl (1.86 g, 12.2 mmol) in THF (1 mL) was added dropwise. The mixture was warmed to room temperature and stirred overnight, then quenched with saturated NH<sub>4</sub>Cl aqueous solution (2 mL). The organic phase was separated and aqueous layer was extracted with ethyl acetate (3 x 10 mL). The combined organic layer was dried over Na<sub>2</sub>SO<sub>4</sub> and concentrated. Flash chromatography of the crude material with petroleum ether (PE)/ethyl acetate (EA) = (3/1) afforded (*R*)-(6-(*tert*-butylsulfinyl)-2, 3-dimethoxyphenyl) diphenylphosphane **SOP-1** as a white solid (1.24 g, 44% yield).

(*R*)-(5-(*tert*-butylsulfinyl)spiro[benzo[*d*][1,3]dioxole-2,1'-cyclohexan]-4-yl)diisopropylphosphane

**(SOP-1)**

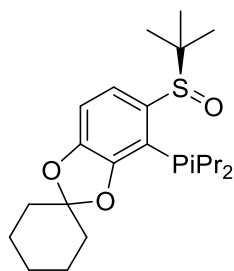

White solid,  $^1\text{H}$  NMR (400 MHz,  $\text{CDCl}_3$ )  $\delta$  = 7.44 (dd,  $J$  = 2.6, 8.2 Hz, 1H), 6.91 (d,  $J$  = 8.2 Hz, 1H), 2.97-2.88 (m, 1H), 2.18-2.10 (m, 1H), 1.99-1.76 (m, 6H), 1.74-1.69 (m, 2H), 1.64-1.58 (m, 1H), 1.53-1.44 (m, 1H), 1.28 (s, 9H), 1.23-1.15 (m, 6H), 1.03-0.98 (m, 6H);  $^{13}\text{C}$  NMR (101 MHz,  $\text{CDCl}_3$ )  $\delta$  = 150.2 (d,  $J$  = 4 Hz), 148.8, 139.6 (d,  $J$  = 23 Hz), 121.1 (d,  $J$  = 6 Hz), 119.2, 117.0 (d,  $J$  = 32 Hz), 109.2, 58.9, 35.4 (d,  $J$  = 12 Hz), 26.6 (d,  $J$  = 14 Hz), 24.4, 23.9 (d,  $J$  = 5 Hz), 23.2, 21.3 (d,  $J$  = 10 Hz), 21.0 (d,  $J$  = 13 Hz), 20.8 (d,  $J$  = 4 Hz), 20.7 (d,  $J$  = 10 Hz), 19.4 (d,  $J$  = 3 Hz);  $^{31}\text{P}$  NMR (162 MHz,  $\text{CDCl}_3$ )  $\delta$  = 0.87; HRMS (M/Z, ESI) Calcd. for  $\text{C}_{22}\text{H}_{35}\text{O}_3\text{PS}$  [M+H]: 411.2123, Found: 411.2112; Optical Rotation:  $[\alpha]_{\text{D}}^{25}$  153.8 (c 1.05,  $\text{CHCl}_3$ ).

*(R)*-5-(tert-butylsulfinyl)spiro[benzo[d][1,3]dioxole-2,1'-cyclopentan]-4-yl)diisopropylphosphane  
**(SOP-2)**

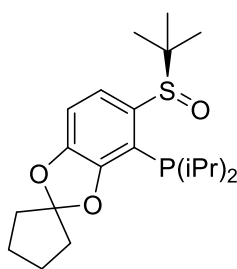

White solid,  $^1\text{H}$  NMR (400 MHz,  $\text{CDCl}_3$ )  $\delta$  = 7.45 (dd,  $J$  = 2.6, 8.2 Hz, 1H), 6.91 (d,  $J$  = 8.2 Hz, 1H), 2.95-2.86 (m, 1H), 2.16-2.04 (m, 5H), 1.88-1.86 (m, 4H), 1.28 (s, 9H), 1.22-1.14 (m, 6H), 1.02-0.97 (m, 6H);  $^{13}\text{C}$  NMR (101 MHz,  $\text{CDCl}_3$ )  $\delta$  = 150.3 (d,  $J$  = 3 Hz), 148.8, 139.7 (d,  $J$  = 12 Hz), 127.6, 121.1 (d,  $J$  = 6 Hz), 117.0 (d,  $J$  = 33 Hz), 108.9, 58.9, 37.0 (d,  $J$  = 27 Hz), 26.6 (d,  $J$  = 13 Hz), 23.8 (d,  $J$  = 5 Hz), 23.0 (d,  $J$  = 2 Hz), 21.3 (d,  $J$  = 10 Hz), 20.9 (d,  $J$  = 7 Hz), 20.8 (d,  $J$  = 6 Hz), 20.7 (d,  $J$  = 2 Hz), 19.3 (d,  $J$  = 3 Hz);  $^{31}\text{P}$  NMR (162 MHz,  $\text{CDCl}_3$ )  $\delta$  = 1.25; HRMS (M/Z, ESI) Calcd. for  $\text{C}_{21}\text{H}_{33}\text{O}_3\text{PS}$  [M+H]: 397.1966, Found: 397.1961; Optical Rotation:  $[\alpha]_{\text{D}}^{25}$  179.7 (c 0.79,  $\text{CHCl}_3$ ).

*(R)*-5-(tert-butylsulfinyl)spiro[benzo[d][1,3]dioxole-2,1'-cyclobutan]-4-yl)diisopropylphosphane  
**(SOP-3)**

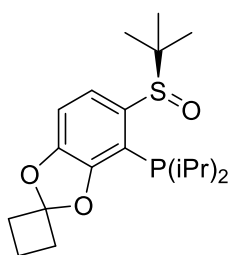

White solid,  $^1\text{H NMR}$  (400 MHz,  $\text{CDCl}_3$ )  $\delta = 7.47$  (dd,  $J = 2.6, 8.2$  Hz, 1H), 6.93 (d,  $J = 8.2$  Hz, 1H), 3.02-2.93 (m, 1H), 2.72-2.56 (m, 4H), 2.18-2.10 (m, 1H), 1.93-1.85 (m, 2H), 1.28 (s, 9H), 1.22-1.16 (m, 6H), 1.04-0.97 (m, 6H),  $^{13}\text{C NMR}$  (101 MHz,  $\text{CDCl}_3$ )  $\delta = 150.0$  (d,  $J = 3$  Hz), 148.4, 140.0 (d,  $J = 2.3$  Hz), 121.3 (d,  $J = 6.3$  Hz), 117.9, 117.0 (d,  $J = 33$  Hz), 108.9, 58.9, 37.0 (d,  $J = 35$  Hz), 26.6 (d,  $J = 14$  Hz), 23.8 (d,  $J = 4.7$  Hz), 21.2 (d,  $J = 10$  Hz), 21.0, 20.8 (d,  $J = 1.5$  Hz), 20.6 (d,  $J = 4.5$  Hz), 19.4 (d,  $J = 3$  Hz), 10.8;  $^{31}\text{P NMR}$  (162 MHz,  $\text{CDCl}_3$ )  $\delta = 1.37$ ; HRMS (M/Z, ESI) Calcd. for  $\text{C}_{21}\text{H}_{33}\text{O}_3\text{PS}$  [M+H]: 383.1804, Found: 383.1804; Optical Rotation:  $[\alpha]_{\text{D}}^{25}$  195.7 (c 0.42,  $\text{CHCl}_3$ ).

## 2. General procedures for the synthesis of substrates (1a – 1af)<sup>2</sup>

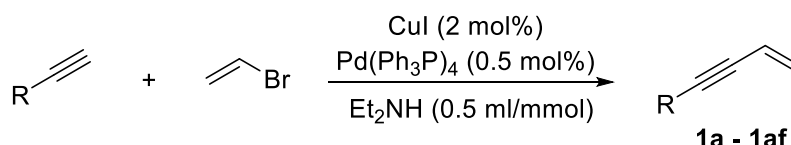

$\text{CuI}$  (2 mol%) and  $\text{Pd}(\text{PPh}_3)_4$  (0.5 mol%) were dissolved in anhydrous/degassed diethyl amine and cooled to 0 °C. The alkyne (10 mmol, 1.0 equiv.) was added into the mixture, and vinyl bromide (1 M in THF, 1.3 equiv.) was added into the mixture slowly. After addition, the mixture was warmed to room temperature and stirred for 4 hours. The reaction mixture was filtrated a celite pad, the solvent was removed under vaccum, flash chromatography of the crude product with PE/EA from 1:0 to 20:1 afforded the products.

### 1-(but-3-en-1-yn-1-yl)-4-methoxybenzene (1a)

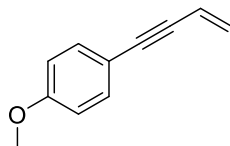

Colorless oil.  $^1\text{H NMR}$  (400 MHz,  $\text{CDCl}_3$ ):  $\delta = 7.41$  (d,  $J = 8.1$  Hz, 2H), 6.87 (d,  $J = 8.8$  Hz, 2H), 6.03 (dd,  $J = 11.2, 17.5$  Hz, 1H), 5.72 (dd,  $J = 2.0, 17.5$  Hz, 1H), 5.52 (dd,  $J = 2.0, 11.2$  Hz, 1H), 3.83 (s, 3H).

### but-3-en-1-yn-1-ylbenzene (1b)

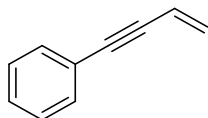

Colorless oil.  $^1\text{H NMR}$  (400 MHz,  $\text{CDCl}_3$ ):  $\delta = 7.49$ -7.47(m, 2H), 7.35-7.33(m, 3H), 6.05 (dd,  $J = 11.1, 17.5$  Hz, 1H), 5.77 (dd,  $J = 2.1, 17.5$  Hz, 1H), 5.58 (dd,  $J = 2.1, 11.1$  Hz, 1H).

### 1-(but-3-en-1-yn-1-yl)-4-methylbenzene (1c)

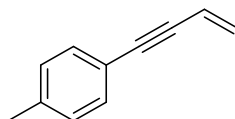

Colorless oil.  $^1\text{H NMR}$  (400 MHz,  $\text{CDCl}_3$ ):  $\delta = 7.37$  (d,  $J = 8.1$  Hz, 2H), 7.15 (d,  $J = 7.9$  Hz, 2H), 6.05 (dd,  $J = 11.1, 17.5$  Hz, 1H), 5.75 (dd,  $J = 2.1, 17.5$  Hz, 1H), 5.55 (dd,  $J = 2.1, 11.2$  Hz, 1H).

1-(but-3-en-1-yn-1-yl)-4-(tert-butyl)benzene (**1d**)

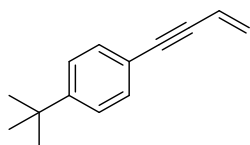

Colorless oil.  $^1\text{H NMR}$  (400 MHz,  $\text{CDCl}_3$ ):  $\delta$  = 7.48-7.35 (m, 4H), 6.04 (dd,  $J$  = 11.1, 17.5 Hz, 1H), 5.74 (dd,  $J$  = 2.1, 17.5 Hz, 1H), 5.62 (dd,  $J$  = 2.1, 11.1 Hz, 1H), 1.34 (s, 9H).

4-(but-3-en-1-yn-1-yl)-1,1'-biphenyl (**1e**)

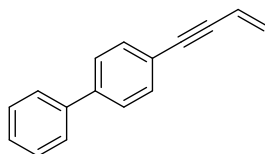

White solid.  $^1\text{H NMR}$  (400 MHz,  $\text{CDCl}_3$ ):  $\delta$  = 7.64-7.54 (m, 6H), 7.50-7.46 (m, 2H), 7.41-7.37 (m, 1H), 6.08 (dd,  $J$  = 11.2, 17.5 Hz, 1H), 5.79 (dd,  $J$  = 2.0, 17.5 Hz, 1H), 5.59 (dd,  $J$  = 2.0, 11.2 Hz, 1H).

1-(but-3-en-1-yn-1-yl)-4-fluorobenzene (**1f**)

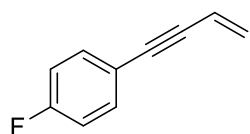

Colorless oil.  $^1\text{H NMR}$  (400 MHz,  $\text{CDCl}_3$ ):  $\delta$  = 7.46-7.43 (m, 2H), 7.06-7.01 (m, 2H), 6.03 (dd,  $J$  = 11.1, 17.5 Hz, 1H), 5.75 (dd,  $J$  = 2.0, 17.5 Hz, 1H), 5.57 (dd,  $J$  = 2.0, 11.1 Hz, 1H).

1-(but-3-en-1-yn-1-yl)-4-chlorobenzene (**1g**)

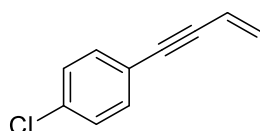

Colorless oil.  $^1\text{H NMR}$  (400 MHz,  $\text{CDCl}_3$ ):  $\delta$  = 7.40-7.38 (m, 2H), 7.33-7.30 (m, 2H), 6.03 (dd,  $J$  = 11.1, 17.5 Hz, 1H), 5.77 (dd,  $J$  = 2.0, 17.5 Hz, 1H), 5.59 (dd,  $J$  = 2.0, 11.1 Hz, 1H).

bromo-4-(but-3-en-1-yn-1-yl)benzene (**1h**)

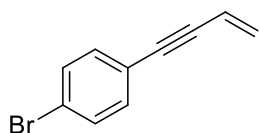

Colorless oil.  $^1\text{H NMR}$  (400 MHz,  $\text{CDCl}_3$ ):  $\delta$  = 7.47 (d,  $J$  = 8.5 Hz, 2H), 7.32 (d,  $J$  = 8.5 Hz, 2H), 6.02 (dd,  $J$  = 11.2, 17.6 Hz, 1H), 5.77 (dd,  $J$  = 2.0, 17.6 Hz, 1H), 5.59 (dd,  $J$  = 2.0, 11.2 Hz, 1H).

ethyl 4-(but-3-en-1-yn-1-yl)benzoate (**1i**)

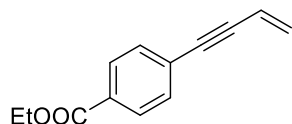

Colorless oil.  $^1\text{H NMR}$  (400 MHz,  $\text{CDCl}_3$ ):  $\delta$  = 8.01 (d,  $J$  = 8.5 Hz, 2H), 7.51 (d,  $J$  = 8.5 Hz, 2H), 6.05 (dd,  $J$  = 11.2, 17.5 Hz, 1H), 5.80 (dd,  $J$  = 2.0, 17.5 Hz, 1H), 5.62 (dd,  $J$  = 2.0, 11.2 Hz, 1H), 4.40 (q,  $J$  = 7.1 Hz, 2H), 1.41 (t,  $J$  = 7.1 Hz, 3H).

1-(but-3-en-1-yn-1-yl)-4-(trifluoromethyl)benzene (**1j**)

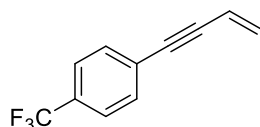

Colorless oil.  $^1\text{H NMR}$  (400 MHz,  $\text{CDCl}_3$ ):  $\delta$  = 7.61-7.55 (m, 4H), 6.05 (dd,  $J$  = 11.2, 17.5 Hz, 1H), 5.82 (dd,  $J$  = 2.0, 17.5 Hz, 1H), 5.64 (dd,  $J$  = 2.0, 11.2 Hz, 1H).

1-(but-3-en-1-yn-1-yl)-2-fluorobenzene (**1k**)

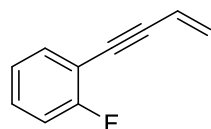

Colorless oil.  $^1\text{H NMR}$  (400 MHz,  $\text{CDCl}_3$ ):  $\delta$  = 7.48-7.44 (m, 1H), 7.33-7.28 (m, 1H), 7.14-7.07 (m, 2H), 6.08 (dd,  $J$  = 11.2, 17.5 Hz, 1H), 5.81 (dd,  $J$  = 2.0, 17.5 Hz, 1H), 5.62 (dd,  $J$  = 2.0, 11.2 Hz, 1H).

1-(but-3-en-1-yn-1-yl)-2-chlorobenzene (**1l**)

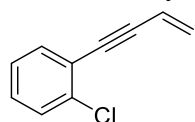

Colorless oil.  $^1\text{H NMR}$  (400 MHz,  $\text{CDCl}_3$ ):  $\delta$  = 7.51-7.49 (m, 1H), 7.43-7.41 (m, 1H), 7.29-7.23 (m, 2H), 6.10 (dd,  $J$  = 11.2, 17.5 Hz, 1H), 5.83 (dd,  $J$  = 2.0, 17.5 Hz, 1H), 5.63 (dd,  $J$  = 2.0, 11.2 Hz, 1H).

bromo-2-(but-3-en-1-yn-1-yl)benzene (**1m**)

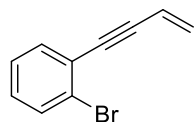

Colorless oil.  $^1\text{H NMR}$  (400 MHz,  $\text{CDCl}_3$ ):  $\delta$  = 7.62-7.60 (m, 1H), 7.51-7.48 (m, 1H), 7.30-7.26 (m, 1H), 7.20-7.16 (m, 1H), 6.09 (dd,  $J$  = 11.2, 17.6 Hz, 1H), 5.84 (dd,  $J$  = 2.1, 17.6 Hz, 1H), 5.64 (dd,  $J$  = 2.1, 11.2 Hz, 1H).

1-(but-3-en-1-yn-1-yl)-2-methoxybenzene (**1n**)

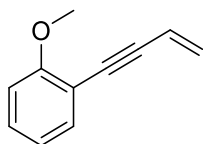

Colorless oil.  $^1\text{H NMR}$  (400 MHz,  $\text{CDCl}_3$ ):  $\delta = 7.45\text{-}7.43$  (m, 1H),  $7.33\text{-}7.28$  (m, 1H),  $6.96\text{-}6.89$  (m, 2H),  $6.10$  (dd,  $J = 11.2, 17.5$  Hz, 1H),  $5.77$  (dd,  $J = 2.1, 17.5$  Hz, 1H),  $5.56$  (dd,  $J = 2.1, 11.2$  Hz, 1H).

1-(but-3-en-1-yn-1-yl)-2-methylbenzene (**1o**)

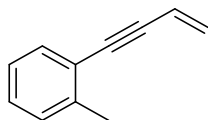

Colorless oil.  $^1\text{H NMR}$  (400 MHz,  $\text{CDCl}_3$ ):  $\delta = 7.44$  (d,  $J = 7.6$  Hz, 1H),  $7.27\text{-}7.22$  (m, 2H),  $7.19\text{-}7.14$  (m, 1H),  $6.09$  (dd,  $J = 11.1, 17.5$  Hz, 1H),  $5.76$  (dd,  $J = 2.0, 17.5$  Hz, 1H),  $5.57$  (dd,  $J = 2.1, 11.1$  Hz, 1H),  $2.48$  (s, 3H).

1-(but-3-en-1-yn-1-yl)-3-methoxybenzene (**1p**)

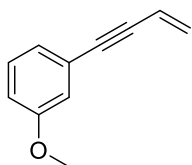

Colorless oil.  $^1\text{H NMR}$  (400 MHz,  $\text{CDCl}_3$ ):  $\delta = 7.28\text{-}7.23$  (m, 1H),  $7.08\text{-}7.06$  (m, 1H),  $7.0$  (s, 1H),  $6.91\text{-}6.89$  (m, 1H),  $6.05$  (dd,  $J = 11.2, 17.5$  Hz, 1H),  $5.77$  (dd,  $J = 2.0, 17.5$  Hz, 1H),  $5.58$  (dd,  $J = 2.0, 11.2$  Hz, 1H),  $3.83$  (s, 3H).

1-(but-3-en-1-yn-1-yl)-3-methylbenzene (**1q**)

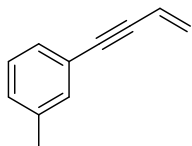

Colorless oil.  $^1\text{H NMR}$  (400 MHz,  $\text{CDCl}_3$ ):  $\delta = 7.31\text{-}7.21$  (m, 3H),  $7.16\text{-}7.14$  (m, 1H),  $6.05$  (dd,  $J = 11.1, 17.5$  Hz, 1H),  $5.76$  (dd,  $J = 2.0, 17.5$  Hz, 1H),  $5.56$  (dd,  $J = 2.0, 11.1$  Hz, 1H),  $2.36$  (s, 3H).

2-(but-3-en-1-yn-1-yl)naphthalene (**1r**)

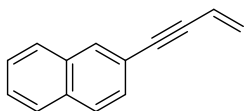

Colorless oil.  $^1\text{H NMR}$  (400 MHz,  $\text{CDCl}_3$ ):  $\delta = 8.01$  (s, 1H),  $7.85\text{-}7.80$  (m, 3H),  $7.54\text{-}7.50$  (m, 3H),  $6.11$  (dd,  $J = 11.2, 17.5$  Hz, 1H),  $5.82$  (dd,  $J = 2.0, 17.5$  Hz, 1H),  $5.61$  (dd,  $J = 2.0, 11.2$  Hz, 1H).

3-(but-3-en-1-yn-1-yl)thiophene (**1s**)

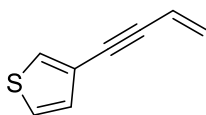

Colorless oil.  $^1\text{H NMR}$  (400 MHz,  $\text{CDCl}_3$ ):  $\delta = 7.48\text{-}7.47$  (m, 1H),  $7.30\text{-}7.28$  (m, 1H),  $7.15\text{-}7.14$  (m, 1H),  $6.02$  (dd,  $J = 11.2, 17.5$  Hz, 1H),  $5.74$  (dd,  $J = 2.0, 17.5$  Hz, 1H),  $5.56$  (dd,  $J = 2.1, 11.2$  Hz, 1H).

2-(but-3-en-1-yn-1-yl)benzo[*b*]thiophene (**1t**)

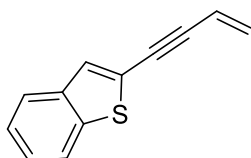

Colorless oil.  $^1\text{H NMR}$  (400 MHz,  $\text{CDCl}_3$ ):  $\delta = 7.99$  (d,  $J = 8.0$  Hz, 1H),  $7.88$  (d,  $J = 7.8$  Hz, 1H),  $7.64$  (s, 1H),  $7.50\text{-}7.41$  (m, 2H),  $6.14$  (dd,  $J = 11.2, 17.5$  Hz, 1H),  $5.85$  (dd,  $J = 2.0, 17.5$  Hz, 1H),  $5.64$  (dd,  $J = 2.0, 11.2$  Hz, 1H).

hex-5-en-3-yn-1-ylbenzene (**1u**)

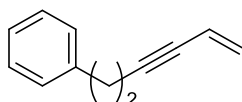

Colorless oil.  $^1\text{H NMR}$  (400 MHz,  $\text{CDCl}_3$ ):  $\delta = 7.39\text{-}7.35$  (m, 2H),  $7.31\text{-}7.29$  (m, 3H),  $5.89\text{-}5.81$  (m, 1H),  $5.65\text{-}5.60$  (m, 1H),  $5.47\text{-}5.44$  (m, 1H),  $2.94\text{-}2.90$  (m, 2H),  $2.68\text{-}2.64$  (m, 2H).

hept-6-en-4-yn-1-ylbenzene (**1v**)

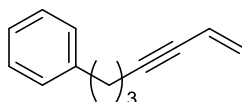

Colorless oil.  $^1\text{H NMR}$  (400 MHz,  $\text{CDCl}_3$ ):  $\delta = 7.34\text{-}7.30$  (m, 2H),  $7.24\text{-}7.21$  (m, 3H),  $5.87\text{-}5.80$  (m, 1H),  $5.63\text{-}5.58$  (m, 1H),  $5.43$  (dd,  $J = 1.9, 11.0$  Hz, 1H),  $2.77$  (t,  $J = 7.6$  Hz, 2H),  $2.37\text{-}2.34$  (m, 2H),  $1.93\text{-}1.86$  (m, 2H).

8-chlorooct-1-en-3-yne (**1w**)

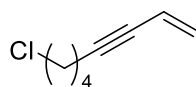

Colorless oil.  $^1\text{H NMR}$  (400 MHz,  $\text{CDCl}_3$ ):  $\delta = 5.83\text{-}5.75$  (m, 1H),  $5.58$  (dd,  $J = 2.1, 17.5$  Hz, 1H),  $5.41$  (dd,  $J = 2.1, 11.0$  Hz, 1H),  $3.60$  (t,  $J = 6.6$  Hz, 2H),  $2.40\text{-}2.36$  (m, 2H),  $1.96\text{-}1.89$  (m, 2H),  $1.75\text{-}1.68$  (m, 2H).

hept-6-en-4-yn-1-yl 4-methylbenzenesulfonate (**1x**)

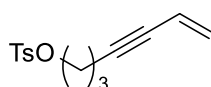

Colorless oil.  $^1\text{H NMR}$  (400 MHz,  $\text{CDCl}_3$ ):  $\delta = 7.82$  (d,  $J = 8.2$  Hz, 2H),  $7.34$  (d,  $J = 8.1$  Hz, 2H),

5.73-5.65 (m, 1H), 5.52-5.47 (m, 1H), 5.39 (dd,  $J = 2.0, 11.0$  Hz, 1H), 4.16 (t,  $J = 6.1$  Hz, 2H), 2.46 (s, 3H), 2.41-2.37 (m, 2H), 1.88 (t,  $J = 6.4$  Hz, 2H).

((pent-4-en-2-yn-1-yloxy)methyl)benzene (**1y**)

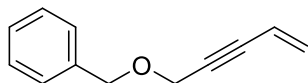

Colorless oil.  $^1\text{H NMR}$  (400 MHz,  $\text{CDCl}_3$ ):  $\delta = 7.41-7.32$  (m, 5H), 5.92-5.84 (m, 1H), 5.74-5.76 (m, 1H), 5.54 (dd,  $J = 2.2, 11.0$  Hz, 1H), 4.64 (s, 2H), 4.33-4.32 (m, 2H).

hept-6-en-4-yne nitrile (**1z**)

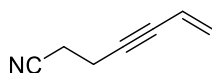

Colorless oil.  $^1\text{H NMR}$  (400 MHz,  $\text{CDCl}_3$ ):  $\delta = 5.82-5.74$  (m, 1H), 5.63 (dd,  $J = 2.2, 17.6$  Hz, 1H), 5.48 (dd,  $J = 2.2, 11.0$  Hz, 1H), 2.71 (m, 2H), 2.61-2.57 (m, 2H).

pent-4-en-2-yn-1-yl furan-2-carboxylate (**1aa**)

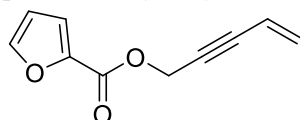

Colorless oil.  $^1\text{H NMR}$  (400 MHz,  $\text{CDCl}_3$ ):  $\delta = 7.62$  (s, 1H), 7.27-7.26 (m, 1H), 6.55-6.54 (m, 1H), 5.88-5.81 (m, 1H), 5.75-5.70 (m, 1H), 5.58-5.55 (m, 1H), 5.05 (s, 2H).

hept-6-en-4-yn-1-yl benzofuran-2-carboxylate (**1ab**)

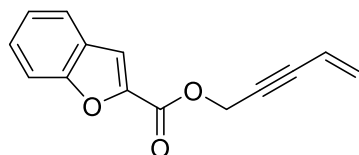

Colorless oil.  $^1\text{H NMR}$  (400 MHz,  $\text{CDCl}_3$ ):  $\delta = 7.72-7.70$  (m, 1H), 7.63-7.61 (m, 1H), 7.56-7.55 (m, 1H), 7.50-7.46 (m, 1H), 7.35-7.31 (m, 1H), 5.83-5.75 (m, 1H), 5.59 (dd,  $J = 2.2, 17.5$  Hz, 1H), 5.42 (dd,  $J = 2.2, 11.0$  Hz, 1H), 4.52 (t,  $J = 6.3$  Hz, 2H), 2.57-2.53 (m, 2H), 2.10-2.03 (m, 2H).

pent-4-en-2-yn-1-yl thiophene-2-carboxylate (**1ac**)

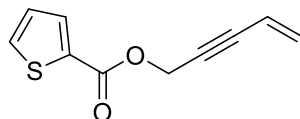

Colorless oil.  $^1\text{H NMR}$  (400 MHz,  $\text{CDCl}_3$ ):  $\delta = 7.88-7.86$  (m, 1H), 7.62-7.60 (m, 1H), 7.15-7.12 (m, 1H), 5.89-5.81 (m, 1H), 5.75-5.70 (m, 1H), 5.56 (dd,  $J = 2.2, 11.0$  Hz, 1H), 5.04 (s, 2H).

oct-7-en-5-yn-1-yl thiophene-2-carboxylate (**1ad**)

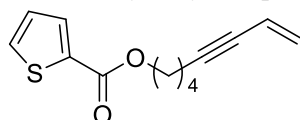

Colorless oil.  $^1\text{H NMR}$  (400 MHz,  $\text{CDCl}_3$ ):  $\delta = 7.83-7.81$  (m, 1H), 7.58-7.56 (m, 1H), 7.13-7.11



(m, 1H), 5.84-5.76 (m, 1H), 5.57 (dd,  $J = 2.0, 17.5$  Hz, 1H), 5.41 (dd,  $J = 2.0, 11.0$  Hz, 1H), 4.35 (t,  $J = 6.4$  Hz, 2H), 2.44-2.40 (m, 2H), 1.94-1.87 (m, 2H), 1.74-1.67 (m, 2H).

#### 2-(pent-4-en-2-yn-1-yl)isoindoline-1,3-dione (**1ae**)

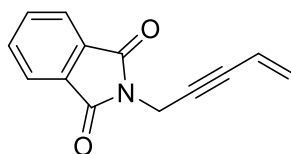

Colorless oil.  $^1\text{H NMR}$  (400 MHz,  $\text{CDCl}_3$ ):  $\delta = 7.91$ -7.89 (m, 2H), 7.77-7.75 (m, 2H), 5.80-5.73 (m, 1H), 5.68-5.63 (m, 1H), 5.51-5.47 (m, 1H), 4.59 (s, 2H).

#### 2-(hept-6-en-4-yn-1-yl)isoindoline-1,3-dione (**1af**)

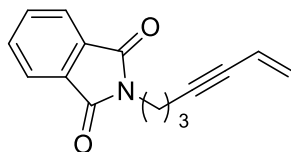

Colorless oil.  $^1\text{H NMR}$  (400 MHz,  $\text{CDCl}_3$ ):  $\delta = 7.86$ -7.84 (m, 2H), 7.73-7.71 (m, 2H), 5.66-5.58 (m, 1H), 5.44 (dd,  $J = 1.6, 17.5$  Hz, 1H), 5.30 (dd,  $J = 2.0, 11.0$  Hz, 1H), 3.81 (t,  $J = 7.1$  Hz, 2H), 2.42-2.39 (m, 2H), 2.00-1.93 (m, 2H).

### 3. General procedures for the synthesis of substrates (**1ag – 1aj**)<sup>2i, 3</sup>

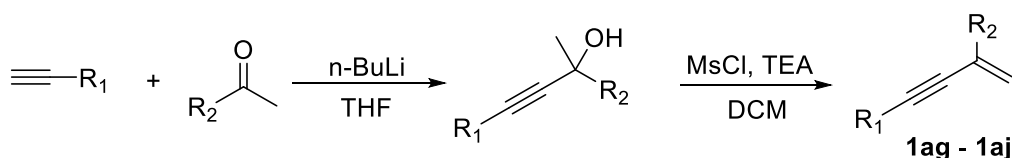

Under argon atmosphere, *n*-BuLi (8.0 mL, 2.5 M in hexane, 20 mmol) was added dropwise to a solution of alkyne (20 mmol) in anhydrous THF (50 mL) at  $-78$  °C. After addition, the resulting mixture was stirred at 0 °C for one hour. Then, cooled to  $-78$  °C, ketone (20 mmol) in 8 mL THF was added slowly. The reaction mixture was warmed slowly to room temperature and stirred for another 6 hours, then quenched with Sat.  $\text{NH}_4\text{Cl}$  (10 mL), and extracted with EtOAc three times. The combined organic layer was dried over  $\text{Na}_2\text{SO}_4$  and concentrated under reduced pressure to afford the crude material. The crude was dissolved in dry DCM (40 mL), and the mixture was cooled to 0 °C. TEA (100 mmol, 5 equiv) was added to this solution and methylsulfonyl chloride (50 mmol, 2.5 equiv) sequentially. After one hour the reaction was quenched with saturated aqueous  $\text{NH}_4\text{Cl}$  (40 mL). The aqueous layer was extracted with ethyl acetate and the combined organic layer was dried over  $\text{Na}_2\text{SO}_4$  filtered, and concentrated under reduced pressure. The crude material was purified by flash chromatography to yield the product.

#### 1-methoxy-4-(3-phenylbut-3-en-1-yn-1-yl)benzene (**1ag**)

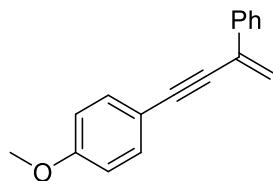

Colorless oil.  $^1\text{H NMR}$  (400 MHz,  $\text{CDCl}_3$ ):  $\delta = 7.78\text{-}7.75$  (m, 2H),  $7.52\text{-}7.50$  (m, 2H),  $7.44\text{-}7.34$  (m, 3H),  $6.93\text{-}6.90$  (m, 2H),  $5.98$  (d,  $J = 0.9$  Hz, 1H),  $5.76$  (d,  $J = 0.9$  Hz, 1H),  $3.86$  (s, 3H).

hex-5-en-3-yne-1,5-diylidibenzene (**1ah**)

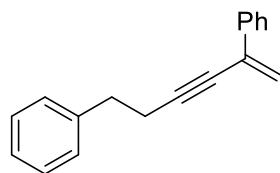

Colorless oil.  $^1\text{H NMR}$  (400 MHz,  $\text{CDCl}_3$ ):  $\delta = 7.60\text{-}7.58$  (m, 2H),  $7.38\text{-}7.26$  (m, 8H),  $5.88$  (s, 1H),  $5.60$  (s, 1H),  $2.97$  (t,  $J = 7.4$  Hz, 2H),  $2.76$  (t,  $J = 7.4$  Hz, 2H).

1-methoxy-4-(6-phenylhex-1-en-3-yn-2-yl)benzene (**1ai**)

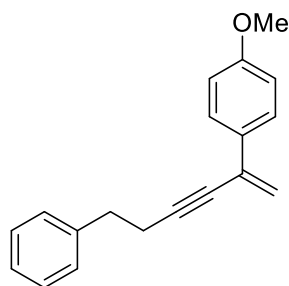

Colorless oil.  $^1\text{H NMR}$  (400 MHz,  $\text{CDCl}_3$ ):  $\delta = 7.54\text{-}7.52$  (m, 2H),  $7.37\text{-}7.27$  (m, 5H),  $6.88\text{-}6.86$  (m, 2H),  $5.76$  (s, 1H),  $5.50$  (s, 1H),  $3.85$  (s, 3H),  $2.96$  (t,  $J = 7.4$  Hz, 2H),  $2.75$  (t,  $J = 7.4$  Hz, 2H).

3-(3-phenylbut-3-en-1-yn-1-yl)thiophene (**1aj**)

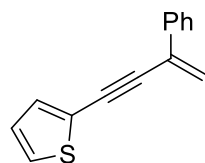

Colorless oil.  $^1\text{H NMR}$  (400 MHz,  $\text{CDCl}_3$ ):  $\delta = 7.75\text{-}7.73$  (m, 2H),  $7.56\text{-}7.55$  (m, 1H),  $7.43\text{-}7.32$  (m, 4H),  $7.24\text{-}7.22$  (m, 1H),  $6.00$  (d,  $J = 0.8$  Hz, 1H),  $5.77$  (d,  $J = 0.8$  Hz, 1H).

## 4. Optimization of reaction conditions

**Table S1.** Screening of ligands<sup>a</sup>

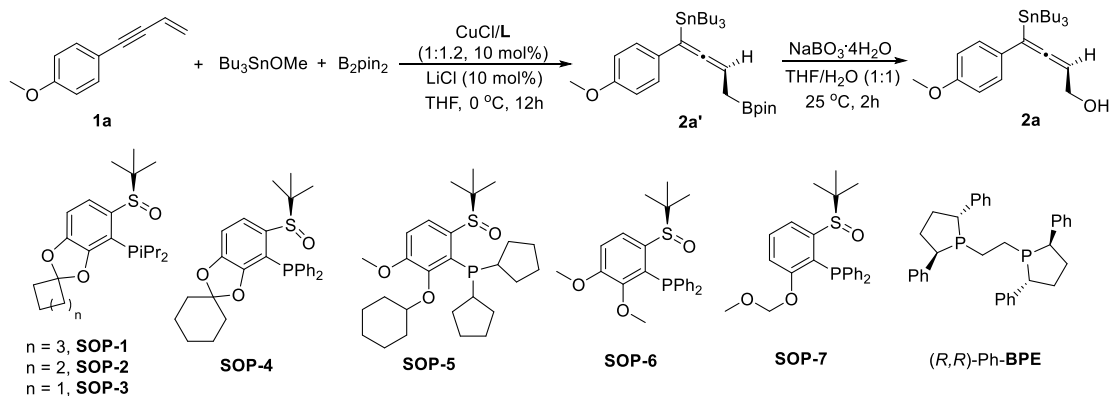

| Entry    | Ligand              | Yield (%) <sup>b</sup>    | ee (%) <sup>c</sup>       |
|----------|---------------------|---------------------------|---------------------------|
| <b>1</b> | <b>SOP-1</b>        | <b>97(73<sup>d</sup>)</b> | <b>94(76<sup>d</sup>)</b> |
| 2        | <b>SOP-2</b>        | 95(65)                    | 91(75)                    |
| 3        | <b>SOP-3</b>        | 94(65)                    | 88(83)                    |
| 4        | <b>SOP-4</b>        | 75(90)                    | 82(75)                    |
| 5        | <b>SOP-5</b>        | 80(58)                    | 88(84)                    |
| 6        | <b>SOP-6</b>        | 84(68)                    | 92(82)                    |
| 7        | <b>SOP-7</b>        | 82(64)                    | 85(79)                    |
| 8        | <b>(R,R)-Ph-BPE</b> | n.r.                      | n.d.                      |

<sup>a</sup>Reactions were carried out with **1a** (0.2 mmol), Bu<sub>3</sub>SnOMe (0.3 mmol), (Bpin)<sub>2</sub> (0.3 mmol), **L** (12 mol%), CuCl (10 mol%), with or without LiCl (10 mol%) in THF (1.0 mL) at 0°C for 12 h.

<sup>b</sup>The yield of **2a'** was determined by crude <sup>1</sup>H NMR analysis with 2-methylnaphthalene as internal standard, n.r. = no reaction, n.d. = not determined. <sup>c</sup>The ee value of **2a** was determined by chiral HPLC analysis. <sup>d</sup>data in parentheses, no LiCl was added.

**Table S2.** Screening of additives<sup>a</sup>

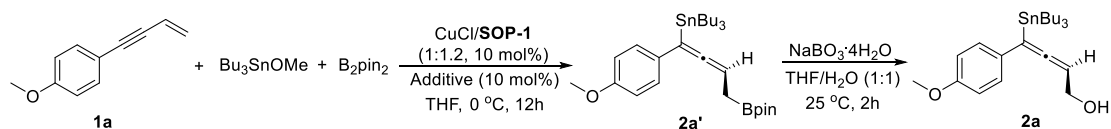

| entry    | additive                                          | Yield (%) <sup>b</sup> | ee (%) <sup>c</sup> |
|----------|---------------------------------------------------|------------------------|---------------------|
| 1        | LiCl                                              | 97                     | 94                  |
| 2        | Ph <sub>3</sub> PO                                | 72                     | 70                  |
| 3        | LiBr                                              | 95                     | 92                  |
| 4        | KCl                                               | 64                     | 80                  |
| 5        | FeCl <sub>2</sub>                                 | 80                     | 77                  |
| 6        | MgCl <sub>2</sub>                                 | 54                     | 78                  |
| 7        | Bu <sub>4</sub> NF <sup>+</sup> 3H <sub>2</sub> O | 74                     | 94                  |
| 8        | Bu <sub>4</sub> NCl <sup>+</sup> H <sub>2</sub> O | 95                     | 96                  |
| <b>9</b> | <b>Bu<sub>4</sub>NBr</b>                          | <b>99</b>              | <b>96</b>           |
| 10       | Bu <sub>4</sub> NI                                | 99                     | 95                  |

<sup>a</sup>Reactions were carried out with **1a** (0.2 mmol), Bu<sub>3</sub>SnOMe (0.3 mmol), (Bpin)<sub>2</sub> (0.3 mmol), **SOP-1** (12 mol%), CuCl (10 mol%), additive (10 mol%) in THF (1.0 mL) at 0°C for 12 h. <sup>b</sup>The

yield of **2a'** was determined by crude  $^1\text{H}$  NMR analysis with 2-methylnaphthalene as internal standard.<sup>c</sup>The *ee* value of **2a** was determined by chiral HPLC analysis.

**Table S3.** Screening of copper salt<sup>a</sup>

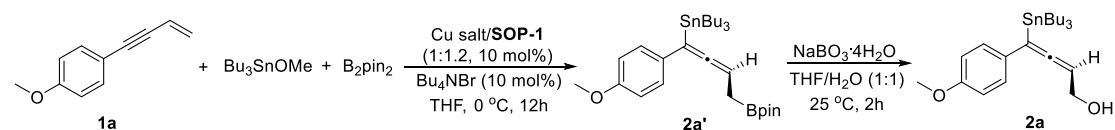

| Entry | Cu salt                                             | Yield (%) <sup>b</sup> | <i>ee</i> (%) <sup>c</sup> |
|-------|-----------------------------------------------------|------------------------|----------------------------|
| 1     | CuCl                                                | 99                     | 96                         |
| 2     | <b>CuBr</b>                                         | <b>99</b>              | <b>97</b>                  |
| 3     | CuI                                                 | 99                     | 96                         |
| 4     | CuTc                                                | 97                     | 95                         |
| 5     | CuPF <sub>6</sub> ·4CH <sub>3</sub> CN              | 98                     | 96                         |
| 6     | (CuOTf) <sub>2</sub> ·C <sub>7</sub> H <sub>8</sub> | 80                     | 96                         |
| 7     | CuOAc                                               | 98                     | 96                         |
| 8     | CuCl <sub>2</sub>                                   | n.r.                   | n.d.                       |

<sup>a</sup>Reactions were carried out with **1a** (0.2 mmol), Bu<sub>3</sub>SnOMe (0.3 mmol), (Bpin)<sub>2</sub> (0.3 mmol), **SOP-1** (12 mol%), Cu salt (10 mol%), Bu<sub>4</sub>NBr (10 mol%) in THF (1.0 mL) at 0 °C for 12 h. <sup>b</sup>The yield of **2a'** was determined by crude  $^1\text{H}$  NMR analysis with 2-methylnaphthalene as internal standard, n.r. = no reaction, n.d. = not determined. <sup>c</sup>The *ee* value of **2a** was determined by chiral HPLC analysis.

**Table S4.** Screening of solvent<sup>a</sup>

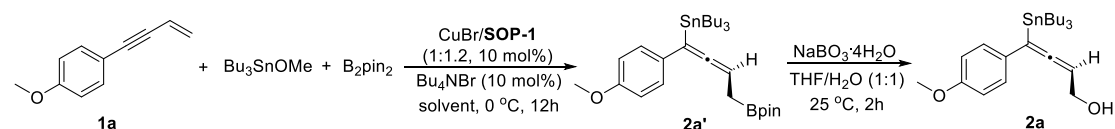

| Entry | Solvent                         | Yield (%) <sup>b</sup> | <i>ee</i> (%) <sup>c</sup> |
|-------|---------------------------------|------------------------|----------------------------|
| 1     | <b>THF</b>                      | <b>99</b>              | <b>97</b>                  |
| 2     | 2-Me-THF                        | 99                     | 96                         |
| 3     | CH <sub>3</sub> CN              | 99                     | 94                         |
| 4     | Toluene                         | 99                     | 96                         |
| 5     | 1,4-Dioxane                     | 99                     | 96                         |
| 6     | CHCl <sub>3</sub>               | 97                     | 95                         |
| 7     | CH <sub>2</sub> Cl <sub>2</sub> | 99                     | 94                         |
| 8     | DMF                             | 99                     | 96                         |
| 9     | MTBE                            | 99                     | 97                         |
| 10    | DCE                             | 99                     | 92                         |

<sup>a</sup>Reactions were carried out with **1a** (0.2 mmol), Bu<sub>3</sub>SnOMe (0.3 mmol), (Bpin)<sub>2</sub> (0.3 mmol), **SOP-1** (12 mol%), CuBr (10 mol%), Bu<sub>4</sub>NBr (10 mol%) in solvent (1.0 mL) at 0 °C for 12 h. <sup>b</sup>The yield of **2a'** was determined by crude  $^1\text{H}$  NMR analysis with 2-methylnaphthalene as internal standard. <sup>c</sup>The *ee* value of **2a** was determined by chiral HPLC analysis.

**Table S5.** Screening of catalyst loading<sup>a</sup>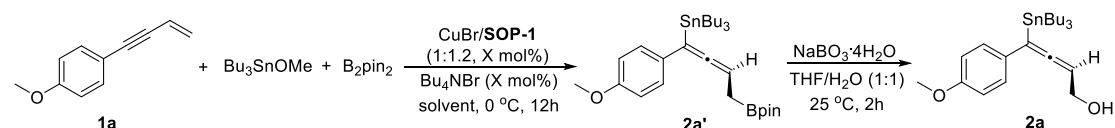

| entry    | X        | Yield (%) <sup>b</sup> | ee (%) <sup>c</sup> |
|----------|----------|------------------------|---------------------|
| 1        | 10       | 99                     | 97                  |
| 2        | 5        | 99                     | 97                  |
| 3        | 2        | 99                     | 97                  |
| <b>4</b> | <b>1</b> | <b>99</b>              | <b>97</b>           |

<sup>a</sup>Reactions were carried out with **1a** (0.2 mmol), Bu<sub>3</sub>SnOMe (0.3 mmol), (Bpin)<sub>2</sub> (0.3 mmol), **SOP-1** (1.2Xmol%), CuBr (X mol%), Bu<sub>4</sub>NBr (X mol%) in THF (1.0 mL) at 0°C for 12 h. <sup>b</sup>The yield of **2a'** was determined by crude <sup>1</sup>H NMR analysis with 2-methylnaphthalene as internal standard. <sup>c</sup>The *ee* value of **2a** was determined by chiral HPLC analysis.

**Table S6.** Screening of reaction temperature<sup>a</sup>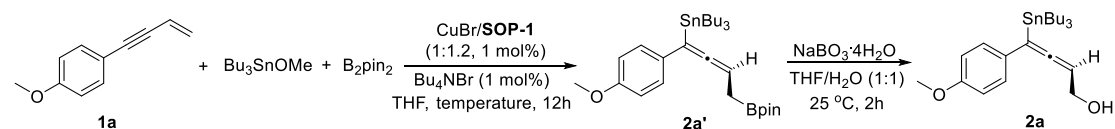

| Entry    | Temperature | Yield (%) <sup>b</sup> | ee (%) <sup>c</sup> |
|----------|-------------|------------------------|---------------------|
| 1        | 25 °C       | 99                     | 94                  |
| 2        | 10°C        | 99                     | 96                  |
| <b>3</b> | <b>0°C</b>  | <b>99</b>              | <b>97</b>           |
| 4        | -10°C       | 99                     | 96                  |
| 5        | -20°C       | 87                     | 95                  |

<sup>a</sup>Reactions were carried out with **1a** (0.2 mmol), Bu<sub>3</sub>SnOMe (0.3 mmol), (Bpin)<sub>2</sub> (0.3 mmol), **SOP-1** (1.2 mol%), CuBr (1 mol%), Bu<sub>4</sub>NBr (1 mol%) in THF (1.0 mL) for 12 h. <sup>b</sup>The yield of **2a'** was determined by crude <sup>1</sup>H NMR analysis with 2-methylnaphthalene as internal standard. <sup>c</sup>The *ee* value of **2a** was determined by chiral HPLC analysis.

## 5. General procedure for enantioselective 1,4-Borylstannation

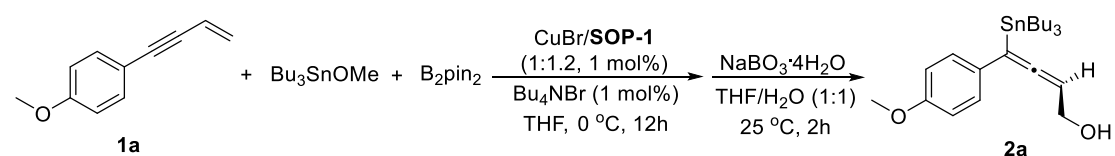

**Step 1:** In an argon-filled glovebox, a Schlenktube (labeled as **Vial A**) equipped with magnetic stir bar was charged with CuBr (2.8 mg, 0.02 mmol), **SOP-1** (9.8mg, 0.024 mmol), Bu<sub>4</sub>NBr (6.3 mg, 0.02 mmol) and 1.0 mL dry THF, then the mixture was stirred at 40 °C for 30 minutes.

**Step 2:** The in-situ generated complex (0.1 mL, 1 mol%) (in **Vial A**), B<sub>2</sub>pin<sub>2</sub> (75 mg, 0.3 mmol, 1.5 equiv.) and THF (0.9 mL) were added to another tube (labeled as **Vial B**), then the mixture was removed from the glovebox and cooled to 0 °C, **1** (0.2mmol) and Bu<sub>3</sub>SnOMe (96 mg, 0.3 mmol, 1.5 equiv.) were added, and the resulting mixture was stirred for 12 hours at 0 °C. The reaction

mixture was filtrated through a celite pad, concentrated. Then, a 10 mL vial with a stir bar was charged the products, 2.0 mL THF, 2.0 mL H<sub>2</sub>O and NaBO<sub>3</sub>·4H<sub>2</sub>O (200 mg, 1.3 mmol, 6.5 equiv.) were added, then stirred at 25 °C for 2 hours. After the reaction was completed, the mixture was extracted with EtOAc (3\*10 mL), dried over Na<sub>2</sub>SO<sub>4</sub>. The combined organic phase was evaporated under vacuo, purified by preparative TLC (silica gel, 20 × 20 cm, 2 mm), petro ether/Acetate (5/1) to get the product.

**Note: Since the allene products are unstable, procedures involving allenes should be performed under 25 °C**

**The ee values of part of products 2, which could not be directly determined, was determined by chiral HPLC analysis after a derivatization to 2'.**

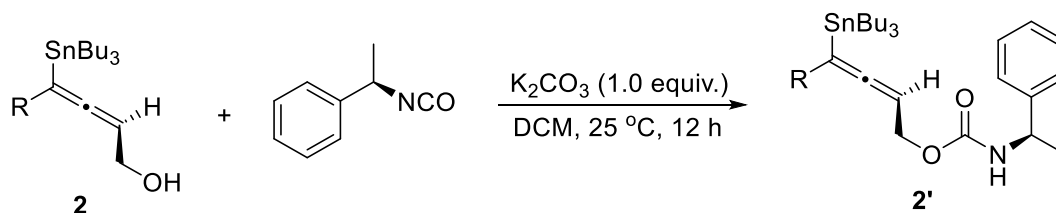

**General procedure:** **2** was added K<sub>2</sub>CO<sub>3</sub> (1.0 equiv.), (*R*)-(1-isocyanatoethyl)benzene (2.0 equiv.) and CH<sub>2</sub>Cl<sub>2</sub> (1.0 mL), the mixture was stirred at room temperature for 12 hours. The reaction mixture was filtrated through a celite pad, concentrated, and purified by preparative TLC (silica gel, 20 × 20 cm, 2 mm), petro ether/Acetate (6/1) to get the product **2'**.

## 6. Procedure for gram scale experiment

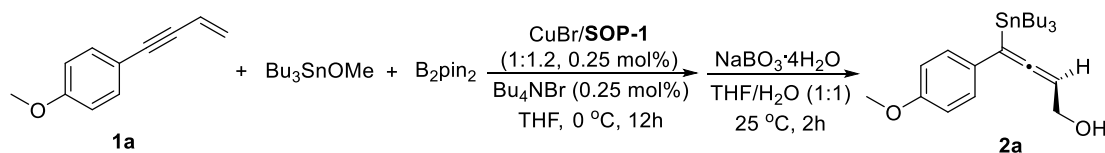

In an argon-filled glovebox, a Schlenk tube equipped with magnetic stir bar was charged with CuBr (2.8 mg, 0.02 mmol, 0.25 mol%), **SOP-1** (9.8 mg, 0.024 mmol, 0.3 mol%), Bu<sub>4</sub>NBr (6.3 mg, 0.02 mmol, 0.25 mol%) and 4.0 mL dry THF, then the mixture was stirred at 40 °C for 30 minutes. The in-situ generated complex was added B<sub>2</sub>pin<sub>2</sub> (3 g, 1.5 equiv.), **1a** (1.26 g, 8 mmol), and removed from the glovebox and cooled to 0 °C, then Bu<sub>3</sub>SnOMe (3.85 g, 1.5 equiv.) was added dropwise. The reaction was stirred at 0 °C for 24 hours. The reaction mixture was filtrated through a celite pad, concentrated, the crude product was added THF (30 mL), H<sub>2</sub>O (30 mL) and NaBO<sub>3</sub>·4H<sub>2</sub>O (6.0 g, 39.2 mmol, 4.9 equiv.), and stirred at 25 °C for 2 hours. After the reaction was completed, the mixture was extracted with EtOAc (3\*50 mL), dried over Na<sub>2</sub>SO<sub>4</sub>. The combined organic phase was evaporated under vacuo, purified by rapid silica gel chromatography on deactivated silica gel (PE/EA = 10/1) to give the desired product **2a** (3.45 g, 93% yield, 96% *ee*).

## 7. Procedure for Transformation<sup>4</sup>

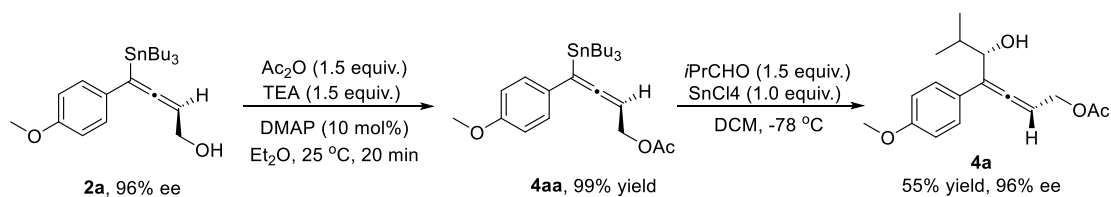

**2a** (200 mg, 0.43 mmol, 96% *ee*) was added ether (2.0 mL), triethylamine (65 mg, 1.5 equiv.), 4-dimethylaminopyridine (5.2 mg, 10 mol%) and Ac<sub>2</sub>O (65 mg, 1.5 equiv.) sequentially, then the mixture was stirred at 25 °C for 20 minutes. After the reaction was completed, the mixture was concentrated, the crude product was purified by flash column chromatography on silica gel (PE/EA = 10/1) to give the product **3a** (217 mg, 99% yield).

To a solution of **3a** (180 mg, 0.35 mmol) in CH<sub>2</sub>Cl<sub>2</sub> (2 mL) was added SnCl<sub>4</sub> (1 M in hexane) (0.35 mL, 1.0 equiv.) at -78 °C. After 30 minutes, isobutyraldehyde (41 mg, 1.5 equiv.) was added. The mixture was stirred for 30 minutes at -78 °C, then quenched with saturated aqueous NH<sub>4</sub>Cl (3 mL) and extracted with DCM (3×10 mL), dried over Na<sub>2</sub>SO<sub>4</sub>. The combined organic phase was evaporated under vacuo, purified by flash column chromatography on silica gel (PE/EA = 5/1) to give the product **4a** (56 mg, 55% yield, 96% *ee*)

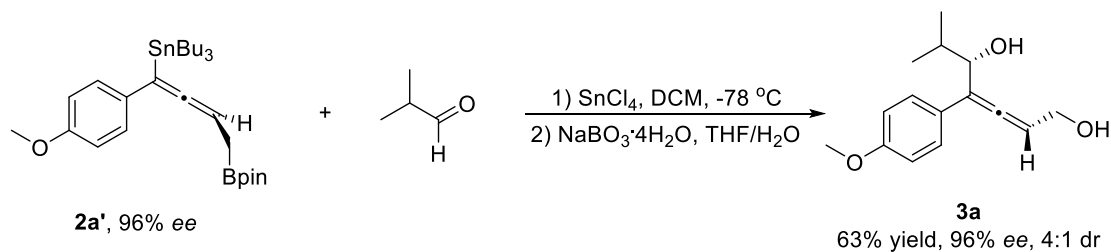

To a stirred solution of chiral bronc ester **2a'** (170 mg, 0.3 mmol) in DCM (2 mL), was added SnCl<sub>4</sub> (0.3 mL, 1.0 M in hexane, 0.3 mmol) dropwise at -78 °C. After 30 min., iPrCHO (33 mg, 0.45 mmol) in DCM (0.5 mL) was added, then, the reaction mixture was continued to stir at -78 °C for 30 min. Then the reaction was quenched with saturated aqueous NH<sub>4</sub>Cl (3 mL) and extracted with DCM (3×10 mL), dried over Na<sub>2</sub>SO<sub>4</sub>. The combined organic phase was evaporated under vacuo, the crude product was added THF (3 mL), H<sub>2</sub>O (3 mL) and NaBO<sub>3</sub> 4H<sub>2</sub>O (180 mg, 1.2 mmol), and stirred at 25 °C for 2 hours. After the reaction was completed, the mixture was extracted with EtOAc (3×50 mL), dried over Na<sub>2</sub>SO<sub>4</sub>. The combined organic phase was evaporated under vacuo, purified by flash column chromatography on silica gel (PE/EA = 5:1 to 1/1) to give the product (47 mg, 63% yield, 96% *ee*, 4:1 dr).

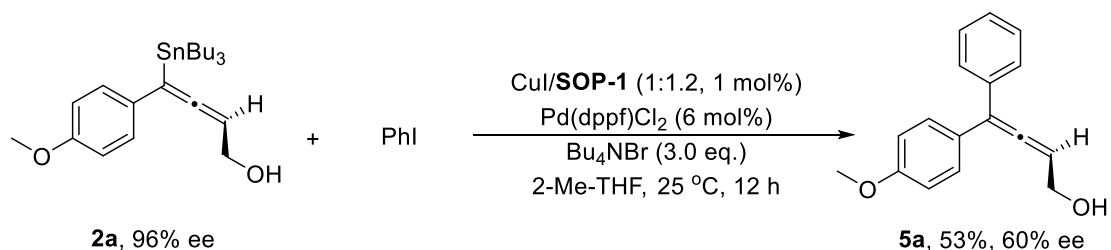

In an argon-filled glovebox, a Schlenk tube equipped with magnetic stir bar was charged with CuI (1.9 mg, 0.01 mmol, 1 mol%), **SOP-1** (4.9 mg, 0.012 mmol, 1.2 mol%), 1.0 mL dry 2-Me-THF, then the mixture was stirred at 40 °C for 30 minutes. The in-situ generated complex was added **2a** (47 mg, 0.1 mmol), PhI (41 mg, 0.2 mmol, 2.0 eq.), Pd(dppf)Cl<sub>2</sub> (4.4 mg, 0.06 mmol,

6 mol%), Bu<sub>4</sub>NBr (92 mg, 0.3 mmol, 3.0 eq.), the resulting mixture was then removed out from the glove-box, and stirred at 25 °C for 12 h. The reaction mixture was filtrated through a celite pad, concentrated, and purified by preparative TLC (silica gel, 20 × 20 cm, 2 mm), petro ether/Acetate (5/1) to get the product.

## 8. Control experiments

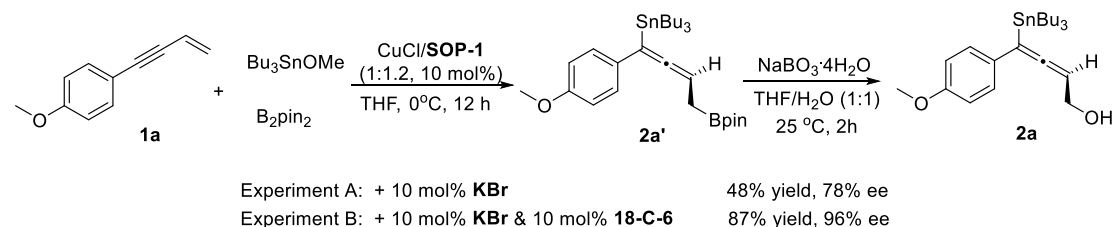

<sup>a</sup>Reactions were carried out with **1a** (0.2 mmol), Bu<sub>3</sub>SnOMe (0.3 mmol), (Bpin)<sub>2</sub> (0.3 mmol), **SOP-1** (1.2 mol%), CuCl (10 mol%), KBr (10 mol%) in THF (1.0 mL) at 0 °C for 12 h. <sup>b</sup>The yield of **2a'** was determined by crude <sup>1</sup>H NMR analysis with 2-methylnaphthalene as internal standard. <sup>c</sup>The *ee* value of **2a** was determined by chiral HPLC analysis.

### General procedure:

In an argon-filled glovebox, a Schlenk tube equipped with magnetic stir bar was charged with CuCl (2 mg, 0.02 mmol, 10 mol%), **SOP-1** (9.8 mg, 0.024 mmol, 10 mol%), KBr (2.4 mg, 10 mol%) and 1.0 mL dry THF, then the mixture was stirred at 40 °C for 30 minutes. The in-situ generated complex was added B<sub>2</sub>pin<sub>2</sub> (75 mg, 1.5 equiv.) **with or without** 18-crown-6 (5.0 mg, 10 mol%), then the mixture was removed from the glovebox and cooled to 0 °C, **1a** (32 mg, 0.2 mmol) and Bu<sub>3</sub>SnOMe (96 mg, 1.5 equiv.) were added, and the resulting mixture was stirred for 12 hours at 0 °C. The reaction mixture was filtrated through a celite pad, concentrated, then the NMR yield of **2a'** was determined by crude <sup>1</sup>H NMR analysis with 2-methylnaphthalene as internal standard. The *ee* value was determined after oxidation to the oxidized allene product: a 10 mL vial with a stir bar was charged the crude product, 2.0 mL THF, 2.0 mL H<sub>2</sub>O and NaBO<sub>3</sub>·4H<sub>2</sub>O (200 mg, 1.3 mmol, 6.5 equiv.) were added, then stirred at 25 °C for 2 hours. After the reaction was completed, the mixture was extracted with EtOAc (3\*10 mL), dried over Na<sub>2</sub>SO<sub>4</sub>. The combined organic phase was evaporated under vacuo, purified by preparative TLC (silica gel, 20 × 20 cm, 2 mm), petro ether/Acetate (5/1) to get the pure product.

## 9. Experimental Procedures for the Kinetic Studies

### Procedures for determining the rate order of the reactants.

**Step 1.** In an argon-filled glovebox, a Schlenk tube equipped with magnetic stir bar was charged with CuBr (2.8 mg, 0.02 mmol), **SOP-1** (9.8 mg, 0.024 mmol), Bu<sub>4</sub>NBr (6.3 mg, 0.02 mmol) and 1.0 mL dry THF, then the mixture was stirred at 40 °C for 30 minutes. (In-situ generated chiral complex, 0.02 M, in THF)

**Step 2.** 50 μL (1 mol%) of the above stock solution was added to a screw-capped vial, the solvent was evaporated. Then, THF-d<sub>8</sub> (0.5 mL), **1a** (16 mg, 0.1 mmol), B<sub>2</sub>pin<sub>2</sub> (38 mg, 0.15 mmol, 1.5 equiv.) were added.



**Step 3.** Bu<sub>3</sub>SnOMe (48 mg, 0.15 mmol, 1.5 equiv.) was added to the vial. This time was set as time 0.

**Step 4.** Immediately after, 500 μL of the reaction mixture was then transferred into a NMR tube. Then, the NMR tube was removed out from the glovebox.

**Step 5.** <sup>1</sup>H NMR was recorded automatically at an interval of 25/26 seconds (NS = 4; DS = 2). The first data point was normally recorded at ~7 min.

**Step 6.** Step 2-5 were repeated, with a changed amount of **1a**, or Bu<sub>3</sub>SnOMe, or B<sub>2</sub>pin<sub>2</sub>.

These procedures were conducted at 17 °C. Qualitatively identical conclusions could be drawn from these results.

**Reaction profile of the 1,4-addition.**

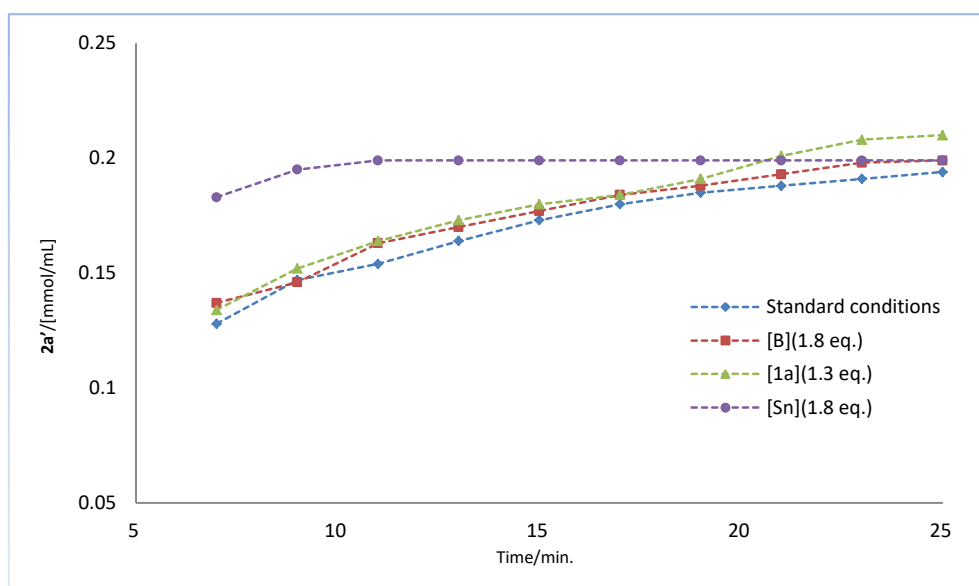

### Procedures for determining the rate order of the chiral complex.

**Step 1.** In an argon-filled glovebox, a Schlenk tube equipped with magnetic stir bar was charged with CuBr (2.8 mg, 0.02 mmol), **SOP-1** (9.8 mg, 0.024 mmol), Bu<sub>4</sub>NBr (6.3 mg, 0.02 mmol) and 1.0 mL dry THF, then the mixture was stirred at 40 °C for 30 minutes. (Chiral complex, 0.02 M, in THF)

**Step 2.** 50 μL (1 mol%) of the above stock solution was added to a screw-capped vial, the solvent was evaporated. Then, THF-d<sub>8</sub> (0.5 mL), **1a** (16 mg, 0.1 mmol), B<sub>2</sub>pin<sub>2</sub> (38 mg, 0.15 mmol, 1.5 equiv.) were added.

**Step 3.** Bu<sub>3</sub>SnOMe (48 mg, 0.15 mmol, 1.5 equiv.) was added to the vial. This time was set as time 0.

**Step 4.** Immediately after, 500 μL of the reaction mixture was then transferred into a NMR tube. Then, the NMR tube was removed out from the glovebox.

**Step 5.** <sup>1</sup>H NMR was recorded automatically at an interval of 25/26 seconds (NS = 4; DS = 2). The first data point was normally recorded at ~7 min.

**Step 6.** Step 2-5 was repeated, with a changed amount of catalyst loading.

These procedures were conducted at 17 °C. Qualitatively identical conclusions could be drawn from these results.

### Rates determined while varying CuBr + SOP-1+Bu<sub>4</sub>NBr together (1:1.2:1 molar ratio)

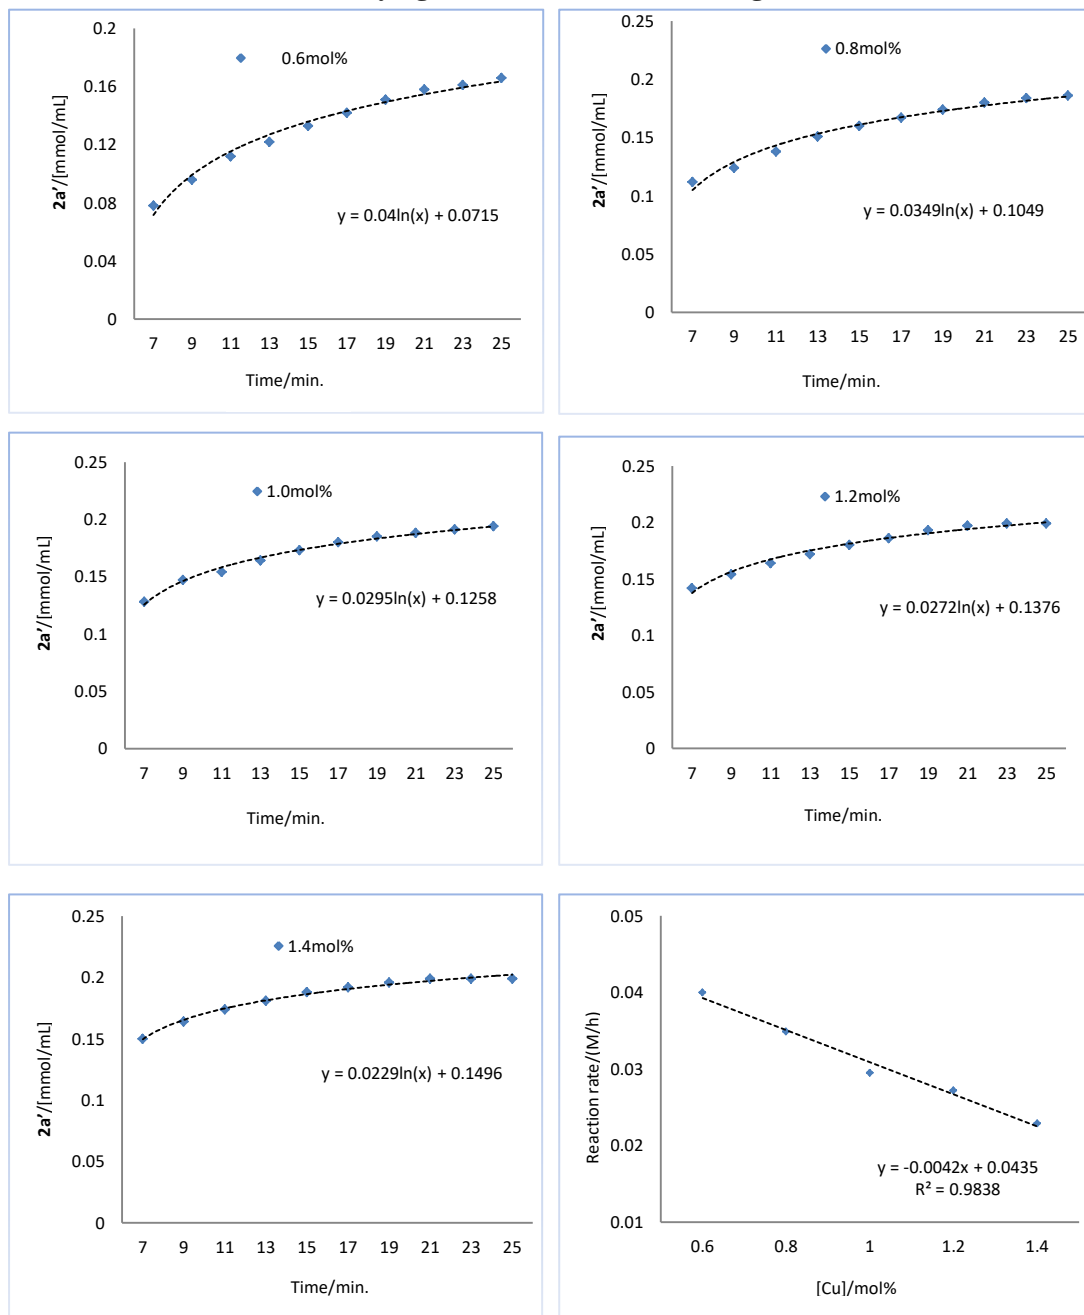

### Procedures for reaction kinetics on Bu<sub>4</sub>NBr.

**Step 1.** In an argon-filled glovebox, a Schlenk tube equipped with magnetic stir bar was charged with CuBr (2.8 mg, 0.02 mmol), **SOP-1** (9.8 mg, 0.024 mmol) and 1.0 mL dry THF, then the mixture was stirred at 40 °C for 30 minutes. (Chiral complex, 0.02 M, in THF)

In another a Schlenk tube, Bu<sub>4</sub>NBr (6.3 mg, 0.02 mmol) and CH<sub>3</sub>CN (1.0 mL) were added, the solution of Bu<sub>4</sub>NBr in CH<sub>3</sub>CN was prepared (0.02 M, in CH<sub>3</sub>CN).

**Step 2.** 50 μL (1 mol%) of the above **SOP**/Cu solution in THF and 50 μL (1 mol%) Bu<sub>4</sub>NBr solution in CH<sub>3</sub>CN were added to a screw-capped vial, the solvent was evaporated. Then, THF-d<sub>8</sub> (0.5 mL), **1a** (16 mg, 0.1 mmol), B<sub>2</sub>pin<sub>2</sub> (38 mg, 0.15 mmol, 1.5 equiv.) were added.

**Step 3.** Bu<sub>3</sub>SnOMe (48 mg, 0.15 mmol, 1.5 equiv.) was added to the vial. This time was set as

time 0.

**Step 4.** Immediately after, 500  $\mu\text{L}$  of the reaction mixture was then transferred into a NMR tube. Then, the NMR tube was removed out from the glovebox.

**Step 5.**  $^1\text{H}$  NMR was recorded automatically at an interval of 25/26 seconds (NS = 4; DS = 2). The first data point was normally recorded at  $\sim 7$  min.

**Step 6.** Steps 2-5 were repeated, with a changed amount of  $\text{Bu}_4\text{NBr}$ .

These procedures were conducted at 23  $^\circ\text{C}$ . Qualitatively identical conclusions could be drawn from these results.

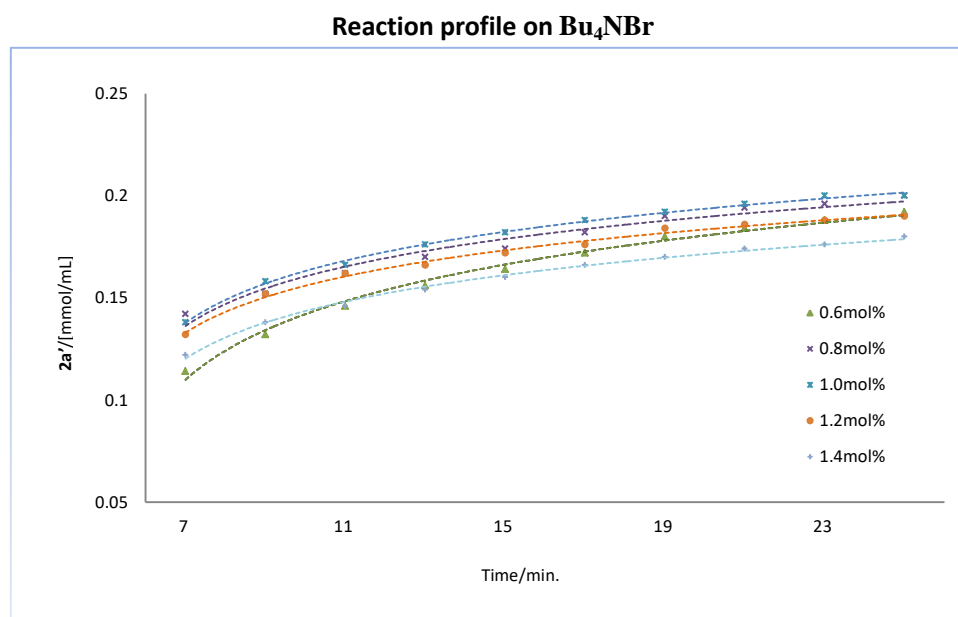

### Procedures for nonlinear effect experiments

**Step 1:** A Schlenktube (labeled as **Vial A**) equipped with magnetic stir bar was charged with  $\text{CuBr}$  (2.8 mg, 0.02 mmol), **SOP-1** or/and (*S*)-**SOP-1** (9.8 mg in total, 0.024 mmol),  $\text{Bu}_4\text{NBr}$  (6.3 mg, 0.02 mmol) and 1.0 mL dry THF, then the mixture was stirred at 40  $^\circ\text{C}$  for 30 minutes.

**Step 2:** The in-situ generated complex (0.1 mL, 1 mol%) (in **Vial A**),  $\text{B}_2\text{pin}_2$  (75 mg, 0.3 mmol, 1.5 equiv.) and THF (0.9 mL) were added to another tube (labeled as **Vial B**), then the mixture was removed from the glovebox and cooled to 0  $^\circ\text{C}$ , **1** (0.2 mmol) and  $\text{Bu}_3\text{SnOMe}$  (96 mg, 0.3 mmol, 1.5 equiv.) were added, and the resulting mixture was stirred for 12 hours at 0  $^\circ\text{C}$ . The reaction mixture was filtrated through a celite pad, concentrated. The yield was determined by crude  $^1\text{H}$  NMR. Then, a 10 mL vial with a stir bar was charged the products, 2.0 mL THF, 2.0 mL  $\text{H}_2\text{O}$  and  $\text{NaBO}_3 \cdot 4\text{H}_2\text{O}$  (200 mg, 1.3 mmol, 6.5 equiv.) were added, then stirred at 25  $^\circ\text{C}$  for 2 hours. After the reaction was completed, the mixture was extracted with  $\text{EtOAc}$  (3\*10 mL), dried over  $\text{Na}_2\text{SO}_4$ . The combined organic phase was evaporated under vacuo, purified by preparative TLC (silica gel, 20  $\times$  20 cm, 2 mm), petro ether/Acetate (5/1) to get the product to determine the ee value.

**Step 3.** Steps 1-2 were repeated, with a changed amount of **SOP-1** and (*S*)-**SOP-1**.

Qualitatively identical conclusions could be drawn from these results.

#### ee values and yields with different ee values of ligand

| Entry | ee of ligand (%) | Yield of <b>2a'</b> (%) | ee of <b>2a</b> (%) |
|-------|------------------|-------------------------|---------------------|
| 1     | 75 ( <i>R</i> )  | >99                     | 74 ( <i>S</i> )     |
| 2     | 50               | >99                     | 45                  |

|   |         |     |         |
|---|---------|-----|---------|
| 3 | 25      | >99 | 24      |
| 4 | 0       | >99 | 0       |
| 5 | -25     | >99 | -24     |
| 6 | -50     | >99 | -48     |
| 7 | -75 (S) | >99 | -72 (R) |

### Nonlinear effect of the 1,4-addition

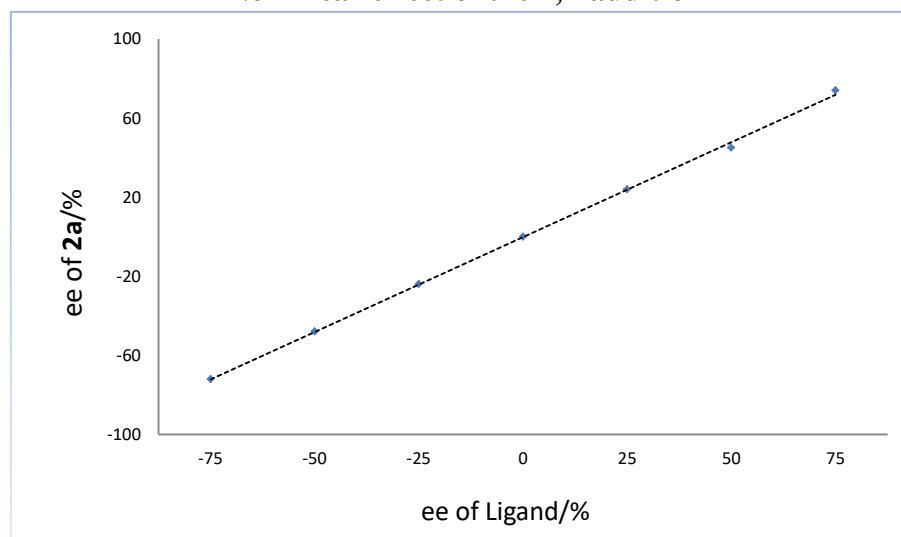

### Reference

- 1 a) D. Wang, P. Cao, B. Wang, T. Jia, Y. Lou, M. Wang, J. Liao, *Org. Lett.* **2015**, *17*, 2420. b) Y. Lou, P. Cao, T. Jia, Y. Zhang, M. Wang, J. Liao, *Angew. Chem. Int. Ed.* **2015**, *54*, 12134. c) T. Jia, P. Cao, B. Wang, Y. Z. Lou, X. M. Yin, M. Wang, J. Liao, *J. Am. Chem. Soc.* **2015**, *137*, 13760. d) F. Lang, G. Chen, L. Li, J. Xing, F. Han, L. Cun, J. Liao, *Chem. Eur. J.* **2011**, *17*, 5242.
- 2 a) F. Meng, F. Haeffner, A.-H. Hoveyda, *J. Am. Chem. Soc.* **2014**, *136*, 11304. b) Y. Lan, X. Chang, P. Fan, C. Shan, Z. Liu, T.-P. Loh, Y.-He. Xu, *ACS Catal.* **2017**, *7*, 7120. c) Y. Zhang, B. Yu, B. Gao, T. Zhang, H. Huang, *Org. Lett.* **2019**, *21*, 535. d) N. Adamson, H. Jeddi, S.-J. Malcolmson, *J. Am. Chem. Soc.* **2019**, *141*, 8574. e) L.-B. Romero, S.-L. Buchwald, *J. Am. Chem. Soc.* **2019**, *141*, 13788. f) H.-L. Sang, S. Yu, S. Ge, *Org. Chem. Front.* **2018**, *5*, 1284. g) A. Tikad, A. Hamze, O. Provot, J.-D. Brion, M. Alami, *Eur. J. Org. Chem.* **2010**, 725. h) X. Chang, Z. Liu, Y. Luo, C. Yang, X. Liu, B. Da, J. Li, T. Ahmad, T. Loh, Y. Xu, *Chem. Commun.* **2017**, *53*, 9344. i) Y. Liao, X. M. Yin, X. H. Wang, W. Z. Yu, D. M. Fang, L. R. Hu, M. Wang, J. Liao, *Angew. Chem. Int. Ed.* **2020**, *59*, 1176–1180.
3. X. Zhu, W. Deng, M. Chiou, C. Ye, W. Jian, Y. Zeng, Y. Jiao, L. Ge. Y. Li, X. Zhang, H. Bao, *J. Am. Chem. Soc.* **2019**, *141*, 548.
4. J. A. Marshall, J. Perkins, *J. Org. Chem.* **1994**, *59*, 3509.

## 10. Density functional theory (DFT) calculations

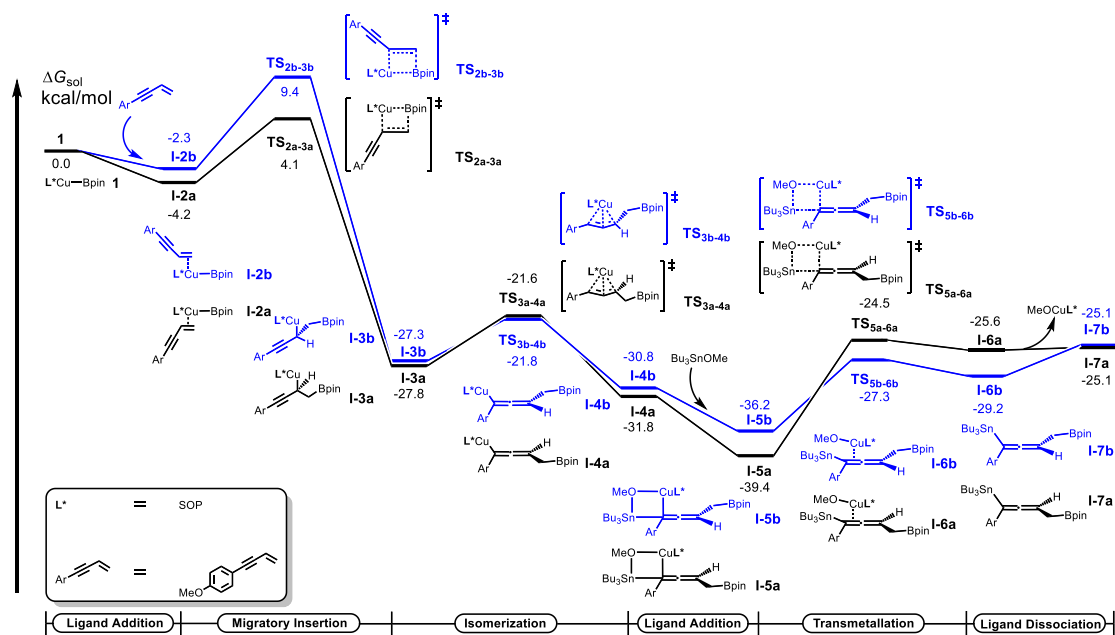

Figure X1. DFT-calculated energy profile of the enantioselective 1,4-addition reaction of 1,3-enynes without additives (1 has been set as the zero point of energy)

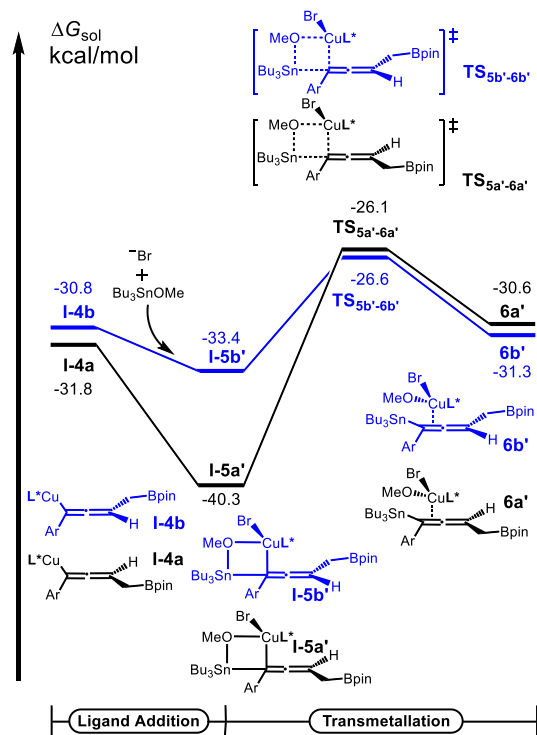

Figure X2. DFT-calculated energy profile of the enantioselective 1,4-addition reaction of 1,3-enynes with bromide anion (1 has been set as the zero point of energy)

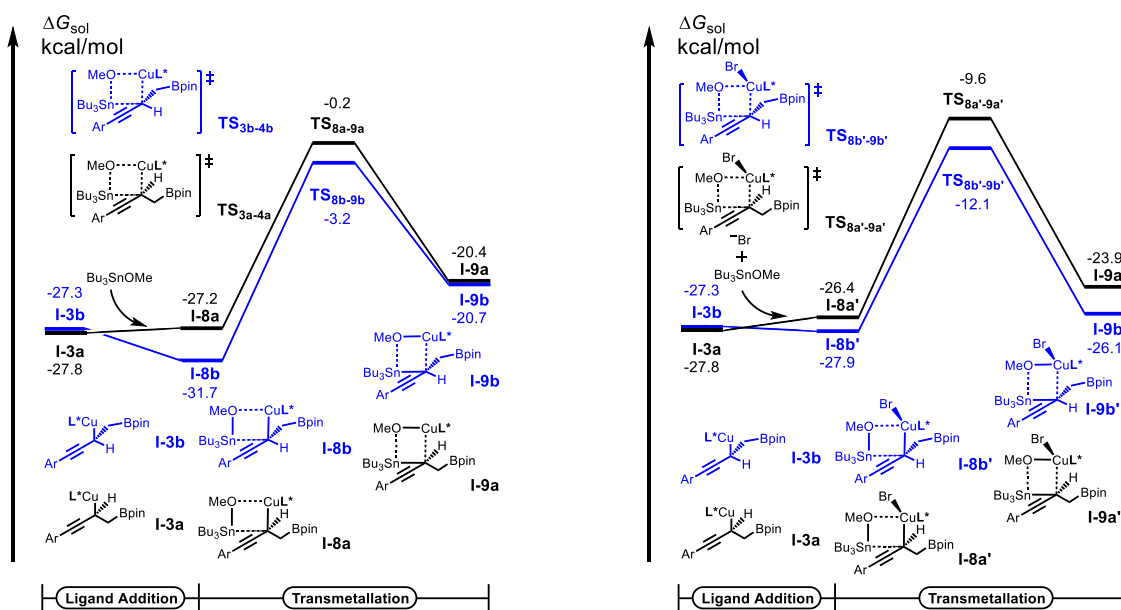

Figure X3. DFT-calculated energy profile of transmetalation happened before isomerization with and without bromide anion (**1** has been set as the zero point of energy)

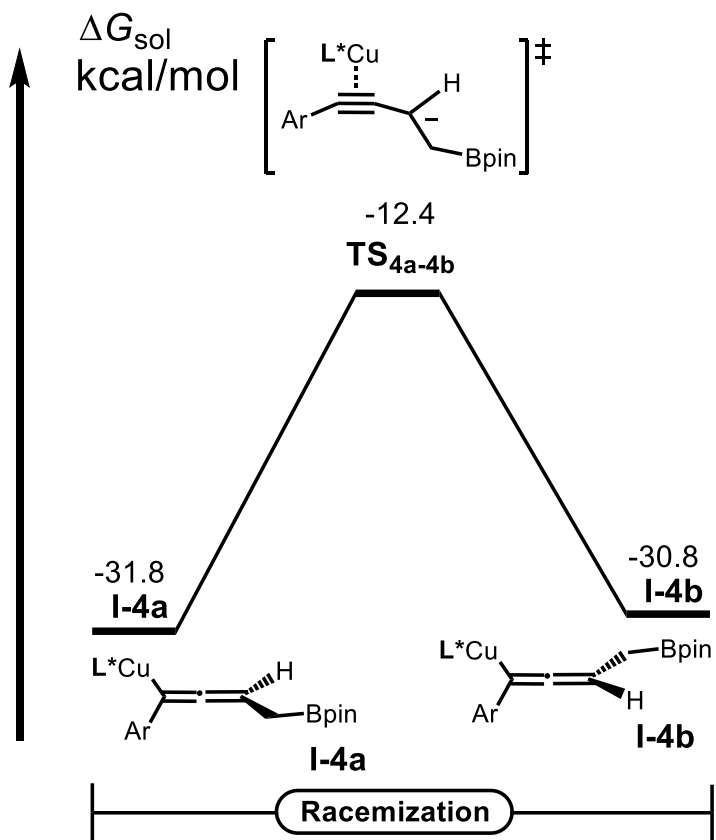

Figure X4. DFT-calculated energy profile of axially chiral allenylcopper intermediate **4a** racemization without bromide anion (**1** has been set as the zero point of energy)

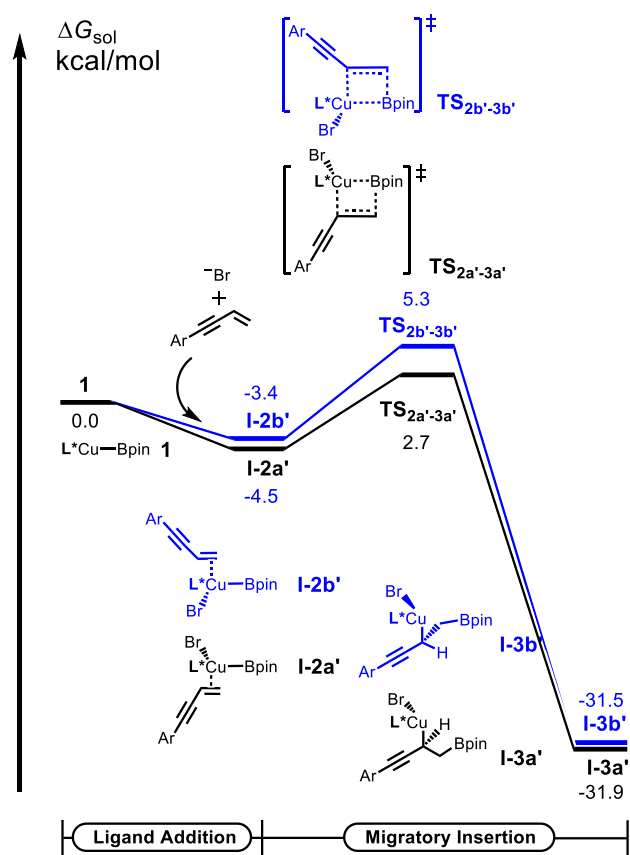

Figure X5. DFT-calculated energy profile of enantio-determining step with bromide anion (**1** has been set as the zero point of energy)

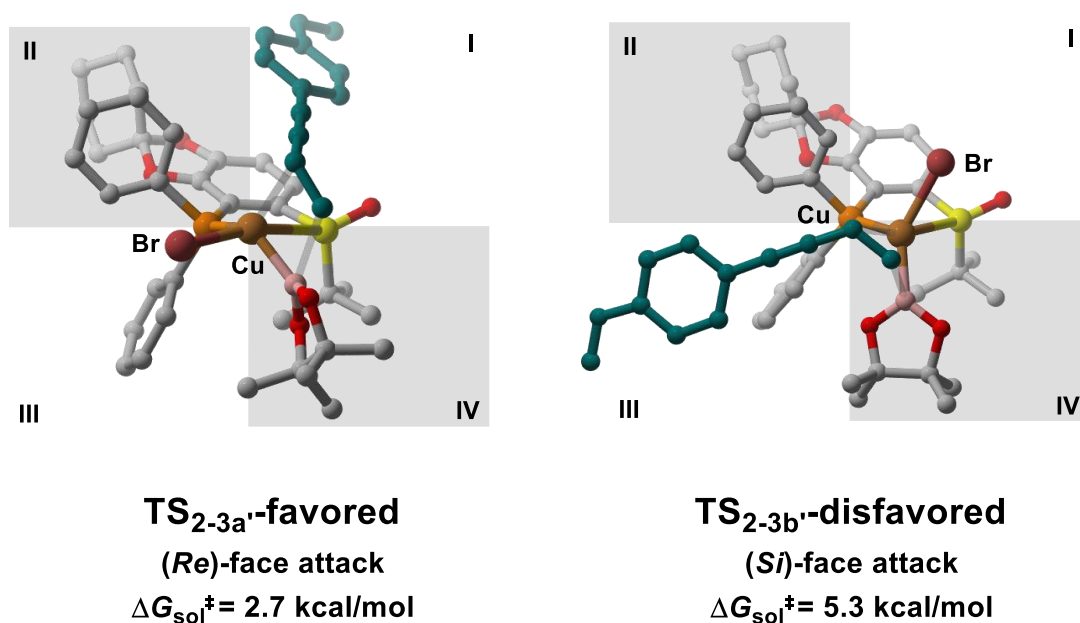

Figure X6. Enantioselectivity-determining migratory insertion step transition states with bromide anion

DFT calculation has been conducted to give more details on the mechanism and origin of chemoselectivity. Figure X1 shows the most preferred enantioselective 1,4-addition energy profile

of 1,3-enyne without additives. Calculation results revealed that the initial 1,3-enyne migratory insertion is irreversible. Thus, it is the enantio-determining step for this reaction. The migratory insertion transition state (**TS**<sub>2a-3a</sub>) leading to the preferential formation of the (S)-propargylcopper intermediate **I-3a** has an activation free energy that is 5.3 kcal/mol lower than the disfavored transition state **TS**<sub>2b-3b</sub>. Previous research works also proposed a similar enantioselective hydrocupration step of 1,3-enyne in their theoretical calculations.[ *J. Am. Chem. Soc.* **2018**, *140*, 2643–2655.; *Science* **2016**, *353*, 144-150.; *Commun. Chem.*, **2018**, *1*, 64. *Angew. Chem. Int. Ed.* **2020**, *59*, 1176–1180.] Then the highly enantioenriched propargylcopper **I-3a** isomerized to an axially chiral allenylcopper intermediate **I-4a** in a stereospecific fashion. Finally, coordination of **I-4a** with Bu<sub>3</sub>SnOMe complex followed by transmetallation and afforded the final product of axially chiral allenylpalladium **I-6a**. DFT calculations show that the reaction leading to the major diastereomer **I-6a** is an exothermic process with ca. 25.6 kcal/mol, and the rate-limiting step of the mechanism is the transmetallation of **I-5a** with an energy barrier of 14.9 kcal/mol. And the minor diastereomer **I-6b** has been predicted energetically unfavorable for the enantio-determining step (e.g., the migratory insertion transition states **TS**<sub>2b-3b</sub> is energetically higher than **TS**<sub>2a-3a</sub> of 5.3 kcal/mol).

Owing to the experimental results show that the significant role of bromide anion played in promoting enantioselective and yield of this reaction. The effect of bromide anion on the reaction mechanism has been carefully analyzed and presented in Figure X1 and X2. It shows that bromide anion will stabilize **I-5a** with 0.9 kcal/mol after coordinating an additional bromide anion and forming **I-5a'**. Synergistically **I-5b** has been destabilized with 2.8 kcal/mol after coordinating with a bromide anion (energy rising from -36.2 kcal/mol for **I-5b** to -33.4 kcal/mol for **I-5b'**). The synergistic stabilization and destabilization effects can also be observed at transmetallation transition states and products. Moreover, bromide anion will also reduce the energy barrier from **I-5a** to **I-6a** with 0.7 kcal/mol (transmetallation energy barriers with bromide anion reducing from 14.9 kcal/mol for without bromide anion to 14.2 kcal/mol), which is the rate-determine step for this reaction. All these effects of bromide anion make the formation of desired product **I-6a'** much easier both thermodynamically and kinetically.

In addition, we also calculated the potential epimerization pathways from **I-4a** to **I-4b** (Figure X4). It turns out that the racemization steps have much higher energy barriers



(19.4 kcal/mol from **I-4a** to **I-4b**) than the rate-limiting step of the enantioselective 1,4-addition reactions. Thus, the racemization process of **I-4a** is energetically unfavorable and the **I-3a** generated from the enantio-determining step will proceed in a stereospecific fashion to produce the final enantioselective product **I-7a**. And the potential pathways of transmetallation that happened before isomerization with and without bromide anion (Figure X3) have also been carefully checked to be unfavorable in comparison with isomerization from **I-3a** to **I-4a**.

### 1. Computational details

If there are no special statements, all structures were optimized at B3LYP<sup>S1</sup> level of theory in gas phase with Def2SVP<sup>S2</sup> basis set for all atoms in combination with the corresponding Stuttgart relativistic small-core ECP<sup>S3</sup> basis set for tin. Empirical dispersion correction has been considered by using Grimme's DFT empirical dispersion correction with the Becke-Jonson (D3BJ) damping function.<sup>S4</sup> Optimized minima and transition states (TSs) were verified at the same level of theory by harmonic vibrational analysis to have no and one proper imaginary frequency, respectively. To refine the calculated energy, single point calculation with larger basis set were then done based on these optimized structures, by using MN15 functional<sup>S5</sup> with the Def2TZVPP basis set for all atoms in combination with the corresponding Stuttgart relativistic small-core ECP basis set for tin. The solvent effect was modelled in these single point calculations by employing SMD continuum solvation model,<sup>S6</sup> taking tetrahydrofuran as the solvent for each reaction. The reported free energies in this work were based on the electronic energy of single point calculations, including the Gibbs free energy thermal correction obtained from vibrational analysis in gas phase at 0°C, as well as DFT-D3(BJ) empirical dispersion correction.<sup>S4</sup> The protocol introduced by Martin and coworkers<sup>S7</sup>, which has been proved to be very robust and given reasonable results in a lot of theoretical calculations,<sup>S8</sup> has been used to reduce the overestimation of entropy. These corrections are based on the consideration of a pressure at which the ideal gas density matches that for the solvent used in experiments (in this case, tetrahydrofuran). Martin and coworkers proposed to determine the pressure (from  $P = nRT/V = \rho RT/M$ ) applicable at the concentration of the solvent used from its experimental density. By applying this approximation for the solvent tetrahydrofuran ( $\rho = 889.2 \text{ kg m}^{-3}$ ) with reaction temperature 0°C we obtained a pressure of 276.4 atm, which is

used for adjusting the solvent concentration of the gas-phase entropies. Thus, the pressure 276.4 atm is incorporated then to the calculation of the translational partition function in equation 1, which has been used to calculate the translational entropy  $S_{trans}$  in electronic-structure calculations. All DFT geometry optimizations and single point calculations were performed with Gaussian 09 program.<sup>S9</sup>

$$q_{trans} = \left( \frac{2\pi mRT}{h^2} \right)^{1.5} \frac{RT}{P} \quad \text{eq. 1}$$

CAM-B3LYP/Def2SVP<sup>S10</sup> has been adopted to optimize all the structures for the ECD spectrum calculations in combination with D3 dispersion corrections with Becke-Johnson damping scheme (D3BJ).<sup>S4</sup> Solvent effect was included by using polarizable continuum model<sup>S11</sup> (PCM) with solvent parameters of methanol. CD spectra were calculated by TDDFT at the CAM-B3LYP/Def2SVP level.

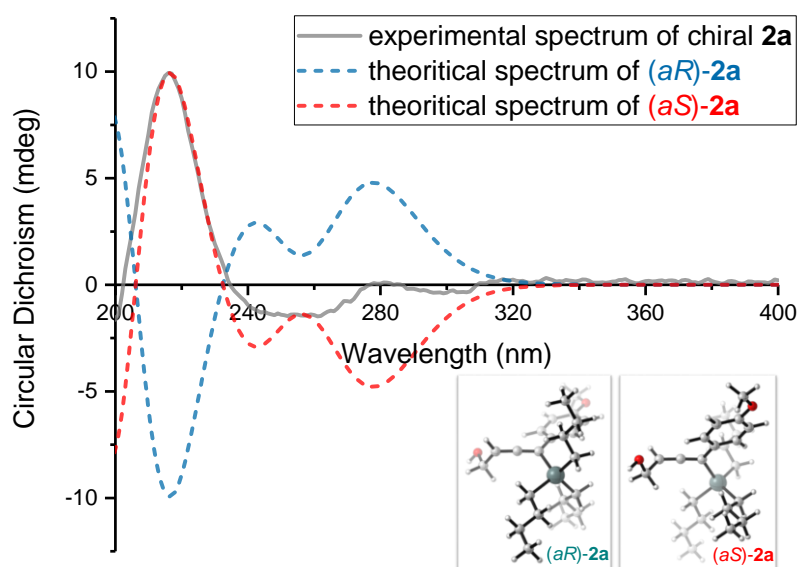

Figure X7. Experimental vs simulated ECD Spectra of chiral-2a.

(S1) (a) Lee, C. T.; Yang, W. T.; Parr, R. G. *Phys. Rev. B* **1988**, *37*, 785–798. (b) Becke, A. D. *J. Chem. Phys.* **1993**, *98*, 5648–5652.

(S2) Weigend, F.; Ahlrichs, R. *Phys. Chem. Chem. Phys.* **2005**, *7*, 3297–3305.

(S3) (a) Andrae, D.; Haeussermann, U.; Dolg, M.; Stoll, H.; Preuss, H. *Theor. Chim. Acta*, **1990**, *77*, 123–141. (b) Eichkorn, K.; Weigend, F.; Treutler, O.; Ahlrichs, R. *Theor. Chem. Acc.* **1997**, *97*, 119–124. (c) Peterson, K. A.; Figgen, D.; Goll, E.; Stoll, H.; Dolg, M. *J. Chem. Phys.* **2003**, *119*, 11113–11123.

(S4) (a) Grimme, S.; Antony, J.; Ehrlich, S.; Krieg, H. *J. Chem. Phys.* **2010**, *132*, 154104; (b) Grimme, S.; Ehrlich, S.; Goerigk, L. *J. Comput. Chem.* **2011**, *32*, 1456–1465.

(S5) Yu, H. S.; He, X.; Li, S. L.; Truhlar, D. G. *Chem. Sci.* **2016**, *7*, 5032–5051.

(S6) Marenich, A. V.; Cramer, C. J.; Truhlar, D. G. *J. Phys. Chem. B* **2009**, *113*, 6378–6396.

(S7) Martin, R. L.; Hay, P. J.; Pratt, L. R. *J. Phys. Chem. A* **1998**, *102*, 3565–3573.

(S8) (a) González Fabra, J.; Castro-Gómez, F.; Sameera, W. M. C.; Nyman, G.; Kleij, A. W.; Bo, C. *Catal. Sci. Technol.* **2019**, *9*, 5433–5440. (b) Maquilón, C.; Limburg, B.; Laserna, V.; Garay-Ruiz, D.; González-Fabra, J.; Bo, C.; Martínez Belmonte, M.; Escudero-Adán, E. C.; Kleij, A. W. *Organometallics* **2020**, *39*, 1642–1651. (c) Qu, S.; Dang, Y.; Song, C.; Wen, M.; Huang, K.-W.; Wang, Z.-X. *J. Am. Chem. Soc.* **2014**, *136*, 4974–4991. (d) Wang, Y.; Ling, B.; Liu, P.; Bi, S. *Organometallics* **2018**, *37*, 3035–3044.

(S9) Frisch, M. J.; Trucks, G. W.; Schlegel, H. B.; Scuseria, G. E.; Robb, M. A.; Cheeseman, J. R.; Scalmani, G.; Barone, V.; Mennucci, B.; Petersson, G. A.; Nakatsuji, H.; Caricato, M.; Li, X.; Hratchian, H. P.; Izmaylov, A. F.; Bloino, J.; Zheng, G.; Sonnenberg, J. L.; Hada, M.; Ehara, M.; Toyota, K.; Fukuda, R.; Hasegawa, J.; Ishida, M.; Nakajima, T.; Honda, Y.; Kitao, O.; Nakai, H.; Vreven, T.; Montgomery, Jr., J. A.; Peralta, J. E.; Ogliaro, F.; Bearpark, M.; Heyd, J. J.; Brothers, E.; Kudin, K. N.; Staroverov, V. N.; Kobayashi, R.; Normand, J.; Raghavachari, K.; Rendell, A.; Burant, J. C.; Iyengar, S. S.; Tomasi, J.; Cossi, M.; Rega, N.; Millam, J. M.; Klene, M.; Knox, J. E.; Cross, J. B.; Bakken, V.; Adamo, C.; Jaramillo, J.; Gomperts, R.; Stratmann, R. E.; Yazyev, O.; Austin, A. J.; Cammi, R.; Pomelli, C.; Ochterski, J. W.; Martin, R. L.; Morokuma, K.; Zakrzewski, V. G.; Voth, G. A.; Salvador, P.; Dannenberg, J. J.; Dapprich, S.; Daniels, A. D.; Farkas, Ö.; Foresman, J. B.; Ortiz, J. V.; Cioslowski, J.; Fox, D. J.; Gaussian, Inc.: Wallingford, CT, 2009.

(S10) (a) Yanai, T.; Tew, D. P.; Handy, N. C. *Chem. Phys. Lett.* **2004**, *393*, 51–57.

(S11) (a) Cancès, E.; Mennucci, B.; Tomasi, J. *J. Chem. Phys.* **1997**, *107*, 3032–3041. (b) Tomasi, J.; Mennucci, B.; Cancès, E. *J. Mol. Struct. (Theochem)* **1999**, *464*, 211–226.

## 2. Cartesian coordinates for the optimized structures

|          |            |            |            |   |            |             |            |
|----------|------------|------------|------------|---|------------|-------------|------------|
| <b>1</b> |            |            |            | C | 6.55344500 | -0.82232900 | 6.10836000 |
| Cu       | 7.78138500 | 4.77353600 | 5.03292000 | C | 7.80924000 | -0.97792400 | 5.54594100 |
| C        | 5.99174000 | 0.46674500 | 6.07126200 | C | 8.49058500 | 0.09835400  | 4.96389800 |

|   |            |             |            |             |             |             |             |
|---|------------|-------------|------------|-------------|-------------|-------------|-------------|
| C | 7.97626900 | 1.38765900  | 4.93192200 | C           | 10.38345500 | -2.58857900 | 3.93213600  |
| C | 6.67673700 | 1.52871600  | 5.48533900 | C           | 10.84313300 | -1.60037700 | 6.22355400  |
| O | 4.92808000 | 3.07991000  | 6.78238000 | C           | 10.68792300 | -3.98691300 | 4.48164600  |
| P | 8.96548200 | 2.88568500  | 4.50577700 | H           | 11.29336100 | -2.13485600 | 3.50613900  |
| B | 7.44654100 | 6.64332900  | 4.39259800 | H           | 9.62095400  | -2.61845600 | 3.13909300  |
| S | 5.91754300 | 3.18129100  | 5.64266900 | C           | 11.14639500 | -3.00007900 | 6.76610500  |
| O | 9.69635500 | -0.33493800 | 4.50523000 | H           | 11.76383500 | -1.10045100 | 5.88171000  |
| O | 8.58112400 | -2.09443100 | 5.47727100 | H           | 10.39692900 | -0.95051500 | 6.99181800  |
| H | 6.03826200 | -1.66008800 | 6.57992200 | C           | 11.66704700 | -3.92431600 | 5.65956900  |
| H | 5.02929200 | 0.67351600  | 6.54265700 | H           | 11.08806200 | -4.62164600 | 3.67543100  |
| C | 4.85638000 | 3.29056900  | 4.05883200 | H           | 9.74367000  | -4.45072900 | 4.81300700  |
| C | 4.13580900 | 4.63204300  | 4.22382900 | H           | 11.87453000 | -2.92989600 | 7.58950000  |
| H | 3.58200100 | 4.66242200  | 5.17297000 | H           | 10.22239800 | -3.42483900 | 7.19321700  |
| H | 3.42048400 | 4.75621600  | 3.39476200 | H           | 11.84415900 | -4.93566700 | 6.05923200  |
| H | 4.85017000 | 5.46650000  | 4.18790700 | H           | 12.64467100 | -3.55184000 | 5.30243900  |
| C | 3.87596700 | 2.12620400  | 4.07058900 | C           | 10.56806500 | 2.45973000  | 5.28736700  |
| H | 4.37581700 | 1.16519200  | 3.88162100 | C           | 11.77038200 | 2.35890000  | 4.57710700  |
| H | 3.12467700 | 2.28076300  | 3.27922900 | C           | 10.56987700 | 2.25983600  | 6.67810300  |
| H | 3.35201700 | 2.07556000  | 5.03665100 | C           | 12.95532700 | 2.03932400  | 5.24682900  |
| C | 5.77202200 | 3.29670200  | 2.84314800 | H           | 11.78109200 | 2.51729400  | 3.49773700  |
| H | 6.45349800 | 4.15948000  | 2.86299500 | C           | 11.75164500 | 1.93247000  | 7.34188900  |
| H | 5.15470000 | 3.39106000  | 1.93442200 | H           | 9.63735900  | 2.35329000  | 7.24171500  |
| H | 6.35478000 | 2.36844200  | 2.75230600 | C           | 12.94885000 | 1.81817300  | 6.62619600  |
| C | 6.93574100 | 8.14597300  | 2.69614900 | H           | 13.88863600 | 1.95984400  | 4.68396300  |
| C | 7.11325700 | 8.90736800  | 4.05729100 | H           | 11.74063700 | 1.77236100  | 8.42269300  |
| O | 7.72833500 | 7.90309500  | 4.89334900 | H           | 13.87612300 | 1.56607800  | 7.14614400  |
| O | 6.84381900 | 6.77377800  | 3.13235100 | C           | 9.26717100  | 2.84419100  | 2.69847800  |
| C | 8.02461300 | 10.12763500 | 3.99772600 | C           | 9.60234900  | 1.67402100  | 1.99589400  |
| H | 7.62789100 | 10.88252800 | 3.30002000 | C           | 9.13446400  | 4.05634200  | 2.00067600  |
| H | 8.09271100 | 10.58625800 | 4.99557100 | C           | 9.80448200  | 1.72289400  | 0.61531900  |
| H | 9.04091700 | 9.85662800  | 3.68417100 | H           | 9.71432000  | 0.72993500  | 2.52910700  |
| C | 5.77932100 | 9.28132600  | 4.71184400 | C           | 9.34243800  | 4.09824700  | 0.61998100  |
| H | 5.97270300 | 9.59929300  | 5.74668800 | H           | 8.84072100  | 4.95986800  | 2.54042000  |
| H | 5.27494900 | 10.10338100 | 4.18134300 | C           | 9.67681400  | 2.93351700  | -0.07455100 |
| H | 5.10234800 | 8.41559500  | 4.74772000 | H           | 10.06313400 | 0.80945400  | 0.07399900  |
| C | 5.67874800 | 8.50434800  | 1.91257400 | H           | 9.23206700  | 5.04624000  | 0.08827500  |
| H | 5.67618600 | 9.57050500  | 1.63492100 | H           | 9.83475000  | 2.96587300  | -1.15541700 |
| H | 5.63790600 | 7.91020000  | 0.98687300 |             |             |             |             |
| H | 4.77020100 | 8.28946500  | 2.48950900 | <b>I-2a</b> |             |             |             |
| C | 8.16583800 | 8.24205600  | 1.78686800 | Cu          | 5.02278300  | 10.04246300 | 9.71829000  |
| H | 8.05631700 | 7.51195700  | 0.97044000 | C           | 3.08352400  | 5.65921400  | 8.80494100  |
| H | 8.27829600 | 9.24330900  | 1.34402900 | C           | 3.68488300  | 4.40279100  | 8.62835100  |
| H | 9.08269100 | 7.99661000  | 2.34197300 | C           | 5.05162600  | 4.39172100  | 8.42730700  |
| C | 9.89576100 | -1.66458600 | 5.03129100 | C           | 5.79953000  | 5.57466400  | 8.37932900  |

|   |            |             |             |   |             |             |             |
|---|------------|-------------|-------------|---|-------------|-------------|-------------|
| C | 5.23672800 | 6.83308000  | 8.56081200  | H | 1.73111300  | 6.03544500  | 11.83901900 |
| C | 3.83069800 | 6.83285000  | 8.75959300  | H | 5.87983800  | 4.91441800  | 12.09387300 |
| O | 1.75755800 | 7.97016900  | 10.01571000 | H | 5.28665500  | 2.54540700  | 11.77366900 |
| P | 6.23327700 | 8.37510900  | 8.69755300  | O | 2.72484000  | 1.66346400  | 11.39980100 |
| B | 4.87542600 | 11.79596000 | 8.71568700  | C | 3.68811100  | 0.64996200  | 11.23004500 |
| S | 2.95084200 | 8.37098400  | 9.16813500  | H | 4.37761600  | 0.87984000  | 10.39695100 |
| O | 7.10355300 | 5.26356300  | 8.13317600  | H | 3.13836000  | -0.27173100 | 10.99751500 |
| O | 5.87702800 | 3.32383900  | 8.25952200  | H | 4.28358000  | 0.48870900  | 12.14689500 |
| H | 3.11142100 | 3.47856000  | 8.69147000  | C | 2.15417200  | 3.92285900  | 11.69961300 |
| H | 2.02233600 | 5.73332100  | 9.03884500  | C | 2.49461400  | 5.25711600  | 11.86463600 |
| C | 2.20675600 | 8.85052000  | 7.48137100  | C | 3.84931100  | 5.64241900  | 11.99278600 |
| C | 1.39781500 | 10.10872000 | 7.81092800  | C | 4.83104600  | 4.63398600  | 11.98237100 |
| H | 0.66307200 | 9.89575200  | 8.60078900  | C | 4.49468500  | 3.29274900  | 11.80347900 |
| H | 0.85222700 | 10.42628200 | 6.90682600  | C | 3.14962100  | 2.93139100  | 11.64001600 |
| H | 2.05001100 | 10.93642400 | 8.12132300  | C | 4.22832700  | 7.00968600  | 12.04536900 |
| C | 1.29485700 | 7.72678700  | 7.00651100  | C | 4.60960300  | 8.16794800  | 11.97442200 |
| H | 1.86039600 | 6.83782300  | 6.69350500  | C | 5.14617100  | 9.47245900  | 11.84907300 |
| H | 0.71318300 | 8.08160300  | 6.14010600  | C | 4.41611900  | 10.63846400 | 11.62681100 |
| H | 0.58889200 | 7.44423900  | 7.80142400  | H | 4.87737500  | 11.60830300 | 11.81477300 |
| C | 3.34678800 | 9.13867700  | 6.51484700  | H | 3.32405500  | 10.60909100 | 11.59247800 |
| H | 4.02866300 | 9.89648200  | 6.92266300  | H | 6.21608300  | 9.56693500  | 12.07452800 |
| H | 2.93161300 | 9.53407600  | 5.57329800  | C | 7.23512400  | 3.84006700  | 8.30838300  |
| H | 3.92148700 | 8.23349000  | 6.27279600  | C | 8.04110900  | 3.24747500  | 7.16876800  |
| C | 5.54300300 | 13.85421900 | 7.87607500  | C | 7.83717100  | 3.54706400  | 9.67796900  |
| C | 4.15273900 | 13.45399700 | 7.26682300  | C | 8.25800800  | 1.74367500  | 7.37334600  |
| O | 3.75321300 | 12.36232800 | 8.12628300  | H | 9.00590000  | 3.77975400  | 7.14171900  |
| O | 5.97873400 | 12.61249800 | 8.47652500  | H | 7.51642400  | 3.45857100  | 6.22469600  |
| C | 3.08675400 | 14.54102100 | 7.32065200  | C | 8.04937800  | 2.04431400  | 9.87832400  |
| H | 3.40019800 | 15.42854700 | 6.74827400  | H | 8.79157000  | 4.09375500  | 9.74043200  |
| H | 2.15134200 | 14.16409300 | 6.88043800  | H | 7.17315300  | 3.97210400  | 10.44379000 |
| H | 2.87326500 | 14.84484600 | 8.35322300  | C | 8.88517900  | 1.44658300  | 8.74058300  |
| C | 4.25731300 | 12.88913900 | 5.84641100  | H | 8.88836100  | 1.34628100  | 6.56228100  |
| H | 3.29329400 | 12.43467700 | 5.57490100  | H | 7.28323600  | 1.23290200  | 7.29823200  |
| H | 4.49129300 | 13.67207900 | 5.10931700  | H | 8.53041500  | 1.86161400  | 10.85238000 |
| H | 5.02605000 | 12.10581000 | 5.78557400  | H | 7.06517100  | 1.54633700  | 9.91030800  |
| C | 6.58547300 | 14.30321600 | 6.85933400  | H | 8.99691700  | 0.35899200  | 8.87811800  |
| H | 6.25248100 | 15.20841100 | 6.32729600  | H | 9.90391400  | 1.87398400  | 8.77545800  |
| H | 7.52890400 | 14.53698800 | 7.37506300  | C | 7.77891300  | 7.77146600  | 9.49308300  |
| H | 6.79003600 | 13.51942400 | 6.11879300  | C | 9.03242600  | 7.87526500  | 8.87652500  |
| C | 5.43228000 | 14.88325500 | 9.00442000  | C | 7.68710400  | 7.20316700  | 10.77402300 |
| H | 6.40052600 | 14.94446300 | 9.52264100  | C | 10.17637600 | 7.40399200  | 9.52701400  |
| H | 5.17546800 | 15.88408900 | 8.62560800  | H | 9.11703300  | 8.31052100  | 7.87995100  |
| H | 4.67334000 | 14.57970800 | 9.73970300  | C | 8.82974400  | 6.72517400  | 11.41539100 |
| H | 1.11358500 | 3.61710300  | 11.57506200 | H | 6.71500800  | 7.12179500  | 11.26229100 |

|             |             |             |             |   |            |             |             |
|-------------|-------------|-------------|-------------|---|------------|-------------|-------------|
| C           | 10.07929900 | 6.82252900  | 10.79367800 | H | 4.03041700 | 8.03435200  | 6.10987300  |
| H           | 11.14899900 | 7.48816300  | 9.03584600  | C | 4.92905800 | 14.15475100 | 8.51182900  |
| H           | 8.74320500  | 6.27749600  | 12.40870200 | C | 4.99149200 | 13.60830600 | 7.04103800  |
| H           | 10.97502600 | 6.45236300  | 11.29838100 | O | 4.72301700 | 12.20323300 | 7.23074600  |
| C           | 6.76524600  | 8.75427700  | 6.98233100  | O | 5.28580000 | 12.98837300 | 9.28451500  |
| C           | 7.12202700  | 10.08078300 | 6.69254600  | C | 3.95057700 | 14.18833200 | 6.09101500  |
| C           | 6.83095700  | 7.78483100  | 5.97018200  | H | 4.07312700 | 15.27827400 | 5.98713500  |
| C           | 7.54294700  | 10.42714000 | 5.40570000  | H | 4.06626400 | 13.73482900 | 5.09485900  |
| H           | 7.05091500  | 10.85089000 | 7.46305000  | H | 2.93003300 | 13.98066100 | 6.43713800  |
| C           | 7.23874400  | 8.14009400  | 4.68263600  | C | 6.38710100 | 13.71619900 | 6.41740000  |
| H           | 6.57020900  | 6.74900500  | 6.18545500  | H | 6.40269200 | 13.12555100 | 5.48910000  |
| C           | 7.59582200  | 9.46150400  | 4.39711900  | H | 6.65248100 | 14.75544000 | 6.17101200  |
| H           | 7.82082100  | 11.46184700 | 5.19099500  | H | 7.15184200 | 13.30760500 | 7.09355100  |
| H           | 7.27848600  | 7.37989700  | 3.89867200  | C | 5.91151300 | 15.27729600 | 8.82386000  |
| H           | 7.91378000  | 9.73727200  | 3.38868500  | H | 5.72118600 | 16.15682100 | 8.18811500  |
|             |             |             |             | H | 5.79932500 | 15.58498800 | 9.87443800  |
|             |             |             |             | H | 6.95064500 | 14.95530000 | 8.67838100  |
| <b>I-2b</b> |             |             |             | C | 3.51518200 | 14.56181500 | 8.93970800  |
| Cu          | 5.08365400  | 9.93742500  | 9.22831400  | H | 3.50753700 | 14.71492300 | 10.02887900 |
| C           | 2.99292900  | 5.72291000  | 8.86221400  | H | 3.18827000 | 15.49382800 | 8.45397000  |
| C           | 3.47840000  | 4.40643800  | 8.77926400  | H | 2.79002600 | 13.76883300 | 8.70651300  |
| C           | 4.82978000  | 4.25344900  | 8.53083500  | H | 1.31957500 | 3.50546400  | 11.92856700 |
| C           | 5.67129200  | 5.35524400  | 8.34274600  | H | 1.87344300 | 5.94562300  | 12.08897100 |
| C           | 5.22882500  | 6.66804500  | 8.43468600  | H | 6.06792900 | 4.97415200  | 11.97767100 |
| C           | 3.83883500  | 6.81353000  | 8.68157800  | H | 5.52690800 | 2.57848400  | 11.78189900 |
| O           | 1.94652700  | 8.28477900  | 9.88666800  | O | 2.98086300 | 1.60640300  | 11.64919600 |
| P           | 6.33673100  | 8.14340000  | 8.46802600  | C | 3.95488500 | 0.63649400  | 11.33330100 |
| B           | 5.02739100  | 11.83713200 | 8.54508700  | H | 4.51443300 | 0.91443800  | 10.42225400 |
| S           | 3.13339000  | 8.47024500  | 8.96292100  | H | 3.41620000 | -0.30359600 | 11.15588500 |
| O           | 6.93548000  | 4.91347900  | 8.08975300  | H | 4.67184600 | 0.48545800  | 12.16022900 |
| O           | 5.55544300  | 3.10477900  | 8.45197300  | C | 2.35547500 | 3.84892700  | 11.95024600 |
| H           | 2.83265600  | 3.54592700  | 8.94997400  | C | 2.66503500 | 5.19586800  | 12.04927800 |
| H           | 1.95247000  | 5.91156500  | 9.12684800  | C | 4.01154800 | 5.63110900  | 12.04368300 |
| C           | 2.38203300  | 8.89339900  | 7.26633000  | C | 5.02409900 | 4.65804100  | 11.97207800 |
| C           | 1.72604200  | 10.25585600 | 7.50989100  | C | 4.71786000 | 3.30236300  | 11.86084600 |
| H           | 1.00205000  | 10.19785900 | 8.33518600  | C | 3.37795000 | 2.89123200  | 11.82438800 |
| H           | 1.19353700  | 10.56323000 | 6.59543300  | C | 4.30305800 | 7.02061600  | 12.02746300 |
| H           | 2.48420200  | 11.01814400 | 7.73679800  | C | 4.49465400 | 8.21984400  | 11.90777900 |
| C           | 1.34262500  | 7.83422500  | 6.92276800  | C | 4.57565300 | 9.61780400  | 11.69594000 |
| H           | 1.80612600  | 6.86998700  | 6.67017000  | C | 5.70809300 | 10.34686200 | 11.48927300 |
| H           | 0.76319500  | 8.17195900  | 6.04836700  | H | 5.65840300 | 11.43149600 | 11.38870800 |
| H           | 0.64666200  | 7.69117400  | 7.76256400  | H | 6.69617500 | 9.88009600  | 11.52861100 |
| C           | 3.50284600  | 8.99030800  | 6.24165700  | H | 3.60727000 | 10.13327200 | 11.69230100 |
| H           | 4.22423800  | 9.77183200  | 6.51529000  | C | 6.95058400 | 3.48934100  | 8.30306900  |
| H           | 3.06876200  | 9.26874100  | 5.26716700  |   |            |             |             |

|             |             |             |             |   |             |            |             |
|-------------|-------------|-------------|-------------|---|-------------|------------|-------------|
| C           | 7.53489500  | 2.78908300  | 7.08854000  | C | 5.77689200  | 6.14991100 | 7.95013400  |
| C           | 7.71317600  | 3.18202500  | 9.58550000  | C | 4.60023900  | 5.62368400 | 8.54949100  |
| C           | 7.64886400  | 1.27896600  | 7.32538300  | O | 3.26858800  | 5.41025600 | 10.85982800 |
| H           | 8.52927200  | 3.22838900  | 6.90565000  | P | 6.69785500  | 7.55784600 | 8.71615400  |
| H           | 6.90276800  | 3.01803400  | 6.21704000  | B | 5.48127000  | 8.93122200 | 13.18846900 |
| C           | 7.83409600  | 1.67383600  | 9.81841000  | S | 3.83482200  | 6.48793300 | 9.95021600  |
| H           | 8.70825100  | 3.64518300  | 9.48762000  | O | 7.40590800  | 5.63099100 | 6.17801100  |
| H           | 7.20740900  | 3.69022700  | 10.41738900 | O | 6.49782500  | 3.62203800 | 5.52419000  |
| C           | 8.44289800  | 0.97022100  | 8.60001900  | H | 4.22567600  | 2.65950500 | 6.85756900  |
| H           | 8.11655600  | 0.80021200  | 6.45071600  | H | 3.20971800  | 4.00757200 | 8.74777300  |
| H           | 6.63344400  | 0.85716500  | 7.41369500  | C | 2.34022400  | 7.33464800 | 9.14002500  |
| H           | 8.43743700  | 1.48330100  | 10.72018600 | C | 1.75071900  | 8.13446100 | 10.30647000 |
| H           | 6.83119300  | 1.25870500  | 10.01477900 | H | 1.45458000  | 7.46533300 | 11.12733400 |
| H           | 8.48365300  | -0.11801600 | 8.76802900  | H | 0.85985900  | 8.68283000 | 9.96139700  |
| H           | 9.48743400  | 1.30721200  | 8.47004500  | H | 2.48367800  | 8.86078600 | 10.69008600 |
| C           | 7.82191000  | 7.47659500  | 9.32022200  | C | 1.36893200  | 6.27474800 | 8.64211300  |
| C           | 9.08526500  | 7.39799700  | 8.71948100  | H | 1.74518300  | 5.76336500 | 7.74483800  |
| C           | 7.67021800  | 7.06256100  | 10.65394500 | H | 0.41110900  | 6.75390800 | 8.38227600  |
| C           | 10.17199100 | 6.88349900  | 9.43273800  | H | 1.18055200  | 5.52991200 | 9.42969600  |
| H           | 9.22069300  | 7.72399900  | 7.68749100  | C | 2.85887300  | 8.24957000 | 8.03823900  |
| C           | 8.75408100  | 6.53924100  | 11.35928000 | H | 3.61081700  | 8.94776300 | 8.43619600  |
| H           | 6.69551000  | 7.14633400  | 11.13665600 | H | 2.02308700  | 8.84493000 | 7.63615500  |
| C           | 10.00941600 | 6.44321500  | 10.74892500 | H | 3.30716300  | 7.68463400 | 7.20792200  |
| H           | 11.15192900 | 6.82319200  | 8.95254100  | C | 5.98113700  | 6.67938700 | 13.28929000 |
| H           | 8.61908700  | 6.21444000  | 12.39424800 | C | 6.91528000  | 7.50659500 | 14.24350800 |
| H           | 10.86044200 | 6.03830300  | 11.30196200 | O | 6.22743500  | 8.78701500 | 14.31984200 |
| C           | 6.88693100  | 8.37285700  | 6.72997400  | O | 5.42916500  | 7.74317100 | 12.46870300 |
| C           | 6.95970100  | 9.68512800  | 6.23921200  | C | 7.05646500  | 6.93777500 | 15.64633900 |
| C           | 7.21915800  | 7.30023300  | 5.88469800  | H | 7.50032900  | 5.93072800 | 15.61125200 |
| C           | 7.36959600  | 9.92282300  | 4.92468400  | H | 7.71631100  | 7.58346800 | 16.24447500 |
| H           | 6.65469600  | 10.51432500 | 6.87983600  | H | 6.08621200  | 6.87736000 | 16.15575500 |
| C           | 7.62093900  | 7.54319900  | 4.57004900  | C | 8.28669800  | 7.78414600 | 13.62208700 |
| H           | 7.17722200  | 6.27707800  | 6.25854000  | H | 8.80349800  | 8.54380800 | 14.22625700 |
| C           | 7.69902400  | 8.85452700  | 4.08779200  | H | 8.90929500  | 6.87814300 | 13.59111200 |
| H           | 7.41710000  | 10.94927300 | 4.55366700  | H | 8.18760400  | 8.17532900 | 12.59904400 |
| H           | 7.87504700  | 6.70399800  | 3.91761000  | C | 6.68362900  | 5.68505300 | 12.37969500 |
| H           | 8.01229300  | 9.04062800  | 3.05744200  | H | 7.19466000  | 4.91000300 | 12.97118100 |
|             |             |             |             | H | 5.93464400  | 5.19120800 | 11.74276700 |
| <b>I-3a</b> |             |             |             | H | 7.42269800  | 6.17619100 | 11.73720200 |
| Cu          | 5.39236000  | 8.36500300  | 10.37318800 | C | 4.79725300  | 6.01565900 | 13.99166300 |
| C           | 4.05942400  | 4.39187300  | 8.18246600  | H | 4.08576900  | 5.68522300 | 13.22043500 |
| C           | 4.62795500  | 3.63178600  | 7.14437800  | H | 5.11787500  | 5.14273900 | 14.57936500 |
| C           | 5.74388600  | 4.15988700  | 6.51735700  | H | 4.28680400  | 6.72091600 | 14.66418600 |
| C           | 6.29370900  | 5.38713400  | 6.91159100  | H | 12.09395300 | 9.81259100 | 11.22699000 |

|   |             |             |             |             |             |             |             |
|---|-------------|-------------|-------------|-------------|-------------|-------------|-------------|
| H | 9.75066500  | 10.10139800 | 12.02724900 | C           | 8.87118200  | 3.71182600  | 6.07036100  |
| H | 8.60501500  | 11.46033600 | 8.09900200  | C           | 7.95675500  | 4.80799500  | 3.97493600  |
| H | 10.91201000 | 11.17869400 | 7.31208800  | C           | 10.14489900 | 4.55619600  | 5.96355100  |
| O | 12.95364400 | 10.19113200 | 8.86682400  | H           | 8.99568900  | 2.74436200  | 5.55655700  |
| C | 13.35010200 | 10.45151900 | 7.54415500  | H           | 8.61918700  | 3.50321700  | 7.12075100  |
| H | 12.77439700 | 9.85111700  | 6.81484500  | C           | 9.24061900  | 5.63891500  | 3.85438600  |
| H | 13.23757700 | 11.51956700 | 7.28160600  | H           | 8.04396200  | 3.87234400  | 3.39889400  |
| H | 14.41148000 | 10.17761600 | 7.47071800  | H           | 7.08138600  | 5.35514800  | 3.59387400  |
| C | 11.31497100 | 10.17933100 | 10.55542100 | C           | 10.43663800 | 4.93444700  | 4.50679700  |
| C | 10.00979800 | 10.34334800 | 10.99531900 | H           | 10.99230200 | 4.00602100  | 6.40076600  |
| C | 8.98605000  | 10.78661200 | 10.11878000 | H           | 10.01999500 | 5.46515700  | 6.57395300  |
| C | 9.36535500  | 11.11193000 | 8.79794800  | H           | 9.44539000  | 5.84766400  | 2.79257100  |
| C | 10.67812300 | 10.94383900 | 8.35038400  | H           | 9.07576800  | 6.61457900  | 4.34031900  |
| C | 11.66055900 | 10.45473300 | 9.22238200  | H           | 11.32889500 | 5.57873700  | 4.45251300  |
| C | 7.63041700  | 10.81412000 | 10.53055000 | H           | 10.67581700 | 4.01999400  | 3.93351800  |
| C | 6.44150800  | 10.63143600 | 10.79285000 |             |             |             |             |
| C | 5.09143500  | 10.29635800 | 11.08952900 | <b>I-3b</b> |             |             |             |
| C | 4.76605800  | 10.19138800 | 12.60108300 | Cu          | 3.12229200  | 8.64430500  | 9.20722500  |
| H | 3.67795000  | 10.03039200 | 12.71797900 | C           | 1.85111700  | 6.07597900  | 5.56422200  |
| H | 5.01250500  | 11.11137900 | 13.16226400 | C           | 2.30857400  | 4.85299600  | 5.03882200  |
| H | 4.37015400  | 10.91766900 | 10.53603500 | C           | 3.50920700  | 4.36701300  | 5.52865600  |
| C | 8.33158600  | 6.76202700  | 9.00120200  | C           | 4.22499500  | 5.04442400  | 6.52494900  |
| C | 9.51211300  | 7.52042700  | 8.96550700  | C           | 3.79013400  | 6.23843400  | 7.08241800  |
| C | 8.40359900  | 5.40800500  | 9.37133200  | C           | 2.58780900  | 6.75607200  | 6.53032900  |
| C | 10.74289500 | 6.92781800  | 9.26199200  | O           | 0.42156800  | 8.28558300  | 6.93538100  |
| H | 9.47915600  | 8.57665800  | 8.70496100  | P           | 4.49328600  | 6.94923100  | 8.63038900  |
| C | 9.63324800  | 4.82100500  | 9.67223500  | B           | 3.32274100  | 11.38912200 | 10.33410400 |
| H | 7.49511800  | 4.80516900  | 9.42208600  | S           | 1.91996100  | 8.34048600  | 7.12524500  |
| C | 10.80858500 | 5.57723400  | 9.61238800  | O           | 5.33877400  | 4.33689000  | 6.83878900  |
| H | 11.64751700 | 7.53791600  | 9.22209800  | O           | 4.15990800  | 3.22188500  | 5.20322200  |
| H | 9.67271200  | 3.76569500  | 9.95362300  | H           | 1.74089600  | 4.30179600  | 4.28824200  |
| H | 11.77117100 | 5.11531800  | 9.84425500  | H           | 0.89658700  | 6.49961100  | 5.24769200  |
| C | 6.99181700  | 8.78032700  | 7.37706800  | C           | 2.56601600  | 9.54246400  | 5.79452800  |
| C | 6.22600100  | 9.95538200  | 7.40891300  | C           | 2.20413100  | 10.90644200 | 6.39084000  |
| C | 7.95216100  | 8.61482400  | 6.36688900  | H           | 1.11962700  | 10.97646100 | 6.56085400  |
| C | 6.39654900  | 10.93747400 | 6.43054000  | H           | 2.49841000  | 11.70647300 | 5.69243100  |
| H | 5.52087000  | 10.11007600 | 8.22653600  | H           | 2.72090400  | 11.06749200 | 7.34717900  |
| C | 8.13145900  | 9.60397100  | 5.39957000  | C           | 1.81307200  | 9.28270300  | 4.49893200  |
| H | 8.56227300  | 7.71460200  | 6.34390200  | H           | 2.12318900  | 8.33779300  | 4.03013600  |
| C | 7.35017400  | 10.76430700 | 5.42448500  | H           | 2.01883400  | 10.09907200 | 3.78721700  |
| H | 5.79742100  | 11.84993200 | 6.47077800  | H           | 0.73027300  | 9.24698300  | 4.68834600  |
| H | 8.88633000  | 9.46770200  | 4.62099400  | C           | 4.06953200  | 9.34772300  | 5.66759100  |
| H | 7.49341100  | 11.53767200 | 4.66581000  | H           | 4.55158000  | 9.33626500  | 6.65436800  |
| C | 7.69410100  | 4.42797200  | 5.41953900  | H           | 4.50639100  | 10.18053300 | 5.09311000  |



|   |             |             |             |             |             |             |             |
|---|-------------|-------------|-------------|-------------|-------------|-------------|-------------|
| H | 4.31150000  | 8.41013400  | 5.14849000  | C           | 5.33286700  | 4.52375000  | 9.90146800  |
| C | 4.95829500  | 12.88564700 | 9.78392600  | C           | 3.14046800  | 5.39215500  | 10.46852900 |
| C | 5.36134100  | 11.45233300 | 9.28658400  | C           | 5.11347000  | 3.43291200  | 10.74487700 |
| O | 4.07083800  | 10.77352700 | 9.33026900  | H           | 6.27345800  | 4.61280500  | 9.35877400  |
| O | 3.85637000  | 12.59690200 | 10.67823100 | C           | 2.92006400  | 4.29380400  | 11.30109300 |
| C | 5.93963700  | 11.39752800 | 7.88281200  | H           | 2.38795300  | 6.17950700  | 10.37843300 |
| H | 6.84401700  | 12.02263200 | 7.82683800  | C           | 3.90651800  | 3.31201700  | 11.44037600 |
| H | 6.23269400  | 10.36667600 | 7.63711500  | H           | 5.89244000  | 2.67573900  | 10.86373500 |
| H | 5.22584500  | 11.74857900 | 7.12821100  | H           | 1.98315700  | 4.21520200  | 11.85703000 |
| C | 6.27028500  | 10.71442900 | 10.26481200 | H           | 3.73953300  | 2.45889600  | 12.10240200 |
| H | 6.28874200  | 9.65098100  | 9.99893700  | C           | 6.28300200  | 7.14488600  | 8.33865900  |
| H | 7.29979600  | 11.09926900 | 10.23368900 | C           | 6.82306000  | 7.30270000  | 7.05373900  |
| H | 5.88633500  | 10.79017100 | 11.28968200 | C           | 7.12307000  | 7.27160400  | 9.45978200  |
| C | 6.04445400  | 13.61420900 | 10.56293700 | C           | 8.18112500  | 7.58914200  | 6.89246800  |
| H | 6.94104200  | 13.75681300 | 9.93986900  | H           | 6.18329100  | 7.19461700  | 6.17658300  |
| H | 5.67864400  | 14.60504400 | 10.87010200 | C           | 8.48054600  | 7.54656000  | 9.29223600  |
| H | 6.32696800  | 13.06203000 | 11.46786700 | H           | 6.71910000  | 7.15903600  | 10.46677100 |
| C | 4.41322100  | 13.77385600 | 8.66324800  | C           | 9.01302100  | 7.71186000  | 8.00955100  |
| H | 3.93782100  | 14.65837900 | 9.11113900  | H           | 8.59229600  | 7.70926700  | 5.88706000  |
| H | 5.21362900  | 14.11252400 | 7.98909300  | H           | 9.11508400  | 7.63735400  | 10.17659800 |
| H | 3.65479100  | 13.24447400 | 8.06850500  | H           | 10.07527100 | 7.93234400  | 7.87954500  |
| H | 7.06075900  | 4.61901200  | 13.21062700 | C           | 5.25037800  | 3.06804800  | 6.15463000  |
| H | 4.87325800  | 5.68261000  | 12.70274900 | C           | 6.53971100  | 2.79711600  | 5.40178800  |
| H | 6.73793200  | 9.56292800  | 12.90749600 | C           | 4.89778600  | 1.97086500  | 7.15081300  |
| H | 8.89915900  | 8.51374700  | 13.40169400 | C           | 6.50518000  | 1.42094100  | 4.72742000  |
| O | 9.28635600  | 5.79994500  | 13.57297700 | H           | 7.36152900  | 2.85029300  | 6.13441000  |
| C | 10.46629100 | 6.53260900  | 13.77739100 | H           | 6.69322600  | 3.60699300  | 4.67260400  |
| H | 10.73663000 | 7.13955500  | 12.89232400 | C           | 4.86335200  | 0.59902500  | 6.47009200  |
| H | 11.26629000 | 5.80273600  | 13.96291900 | H           | 5.66094800  | 1.99322800  | 7.94513300  |
| H | 10.39000000 | 7.20783200  | 14.64990900 | H           | 3.93609000  | 2.22028500  | 7.62513300  |
| C | 6.97384400  | 5.70494000  | 13.13907200 | C           | 6.17703100  | 0.31196600  | 5.73386600  |
| C | 5.75442100  | 6.30327400  | 12.85915500 | H           | 7.47062500  | 1.22631700  | 4.23443600  |
| C | 5.63023200  | 7.71261000  | 12.73641000 | H           | 5.73932900  | 1.43451700  | 3.93377500  |
| C | 6.79644000  | 8.47580000  | 12.96472300 | H           | 4.65774000  | -0.18195700 | 7.21886800  |
| C | 8.02831100  | 7.87701800  | 13.24400400 | H           | 4.02743200  | 0.57885400  | 5.75091400  |
| C | 8.13052000  | 6.48122600  | 13.32252700 | H           | 6.12148200  | -0.66128900 | 5.22044100  |
| C | 4.40517100  | 8.29854400  | 12.32471900 | H           | 6.99801000  | 0.23221500  | 6.46984300  |
| C | 3.38728900  | 8.70323700  | 11.76037900 |             |             |             |             |
| C | 2.27573300  | 9.16139700  | 10.99876700 | <b>I-4a</b> |             |             |             |
| C | 2.07061200  | 10.69008100 | 10.95146000 | Cu          | 6.31960500  | 8.47111700  | 9.95043800  |
| H | 1.20167800  | 10.91726400 | 10.30494800 | C           | 3.87773100  | 4.68898100  | 8.42353800  |
| H | 1.83773000  | 11.13785300 | 11.93801400 | C           | 4.17975600  | 3.65816900  | 7.51481400  |
| H | 1.35028400  | 8.60907900  | 11.22120200 | C           | 5.30916100  | 3.81956200  | 6.72924200  |
| C | 4.34362800  | 5.50566400  | 9.75526400  | C           | 6.11522400  | 4.95891700  | 6.83680400  |

|   |             |            |             |   |             |             |             |
|---|-------------|------------|-------------|---|-------------|-------------|-------------|
| C | 5.85350900  | 5.98825200 | 7.73011500  | H | 9.03634800  | 8.95654500  | 9.79181400  |
| C | 4.67999300  | 5.82494800 | 8.51427600  | H | 7.71282800  | 12.71408800 | 11.39934600 |
| O | 3.44356200  | 6.22085400 | 10.82886200 | H | 9.99320300  | 13.62430600 | 11.18865700 |
| P | 7.03487500  | 7.33028000 | 8.13299100  | O | 12.12224500 | 12.20088500 | 10.20788300 |
| B | 5.62351300  | 8.82166600 | 13.61514600 | C | 12.47081500 | 13.50541200 | 10.59771300 |
| S | 4.26394100  | 7.01486100 | 9.83319800  | H | 11.91472500 | 14.27122900 | 10.02567600 |
| O | 7.15593900  | 4.85408100 | 5.97260800  | H | 12.29151700 | 13.67717600 | 11.67512600 |
| O | 5.83532900  | 2.97634700 | 5.80304400  | H | 13.54423100 | 13.62090400 | 10.39378000 |
| H | 3.56640900  | 2.75911600 | 7.44380200  | C | 10.54084600 | 10.47598900 | 9.98043800  |
| H | 3.03407300  | 4.59931000 | 9.10965700  | C | 9.24650500  | 9.98314300  | 10.09898500 |
| C | 3.04863600  | 8.18960500 | 8.97595400  | C | 8.19088000  | 10.76466900 | 10.61671800 |
| C | 2.61528200  | 9.10309800 | 10.12661100 | C | 8.50848300  | 12.08072500 | 10.99893000 |
| H | 2.10976200  | 8.52372800 | 10.91171900 | C | 9.80112200  | 12.59629900 | 10.88032000 |
| H | 1.91556200  | 9.86107800 | 9.73943200  | C | 10.83185300 | 11.79267100 | 10.36796900 |
| H | 3.47331900  | 9.62281300 | 10.58066300 | C | 6.82878100  | 10.20736400 | 10.72695300 |
| C | 1.87948900  | 7.38436200 | 8.42764900  | C | 5.88514700  | 10.68429100 | 11.49948800 |
| H | 2.16984600  | 6.77456000 | 7.55987500  | C | 4.90202100  | 10.92483400 | 12.35260100 |
| H | 1.08298000  | 8.07595700 | 8.10848600  | C | 4.76282800  | 10.13713700 | 13.64849900 |
| H | 1.46869200  | 6.72668100 | 9.20802200  | H | 3.70138700  | 9.85040900  | 13.77897700 |
| C | 3.80872200  | 8.95570900 | 7.90058700  | H | 5.02557600  | 10.74633700 | 14.53256900 |
| H | 4.66955700  | 9.49639700 | 8.32638600  | H | 4.13696300  | 11.67720100 | 12.11973000 |
| H | 3.13815800  | 9.70582200 | 7.45097800  | C | 8.63782700  | 6.44962000  | 8.20015600  |
| H | 4.16525600  | 8.29991300 | 7.09265000  | C | 9.80099000  | 7.01964300  | 7.66245100  |
| C | 6.23994200  | 6.68792900 | 13.08518300 | C | 8.73166100  | 5.24925800  | 8.92455400  |
| C | 7.30010200  | 7.34101500 | 14.04656200 | C | 11.03723100 | 6.39157200  | 7.83968900  |
| O | 6.59079700  | 8.50563100 | 14.53194400 | H | 9.74178200  | 7.95691500  | 7.10632300  |
| O | 5.47862100  | 7.84097100 | 12.65801500 | C | 9.96663400  | 4.62350900  | 9.09360700  |
| C | 7.70269700  | 6.47578700 | 15.23218600 | H | 7.83329900  | 4.80032500  | 9.35366300  |
| H | 8.16904600  | 5.53909600 | 14.88856000 | C | 11.12444500 | 5.19360400  | 8.55309700  |
| H | 8.43433200  | 7.01475400 | 15.85233300 | H | 11.93684200 | 6.84399400  | 7.41576600  |
| H | 6.83916600  | 6.22828100 | 15.86286800 | H | 10.02653100 | 3.68690100  | 9.65324500  |
| C | 8.53748500  | 7.85456100 | 13.30474100 | H | 12.09172000 | 4.70482800  | 8.68953500  |
| H | 9.12239100  | 8.48865800 | 13.98649600 | C | 7.16435500  | 8.44531200  | 6.68827500  |
| H | 9.17965400  | 7.03046700 | 12.96020600 | C | 7.30932600  | 9.81608000  | 6.95941500  |
| H | 8.25444600  | 8.46941400 | 12.43947000 | C | 7.14401000  | 7.99795300  | 5.35662200  |
| C | 6.84462600  | 5.99085400 | 11.87232900 | C | 7.44033900  | 10.72766900 | 5.90839600  |
| H | 7.55946600  | 5.21553500 | 12.18805700 | H | 7.31633800  | 10.16403600 | 7.99487100  |
| H | 6.04996000  | 5.50335900 | 11.29075700 | C | 7.26345400  | 8.91623900  | 4.31215500  |
| H | 7.37941100  | 6.70042200 | 11.22420000 | H | 7.04703700  | 6.93486600  | 5.13872300  |
| C | 5.25614700  | 5.74782600 | 13.78413500 | C | 7.41409600  | 10.28048200 | 4.58553100  |
| H | 4.42899300  | 5.55525400 | 13.08607600 | H | 7.55841700  | 11.79062700 | 6.13035600  |
| H | 5.72984000  | 4.79387500 | 14.06122700 | H | 7.24289800  | 8.56433700  | 3.27772100  |
| H | 4.84401300  | 6.21062200 | 14.69287200 | H | 7.51080300  | 10.99461500 | 3.76403800  |
| H | 11.34899600 | 9.85670200 | 9.58563700  | C | 7.12887400  | 3.50555200  | 5.43231400  |

|              |             |             |             |   |             |             |             |
|--------------|-------------|-------------|-------------|---|-------------|-------------|-------------|
| C            | 8.24091500  | 2.69776900  | 6.08934300  | H | 2.38399900  | 7.23047100  | 7.46734400  |
| C            | 7.25941000  | 3.57935000  | 3.92279000  | C | 4.19733300  | 12.23867800 | 9.17712800  |
| C            | 9.61582200  | 3.24065400  | 5.68558900  | C | 3.49259900  | 12.01074000 | 10.57126700 |
| H            | 8.12126600  | 1.64894200  | 5.77145600  | O | 4.61158700  | 11.70477800 | 11.43223600 |
| H            | 8.10206900  | 2.73337600  | 7.18089400  | O | 5.40516100  | 11.46117300 | 9.31396900  |
| C            | 8.63953900  | 4.11336200  | 3.51942000  | C | 2.76619800  | 13.22794800 | 11.13073600 |
| H            | 7.10752300  | 2.56110500  | 3.52916700  | H | 1.95090600  | 13.53915100 | 10.45849800 |
| H            | 6.44569300  | 4.21000100  | 3.53324200  | H | 2.32616900  | 12.96940400 | 12.10508700 |
| C            | 9.76635500  | 3.29564100  | 4.16147400  | H | 3.44640100  | 14.07689800 | 11.27974600 |
| H            | 10.40609500 | 2.61898800  | 6.13428400  | C | 2.56622700  | 10.79637100 | 10.57465200 |
| H            | 9.73515700  | 4.25074100  | 6.10768500  | H | 2.22302300  | 10.60185100 | 11.59847600 |
| H            | 8.73040600  | 4.10806400  | 2.42185600  | H | 1.68639600  | 10.95561700 | 9.93496400  |
| H            | 8.72342900  | 5.16533900  | 3.84046700  | H | 3.09674900  | 9.89583300  | 10.23991400 |
| H            | 10.74455500 | 3.72513500  | 3.89233100  | C | 3.41251500  | 11.72505200 | 7.97573100  |
| H            | 9.75068500  | 2.26884600  | 3.75209700  | H | 2.43675500  | 12.23078200 | 7.90390800  |
|              |             |             |             | H | 3.97215700  | 11.92402800 | 7.04959400  |
|              |             |             |             | H | 3.24855100  | 10.64320600 | 8.03880400  |
| <b>I-4a'</b> |             |             |             | C | 4.62864400  | 13.68970100 | 8.94608700  |
| Cu           | 4.44987400  | 6.18470600  | 10.75669600 | H | 5.28873000  | 13.72811000 | 8.06660400  |
| C            | 1.30607600  | 3.58755000  | 8.26109900  | H | 3.76556300  | 14.34746600 | 8.76344100  |
| C            | 1.51631300  | 2.67846100  | 7.20908600  | H | 5.18899900  | 14.07812500 | 9.80899200  |
| C            | 2.71119500  | 2.78865000  | 6.52170900  | H | 2.10671400  | 10.45910200 | 14.97871700 |
| C            | 3.66765100  | 3.74923800  | 6.86801700  | H | 3.97153300  | 10.08398100 | 13.35209800 |
| C            | 3.51228400  | 4.63792900  | 7.92425500  | H | 2.62837900  | 6.03863400  | 12.77531000 |
| C            | 2.26112900  | 4.54524000  | 8.59070100  | H | 0.79022900  | 6.39758300  | 14.34935400 |
| O            | 0.69209800  | 4.89706700  | 10.72328700 | O | 0.32153900  | 8.77472200  | 15.65919200 |
| P            | 4.90051400  | 5.65520700  | 8.61191400  | C | -0.61919000 | 7.78101300  | 15.96147000 |
| B            | 5.64004500  | 11.23810400 | 10.65322400 | H | -1.17346400 | 7.44386400  | 15.06493900 |
| S            | 1.85244800  | 5.59124000  | 10.03562900 | H | -1.33198300 | 8.22121200  | 16.67451500 |
| O            | 4.72949900  | 3.63714600  | 6.01185000  | H | -0.15336100 | 6.89180600  | 16.42717400 |
| O            | 3.17060900  | 2.04294100  | 5.47212200  | C | 2.23734500  | 9.49302800  | 14.48415700 |
| H            | 0.78395100  | 1.91092300  | 6.95415900  | C | 3.27556400  | 9.27513500  | 13.58449700 |
| H            | 0.40833800  | 3.54311500  | 8.88130000  | C | 3.44077400  | 8.03320400  | 12.92777600 |
| C            | 1.02196500  | 7.08009600  | 9.16908600  | C | 2.52045000  | 7.01881100  | 13.24420800 |
| C            | 0.55594300  | 7.91797400  | 10.36347800 | C | 1.47634600  | 7.22166500  | 14.15298700 |
| H            | -0.14406300 | 7.34467800  | 10.98671200 | C | 1.32258100  | 8.46712600  | 14.77263500 |
| H            | 0.05087400  | 8.82830400  | 10.00027700 | C | 4.49753800  | 7.80792700  | 11.91255400 |
| H            | 1.40196100  | 8.21720300  | 10.99692100 | C | 5.58166200  | 8.54273400  | 11.88733600 |
| C            | -0.16097900 | 6.59459200  | 8.34486100  | C | 6.71782100  | 9.22846900  | 11.87842600 |
| H            | 0.16222500  | 6.05603800  | 7.44188100  | C | 6.94811000  | 10.56995500 | 11.19682700 |
| H            | -0.77293700 | 7.45756500  | 8.03015800  | H | 7.68090700  | 10.47876500 | 10.37104400 |
| H            | -0.79026800 | 5.92555400  | 8.95118400  | H | 7.40749700  | 11.27364700 | 11.92100800 |
| C            | 2.06881500  | 7.81155500  | 8.34481100  | H | 7.58216100  | 8.81180600  | 12.41739900 |
| H            | 2.95920500  | 8.03497500  | 8.94990200  | C | 4.56940800  | 2.39601700  | 5.31321300  |
| H            | 1.65507900  | 8.76710000  | 7.98081400  |   |             |             |             |

|             |            |             |             |   |             |             |             |
|-------------|------------|-------------|-------------|---|-------------|-------------|-------------|
| C           | 4.87505200 | 2.59249700  | 3.83921300  | C | 2.72015200  | 2.52735600  | 7.29951000  |
| C           | 5.44271700 | 1.32508400  | 5.96046900  | C | 3.07942200  | 3.55281500  | 8.16403300  |
| C           | 4.79512700 | 1.26670100  | 3.07516400  | C | 1.98963700  | 4.24671800  | 8.75655200  |
| H           | 5.88950800 | 3.01849900  | 3.77289100  | O | 1.04133500  | 5.59177300  | 10.87043200 |
| H           | 4.17204800 | 3.33762600  | 3.43693600  | P | 4.80650100  | 3.82334600  | 8.75048400  |
| C           | 5.35824600 | 0.00308800  | 5.19360100  | B | 9.26202500  | 8.83772100  | 11.51582600 |
| H           | 6.47485300 | 1.70952500  | 5.97718700  | S | 2.28960900  | 5.52632200  | 10.01454200 |
| H           | 5.13474400 | 1.21028400  | 7.01039400  | O | 3.53975600  | 1.70943500  | 6.58668600  |
| C           | 5.69331500 | 0.19859900  | 3.71039000  | O | 1.35544200  | 1.09378000  | 6.22319800  |
| H           | 5.06838800 | 1.42750800  | 2.01948600  | H | -0.69703100 | 2.51984000  | 7.49975200  |
| H           | 3.74886300 | 0.91680900  | 3.08450100  | H | -0.11427500 | 4.42041400  | 9.08303100  |
| H           | 6.03447900 | -0.73768300 | 5.64984000  | C | 2.29143500  | 7.12771500  | 8.98212200  |
| H           | 4.33496400 | -0.39869600 | 5.28626000  | C | 2.48465400  | 8.21457600  | 10.04391300 |
| H           | 5.59367300 | -0.75460200 | 3.16488100  | H | 1.68551700  | 8.17217400  | 10.79699700 |
| H           | 6.75043400 | 0.50802000  | 3.61384900  | H | 2.45354800  | 9.20115600  | 9.55419300  |
| C           | 6.34013400 | 4.54815500  | 8.29355500  | H | 3.45416000  | 8.11053100  | 10.55225500 |
| C           | 7.39449900 | 4.89650000  | 7.43727200  | C | 0.93771800  | 7.24826100  | 8.29695300  |
| C           | 6.38984300 | 3.32502500  | 8.98456200  | H | 0.81908800  | 6.51298500  | 7.48777000  |
| C           | 8.47098300 | 4.02481200  | 7.25198800  | H | 0.84324600  | 8.25543000  | 7.85964700  |
| H           | 7.37142400 | 5.84602800  | 6.90113600  | H | 0.12617300  | 7.11321000  | 9.02730700  |
| C           | 7.46573100 | 2.45710200  | 8.79095300  | C | 3.45835200  | 7.08664400  | 8.00486300  |
| H           | 5.59514700 | 3.07564000  | 9.69563600  | H | 4.41925200  | 6.98497600  | 8.53030100  |
| C           | 8.50729400 | 2.79834100  | 7.92181800  | H | 3.48885400  | 8.03641900  | 7.44618700  |
| H           | 9.28503000 | 4.30773600  | 6.57868700  | H | 3.36396300  | 6.27300900  | 7.27115800  |
| H           | 7.49233800 | 1.50921200  | 9.33519800  | C | 9.31861200  | 10.96041800 | 12.33084400 |
| H           | 9.34992700 | 2.11664900  | 7.77577100  | C | 9.61869000  | 9.93243300  | 13.48750700 |
| C           | 5.16767500 | 7.00633500  | 7.39133800  | O | 9.24082300  | 8.67543700  | 12.87975400 |
| C           | 4.96080800 | 6.87524100  | 6.00817600  | O | 9.48315900  | 10.14229700 | 11.14807100 |
| C           | 5.60799200 | 8.23464000  | 7.90826200  | C | 11.10693800 | 9.83115900  | 13.83113900 |
| C           | 5.19554300 | 7.95709800  | 5.15728400  | H | 11.46367800 | 10.72366600 | 14.36610100 |
| H           | 4.63493500 | 5.92104800  | 5.59448700  | H | 11.26147800 | 8.95345100  | 14.47556200 |
| C           | 5.85747300 | 9.31180100  | 7.05186200  | H | 11.71592900 | 9.69902400  | 12.92490400 |
| H           | 5.73486500 | 8.34918300  | 8.98925200  | C | 8.80005100  | 10.14010600 | 14.75520900 |
| C           | 5.64864200 | 9.17450000  | 5.67741900  | H | 9.04167600  | 9.35231500  | 15.48403400 |
| H           | 5.02753400 | 7.84752500  | 4.08214100  | H | 9.03378100  | 11.11452900 | 15.21187600 |
| H           | 6.17909000 | 10.26120500 | 7.47992300  | H | 7.72297500  | 10.09644600 | 14.55602000 |
| H           | 5.83171800 | 10.02080100 | 5.00926500  | C | 7.86717400  | 11.44865400 | 12.33078000 |
| Br          | 4.21792900 | 3.86177900  | 11.71756100 | H | 7.66832000  | 12.13762900 | 13.16481300 |
|             |            |             |             | H | 7.67451100  | 11.97907400 | 11.38672100 |
| <b>I-4b</b> |            |             |             | H | 7.16372500  | 10.60565300 | 12.39399600 |
| Cu          | 4.78540200 | 5.24561500  | 10.48139500 | C | 10.27752400 | 12.14053900 | 12.25495100 |
| C           | 0.66263800 | 3.88604900  | 8.53316400  | H | 9.99273500  | 12.79493300 | 11.41759600 |
| C           | 0.33629800 | 2.82430600  | 7.67025500  | H | 10.23903400 | 12.73411900 | 13.18162000 |
| C           | 1.38912800 | 2.15886400  | 7.06543500  | H | 11.31140000 | 11.81134400 | 12.08960900 |

|   |            |             |             |              |             |             |             |
|---|------------|-------------|-------------|--------------|-------------|-------------|-------------|
| H | 5.93360100 | 8.90198600  | 15.69743800 | C            | 2.72509000  | 0.62449500  | 6.09091800  |
| H | 6.82977700 | 8.10587700  | 13.50191700 | C            | 3.03402400  | 0.37118600  | 4.62842500  |
| H | 3.05065800 | 6.20634000  | 12.68600800 | C            | 2.93134700  | -0.60399500 | 6.96887800  |
| H | 2.16595900 | 6.99459500  | 14.82560400 | C            | 2.24802700  | -0.83414700 | 4.09959700  |
| O | 3.60325300 | 8.49850200  | 16.61852300 | H            | 4.11848200  | 0.18844900  | 4.55283300  |
| C | 2.30074200 | 8.21628700  | 17.06348900 | H            | 2.80801800  | 1.28671100  | 4.06099800  |
| H | 1.53237900 | 8.62842100  | 16.38332100 | C            | 2.14626000  | -1.80525400 | 6.43395900  |
| H | 2.19277200 | 8.68934500  | 18.04932000 | H            | 4.01299200  | -0.81410400 | 6.98522000  |
| H | 2.12539400 | 7.12943000  | 17.16754400 | H            | 2.64243400  | -0.35166100 | 8.00078000  |
| C | 5.31201700 | 8.32086700  | 15.01268800 | C            | 2.48277900  | -2.07846400 | 4.96364600  |
| C | 5.80091100 | 7.87917200  | 13.79054900 | H            | 2.52943700  | -1.02767100 | 3.05260500  |
| C | 5.00184900 | 7.11363700  | 12.91057600 | H            | 1.17375500  | -0.58421700 | 4.09948700  |
| C | 3.69991100 | 6.80233100  | 13.33093700 | H            | 2.35640100  | -2.69167700 | 7.05287500  |
| C | 3.18911800 | 7.25354400  | 14.55353100 | H            | 1.06721900  | -1.59793800 | 6.53029400  |
| C | 3.99624500 | 8.01863600  | 15.40468600 | H            | 1.88234800  | -2.92111900 | 4.58521500  |
| C | 5.51722200 | 6.66015200  | 11.60079800 | H            | 3.54159600  | -2.38538900 | 4.88212600  |
| C | 6.46220100 | 7.29681100  | 10.95419400 |              |             |             |             |
| C | 7.41671500 | 7.89149500  | 10.25443700 |              |             |             |             |
| C | 8.91193800 | 7.69734400  | 10.50022900 | <b>I-4b'</b> |             |             |             |
| H | 9.47782100 | 7.79503000  | 9.55882800  | Cu           | 4.86907600  | 4.56764400  | 10.75813700 |
| H | 9.10525600 | 6.70319700  | 10.93027700 | C            | 0.92506200  | 4.29783300  | 8.10113600  |
| H | 7.14256900 | 8.67433300  | 9.53332600  | C            | 0.57343500  | 3.40121000  | 7.07612300  |
| C | 5.36991500 | 2.09214000  | 8.96014800  | C            | 1.60910600  | 2.71785100  | 6.46519900  |
| C | 6.42190400 | 1.53401400  | 8.22480500  | C            | 2.93900800  | 2.90134900  | 6.85965000  |
| C | 4.70586900 | 1.31293000  | 9.92144000  | C            | 3.32032200  | 3.74503000  | 7.89507100  |
| C | 6.79344300 | 0.20311400  | 8.43674500  | C            | 2.25275600  | 4.47721000  | 8.47980400  |
| H | 6.94383600 | 2.13415200  | 7.47789900  | O            | 1.16814800  | 5.80656900  | 10.52808100 |
| C | 5.07254500 | -0.01742200 | 10.12332100 | P            | 5.01013500  | 3.72046100  | 8.65559200  |
| H | 3.89375300 | 1.74952200  | 10.50956300 | B            | 8.96872800  | 8.96319600  | 11.28823800 |
| C | 6.11747600 | -0.57626700 | 9.37890400  | S            | 2.52915700  | 5.61364700  | 9.88486700  |
| H | 7.61527000 | -0.22655400 | 7.85882900  | O            | 3.74062900  | 2.12124600  | 6.07206000  |
| H | 4.54747300 | -0.61815000 | 10.86970600 | O            | 1.55443300  | 1.79709100  | 5.45652900  |
| H | 6.40925100 | -1.61661800 | 9.54080100  | H            | -0.46485600 | 3.23668600  | 6.78395900  |
| C | 5.77644300 | 4.51026700  | 7.36180000  | H            | 0.16608500  | 4.84769300  | 8.66169400  |
| C | 6.73778200 | 5.48224500  | 7.68429500  | C            | 2.82939700  | 7.26132800  | 8.96000600  |
| C | 5.59627600 | 4.12802100  | 6.02174400  | C            | 3.01744300  | 8.24831900  | 10.11716700 |
| C | 7.51371100 | 6.06191000  | 6.67786500  | H            | 2.14009300  | 8.24037300  | 10.77952900 |
| H | 6.86779000 | 5.81247100  | 8.71867400  | H            | 3.14581500  | 9.26535400  | 9.71003700  |
| C | 6.37231800 | 4.71580600  | 5.02089600  | H            | 3.90867400  | 7.99598400  | 10.70912000 |
| H | 4.86119200 | 3.36605000  | 5.76317800  | C            | 1.59025000  | 7.59724500  | 8.14292300  |
| C | 7.33134900 | 5.68161800  | 5.34623500  | H            | 1.48691300  | 6.93894000  | 7.26745500  |
| H | 8.25217500 | 6.82160400  | 6.94369700  | H            | 1.65783300  | 8.63814500  | 7.78313900  |
| H | 6.22691200 | 4.41837700  | 3.97948400  | H            | 0.68953700  | 7.50133900  | 8.76784700  |
| H | 7.93330400 | 6.14034800  | 4.55799100  | C            | 4.09037100  | 7.14719700  | 8.11825200  |
|   |            |             |             | H            | 4.94582300  | 6.81946100  | 8.72408100  |

|   |             |             |             |             |            |             |             |
|---|-------------|-------------|-------------|-------------|------------|-------------|-------------|
| H | 4.33946600  | 8.13737300  | 7.70005100  | C           | 2.87932400 | 1.20810300  | 5.38092900  |
| H | 3.96323700  | 6.45347400  | 7.27557300  | C           | 3.30152600 | 1.10359700  | 3.92653800  |
| C | 8.56958600  | 11.04925900 | 12.09690200 | C           | 2.88059000 | -0.13994700 | 6.09592500  |
| C | 9.22694200  | 10.16050500 | 13.21866100 | C           | 2.45487600 | 0.06987600  | 3.17662500  |
| O | 9.12707900  | 8.83850600  | 12.65194900 | H           | 4.36515300 | 0.81445600  | 3.91823500  |
| O | 8.85033700  | 10.28427200 | 10.90614700 | H           | 3.22286400 | 2.10252900  | 3.47138400  |
| C | 10.71835000 | 10.45056600 | 13.41612900 | C           | 2.03374000 | -1.16850300 | 5.34244900  |
| H | 10.88542300 | 11.41498600 | 13.91947000 | H           | 3.92915900 | -0.46842300 | 6.17338600  |
| H | 11.15200600 | 9.65272000  | 14.03698600 | H           | 2.52321400 | 0.00981200  | 7.12568600  |
| H | 11.25024400 | 10.45937000 | 12.45335500 | C           | 2.47964700 | -1.29194400 | 3.88078100  |
| C | 8.50473700  | 10.18972400 | 14.55963500 | H           | 2.81233100 | -0.02234000 | 2.13803300  |
| H | 9.00585700  | 9.50932500  | 15.26448900 | H           | 1.41529100 | 0.43566400  | 3.12526300  |
| H | 8.52298800  | 11.20467000 | 14.98798500 | H           | 2.09240000 | -2.14487500 | 5.84985200  |
| H | 7.46224800  | 9.86630400  | 14.46443000 | H           | 0.97673900 | -0.85416400 | 5.37574600  |
| C | 7.04528600  | 11.13263200 | 12.22642400 | H           | 1.83810400 | -2.00942800 | 3.34252500  |
| H | 6.74008200  | 11.75997700 | 13.07722600 | H           | 3.50662200 | -1.70028500 | 3.84689000  |
| H | 6.63867100  | 11.57129900 | 11.30320600 | C           | 6.10708600 | 4.54635000  | 7.43061400  |
| H | 6.60150900  | 10.13356100 | 12.34561800 | C           | 5.87810200 | 4.58691400  | 6.04574500  |
| C | 9.16933600  | 12.44123400 | 11.94508700 | C           | 7.23814100 | 5.18633900  | 7.95835600  |
| H | 8.65133800  | 12.97911700 | 11.13667800 | C           | 6.76953600 | 5.25805600  | 5.20620200  |
| H | 9.05062100  | 13.02152800 | 12.87382900 | H           | 5.01060500 | 4.08180000  | 5.62109300  |
| H | 10.23641900 | 12.39567600 | 11.69054000 | C           | 8.13570900 | 5.84609300  | 7.11462700  |
| H | 6.08098500  | 8.45797100  | 15.73298400 | H           | 7.38901900 | 5.19785500  | 9.03925200  |
| H | 6.96275300  | 7.68729600  | 13.51837200 | C           | 7.90117100 | 5.88689600  | 5.73836400  |
| H | 3.24540300  | 5.64715900  | 12.77818400 | H           | 6.58067900 | 5.28980500  | 4.12953800  |
| H | 2.35784700  | 6.44291400  | 14.91514800 | H           | 9.00504800 | 6.34834400  | 7.54415100  |
| O | 3.77028700  | 7.99948100  | 16.69114100 | H           | 8.59487700 | 6.41558000  | 5.07897400  |
| C | 2.48848500  | 7.66491100  | 17.14743500 | C           | 5.45719900 | 1.94329000  | 8.44435100  |
| H | 1.69341300  | 8.04527600  | 16.47793800 | C           | 4.73243100 | 0.99680700  | 9.18907300  |
| H | 2.36944700  | 8.13019600  | 18.13720800 | C           | 6.50094000 | 1.51102200  | 7.61379100  |
| H | 2.35330500  | 6.57138600  | 17.24918900 | C           | 5.03496800 | -0.36134300 | 9.07485200  |
| C | 5.46499600  | 7.85949500  | 15.05728400 | H           | 3.95407100 | 1.33658500  | 9.88038400  |
| C | 5.94776400  | 7.42586100  | 13.82649500 | C           | 6.80255400 | 0.15059500  | 7.50883800  |
| C | 5.15917500  | 6.63420800  | 12.95969300 | H           | 7.07158100 | 2.23710400  | 7.03317100  |
| C | 3.87080800  | 6.28832600  | 13.40102500 | C           | 6.06607000 | -0.79157100 | 8.23325700  |
| C | 3.36793300  | 6.73565900  | 14.62762900 | H           | 4.46449200 | -1.08720500 | 9.66055400  |
| C | 4.16472500  | 7.52425000  | 15.46547200 | H           | 7.61689500 | -0.17348000 | 6.85464200  |
| C | 5.65685400  | 6.19175800  | 11.63637300 | H           | 6.30220200 | -1.85617400 | 8.14990100  |
| C | 6.46846900  | 6.94600700  | 10.94693900 | Br          | 3.41483200 | 2.88193600  | 11.87183100 |
| C | 7.25920400  | 7.69798800  | 10.18920500 |             |            |             |             |
| C | 8.78361900  | 7.76220000  | 10.31019900 | <b>I-5a</b> |            |             |             |
| H | 9.24876400  | 7.94321800  | 9.32599200  | Cu          | 4.32103000 | 6.46608800  | 10.69424700 |
| H | 9.18213200  | 6.82510700  | 10.72786000 | C           | 1.27180600 | 3.61570200  | 8.59850400  |
| H | 6.80897700  | 8.41041300  | 9.48401400  | C           | 1.42074800 | 2.63955200  | 7.59680300  |

|   |             |             |             |   |             |             |             |
|---|-------------|-------------|-------------|---|-------------|-------------|-------------|
| C | 2.58700500  | 2.67706700  | 6.85178000  | H | 5.31308900  | 14.18796100 | 9.23872800  |
| C | 3.58158000  | 3.63425000  | 7.09225900  | H | 3.08070900  | 11.10600700 | 15.03719900 |
| C | 3.48000100  | 4.59723400  | 8.08750300  | H | 4.57998400  | 10.49122100 | 13.13732900 |
| C | 2.26109600  | 4.57103100  | 8.81742700  | H | 2.64938700  | 6.65855100  | 12.88507500 |
| O | 0.95924600  | 5.07457800  | 11.09771200 | H | 1.17824800  | 7.24464900  | 14.75413600 |
| P | 4.87259000  | 5.67402100  | 8.64369000  | O | 1.26514600  | 9.65691900  | 16.06593900 |
| B | 5.77738200  | 11.35039200 | 10.07993100 | C | 0.28518300  | 8.79062600  | 16.58087000 |
| S | 1.99343400  | 5.72649000  | 10.19451200 | H | -0.46933800 | 8.52034400  | 15.81914800 |
| O | 4.61076100  | 3.43208500  | 6.23030400  | H | -0.21295100 | 9.32680300  | 17.40020000 |
| O | 2.97898900  | 1.85304700  | 5.84598700  | H | 0.72652600  | 7.85847800  | 16.97938100 |
| H | 0.66178600  | 1.87662500  | 7.41974700  | C | 3.00678900  | 10.12782100 | 14.55706300 |
| H | 0.39556600  | 3.62421700  | 9.24891800  | C | 3.84446500  | 9.77483300  | 13.50770500 |
| C | 1.07349300  | 7.15809300  | 9.34643100  | C | 3.75378900  | 8.51086400  | 12.87965500 |
| C | 0.74370000  | 8.08325800  | 10.52014900 | C | 2.76834200  | 7.63387900  | 13.35978000 |
| H | 0.11177900  | 7.56967600  | 11.25739900 | C | 1.92304300  | 7.96838000  | 14.42375600 |
| H | 0.20289200  | 8.96540900  | 10.14289900 | C | 2.03913000  | 9.22442900  | 15.03254600 |
| H | 1.65429800  | 8.42627600  | 11.02771800 | C | 4.64306900  | 8.11489000  | 11.76120400 |
| C | -0.19044100 | 6.61084700  | 8.69877800  | C | 5.75710200  | 8.76977400  | 11.53586200 |
| H | 0.03199800  | 5.99850100  | 7.81326600  | C | 6.90962300  | 9.38807300  | 11.32663500 |
| H | -0.82467600 | 7.45417700  | 8.38033800  | C | 7.11296600  | 10.62805900 | 10.47154600 |
| H | -0.75994700 | 6.00667900  | 9.42036700  | H | 7.69025200  | 10.39015500 | 9.55829900  |
| C | 2.01935200  | 7.81850000  | 8.35439500  | H | 7.73619300  | 11.35107900 | 11.03314500 |
| H | 2.95064400  | 8.13299700  | 8.84517300  | H | 7.80664800  | 8.99608000  | 11.82565800 |
| H | 1.53665800  | 8.71731200  | 7.93790200  | C | 4.33972500  | 2.20294700  | 5.50711100  |
| H | 2.27196100  | 7.15639100  | 7.51423300  | C | 4.45747100  | 2.47419900  | 4.01765800  |
| C | 4.19044800  | 12.37308700 | 8.78097900  | C | 5.90349000  | 2.80944100  | 3.63328500  |
| C | 3.66368300  | 12.19355400 | 10.25912200 | C | 6.87221200  | 1.71745400  | 4.10148700  |
| O | 4.87413500  | 11.85413800 | 10.97672100 | C | 6.74184400  | 1.47028000  | 5.60803500  |
| O | 5.38287300  | 11.55314000 | 8.77977900  | C | 5.29999100  | 1.12698000  | 5.99590000  |
| C | 3.05946800  | 13.44396700 | 10.88390600 | H | 5.97231600  | 2.95178900  | 2.54326900  |
| H | 2.17689600  | 13.77680200 | 10.31571300 | H | 4.11686000  | 1.56797100  | 3.49064000  |
| H | 2.73926400  | 13.21774400 | 11.91151200 | H | 3.76447600  | 3.28883600  | 3.75682400  |
| H | 3.78294900  | 14.26807800 | 10.92774400 | H | 6.66022400  | 0.78137200  | 3.55272300  |
| C | 2.70625000  | 11.01233300 | 10.40929700 | H | 7.90777800  | 1.99921700  | 3.85211200  |
| H | 2.50231200  | 10.84407300 | 11.47448300 | H | 7.41553100  | 0.66170100  | 5.93195600  |
| H | 1.75221000  | 11.19640900 | 9.89489600  | H | 7.04904300  | 2.37261900  | 6.15808000  |
| H | 3.15451300  | 10.09084600 | 10.01652800 | H | 4.98539300  | 0.17204100  | 5.54343400  |
| C | 3.24864400  | 11.85845900 | 7.69910200  | H | 5.19190900  | 1.03231100  | 7.08739600  |
| H | 2.28731500  | 12.39399500 | 7.73120000  | H | 6.18369000  | 3.76967500  | 4.09827800  |
| H | 3.69735300  | 12.01978100 | 6.70757000  | C | 5.16852800  | 6.89742900  | 7.31447900  |
| H | 3.06040700  | 10.78374000 | 7.81090900  | C | 5.07833300  | 6.58827200  | 5.94646600  |
| C | 4.63361100  | 13.80262100 | 8.46487400  | C | 5.51294200  | 8.19945300  | 7.70985200  |
| H | 5.17341700  | 13.80526600 | 7.50646200  | C | 5.32760200  | 7.57363000  | 4.99028300  |
| H | 3.77483200  | 14.48485600 | 8.38228000  | H | 4.82735700  | 5.57621200  | 5.63137500  |

|   |             |             |             |              |             |             |             |
|---|-------------|-------------|-------------|--------------|-------------|-------------|-------------|
| C | 5.76910000  | 9.18194200  | 6.74755800  | H            | 4.80108400  | 6.48662600  | 14.55535200 |
| H | 5.57077200  | 8.44598500  | 8.77352600  | H            | 6.01845200  | 5.69112800  | 15.57371700 |
| C | 5.67420800  | 8.86919000  | 5.38968200  | C            | 6.60816700  | 7.65744000  | 14.81897000 |
| H | 5.25222400  | 7.32805200  | 3.92784600  | H            | 7.69501500  | 7.49561400  | 14.94605400 |
| H | 6.01247700  | 10.19181100 | 7.07798100  | H            | 6.49087600  | 8.23747200  | 13.89127300 |
| H | 5.86701600  | 9.63893600  | 4.63798300  | C            | 6.08431100  | 8.49430300  | 15.98978400 |
| C | 6.29688800  | 4.52862700  | 8.51345900  | H            | 6.26654100  | 7.95667400  | 16.93864600 |
| C | 6.21950600  | 3.27935900  | 9.14956700  | H            | 4.99014900  | 8.58830000  | 15.89202900 |
| C | 7.49663600  | 4.91517000  | 7.90052700  | C            | 6.70710200  | 9.88742300  | 16.04705400 |
| C | 7.31813400  | 2.42008500  | 9.14448500  | H            | 6.31399800  | 10.47445900 | 16.89253300 |
| H | 5.29929100  | 2.98827700  | 9.65967300  | H            | 7.80392500  | 9.83523500  | 16.15590900 |
| C | 8.60354700  | 4.06205200  | 7.92117600  | H            | 6.49239500  | 10.44577100 | 15.12148700 |
| H | 7.57022900  | 5.88845700  | 7.41299500  | Sn           | 6.47626200  | 5.09646800  | 12.98827100 |
| C | 8.51667300  | 2.81132500  | 8.53790500  | O            | 4.75941600  | 4.66009300  | 11.91341800 |
| H | 7.24557100  | 1.44564900  | 9.62941800  | C            | 3.76546900  | 3.91328100  | 12.58405400 |
| H | 9.53651700  | 4.37708100  | 7.44776900  | H            | 3.44314200  | 4.39305800  | 13.52930300 |
| H | 9.37897700  | 2.14068000  | 8.54597400  | H            | 2.86668000  | 3.82673100  | 11.95527300 |
| C | 7.77299000  | 5.81041600  | 11.41711200 | H            | 4.11724700  | 2.89179700  | 12.82759300 |
| H | 7.93392000  | 4.95153900  | 10.75013100 |              |             |             |             |
| H | 7.18507900  | 6.55575600  | 10.86314000 | <b>I-5a'</b> |             |             |             |
| C | 9.10413400  | 6.40287600  | 11.87593200 | Cu           | 4.31583100  | 7.13367500  | 11.31249800 |
| H | 8.93173100  | 7.22378100  | 12.59392900 | C            | 1.53436700  | 3.56909600  | 9.23355900  |
| H | 9.69786500  | 5.64595800  | 12.42203800 | C            | 1.95151400  | 2.52366800  | 8.39254000  |
| C | 9.93123100  | 6.93763300  | 10.70226500 | C            | 3.16986700  | 2.68516700  | 7.75968700  |
| H | 9.32207300  | 7.68034100  | 10.15764800 | C            | 3.96072600  | 3.81915600  | 7.97234900  |
| H | 10.11282500 | 6.11357500  | 9.98911000  | C            | 3.59295700  | 4.86320100  | 8.81454500  |
| C | 11.25644600 | 7.56551800  | 11.12861700 | C            | 2.31101100  | 4.71056200  | 9.41365700  |
| H | 11.89347300 | 6.83743900  | 11.65878400 | O            | 0.46953300  | 5.21560700  | 11.28147700 |
| H | 11.82688700 | 7.94009400  | 10.26366700 | P            | 4.74881800  | 6.22177500  | 9.30638900  |
| H | 11.09076400 | 8.41567100  | 11.81132400 | B            | 4.43442700  | 12.17795300 | 10.13083000 |
| C | 7.05371300  | 3.11990100  | 13.71675800 | S            | 1.59525700  | 5.94477700  | 10.56510800 |
| H | 6.27444600  | 2.79218100  | 14.42580800 | O            | 5.09369700  | 3.71198400  | 7.21656500  |
| H | 7.97623000  | 3.24988800  | 14.30943300 | O            | 3.79261400  | 1.84350000  | 6.88326800  |
| C | 7.25724800  | 2.09054800  | 12.60776200 | H            | 1.35160600  | 1.62414500  | 8.24655100  |
| H | 8.03669600  | 2.44432300  | 11.91061600 | H            | 0.59990700  | 3.51027000  | 9.79567300  |
| H | 6.33810500  | 2.01597400  | 12.00016300 | C            | 0.65754000  | 7.05699600  | 9.31454300  |
| C | 7.63541700  | 0.69413800  | 13.11060200 | C            | -0.07310500 | 8.03802000  | 10.23532900 |
| H | 8.55740900  | 0.76550300  | 13.71540400 | H            | -0.72717800 | 7.49797700  | 10.93364900 |
| H | 6.85082800  | 0.33457200  | 13.80056400 | H            | -0.68658600 | 8.72330700  | 9.62689600  |
| C | 7.83513800  | -0.31962900 | 11.98442000 | H            | 0.63304500  | 8.63456800  | 10.82716600 |
| H | 8.63924200  | -0.00135200 | 11.29968300 | C            | -0.33237200 | 6.20940600  | 8.52961100  |
| H | 8.10376900  | -1.31525700 | 12.37164900 | H            | 0.17164900  | 5.55792500  | 7.80104400  |
| H | 6.91618100  | -0.43443200 | 11.38467300 | H            | -1.02748400 | 6.86720400  | 7.97990000  |
| C | 5.88175900  | 6.32051700  | 14.67816100 | H            | -0.91863900 | 5.58384500  | 9.21968600  |



|   |             |             |             |   |            |             |             |
|---|-------------|-------------|-------------|---|------------|-------------|-------------|
| C | 1.67032400  | 7.76692800  | 8.43255500  | H | 6.00485900 | 12.82556400 | 11.48563900 |
| H | 2.44742000  | 8.25302100  | 9.03884300  | H | 6.39662800 | 10.68132300 | 12.70748400 |
| H | 1.16514700  | 8.54606300  | 7.83687100  | C | 5.10357700 | 2.38955300  | 6.63738000  |
| H | 2.15816500  | 7.07851300  | 7.72996600  | C | 5.34558200 | 2.51613500  | 5.14134900  |
| C | 3.08103200  | 12.59672500 | 8.32787300  | C | 6.75201500 | 3.05519500  | 4.85870400  |
| C | 2.22853800  | 12.53503800 | 9.65415700  | C | 7.82232000 | 2.18998500  | 5.53408600  |
| O | 3.24827200  | 12.60191000 | 10.67544500 | C | 7.56761900 | 2.07444100  | 7.04033700  |
| O | 4.35586700  | 12.07316600 | 8.75897700  | C | 6.16257500 | 1.54474000  | 7.33726300  |
| C | 1.26394000  | 13.69807200 | 9.85174500  | H | 6.91973800 | 3.10767500  | 3.77048700  |
| H | 0.51588800  | 13.72632200 | 9.04365900  | H | 5.21762600 | 1.51428600  | 4.69858800  |
| H | 0.73172900  | 13.56880300 | 10.80563200 | H | 4.56476800 | 3.16795900  | 4.72000900  |
| H | 1.78798900  | 14.66232700 | 9.88363900  | H | 7.82012500 | 1.18290000  | 5.07557600  |
| C | 1.49433900  | 11.20632600 | 9.82375100  | H | 8.82256200 | 2.61643700  | 5.35248700  |
| H | 1.03352800  | 11.16732500 | 10.81827800 | H | 8.32015000 | 1.42568800  | 7.51603300  |
| H | 0.70468500  | 11.07925100 | 9.06949900  | H | 7.67322300 | 3.06479800  | 7.50444000  |
| H | 2.19119000  | 10.36099100 | 9.75952700  | H | 6.04420700 | 0.50708900  | 6.98170500  |
| C | 2.54545500  | 11.73635300 | 7.18960600  | H | 5.95519100 | 1.55536100  | 8.41834800  |
| H | 1.52760700  | 12.05284300 | 6.91244300  | H | 6.82041600 | 4.08591500  | 5.24486100  |
| H | 3.18988500  | 11.84048700 | 6.30411000  | C | 4.87014200 | 7.32100700  | 7.83384900  |
| H | 2.52552100  | 10.67515900 | 7.46322600  | C | 5.09021800 | 8.68341600  | 8.08595900  |
| C | 3.33405800  | 14.02476300 | 7.83627200  | C | 4.80521700 | 6.86914700  | 6.50583300  |
| H | 4.09862300  | 13.99752300 | 7.04553400  | C | 5.27159500 | 9.57825300  | 7.02657600  |
| H | 2.42191600  | 14.48163600 | 7.42389000  | H | 5.10124500 | 9.04380000  | 9.11901700  |
| H | 3.70888600  | 14.66307900 | 8.64962800  | C | 4.96780700 | 7.76706100  | 5.44904300  |
| H | 0.39900600  | 11.56614100 | 14.04509500 | H | 4.64917000 | 5.81045700  | 6.29968200  |
| H | 2.53608000  | 11.27613100 | 12.77607800 | C | 5.20904700 | 9.12105400  | 5.70811100  |
| H | 2.07906200  | 7.00893400  | 13.02513400 | H | 5.42766900 | 10.63357800 | 7.25033800  |
| H | -0.01874000 | 7.27364600  | 14.24597500 | H | 4.91316800 | 7.40641300  | 4.41801100  |
| O | -1.12140400 | 9.71236200  | 14.90255700 | H | 5.34044800 | 9.82201200  | 4.87903900  |
| C | -1.88683200 | 8.62174800  | 15.34090500 | C | 6.39512100 | 5.39725300  | 9.26871700  |
| H | -2.22401600 | 7.98505500  | 14.50142500 | C | 6.63651200 | 4.37210600  | 10.19679500 |
| H | -2.76943900 | 9.03542000  | 15.85033100 | C | 7.45162900 | 5.86071600  | 8.47122200  |
| H | -1.33110600 | 7.98236300  | 16.05239600 | C | 7.90874100 | 3.80902700  | 10.30220600 |
| C | 0.78207700  | 10.57079700 | 13.80699000 | H | 5.83092200 | 4.05244200  | 10.86359900 |
| C | 1.97159200  | 10.40199400 | 13.10705900 | C | 8.72977400 | 5.30944600  | 8.59711400  |
| C | 2.47019300  | 9.11692200  | 12.79005600 | H | 7.28310100 | 6.66545200  | 7.75530300  |
| C | 1.71643700  | 8.01651000  | 13.23147600 | C | 8.96269500 | 4.28059100  | 9.51242200  |
| C | 0.52307200  | 8.16961300  | 13.94395800 | H | 8.08516300 | 3.01279800  | 11.02518500 |
| C | 0.04318700  | 9.45296200  | 14.23003200 | H | 9.54523700 | 5.68911000  | 7.97547800  |
| C | 3.72055600  | 8.91637900  | 12.02448300 | H | 9.96066700 | 3.84561900  | 9.61185400  |
| C | 4.62876800  | 9.85657100  | 11.96396500 | C | 8.17477800 | 8.15959800  | 14.63949900 |
| C | 5.60457500  | 10.75578400 | 11.94691100 | H | 8.04726700 | 9.13765300  | 14.14586000 |
| C | 5.74169500  | 11.89293500 | 10.94662100 | H | 8.09895000 | 8.35132200  | 15.72534100 |
| H | 6.57979800  | 11.71267800 | 10.24492800 | C | 9.53389400 | 7.54767300  | 14.30100800 |

|    |             |             |             |    |             |             |             |
|----|-------------|-------------|-------------|----|-------------|-------------|-------------|
| H  | 9.63898000  | 6.56603600  | 14.79979300 | Cu | 4.43360300  | 7.07757400  | 11.13919100 |
| H  | 9.59139900  | 7.33248500  | 13.21949300 | C  | 1.27307500  | 4.94469500  | 8.46986100  |
| C  | 10.73162400 | 8.42329000  | 14.68674300 | C  | 1.38124700  | 3.95798400  | 7.47303800  |
| H  | 10.68726200 | 8.63899600  | 15.77023700 | C  | 2.63450200  | 3.75961000  | 6.91980100  |
| H  | 10.63568900 | 9.40216300  | 14.18267900 | C  | 3.74836200  | 4.50042000  | 7.33801700  |
| C  | 12.08121000 | 7.79502100  | 14.33974400 | C  | 3.68649700  | 5.45663300  | 8.34289400  |
| H  | 12.16015400 | 7.59882200  | 13.25699100 | C  | 2.38695500  | 5.67666900  | 8.87269800  |
| H  | 12.92544900 | 8.44490100  | 14.62420300 | O  | 0.87773200  | 6.43123800  | 10.94870800 |
| H  | 12.21444000 | 6.82876300  | 14.85571900 | P  | 5.16906900  | 6.18045100  | 9.17759700  |
| C  | 4.72491900  | 7.67156200  | 15.17526400 | B  | 8.01425500  | 11.75909300 | 12.90445800 |
| H  | 4.66751700  | 7.07877800  | 16.10615300 | S  | 2.15291000  | 6.85183400  | 10.23637400 |
| H  | 3.85228200  | 7.40124300  | 14.57100000 | O  | 4.83749900  | 4.10136700  | 6.62729400  |
| C  | 4.76356800  | 9.16765800  | 15.46957900 | O  | 3.01280400  | 2.87149400  | 5.96384400  |
| H  | 4.81967300  | 9.72403000  | 14.52080300 | H  | 0.52365300  | 3.36234800  | 7.15797500  |
| H  | 5.67590000  | 9.43309600  | 16.03697100 | H  | 0.32455600  | 5.13047400  | 8.97668900  |
| C  | 3.53395700  | 9.65109800  | 16.24658700 | C  | 1.71558000  | 8.45288100  | 9.30044300  |
| H  | 2.62730700  | 9.33081100  | 15.70960500 | C  | 1.44468300  | 9.45648500  | 10.42323600 |
| H  | 3.50247800  | 9.14912400  | 17.23233400 | H  | 0.65589100  | 9.09381500  | 11.09665000 |
| C  | 3.50178700  | 11.16681700 | 16.43082100 | H  | 1.11387200  | 10.40781400 | 9.97642400  |
| H  | 3.49078500  | 11.67257100 | 15.45197500 | H  | 2.34949200  | 9.64748000  | 11.01490400 |
| H  | 2.60494900  | 11.49220600 | 16.98364800 | C  | 0.46409900  | 8.19154400  | 8.47371400  |
| H  | 4.38844600  | 11.52643800 | 16.98233900 | H  | 0.66441200  | 7.52764000  | 7.62058700  |
| C  | 7.03368800  | 4.89946200  | 14.86604200 | H  | 0.08810300  | 9.14944200  | 8.07935300  |
| H  | 7.77012800  | 5.07643900  | 15.67149900 | H  | -0.32255600 | 7.74485700  | 9.09966400  |
| H  | 6.12301400  | 4.48716500  | 15.32809100 | C  | 2.91580800  | 8.87196500  | 8.46294000  |
| C  | 7.57968000  | 3.92576000  | 13.82886300 | H  | 3.81081600  | 9.00189800  | 9.08793200  |
| H  | 6.81067400  | 3.78314800  | 13.05405700 | H  | 2.69571700  | 9.84165400  | 7.98727000  |
| H  | 8.45801900  | 4.35768000  | 13.31562600 | H  | 3.14015500  | 8.15337300  | 7.66209300  |
| C  | 7.96198200  | 2.56677700  | 14.42582800 | C  | 8.30131200  | 13.99129900 | 13.29673300 |
| H  | 7.08067600  | 2.14820400  | 14.94454200 | C  | 7.30151200  | 13.37624200 | 14.35246100 |
| H  | 8.72970100  | 2.71459600  | 15.20847100 | O  | 7.50135700  | 11.95463500 | 14.16559600 |
| C  | 8.47098500  | 1.55844200  | 13.39576300 | O  | 8.40217500  | 12.93538000 | 12.31486700 |
| H  | 8.74905200  | 0.59853500  | 13.86215000 | C  | 7.60231800  | 13.73536300 | 15.80215500 |
| H  | 7.70103600  | 1.34668600  | 12.63530800 | H  | 7.55905600  | 14.82583100 | 15.94868700 |
| H  | 9.36068800  | 1.94115400  | 12.86709200 | H  | 6.85529200  | 13.27138800 | 16.46214800 |
| Sn | 6.45358300  | 6.87339100  | 14.13756900 | H  | 8.59209800  | 13.37653200 | 16.11131800 |
| O  | 6.49338700  | 7.02560900  | 12.08869900 | C  | 5.83426600  | 13.67055600 | 14.03199500 |
| C  | 7.47801500  | 7.74415800  | 11.39986400 | H  | 5.19537200  | 13.07870400 | 14.70215300 |
| H  | 8.35929400  | 7.11348000  | 11.16568000 | H  | 5.59302800  | 14.73358600 | 14.17743400 |
| H  | 7.06338700  | 8.09857400  | 10.43997900 | H  | 5.58677100  | 13.38793300 | 12.99878200 |
| H  | 7.82674400  | 8.64506800  | 11.93613200 | C  | 7.80646700  | 15.25642900 | 12.60736500 |
| Br | 4.07459000  | 4.97513500  | 12.77755200 | H  | 7.63452200  | 16.06012800 | 13.34008300 |
|    |             |             |             | H  | 8.56287700  | 15.60461100 | 11.88829700 |
|    |             |             |             | H  | 6.87479700  | 15.07569600 | 12.05656700 |

**I-5b**

|   |             |             |             |   |             |             |             |
|---|-------------|-------------|-------------|---|-------------|-------------|-------------|
| C | 9.70769500  | 14.21217500 | 13.85946900 | C | 5.90569700  | 7.16635100  | 6.58885300  |
| H | 10.39160300 | 14.43091800 | 13.02637200 | C | 7.29369800  | 9.32803100  | 7.70267100  |
| H | 9.73711400  | 15.05522100 | 14.56526900 | H | 6.66230700  | 8.56366200  | 9.61715400  |
| H | 10.07587100 | 13.31250600 | 14.37354500 | C | 6.54238500  | 8.09377000  | 5.76123800  |
| H | 3.38857100  | 11.52808600 | 15.75694600 | H | 5.38353900  | 6.31668300  | 6.14948300  |
| H | 4.94694500  | 10.85785400 | 13.92484400 | C | 7.23899600  | 9.17356600  | 6.31529700  |
| H | 2.33152700  | 7.59270600  | 12.92960200 | H | 7.82453000  | 10.17307200 | 8.14728800  |
| H | 0.80466500  | 8.23203100  | 14.72652700 | H | 6.49564600  | 7.97198700  | 4.67616300  |
| O | 1.22085600  | 10.37315700 | 16.39912600 | H | 7.73431700  | 9.89677300  | 5.66269600  |
| C | 0.04450000  | 9.66579800  | 16.70161700 | C | 6.26892500  | 4.70885900  | 9.18659800  |
| H | -0.66631800 | 9.66409600  | 15.85476700 | C | 5.87754700  | 3.62219300  | 9.98546500  |
| H | -0.42141700 | 10.17581100 | 17.55590200 | C | 7.44588200  | 4.62343300  | 8.43238900  |
| H | 0.25426300  | 8.61693500  | 16.98184100 | C | 6.63297000  | 2.44894700  | 9.98900300  |
| C | 3.17062600  | 10.66902400 | 15.11817900 | H | 4.98916900  | 3.71137000  | 10.61415500 |
| C | 4.02824200  | 10.29345000 | 14.09471100 | C | 8.21088800  | 3.45450500  | 8.45677700  |
| C | 3.75987500  | 9.17613200  | 13.27118900 | H | 7.75700700  | 5.46378600  | 7.81075100  |
| C | 2.58435600  | 8.45885900  | 13.54146200 | C | 7.80150300  | 2.36141000  | 9.22542700  |
| C | 1.70591600  | 8.82409800  | 14.56855000 | H | 6.31824600  | 1.60348900  | 10.60181500 |
| C | 1.99678000  | 9.93582500  | 15.36875000 | H | 9.12667800  | 3.39619300  | 7.86388000  |
| C | 4.69016500  | 8.75785600  | 12.19303200 | H | 8.39583800  | 1.44462500  | 9.23739100  |
| C | 5.66971800  | 9.54509700  | 11.82599600 | C | 7.56628400  | 6.45043300  | 12.37878000 |
| C | 6.68811900  | 10.30240500 | 11.44858400 | H | 7.00487600  | 6.87163600  | 11.53267400 |
| C | 8.03011000  | 10.37524900 | 12.17125600 | H | 8.01226600  | 7.31153100  | 12.90050000 |
| H | 8.87088800  | 10.30022700 | 11.45989000 | C | 8.63568900  | 5.46609800  | 11.91329700 |
| H | 8.11034200  | 9.54998700  | 12.89388800 | H | 9.18043600  | 5.05026800  | 12.78108600 |
| H | 6.54907400  | 11.01327300 | 10.62124100 | H | 8.16826700  | 4.60485800  | 11.40819000 |
| C | 4.46600700  | 2.89838800  | 5.92328200  | C | 9.64016400  | 6.11392600  | 10.95470200 |
| C | 5.01833500  | 1.68592500  | 6.66273500  | H | 10.06593400 | 7.01464200  | 11.43229300 |
| C | 4.71361100  | 0.38938300  | 5.90709100  | H | 9.09390700  | 6.47608700  | 10.06598800 |
| C | 5.21110900  | 0.46133600  | 4.45896000  | C | 10.76406800 | 5.17255200  | 10.52805500 |
| C | 4.62683800  | 1.67731200  | 3.73083500  | H | 10.35904300 | 4.27206600  | 10.03982200 |
| C | 4.92993600  | 2.97888100  | 4.48175900  | H | 11.45562100 | 5.65780300  | 9.82066200  |
| H | 5.17001300  | -0.46363900 | 6.43361000  | H | 11.35581600 | 4.83895200  | 11.39709400 |
| H | 6.10459600  | 1.83608800  | 6.76790000  | C | 6.46043000  | 3.68092700  | 14.51065300 |
| H | 4.60136300  | 1.67562300  | 7.68140900  | H | 5.67568300  | 3.47750400  | 15.25939000 |
| H | 6.31448000  | 0.52892300  | 4.45506200  | H | 7.40846500  | 3.75943500  | 15.07147500 |
| H | 4.95185800  | -0.46383100 | 3.91964000  | C | 6.53272500  | 2.55854900  | 13.47806400 |
| H | 5.02003700  | 1.74282100  | 2.70412000  | H | 7.32201200  | 2.77966700  | 12.74046000 |
| H | 3.53297300  | 1.56374400  | 3.64615000  | H | 5.59262800  | 2.52609000  | 12.89964600 |
| H | 6.01519300  | 3.17100500  | 4.50086100  | C | 6.79222200  | 1.17749500  | 14.08830400 |
| H | 4.44497500  | 3.84579200  | 4.00789600  | H | 7.73374300  | 1.21121400  | 14.66565500 |
| H | 3.62357700  | 0.22063300  | 5.91179600  | H | 5.99795600  | 0.95223700  | 14.82279900 |
| C | 5.95695600  | 7.32058700  | 7.98376900  | C | 6.86648900  | 0.05792800  | 13.05064100 |
| C | 6.64955800  | 8.40959800  | 8.53540500  | H | 7.67467600  | 0.24211300  | 12.32322400 |

|              |             |             |             |   |             |             |             |
|--------------|-------------|-------------|-------------|---|-------------|-------------|-------------|
| H            | 7.05653800  | -0.92106000 | 13.51846900 | H | 0.52134900  | 6.18252800  | 7.90959100  |
| H            | 5.92319900  | -0.02386800 | 12.48420400 | H | -0.64357100 | 7.41591200  | 8.47790400  |
| C            | 5.39327600  | 6.94194200  | 15.34103100 | H | -0.52197000 | 5.84229200  | 9.32863000  |
| H            | 4.38794300  | 7.31444200  | 15.09944000 | C | 2.07691700  | 8.14586500  | 9.04580500  |
| H            | 5.30459000  | 6.28673600  | 16.22395800 | H | 2.86557700  | 8.47947800  | 9.73853800  |
| C            | 6.35199800  | 8.10284200  | 15.61073000 | H | 1.54476100  | 9.04585000  | 8.68239600  |
| H            | 7.38582500  | 7.73057400  | 15.74627500 | H | 2.54863500  | 7.66447400  | 8.17406400  |
| H            | 6.38177600  | 8.76449100  | 14.72911800 | C | 8.63542800  | 10.84912100 | 12.43614700 |
| C            | 5.96221800  | 8.92556900  | 16.84188800 | C | 8.38521900  | 10.63715900 | 10.89245000 |
| H            | 5.92993000  | 8.26257100  | 17.72613900 | O | 7.09947100  | 11.27151000 | 10.69622400 |
| H            | 4.93504200  | 9.29983800  | 16.69994600 | O | 7.29546400  | 11.00288700 | 12.94878400 |
| C            | 6.90912400  | 10.09678900 | 17.09582700 | C | 9.40013500  | 11.31479700 | 9.97689100  |
| H            | 6.58215400  | 10.70385600 | 17.95598700 | H | 10.41305400 | 10.90890000 | 10.14742800 |
| H            | 7.93271700  | 9.74362300  | 17.30997700 | H | 9.12514700  | 11.12253000 | 8.92563500  |
| H            | 6.96944900  | 10.75006600 | 16.21262700 | H | 9.42481500  | 12.40521900 | 10.12757300 |
| Sn           | 6.04673100  | 5.67122800  | 13.71035900 | C | 8.23903600  | 9.16334700  | 10.51178900 |
| O            | 4.44175800  | 5.31227500  | 12.44728000 | H | 7.90647000  | 9.10271500  | 9.46559800  |
| C            | 3.24853800  | 4.80666500  | 13.01116700 | H | 9.19884500  | 8.62771900  | 10.59879700 |
| H            | 2.91098800  | 5.39718100  | 13.88406500 | H | 7.49815000  | 8.64638600  | 11.14371100 |
| H            | 2.43721400  | 4.84894800  | 12.26668400 | C | 9.29944500  | 9.66472000  | 13.12906700 |
| H            | 3.36791900  | 3.75490200  | 13.33778300 | H | 10.28318300 | 9.44765500  | 12.67657100 |
|              |             |             |             | H | 9.45801800  | 9.89671200  | 14.19572900 |
|              |             |             |             | H | 8.66533400  | 8.76953900  | 13.05910900 |
| <b>I-5b'</b> |             |             |             | C | 9.38071500  | 12.14668100 | 12.76653200 |
| Cu           | 4.85896000  | 6.75207200  | 11.61092800 | H | 9.33538500  | 12.31182600 | 13.85682500 |
| C            | 1.94052500  | 3.90606300  | 8.66111600  | H | 10.44054500 | 12.09792600 | 12.46282000 |
| C            | 2.32757200  | 3.12283100  | 7.56055400  | H | 8.91184700  | 13.01438900 | 12.27265200 |
| C            | 3.54227100  | 3.43227300  | 6.97814800  | H | 0.85607800  | 9.41280800  | 16.04027100 |
| C            | 4.35371900  | 4.45400700  | 7.48009600  | H | 2.55688200  | 9.93815100  | 14.28147100 |
| C            | 4.01859000  | 5.23177000  | 8.58460200  | H | 2.74195100  | 5.76624500  | 13.24520900 |
| C            | 2.74010000  | 4.94293000  | 9.13627100  | H | 1.04015200  | 5.24733600  | 14.91436700 |
| O            | 0.96358400  | 4.89815000  | 11.12709300 | O | -0.10821300 | 7.11859000  | 16.58116800 |
| P            | 5.22040800  | 6.40971300  | 9.36630200  | C | -0.58141500 | 5.81809200  | 16.80367300 |
| B            | 6.45726300  | 11.33083700 | 11.91046300 | H | -1.07325000 | 5.39540900  | 15.90428200 |
| S            | 2.06465400  | 5.80773000  | 10.60481400 | H | -1.32139000 | 5.88618500  | 17.61849400 |
| O            | 5.47923000  | 4.53684100  | 6.70820900  | H | 0.23026700  | 5.12774300  | 17.11129400 |
| O            | 4.14351100  | 2.84587300  | 5.90034100  | C | 1.27737200  | 8.62434700  | 15.40946500 |
| H            | 1.70810800  | 2.30599400  | 7.18364400  | C | 2.22650400  | 8.90612500  | 14.43357500 |
| H            | 1.01045600  | 3.70720300  | 9.19945600  | C | 2.78406200  | 7.89208500  | 13.61921500 |
| C            | 1.09430000  | 7.22146700  | 9.74766500  | C | 2.33140300  | 6.58200700  | 13.84272900 |
| C            | 0.42211200  | 7.92667000  | 10.93132200 | C | 1.36245900  | 6.28414500  | 14.80689700 |
| H            | -0.18827500 | 7.21764900  | 11.51401900 | C | 0.83208100  | 7.30530100  | 15.60274300 |
| H            | -0.23372500 | 8.73233400  | 10.55039500 | C | 3.78783900  | 8.18545300  | 12.56764400 |
| H            | 1.17014000  | 8.37608400  | 11.60324700 | C | 3.90656000  | 9.39514900  | 12.08581400 |
| C            | 0.05633000  | 6.62401900  | 8.80713400  |   |             |             |             |

|   |             |             |             |    |             |             |             |
|---|-------------|-------------|-------------|----|-------------|-------------|-------------|
| C | 4.03325300  | 10.60616800 | 11.55417200 | H  | 8.83465100  | 5.91728300  | 15.31419700 |
| C | 4.94616600  | 11.71562500 | 12.08711900 | H  | 9.10354600  | 7.67084400  | 15.37797100 |
| H | 4.73449900  | 11.93511800 | 13.15032700 | C  | 8.33901900  | 6.81033200  | 17.23134100 |
| H | 4.74400800  | 12.64453000 | 11.52191500 | H  | 7.93405300  | 7.76272300  | 17.62446700 |
| H | 3.46341800  | 10.84601500 | 10.64311400 | H  | 7.62003600  | 6.02703400  | 17.54284400 |
| C | 5.43225100  | 3.46811500  | 5.74198800  | C  | 9.68500000  | 6.53410700  | 17.91502900 |
| C | 5.55477000  | 4.06746800  | 4.34604900  | H  | 10.40976600 | 7.31431200  | 17.61049400 |
| C | 6.93572700  | 4.70253600  | 4.13942900  | H  | 10.09081600 | 5.57666700  | 17.53436600 |
| C | 8.05699600  | 3.69533300  | 4.42710600  | C  | 9.59273300  | 6.48400000  | 19.44162600 |
| C | 7.92158100  | 3.10574600  | 5.83632700  | H  | 8.89592000  | 5.69094900  | 19.77183400 |
| C | 6.54338800  | 2.47051400  | 6.05270200  | H  | 10.57557000 | 6.28254200  | 19.90640100 |
| H | 7.01614600  | 5.09249900  | 3.10889300  | H  | 9.21797300  | 7.44166000  | 19.84930800 |
| H | 5.38953300  | 3.25378700  | 3.61671900  | C  | 5.73073000  | 9.16535700  | 15.15069700 |
| H | 4.74430500  | 4.80418900  | 4.21320400  | H  | 4.72677300  | 9.06425700  | 15.59467000 |
| H | 8.01812500  | 2.88078900  | 3.67600300  | H  | 5.60364400  | 9.61538300  | 14.15813900 |
| H | 9.04152800  | 4.18404600  | 4.31539000  | C  | 6.65378800  | 10.01461300 | 16.02324700 |
| H | 8.71091100  | 2.35643400  | 6.02269200  | H  | 7.67410000  | 10.01750700 | 15.59971300 |
| H | 8.06279200  | 3.90335300  | 6.58306300  | H  | 6.74381100  | 9.57928200  | 17.03833400 |
| H | 6.40184800  | 1.59528400  | 5.39228500  | C  | 6.18199000  | 11.46830000 | 16.14832000 |
| H | 6.42272200  | 2.13226500  | 7.09535700  | H  | 6.06672100  | 11.88340300 | 15.13217700 |
| H | 7.03731700  | 5.56647500  | 4.82063500  | H  | 5.17725100  | 11.48696700 | 16.61350900 |
| C | 5.27506200  | 7.83534300  | 8.19375000  | C  | 7.14454300  | 12.34454900 | 16.95179400 |
| C | 5.37713500  | 9.11001000  | 8.76417000  | H  | 8.14018200  | 12.37790700 | 16.46951800 |
| C | 5.23452100  | 7.71560200  | 6.79327100  | H  | 6.77922700  | 13.38482900 | 17.03616100 |
| C | 5.45620600  | 10.25012100 | 7.95774900  | H  | 7.28701600  | 11.95412500 | 17.97764200 |
| H | 5.37858400  | 9.22231600  | 9.84978300  | C  | 5.24325600  | 5.48428300  | 15.42584600 |
| C | 5.29735500  | 8.85418400  | 5.98735700  | H  | 4.83776800  | 5.75514100  | 16.41928500 |
| H | 5.16920600  | 6.72906600  | 6.33292400  | H  | 4.40028100  | 5.41313400  | 14.72682700 |
| C | 5.41252900  | 10.12461700 | 6.56771300  | C  | 6.01119700  | 4.16313900  | 15.46612100 |
| H | 5.55775600  | 11.22748200 | 8.43597600  | H  | 6.46934700  | 3.98167100  | 14.47811700 |
| H | 5.26222700  | 8.74925600  | 4.89773300  | H  | 6.83700300  | 4.20917300  | 16.20509700 |
| H | 5.46717800  | 11.01458300 | 5.93183900  | C  | 5.10601600  | 2.96831000  | 15.78652400 |
| C | 6.83876300  | 5.58864400  | 9.03179700  | H  | 4.29023100  | 2.95264900  | 15.04171400 |
| C | 7.06179800  | 4.29049700  | 9.52437100  | H  | 4.63442000  | 3.11636800  | 16.77891600 |
| C | 7.90992200  | 6.28661900  | 8.45366000  | C  | 5.84882600  | 1.63178200  | 15.75371500 |
| C | 8.33230600  | 3.71799100  | 9.45193100  | H  | 5.17876500  | 0.78473000  | 15.99187300 |
| H | 6.24510200  | 3.75234500  | 10.01328200 | H  | 6.27287100  | 1.45160900  | 14.74876200 |
| C | 9.18433900  | 5.71360700  | 8.39258500  | H  | 6.68513100  | 1.61426000  | 16.47950800 |
| H | 7.75317200  | 7.28936600  | 8.05275300  | Sn | 6.45162300  | 7.15693600  | 14.76160000 |
| C | 9.40336300  | 4.42910800  | 8.89806900  | O  | 6.94904800  | 7.04165600  | 12.76132800 |
| H | 8.48937500  | 2.71098600  | 9.85166300  | C  | 7.91194500  | 6.09331800  | 12.36041100 |
| H | 10.00954400 | 6.27897700  | 7.94711300  | H  | 8.84307600  | 6.15440600  | 12.96369500 |
| H | 10.40113900 | 3.98079700  | 8.85377800  | H  | 7.51605500  | 5.06131300  | 12.40992800 |
| C | 8.42162300  | 6.86526000  | 15.70323500 | H  | 8.18611300  | 6.29104300  | 11.30905800 |

|             |             |             |             |   |             |             |             |
|-------------|-------------|-------------|-------------|---|-------------|-------------|-------------|
| Br          | 4.71383000  | 4.20393600  | 12.11096600 | H | 2.28346000  | 12.69514800 | 10.30656300 |
|             |             |             |             | H | 1.97270800  | 11.08465800 | 9.61657600  |
| <b>I-6a</b> |             |             |             | H | 2.85116400  | 11.22505700 | 11.15138700 |
| Cu          | 4.71279400  | 6.61754300  | 10.41729700 | C | 3.73117700  | 12.13670700 | 7.92677100  |
| C           | 1.35890000  | 3.96072100  | 8.82941300  | H | 3.10263900  | 11.35846500 | 7.47045200  |
| C           | 1.46330100  | 2.84442100  | 7.98283700  | H | 3.20234800  | 13.09786800 | 7.85162700  |
| C           | 2.60624800  | 2.75289200  | 7.20872900  | H | 4.66403500  | 12.20667800 | 7.34828500  |
| C           | 3.60269000  | 3.73798100  | 7.25176900  | H | 2.66668000  | 10.63873000 | 14.34543400 |
| C           | 3.52055800  | 4.86494600  | 8.05718100  | H | 4.70003000  | 9.86745900  | 13.10549200 |
| C           | 2.34517400  | 4.94465300  | 8.85782700  | H | 3.15729900  | 5.85800600  | 13.10044700 |
| O           | 1.32093500  | 5.47324700  | 11.25665900 | H | 1.15814100  | 6.59431100  | 14.29994000 |
| P           | 4.84988600  | 6.13519900  | 8.18726700  | O | 0.70638800  | 9.19275000  | 15.06604600 |
| B           | 5.98352600  | 10.60173600 | 9.50846800  | C | -0.33254300 | 8.32167700  | 15.44497800 |
| S           | 2.20743600  | 6.14619600  | 10.22311200 | H | -0.79921600 | 7.83285400  | 14.57040100 |
| O           | 4.59308700  | 3.39914100  | 6.38331000  | H | -1.08697500 | 8.93436500  | 15.95664800 |
| O           | 2.96394800  | 1.78180100  | 6.33047600  | H | 0.02158600  | 7.53602800  | 16.13666200 |
| H           | 0.69807900  | 2.06795000  | 7.95775200  | C | 2.79180100  | 9.59193500  | 14.06113400 |
| H           | 0.53178200  | 4.04246400  | 9.53585100  | C | 3.91602200  | 9.15620300  | 13.37293000 |
| C           | 1.13701400  | 7.54760300  | 9.53362200  | C | 4.08100100  | 7.80236400  | 13.01248300 |
| C           | 0.96714900  | 8.45809900  | 10.75347700 | C | 3.07243500  | 6.90562300  | 13.38708000 |
| H           | 0.46462400  | 7.92768800  | 11.57257700 | C | 1.92893500  | 7.32790400  | 14.06905100 |
| H           | 0.35860200  | 9.33154800  | 10.47070100 | C | 1.78069800  | 8.67809900  | 14.41145000 |
| H           | 1.93643500  | 8.81948900  | 11.12681300 | C | 5.28405000  | 7.33349100  | 12.28166300 |
| C           | -0.19520600 | 6.96831800  | 9.07981000  | C | 6.00411500  | 8.14069800  | 11.51491200 |
| H           | -0.08589300 | 6.35178500  | 8.17578600  | C | 6.90764500  | 8.95708000  | 10.99232700 |
| H           | -0.88817000 | 7.79387900  | 8.84884600  | C | 6.98647800  | 9.39924800  | 9.54305800  |
| H           | -0.64046400 | 6.35853100  | 9.87935900  | H | 6.69525500  | 8.57505700  | 8.87719800  |
| C           | 1.90233300  | 8.23594800  | 8.41574600  | H | 8.01067100  | 9.71023900  | 9.28936700  |
| H           | 2.86801100  | 8.62501800  | 8.76664100  | H | 7.60989600  | 9.43275000  | 11.68888000 |
| H           | 1.31380200  | 9.09362900  | 8.04994600  | C | 4.34786000  | 2.02334500  | 5.98960600  |
| H           | 2.07093700  | 7.56744200  | 7.56035500  | C | 4.56229500  | 1.89724900  | 4.49479500  |
| C           | 4.00971800  | 11.75815200 | 9.38270500  | C | 6.03786100  | 2.11800700  | 4.13883600  |
| C           | 5.13167800  | 12.64313800 | 10.05324200 | C | 6.95025400  | 1.17221600  | 4.92845200  |
| O           | 6.33637200  | 11.90312800 | 9.74306700  | C | 6.72146900  | 1.31269900  | 6.43676100  |
| O           | 4.62213200  | 10.44563200 | 9.36879600  | C | 5.25020900  | 1.10295500  | 6.80374500  |
| C           | 5.25923500  | 14.05173400 | 9.48938600  | H | 6.17982300  | 1.98361400  | 3.05485200  |
| H           | 4.32465400  | 14.61554500 | 9.63354200  | H | 4.23950100  | 0.88572700  | 4.19909700  |
| H           | 6.06512400  | 14.58620600 | 10.01344600 | H | 3.90415500  | 2.61789900  | 3.98572300  |
| H           | 5.50307400  | 14.03978100 | 8.41944600  | H | 6.75334700  | 0.12972300  | 4.61723500  |
| C           | 5.02278500  | 12.68837700 | 11.57880100 | H | 8.00530000  | 1.37831700  | 4.68687800  |
| H           | 5.94043800  | 13.13617400 | 11.98642700 | H | 7.34833000  | 0.60099600  | 6.99667000  |
| H           | 4.16351500  | 13.28886900 | 11.91017500 | H | 7.02517900  | 2.31840800  | 6.75927500  |
| H           | 4.92494100  | 11.67675700 | 11.99516000 | H | 4.93310400  | 0.06748000  | 6.59686700  |
| C           | 2.70652100  | 11.68842500 | 10.16760900 | H | 5.07416100  | 1.29458500  | 7.87438800  |

|   |             |             |             |              |             |             |             |
|---|-------------|-------------|-------------|--------------|-------------|-------------|-------------|
| H | 6.30803600  | 3.16182500  | 4.37126200  | H            | 6.36942000  | 0.36062700  | 12.44288900 |
| C | 4.60050100  | 7.12827500  | 6.65845100  | C            | 7.93868700  | 0.11619700  | 10.96842200 |
| C | 4.28500800  | 6.51450400  | 5.43286400  | H            | 8.94641300  | 0.50214000  | 10.73783300 |
| C | 4.73520300  | 8.52187700  | 6.70850000  | H            | 8.02123700  | -0.97581100 | 11.09084400 |
| C | 4.11457500  | 7.28541400  | 4.28194100  | H            | 7.30721600  | 0.30732800  | 10.08342800 |
| H | 4.19091600  | 5.43093800  | 5.37044200  | C            | 5.90706900  | 5.81501100  | 15.03908700 |
| C | 4.56894600  | 9.28968500  | 5.55248200  | H            | 4.81873000  | 5.69013400  | 15.15890900 |
| H | 4.93324200  | 9.01911000  | 7.65523400  | H            | 6.38242100  | 5.05832800  | 15.68461500 |
| C | 4.25866500  | 8.67549900  | 4.33776000  | C            | 6.32529600  | 7.23613700  | 15.42231900 |
| H | 3.87015700  | 6.79653100  | 3.33574100  | H            | 7.39140500  | 7.24464300  | 15.71202200 |
| H | 4.67333000  | 10.37496700 | 5.60919000  | H            | 6.25746600  | 7.90899900  | 14.55196800 |
| H | 4.12502700  | 9.27745500  | 3.43567900  | C            | 5.48121400  | 7.84812200  | 16.54493600 |
| C | 6.43367500  | 5.25483600  | 7.87763600  | H            | 5.55503400  | 7.21726200  | 17.44958000 |
| C | 6.92326400  | 4.42372000  | 8.89948400  | H            | 4.42142000  | 7.82000400  | 16.23589600 |
| C | 7.21296300  | 5.47184400  | 6.73197000  | C            | 5.87353700  | 9.28673800  | 16.87529400 |
| C | 8.16880000  | 3.80912500  | 8.76535600  | H            | 5.24782500  | 9.70847800  | 17.67850400 |
| H | 6.33669100  | 4.29109200  | 9.81186300  | H            | 6.92589100  | 9.35313800  | 17.20009200 |
| C | 8.46335000  | 4.85963500  | 6.60837100  | H            | 5.75931400  | 9.93454400  | 15.98997700 |
| H | 6.85106300  | 6.12071400  | 5.93432500  | Sn           | 6.31597800  | 5.22658300  | 12.94721800 |
| C | 8.94453200  | 4.02853100  | 7.62318200  | O            | 4.89378600  | 4.73134200  | 11.33004100 |
| H | 8.53531400  | 3.16590000  | 9.56652600  | C            | 4.14873500  | 3.54994700  | 11.19390800 |
| H | 9.06488800  | 5.03895700  | 5.71389900  | H            | 3.06917200  | 3.73770500  | 11.32136300 |
| H | 9.92367000  | 3.55374500  | 7.52555800  | H            | 4.29651900  | 3.09222500  | 10.19394600 |
| C | 8.23228400  | 5.82723700  | 12.07212300 | H            | 4.43996600  | 2.79376700  | 11.94089600 |
| H | 8.85384400  | 4.92770400  | 11.93686700 |              |             |             |             |
| H | 8.00017300  | 6.20852600  | 11.06517400 | <b>I-6a'</b> |             |             |             |
| C | 8.97856400  | 6.88945400  | 12.87866400 | Cu           | 4.81130600  | 6.06170900  | 11.57752800 |
| H | 8.29366300  | 7.70928700  | 13.15016100 | C            | 1.36056400  | 3.49737400  | 8.79779500  |
| H | 9.31998000  | 6.46425400  | 13.84061400 | C            | 1.75609400  | 2.48494800  | 7.90746800  |
| C | 10.17949000 | 7.48537100  | 12.13744900 | C            | 3.01315300  | 2.60776700  | 7.34471000  |
| H | 9.82851000  | 7.89075500  | 11.17143400 | C            | 3.85797900  | 3.67358100  | 7.66908600  |
| H | 10.88935700 | 6.67669400  | 11.88519200 | C            | 3.51530900  | 4.67719700  | 8.56898100  |
| C | 10.89612100 | 8.58050800  | 12.92560700 | C            | 2.19926300  | 4.56734200  | 9.09630100  |
| H | 11.27476900 | 8.19807900  | 13.88852100 | O            | 0.31602900  | 5.07862900  | 10.90509500 |
| H | 11.75349700 | 8.99365500  | 12.36997000 | P            | 4.73944900  | 5.88753400  | 9.24780500  |
| H | 10.21234400 | 9.41593900  | 13.15323500 | B            | 4.47845000  | 12.22364100 | 10.42564700 |
| C | 6.62529200  | 3.04001800  | 13.25483600 | S            | 1.52435900  | 5.77510700  | 10.29003900 |
| H | 5.69305400  | 2.55800500  | 13.59458700 | O            | 5.02102900  | 3.54221200  | 6.96691200  |
| H | 7.32039800  | 2.99452300  | 14.11265600 | O            | 3.63078200  | 1.78175000  | 6.45048200  |
| C | 7.21468700  | 2.30959700  | 12.05133400 | H            | 1.11112500  | 1.63665700  | 7.67398800  |
| H | 8.20796500  | 2.73399200  | 11.81747600 | H            | 0.39774000  | 3.45973800  | 9.31051100  |
| H | 6.59969600  | 2.49607800  | 11.15460800 | C            | 0.70573600  | 7.01036800  | 9.07204800  |
| C | 7.36002800  | 0.79265200  | 12.21158400 | C            | 0.04630000  | 8.01989300  | 10.01373900 |
| H | 7.99524900  | 0.57456300  | 13.08893800 | H            | -0.70297300 | 7.54232000  | 10.65785500 |

|   |             |             |             |   |            |             |             |
|---|-------------|-------------|-------------|---|------------|-------------|-------------|
| H | -0.45418400 | 8.80219000  | 9.41918400  | C | 0.28282000 | 7.97773600  | 13.38329800 |
| H | 0.78514300  | 8.50612300  | 10.66542200 | C | 4.40058500 | 9.26175000  | 13.55862100 |
| C | -0.33506400 | 6.28391100  | 8.23330400  | C | 4.80970000 | 10.44373100 | 13.17508000 |
| H | 0.12806600  | 5.62542700  | 7.48425300  | C | 5.25645900 | 11.62565600 | 12.79737400 |
| H | -0.96188300 | 7.02136400  | 7.70314500  | C | 5.69556500 | 11.97079600 | 11.38390000 |
| H | -0.98397800 | 5.67971300  | 8.88463100  | H | 6.31288800 | 11.16401900 | 10.95492300 |
| C | 1.78508500  | 7.67264600  | 8.23193800  | H | 6.33633500 | 12.87211500 | 11.39188700 |
| H | 2.55873100  | 8.13232300  | 8.86260800  | H | 5.23853400 | 12.44672000 | 13.52760400 |
| H | 1.33661800  | 8.47369800  | 7.62051300  | C | 4.97073300 | 2.27994500  | 6.26631100  |
| H | 2.27414100  | 6.96716700  | 7.54662100  | C | 5.23340500 | 2.53150300  | 4.78855100  |
| C | 3.26760000  | 12.44741100 | 8.49764200  | C | 6.66706400 | 3.02227300  | 4.55900200  |
| C | 2.32927600  | 12.55840700 | 9.75592700  | C | 7.68866900 | 2.05352600  | 5.16553100  |
| O | 3.28059100  | 12.75786400 | 10.82315700 | C | 7.41240600 | 1.82299000  | 6.65473300  |
| O | 4.48279400  | 11.91689700 | 9.08028700  | C | 5.98265800 | 1.32794000  | 6.89220400  |
| C | 1.35722900  | 13.73038000 | 9.73286000  | H | 6.84661500 | 3.15610900  | 3.47976000  |
| H | 0.67332600  | 13.65314200 | 8.87298500  | H | 5.05907100 | 1.58187700  | 4.25584400  |
| H | 0.75325500  | 13.72246800 | 10.65221000 | H | 4.48925000 | 3.25698200  | 4.42490700  |
| H | 1.88343300  | 14.69258000 | 9.68210300  | H | 7.64361000 | 1.08973900  | 4.62408500  |
| C | 1.58817100  | 11.25488700 | 10.05400800 | H | 8.70959700 | 2.44516700  | 5.02631400  |
| H | 1.12806600  | 11.31535600 | 11.04897100 | H | 8.13113100 | 1.10492900  | 7.08005200  |
| H | 0.79950800  | 11.05397200 | 9.31532000  | H | 7.55320900 | 2.76515700  | 7.20426200  |
| H | 2.27807500  | 10.40004800 | 10.06942200 | H | 5.82649400 | 0.33373800  | 6.44049900  |
| C | 2.76285300  | 11.50317300 | 7.41466100  | H | 5.76400400 | 1.24833000  | 7.96773600  |
| H | 1.77003700  | 11.82333600 | 7.06112400  | H | 6.78392900 | 4.01354700  | 5.02814800  |
| H | 3.44863100  | 11.50629600 | 6.55535400  | C | 5.04977200 | 7.07871100  | 7.86771000  |
| H | 2.69282300  | 10.47236700 | 7.77878900  | C | 5.19977900 | 8.43297400  | 8.19888700  |
| C | 3.62217200  | 13.80776200 | 7.89120400  | C | 5.16519500 | 6.69233000  | 6.52106900  |
| H | 4.44421800  | 13.67265800 | 7.17273300  | C | 5.48300300 | 9.38396600  | 7.21386200  |
| H | 2.76622500  | 14.25163300 | 7.36113000  | H | 5.09730600 | 8.75330800  | 9.23625200  |
| H | 3.95827700  | 14.51260800 | 8.66574100  | C | 5.43212700 | 7.64385200  | 5.53473100  |
| H | -0.21979700 | 10.06892400 | 13.34293700 | H | 5.06532000 | 5.64253600  | 6.24839000  |
| H | 2.16484300  | 10.83180700 | 13.42779600 | C | 5.59829800 | 8.99019100  | 5.87928100  |
| H | 3.42324400  | 6.71677100  | 13.54346200 | H | 5.59162100 | 10.42835200 | 7.50893200  |
| H | 1.12713300  | 5.96640600  | 13.38447500 | H | 5.51917300 | 7.32977600  | 4.49082800  |
| O | -1.03902400 | 7.66191000  | 13.30221900 | H | 5.81450800 | 9.73150900  | 5.10505800  |
| C | -1.39662200 | 6.29141000  | 13.36956000 | C | 6.30186200 | 4.90146800  | 9.25209400  |
| H | -0.94042700 | 5.71541600  | 12.54818300 | C | 6.32549200 | 3.67244000  | 9.93540700  |
| H | -2.49281800 | 6.25613600  | 13.29180600 | C | 7.49998500 | 5.42028500  | 8.74026900  |
| H | -1.09159700 | 5.84944900  | 14.33604400 | C | 7.52604200 | 2.98054500  | 10.09440800 |
| C | 0.60077700  | 9.34869800  | 13.38684000 | H | 5.40657400 | 3.27654500  | 10.37384200 |
| C | 1.92608800  | 9.76528100  | 13.43580500 | C | 8.70275600 | 4.72856700  | 8.91545300  |
| C | 2.98590300  | 8.83402800  | 13.49947200 | H | 7.49938900 | 6.37225200  | 8.20800500  |
| C | 2.64155500  | 7.47544100  | 13.50900200 | C | 8.72131500 | 3.50822900  | 9.59411500  |
| C | 1.31733800  | 7.03715900  | 13.43951900 | H | 7.52769700 | 2.02919300  | 10.63121300 |



|    |             |             |             |             |            |             |             |
|----|-------------|-------------|-------------|-------------|------------|-------------|-------------|
| H  | 9.62996400  | 5.15197300  | 8.52049900  | H           | 7.66684200 | 8.62850100  | 11.67384900 |
| H  | 9.66218400  | 2.97050500  | 9.73553400  | H           | 6.97703200 | 7.67318800  | 10.35425600 |
| C  | 7.91237700  | 8.93625900  | 14.35038300 | H           | 6.03255400 | 8.99723000  | 11.09349800 |
| H  | 7.79339400  | 9.74726300  | 13.61287000 | Br          | 3.62156700 | 4.09077500  | 12.27527600 |
| H  | 8.14378500  | 9.42399800  | 15.31234300 |             |            |             |             |
| C  | 9.03434500  | 7.98462500  | 13.93606800 | <b>I-6b</b> |            |             |             |
| H  | 9.25128700  | 7.28208700  | 14.76131700 | Cu          | 5.04383500 | 6.65527400  | 11.52726900 |
| H  | 8.69748700  | 7.35150000  | 13.09878800 | C           | 1.58150200 | 5.83717700  | 8.58168000  |
| C  | 10.33440800 | 8.68879900  | 13.53428900 | C           | 1.52067000 | 5.01776500  | 7.43905300  |
| H  | 10.68791100 | 9.31705000  | 14.37315500 | C           | 2.72284200 | 4.68703400  | 6.84050800  |
| H  | 10.11739600 | 9.38889800  | 12.70655600 | C           | 3.94561100 | 5.14274800  | 7.35323000  |
| C  | 11.43825700 | 7.72042600  | 13.10909000 | C           | 4.04645900 | 5.91525900  | 8.50202300  |
| H  | 11.11103300 | 7.10296100  | 12.25561100 | C           | 2.79974700 | 6.28425200  | 9.08452000  |
| H  | 12.36067000 | 8.24652800  | 12.81036000 | O           | 1.36520400 | 6.95427900  | 11.24439200 |
| H  | 11.69798200 | 7.02853700  | 13.92855400 | P           | 5.64479600 | 6.20597600  | 9.36497300  |
| C  | 5.36673400  | 8.70477300  | 16.61252900 | B           | 7.03346900 | 11.63004400 | 12.48428700 |
| H  | 6.10959700  | 8.27866500  | 17.31377500 | S           | 2.71838500 | 7.24970600  | 10.62775100 |
| H  | 4.39614700  | 8.23982800  | 16.86456000 | O           | 4.95321900 | 4.69229600  | 6.56162100  |
| C  | 5.28540100  | 10.21979400 | 16.77162500 | O           | 2.95232200 | 3.91439800  | 5.74702400  |
| H  | 4.55633100  | 10.62777800 | 16.04852700 | H           | 0.57258200 | 4.64520800  | 7.04944300  |
| H  | 6.25346200  | 10.68137400 | 16.49590100 | H           | 0.67577700 | 6.10295200  | 9.12987000  |
| C  | 4.90171600  | 10.70166400 | 18.17659000 | C           | 2.57151000 | 9.03272300  | 9.97917000  |
| H  | 3.93167000  | 10.25122300 | 18.45634800 | C           | 2.61515800 | 9.85801500  | 11.26777800 |
| H  | 5.63419700  | 10.31110900 | 18.90749900 | H           | 1.85734000 | 9.51535900  | 11.98678100 |
| C  | 4.81538200  | 12.22356800 | 18.29746300 | H           | 2.41549900 | 10.91449200 | 11.02875400 |
| H  | 4.06698300  | 12.63369900 | 17.59811200 | H           | 3.59934600 | 9.79462300  | 11.75108300 |
| H  | 4.53475900  | 12.54582200 | 19.31465000 | C           | 1.23200500 | 9.16789000  | 9.26974400  |
| H  | 5.78170300  | 12.69690700 | 18.05178800 | H           | 1.21394100 | 8.60780700  | 8.32324000  |
| C  | 5.84655100  | 5.84729800  | 14.90677200 | H           | 1.04812400 | 10.23043200 | 9.04153500  |
| H  | 5.81630800  | 5.73992800  | 16.00531000 | H           | 0.42024200 | 8.80183700  | 9.91453600  |
| H  | 4.88453300  | 5.47469300  | 14.52494100 | C           | 3.75602800 | 9.34025000  | 9.07649600  |
| C  | 6.98888700  | 5.02980000  | 14.30585200 | H           | 4.70983500 | 9.11926600  | 9.57424900  |
| H  | 7.06681100  | 5.25914100  | 13.23143200 | H           | 3.75566800 | 10.41461800 | 8.82976800  |
| H  | 7.95262900  | 5.33864100  | 14.75122700 | H           | 3.71005000 | 8.77939800  | 8.13387900  |
| C  | 6.81970400  | 3.51817800  | 14.48538600 | C           | 6.58988900 | 13.86153300 | 12.62828800 |
| H  | 5.88352800  | 3.21299400  | 13.98844600 | C           | 5.55297600 | 13.04603400 | 13.49129800 |
| H  | 6.69578500  | 3.28283000  | 15.55958300 | O           | 6.18412000 | 11.74315000 | 13.55560000 |
| C  | 7.99369000  | 2.72312000  | 13.91454600 | O           | 7.20957600 | 12.81910900 | 11.83174600 |
| H  | 7.84277700  | 1.63400000  | 14.00870200 | C           | 5.34370700 | 13.55894400 | 14.90926500 |
| H  | 8.13169300  | 2.95299100  | 12.84573200 | H           | 4.94231200 | 14.58398900 | 14.89694700 |
| H  | 8.93931600  | 2.97543300  | 14.42632500 | H           | 4.61920000 | 12.91532600 | 15.42998100 |
| Sn | 5.93838600  | 8.00873900  | 14.55589200 | H           | 6.27680800 | 13.55216200 | 15.48643200 |
| O  | 6.20828700  | 7.26416500  | 12.24126700 | C           | 4.20652400 | 12.85881700 | 12.78947700 |
| C  | 6.72611700  | 8.15779500  | 11.32147900 | H           | 3.61358900 | 12.11314200 | 13.33631600 |

|   |             |             |             |   |             |            |             |
|---|-------------|-------------|-------------|---|-------------|------------|-------------|
| H | 3.63723000  | 13.79893000 | 12.75235500 | H | 3.27002500  | 2.85660700 | 3.27503100  |
| H | 4.34284900  | 12.49028600 | 11.76294200 | H | 5.98864400  | 3.84830500 | 4.32407400  |
| C | 5.97592800  | 14.89501300 | 11.69421400 | H | 4.58075500  | 4.86235500 | 3.93526800  |
| H | 5.41878100  | 15.65324500 | 12.26584100 | H | 3.06791600  | 1.23098500 | 5.34295900  |
| H | 6.77235600  | 15.40590900 | 11.13318900 | C | 6.61833600  | 7.31214800 | 8.28224100  |
| H | 5.29594000  | 14.43068200 | 10.96894700 | C | 7.89013300  | 7.69110500 | 8.74910300  |
| C | 7.70042800  | 14.49569600 | 13.46868800 | C | 6.16371800  | 7.80975000 | 7.05438900  |
| H | 8.49412700  | 14.85289100 | 12.79655200 | C | 8.68831700  | 8.55451700 | 7.99894500  |
| H | 7.32852600  | 15.34972000 | 14.05337400 | H | 8.25272500  | 7.30614700 | 9.70538800  |
| H | 8.14392300  | 13.76488400 | 14.16050600 | C | 6.96217400  | 8.68222100 | 6.30909200  |
| H | 2.78433700  | 10.81457900 | 15.50966100 | H | 5.18660900  | 7.50987300 | 6.67335600  |
| H | 4.91526000  | 10.11946000 | 14.39457200 | C | 8.22308000  | 9.05763900 | 6.77891900  |
| H | 3.27792700  | 6.20578800  | 13.71676600 | H | 9.67452800  | 8.84111900 | 8.37143800  |
| H | 1.14391800  | 6.89541500  | 14.76341700 | H | 6.59698200  | 9.06631100 | 5.35353100  |
| O | 0.70023500  | 9.39826200  | 15.79614700 | H | 8.84488500  | 9.74027100 | 6.19504100  |
| C | -0.42544200 | 8.55754700  | 15.89030000 | C | 6.55267500  | 4.61201300 | 9.22108100  |
| H | -0.77464700 | 8.22615800  | 14.89574000 | C | 6.37154900  | 3.67621900 | 10.25193300 |
| H | -1.21864600 | 9.14596100  | 16.37115300 | C | 7.42392200  | 4.32199600 | 8.15941400  |
| H | -0.22072600 | 7.66274300  | 16.50582600 | C | 7.03330300  | 2.44635900 | 10.19802900 |
| C | 2.90902500  | 9.80528600  | 15.11090700 | H | 5.74185900  | 3.95061700 | 11.10909900 |
| C | 4.09527900  | 9.40929400  | 14.50245100 | C | 8.09121600  | 3.09680000 | 8.12085700  |
| C | 4.23876300  | 8.10561500  | 13.99254300 | H | 7.57546700  | 5.04894800 | 7.36143600  |
| C | 3.16816200  | 7.21070000  | 14.12971300 | C | 7.88971800  | 2.15245200 | 9.13443800  |
| C | 1.96668400  | 7.60744400  | 14.71974600 | H | 6.88967800  | 1.72544200 | 11.00659300 |
| C | 1.82829700  | 8.91279200  | 15.21258000 | H | 8.77342400  | 2.87749600 | 7.29560700  |
| C | 5.48711400  | 7.68846000  | 13.29411600 | H | 8.41598800  | 1.19532500 | 9.10099300  |
| C | 6.03834600  | 8.39776200  | 12.29394600 | C | 8.23014300  | 5.80535000 | 12.65317500 |
| C | 6.76028700  | 9.23177300  | 11.56008100 | H | 7.64084700  | 5.89973100 | 11.72824400 |
| C | 7.72704600  | 10.27798500 | 12.08734300 | H | 8.91871000  | 6.66729800 | 12.67060900 |
| H | 8.49980200  | 10.46768500 | 11.32642100 | C | 8.99889300  | 4.48706500 | 12.64923900 |
| H | 8.23326800  | 9.89433700  | 12.98648500 | H | 9.59717500  | 4.38491700 | 13.57383000 |
| H | 6.68478100  | 9.17445200  | 10.47130600 | H | 8.29019200  | 3.64354800 | 12.65429300 |
| C | 4.38794900  | 3.68038800  | 5.70410100  | C | 9.91887400  | 4.34056700 | 11.43273100 |
| C | 4.69554500  | 2.29991900  | 6.27333000  | H | 10.63651900 | 5.18145200 | 11.41711800 |
| C | 4.17020800  | 1.19389500  | 5.35356500  | H | 9.31068100  | 4.44024400 | 10.51770200 |
| C | 4.69924000  | 1.36402100  | 3.92478400  | C | 10.67402800 | 3.01374300 | 11.40071500 |
| C | 4.36414700  | 2.75291000  | 3.36859400  | H | 9.97231300  | 2.16392300 | 11.39365100 |
| C | 4.88718000  | 3.86495700  | 4.28500100  | H | 11.30808400 | 2.92734800 | 10.50371700 |
| H | 4.45161000  | 0.20901300  | 5.75816200  | H | 11.32446000 | 2.89941900 | 12.28432600 |
| H | 5.78923100  | 2.23125600  | 6.38797900  | C | 5.73955100  | 4.43152000 | 15.08907300 |
| H | 4.26558500  | 2.23204200  | 7.28501200  | H | 4.67351500  | 4.69774700 | 15.04461900 |
| H | 5.79596300  | 1.22518100  | 3.92289100  | H | 6.02840700  | 4.36676600 | 16.15186300 |
| H | 4.28356400  | 0.58297200  | 3.26808800  | C | 5.99007900  | 3.12053600 | 14.34681700 |
| H | 4.78308200  | 2.87934800  | 2.35782500  | H | 7.04555500  | 2.81211600 | 14.45757700 |

|              |            |             |             |   |             |             |             |
|--------------|------------|-------------|-------------|---|-------------|-------------|-------------|
| H            | 5.81243200 | 3.29759700  | 13.27602200 | C | 1.36950100  | 7.73830400  | 9.93076100  |
| C            | 5.08663300 | 1.97251400  | 14.80473400 | C | 1.08912100  | 8.63138100  | 11.14240300 |
| H            | 5.26434800 | 1.75800200  | 15.87462500 | H | 0.44646000  | 8.11665300  | 11.87124700 |
| H            | 4.03475600 | 2.30036300  | 14.72944100 | H | 0.57799200  | 9.55215000  | 10.81396600 |
| C            | 5.28538200 | 0.70282100  | 13.97781300 | H | 2.02054600  | 8.91593500  | 11.65012900 |
| H            | 6.32790600 | 0.34596300  | 14.03667600 | C | 0.08552900  | 7.38431800  | 9.19604100  |
| H            | 4.63260800 | -0.11767900 | 14.31684200 | H | 0.28474400  | 6.80844400  | 8.28009900  |
| H            | 5.06006200 | 0.89101300  | 12.91432100 | H | -0.44313000 | 8.31000500  | 8.91113400  |
| C            | 7.60697700 | 7.34359700  | 15.88695200 | H | -0.56829600 | 6.78983300  | 9.85111800  |
| H            | 6.82000700 | 7.38749400  | 16.65919000 | C | 2.42101300  | 8.35094300  | 9.01925700  |
| H            | 8.45619800 | 6.79492900  | 16.32933800 | H | 3.38283700  | 8.46423300  | 9.53615200  |
| C            | 8.01504100 | 8.74915700  | 15.45424200 | H | 2.09899800  | 9.35942100  | 8.70800200  |
| H            | 8.82777200 | 8.68506100  | 14.70652000 | H | 2.58169300  | 7.75274400  | 8.11215000  |
| H            | 7.17240700 | 9.23372500  | 14.93466400 | C | 8.69153800  | 11.48453800 | 13.25557300 |
| C            | 8.46323300 | 9.67528000  | 16.58879600 | C | 8.87017500  | 10.82945500 | 11.83471100 |
| H            | 9.32659300 | 9.22912800  | 17.11486000 | O | 7.58074100  | 11.08964000 | 11.22551600 |
| H            | 7.65230000 | 9.73860200  | 17.33653100 | O | 7.26853300  | 11.35498900 | 13.46890600 |
| C            | 8.81604300 | 11.07888400 | 16.09368600 | C | 9.95861800  | 11.45806900 | 10.97463100 |
| H            | 9.09980200 | 11.74870900 | 16.92128700 | H | 10.94173100 | 11.35863700 | 11.46104000 |
| H            | 9.66130100 | 11.04988300 | 15.38486700 | H | 10.00710200 | 10.94141000 | 10.00425800 |
| H            | 7.96124600 | 11.52926600 | 15.56376100 | H | 9.76446600  | 12.52182000 | 10.78464600 |
| Sn           | 6.77168900 | 6.14992100  | 14.24414800 | C | 9.03710200  | 9.30963600  | 11.88659200 |
| O            | 4.50567000 | 4.92954300  | 12.27734500 | H | 9.02544000  | 8.91401500  | 10.86096700 |
| C            | 3.42993400 | 4.17896000  | 11.83878700 | H | 9.99057000  | 9.01793500  | 12.34993400 |
| H            | 2.46568300 | 4.73039600  | 11.85831700 | H | 8.21516200  | 8.82048500  | 12.42909600 |
| H            | 3.54458000 | 3.80143400  | 10.79104100 | C | 9.42567100  | 10.77892700 | 14.38504500 |
| H            | 3.28502600 | 3.27190000  | 12.46849700 | H | 10.51148000 | 10.76844500 | 14.20097200 |
|              |            |             |             | H | 9.24255500  | 11.30392000 | 15.33432600 |
|              |            |             |             | H | 9.07777300  | 9.74810900  | 14.50019300 |
| <b>I-6b'</b> |            |             |             | C | 9.00689900  | 12.98322100 | 13.27026900 |
| Cu           | 5.09076100 | 6.24608900  | 11.73868000 | H | 8.64219800  | 13.40887200 | 14.21665000 |
| C            | 1.51017000 | 4.39645900  | 8.74400700  | H | 10.08835200 | 13.17238200 | 13.19647200 |
| C            | 1.69902900 | 3.62995600  | 7.58025700  | H | 8.50132100  | 13.50517700 | 12.44446000 |
| C            | 2.93250300 | 3.72791900  | 6.96425200  | H | 0.56113800  | 9.61857300  | 15.19693600 |
| C            | 3.95190000 | 4.52403900  | 7.49606300  | H | 2.92630900  | 9.76141000  | 14.40486900 |
| C            | 3.81189600 | 5.27140600  | 8.65960900  | H | 2.94397500  | 5.50926500  | 13.74388600 |
| C            | 2.51766100 | 5.21317000  | 9.24869200  | H | 0.61771100  | 5.36702800  | 14.45870200 |
| O            | 0.82094800 | 5.46870800  | 11.29718600 | H | 0.61771100  | 5.36702800  | 14.45870200 |
| P            | 5.25190800 | 6.06331700  | 9.49457900  | O | -0.88046000 | 7.51810800  | 15.28080200 |
| B            | 6.66427800 | 11.20346000 | 12.24847100 | C | -1.62221700 | 6.32983100  | 15.16879800 |
| S            | 2.06783000 | 6.15032400  | 10.75859900 | H | -1.61821100 | 5.93901200  | 14.13488700 |
| O            | 5.04741300 | 4.43915000  | 6.68739000  | H | -2.65471600 | 6.57154400  | 15.46019900 |
| O            | 3.37103300 | 3.11968000  | 5.82253700  | H | -1.24102400 | 5.53637100  | 15.83881800 |
| H            | 0.91540500 | 2.98457700  | 7.18049600  | C | 1.10340400  | 8.72470500  | 14.88091900 |
| H            | 0.57581700 | 4.35395000  | 9.30737000  | C | 2.42065600  | 8.79467100  | 14.44095800 |

|   |            |             |             |   |             |             |             |
|---|------------|-------------|-------------|---|-------------|-------------|-------------|
| C | 3.11539500 | 7.64229800  | 14.01821900 | H | 7.93912600  | 6.30904600  | 8.19270100  |
| C | 2.44404800 | 6.41606300  | 14.08656300 | C | 8.81754200  | 3.11407400  | 8.98385300  |
| C | 1.11168000 | 6.33633200  | 14.49784100 | H | 7.51135600  | 1.67223200  | 9.93432700  |
| C | 0.42969700 | 7.49287500  | 14.88961800 | H | 9.86062800  | 4.76290800  | 8.04729200  |
| C | 4.49274900 | 7.75229700  | 13.45868200 | H | 9.67025700  | 2.43249200  | 8.92697200  |
| C | 4.69769800 | 8.61814400  | 12.48549800 | C | 8.40845200  | 7.21383700  | 15.20273900 |
| C | 4.84624700 | 9.62708500  | 11.64435700 | H | 8.83508400  | 6.20052300  | 15.11458600 |
| C | 5.11564000 | 11.07013900 | 12.05813200 | H | 8.86643700  | 7.80105000  | 14.39395900 |
| H | 4.59528600 | 11.32276100 | 12.99388700 | C | 8.74642400  | 7.80584800  | 16.56617800 |
| H | 4.74926500 | 11.75001500 | 11.27092700 | H | 8.30798000  | 8.81439600  | 16.66334600 |
| H | 4.86415300 | 9.43590900  | 10.56988100 | H | 8.27413700  | 7.20838100  | 17.36756600 |
| C | 4.77746300 | 3.41474600  | 5.70552700  | C | 10.25090900 | 7.90042300  | 16.84976700 |
| C | 5.08178200 | 3.97307500  | 4.32457200  | H | 10.73028900 | 8.48974900  | 16.04678800 |
| C | 6.57976500 | 4.25571400  | 4.16816400  | H | 10.69562600 | 6.89067400  | 16.78346600 |
| C | 7.41386400 | 3.00544600  | 4.47103100  | C | 10.57772800 | 8.52317500  | 18.20700900 |
| C | 7.09833000 | 2.45598100  | 5.86597000  | H | 10.13309400 | 7.93827000  | 19.03013300 |
| C | 5.60302500 | 2.17651500  | 6.03768100  | H | 11.66444500 | 8.58052100  | 18.38680600 |
| H | 6.78534700 | 4.62679200  | 3.15077800  | H | 10.17184500 | 9.54662400  | 18.28045300 |
| H | 4.74696000 | 3.22777600  | 3.58395900  | C | 5.44129200  | 8.30458400  | 16.37855700 |
| H | 4.47715400 | 4.88152100  | 4.17935900  | H | 5.97001000  | 8.08204400  | 17.32122500 |
| H | 7.20231300 | 2.23234100  | 3.70815900  | H | 4.38104100  | 8.04389800  | 16.52727500 |
| H | 8.48819800 | 3.23977800  | 4.39175600  | C | 5.58653100  | 9.77458100  | 16.00058000 |
| H | 7.67535900 | 1.53922800  | 6.06561200  | H | 5.14926000  | 9.94619900  | 15.00309100 |
| H | 7.40695800 | 3.18852200  | 6.62492500  | H | 6.65227300  | 10.03710400 | 15.87737100 |
| H | 5.26929000 | 1.36746100  | 5.36601200  | C | 4.94967500  | 10.76860500 | 16.97660200 |
| H | 5.37282000 | 1.87341700  | 7.07055200  | H | 3.88119500  | 10.51357000 | 17.09991700 |
| H | 6.86104300 | 5.06068600  | 4.86742100  | H | 5.40615200  | 10.64486800 | 17.97646100 |
| C | 5.73115300 | 7.48726900  | 8.43920800  | C | 5.08511400  | 12.22153600 | 16.51907500 |
| C | 6.54263300 | 8.45415500  | 9.05508700  | H | 4.59333200  | 12.37402000 | 15.54360300 |
| C | 5.34123500 | 7.66916300  | 7.10422800  | H | 4.63653400  | 12.92899600 | 17.23698200 |
| C | 6.95537200 | 9.58885800  | 8.35177800  | H | 6.14435200  | 12.49777900 | 16.38401600 |
| H | 6.82596800 | 8.32319400  | 10.10141500 | C | 5.77594900  | 4.89920800  | 15.36155600 |
| C | 5.75301000 | 8.80420000  | 6.40183700  | H | 5.89191700  | 4.83687500  | 16.45861100 |
| H | 4.72103900 | 6.92060300  | 6.61133200  | H | 4.71485300  | 4.72004700  | 15.13325300 |
| C | 6.55853900 | 9.76514500  | 7.02316500  | C | 6.64648400  | 3.87148900  | 14.64268600 |
| H | 7.54741100 | 10.34447400 | 8.87041100  | H | 6.57084600  | 4.04423200  | 13.55983900 |
| H | 5.43955100 | 8.94078200  | 5.36320000  | H | 7.71115400  | 4.01292300  | 14.91035900 |
| H | 6.86778000 | 10.65800300 | 6.47313200  | C | 6.24664000  | 2.41790400  | 14.90630100 |
| C | 6.63040300 | 4.87771200  | 9.15698400  | H | 5.17341300  | 2.31261000  | 14.67416300 |
| C | 6.52269500 | 3.56066900  | 9.63379200  | H | 6.36573600  | 2.18023900  | 15.98087900 |
| C | 7.83735500 | 5.29312100  | 8.57505900  | C | 7.04084600  | 1.42968700  | 14.05278800 |
| C | 7.60881300 | 2.68811700  | 9.54270900  | H | 6.74851100  | 0.38356800  | 14.24670900 |
| H | 5.60128500 | 3.23784700  | 10.12361000 | H | 6.87073800  | 1.63561300  | 12.98302200 |
| C | 8.92427500 | 4.41836700  | 8.49444700  | H | 8.12595600  | 1.51507600  | 14.23976100 |

|             |             |             |             |   |             |             |             |
|-------------|-------------|-------------|-------------|---|-------------|-------------|-------------|
| Sn          | 6.23511800  | 6.94931000  | 14.77671200 | H | 0.66390800  | 14.07673600 | 7.96790400  |
| O           | 6.91470900  | 6.58675900  | 12.64899200 | C | -0.56681100 | 11.44072200 | 9.85895500  |
| C           | 8.06817000  | 5.97036300  | 12.17529400 | H | -0.75818100 | 12.07443000 | 10.73606000 |
| H           | 8.94165400  | 6.13723200  | 12.83531900 | H | -1.52146500 | 11.26910200 | 9.34000300  |
| H           | 7.95598700  | 4.87308500  | 12.05826000 | H | -0.18057200 | 10.48163600 | 10.22762500 |
| H           | 8.34985300  | 6.36270100  | 11.17561700 | C | 0.04568100  | 10.16152400 | 7.31337700  |
| Br          | 4.13548300  | 3.92438500  | 12.12149600 | H | -0.84097600 | 10.64126800 | 6.87070300  |
|             |             |             |             | H | 0.52912300  | 9.55102700  | 6.53653600  |
| <b>I-8a</b> |             |             |             | H | -0.28113500 | 9.49454700  | 8.11793100  |
| Cu          | 4.14949000  | 8.10045600  | 10.44167200 | C | 1.60059100  | 11.99853200 | 6.64344700  |
| C           | 2.98465200  | 3.54115200  | 10.04042200 | H | 2.13501100  | 11.30129900 | 5.98317500  |
| C           | 3.63480000  | 2.44536800  | 9.44795800  | H | 0.81251700  | 12.49057800 | 6.05512900  |
| C           | 4.70107400  | 2.72634200  | 8.61163400  | H | 2.31195100  | 12.76410700 | 6.98569900  |
| C           | 5.11404900  | 4.04083500  | 8.36550100  | H | -2.65906200 | 10.81470800 | 14.31468900 |
| C           | 4.50243900  | 5.14716000  | 8.94201100  | H | -0.48125200 | 11.32389500 | 13.19483500 |
| C           | 3.39815300  | 4.84650700  | 9.78304100  | H | 0.54317600  | 7.14102600  | 13.33523100 |
| O           | 1.88207100  | 5.53957900  | 11.87363000 | H | -1.57388300 | 6.64504400  | 14.48354500 |
| P           | 5.16488800  | 6.86849000  | 8.84388200  | O | -3.46626000 | 8.53640400  | 15.08748000 |
| B           | 2.51790700  | 11.36751700 | 9.54614600  | C | -3.83657700 | 7.24397500  | 15.49752200 |
| S           | 2.49880200  | 6.18042900  | 10.63556200 | H | -3.90877700 | 6.54410500  | 14.64445500 |
| O           | 6.17952700  | 4.02183100  | 7.52470400  | H | -4.82510900 | 7.33242300  | 15.96858400 |
| O           | 5.51326000  | 1.85910400  | 7.95262200  | H | -3.12602600 | 6.82437500  | 16.23339300 |
| H           | 3.33196700  | 1.41803100  | 9.65121100  | C | -1.94038600 | 10.02249100 | 14.09537800 |
| H           | 2.16239200  | 3.38746600  | 10.74010100 | C | -0.73155700 | 10.29787600 | 13.47043700 |
| C           | 1.05878500  | 6.45369100  | 9.41580400  | C | 0.20040300  | 9.27168600  | 13.18485300 |
| C           | 0.18586000  | 7.48921000  | 10.12044100 | C | -0.14420400 | 7.95755400  | 13.56527400 |
| H           | -0.21439100 | 7.09935400  | 11.06413400 | C | -1.35257000 | 7.67579300  | 14.20659300 |
| H           | -0.66483600 | 7.74002300  | 9.46755700  | C | -2.26283000 | 8.70856900  | 14.47420900 |
| H           | 0.74696200  | 8.40706500  | 10.33954400 | C | 1.44026900  | 9.55099700  | 12.54112900 |
| C           | 0.30556700  | 5.14387000  | 9.22940100  | C | 2.51892100  | 9.72427500  | 11.98316800 |
| H           | 0.87025400  | 4.41816300  | 8.62805700  | C | 3.75492900  | 9.89113400  | 11.27903400 |
| H           | -0.64187600 | 5.35428900  | 8.70716800  | C | 3.81271300  | 11.16788400 | 10.40158100 |
| H           | 0.06259700  | 4.69673400  | 10.20482600 | H | 4.69240900  | 11.11604400 | 9.73554200  |
| C           | 1.64311300  | 6.99960700  | 8.12069500  | H | 3.93939800  | 12.07406700 | 11.02504000 |
| H           | 2.16074200  | 7.95452400  | 8.28592400  | H | 4.58563900  | 9.91588400  | 12.00743800 |
| H           | 0.81901500  | 7.19028300  | 7.41544800  | C | 6.56896900  | 2.63605900  | 7.33910300  |
| H           | 2.32914300  | 6.28909800  | 7.63857500  | C | 6.63818000  | 2.33926500  | 5.85135900  |
| C           | 1.02014000  | 11.21339000 | 7.82274000  | C | 7.77815600  | 3.11878400  | 5.18494100  |
| C           | 0.45217200  | 12.14383000 | 8.95863600  | C | 9.11488900  | 2.86651100  | 5.89148500  |
| O           | 1.62726600  | 12.38829200 | 9.75866700  | C | 9.02001900  | 3.18938000  | 7.38615800  |
| O           | 2.12992200  | 10.56396000 | 8.48926800  | C | 7.89028600  | 2.40185400  | 8.05810200  |
| C           | -0.10293200 | 13.47816900 | 8.47619300  | H | 7.84027600  | 2.84284300  | 4.12047800  |
| H           | -0.94842400 | 13.32492300 | 7.78735300  | H | 6.79620700  | 1.25400500  | 5.74109700  |
| H           | -0.46561200 | 14.05699100 | 9.33835100  | H | 5.66147200  | 2.57860600  | 5.40339600  |

|   |             |             |             |              |            |             |             |
|---|-------------|-------------|-------------|--------------|------------|-------------|-------------|
| H | 9.40359000  | 1.80759500  | 5.75908400  | H            | 2.69457300 | 7.37302700  | 13.86283000 |
| H | 9.90935300  | 3.46902600  | 5.42279900  | C            | 3.94202700 | 8.73188100  | 15.02715400 |
| H | 9.97293500  | 2.97476500  | 7.89445800  | H            | 4.21148200 | 9.30195700  | 14.12313800 |
| H | 8.82923400  | 4.26510800  | 7.52153700  | H            | 4.85549500 | 8.68708300  | 15.64985200 |
| H | 8.09437200  | 1.31871100  | 8.03326200  | C            | 2.85930100 | 9.50328100  | 15.78832000 |
| H | 7.77249100  | 2.69404100  | 9.11208800  | H            | 1.91712200 | 9.44212300  | 15.22321200 |
| H | 7.54533800  | 4.19650300  | 5.22021000  | H            | 2.67314900 | 9.00344900  | 16.75688100 |
| C | 4.95361300  | 7.43280800  | 7.11161800  | C            | 3.22041100 | 10.96958400 | 16.01276000 |
| C | 4.47854600  | 8.74064200  | 6.92917800  | H            | 3.33636700 | 11.49032900 | 15.04812500 |
| C | 5.27339400  | 6.64955400  | 5.98910500  | H            | 2.43944800 | 11.49623900 | 16.58426600 |
| C | 4.34051000  | 9.26273100  | 5.63972500  | H            | 4.16930000 | 11.07435900 | 16.56688200 |
| H | 4.19550200  | 9.34372600  | 7.79438800  | C            | 4.60991600 | 4.07830800  | 13.27144700 |
| C | 5.11887400  | 7.17190700  | 4.70432100  | H            | 4.55520000 | 3.59553200  | 14.26383500 |
| H | 5.65330300  | 5.63762900  | 6.12363700  | H            | 3.59412400 | 4.07416000  | 12.85224300 |
| C | 4.65723200  | 8.48119000  | 4.52689400  | C            | 5.60030400 | 3.33395100  | 12.37455200 |
| H | 3.97972800  | 10.28489900 | 5.51143900  | H            | 5.49409000 | 3.68994300  | 11.33791600 |
| H | 5.36619400  | 6.55577700  | 3.83609900  | H            | 6.64137500 | 3.55519200  | 12.66460800 |
| H | 4.54453400  | 8.89004800  | 3.51968000  | C            | 5.40566200 | 1.81461000  | 12.40527900 |
| C | 6.97216800  | 6.57179200  | 8.98661200  | H            | 4.36406200 | 1.57993400  | 12.12552800 |
| C | 7.45686700  | 5.70770700  | 9.98172700  | H            | 5.52248800 | 1.46448000  | 13.44678400 |
| C | 7.88645700  | 7.28089200  | 8.19489900  | C            | 6.37261400 | 1.05648400  | 11.49790000 |
| C | 8.82847500  | 5.54795500  | 10.17200000 | H            | 6.24730600 | -0.03405300 | 11.59166300 |
| H | 6.75634200  | 5.17384800  | 10.62017500 | H            | 6.22052200 | 1.31490500  | 10.43938900 |
| C | 9.26209400  | 7.12435400  | 8.39345300  | H            | 7.42054200 | 1.29277700  | 11.74953600 |
| H | 7.52566800  | 7.95737700  | 7.41790600  | Sn           | 5.07439300 | 6.14444300  | 13.74443200 |
| C | 9.73795300  | 6.25862900  | 9.38090900  | O            | 5.60319800 | 7.08390800  | 11.98287400 |
| H | 9.18960300  | 4.86753700  | 10.94703400 | C            | 6.64650000 | 8.03441700  | 12.04850600 |
| H | 9.96378500  | 7.68308500  | 7.76939800  | H            | 6.46031800 | 8.81942300  | 12.80504200 |
| H | 10.81275600 | 6.13536500  | 9.53306000  | H            | 7.62375400 | 7.56837600  | 12.26748400 |
| C | 6.94911800  | 6.28747100  | 14.85702800 | H            | 6.73380800 | 8.53932000  | 11.07233700 |
| H | 7.22146100  | 7.35538900  | 14.87649900 |              |            |             |             |
| H | 6.74768300  | 6.00086100  | 15.90316700 | <b>I-8a'</b> |            |             |             |
| C | 8.08687100  | 5.44946500  | 14.26779000 | Cu           | 3.99906500 | 7.34303900  | 11.09649800 |
| H | 7.85048000  | 4.37532500  | 14.37069900 | C            | 1.87632900 | 3.17893200  | 8.92789800  |
| H | 8.16792900  | 5.63059700  | 13.18132500 | C            | 2.55124400 | 2.19061400  | 8.19221400  |
| C | 9.45337900  | 5.71802200  | 14.90504300 | C            | 3.78668200 | 2.53596400  | 7.67696600  |
| H | 9.39499600  | 5.51586900  | 15.98967300 | C            | 4.34443000 | 3.79769900  | 7.90281300  |
| H | 9.68586000  | 6.79401100  | 14.81097500 | C            | 3.72014700 | 4.79150700  | 8.65112900  |
| C | 10.57672800 | 4.89196100  | 14.28006100 | C            | 2.42588300 | 4.44328200  | 9.12738400  |
| H | 10.67624600 | 5.11105200  | 13.20334100 | O            | 0.32598400 | 4.64922900  | 10.73889200 |
| H | 11.54986600 | 5.09945700  | 14.75251300 | P            | 4.59286300 | 6.33387000  | 9.18324800  |
| H | 10.38097600 | 3.81097200  | 14.37956200 | B            | 2.78582900 | 11.10296900 | 10.29457000 |
| C | 3.49476900  | 7.32930900  | 14.61356000 | S            | 1.37930300 | 5.56699200  | 10.13605700 |
| H | 3.10691300  | 6.75619800  | 15.47345000 | O            | 5.55301200 | 3.86271500  | 7.26886800  |

|   |             |             |             |   |             |             |             |
|---|-------------|-------------|-------------|---|-------------|-------------|-------------|
| O | 4.63551900  | 1.78143600  | 6.91886500  | H | -3.27265300 | 4.27730600  | 14.01034700 |
| H | 2.12931100  | 1.19660700  | 8.03628800  | C | -2.52265900 | 8.12524300  | 12.94479700 |
| H | 0.90864000  | 2.98207800  | 9.39402900  | C | -1.33113900 | 8.84095200  | 12.87759000 |
| C | 0.42494600  | 6.46864300  | 8.74347300  | C | -0.07833700 | 8.18422800  | 12.90713800 |
| C | -0.49270800 | 7.40054500  | 9.54028800  | C | -0.08373100 | 6.78101000  | 13.06027200 |
| H | -1.13117000 | 6.83586900  | 10.23363300 | C | -1.27392200 | 6.06062400  | 13.13412400 |
| H | -1.14153000 | 7.95963600  | 8.84588800  | C | -2.50438000 | 6.72701200  | 13.06201800 |
| H | 0.09298600  | 8.11921400  | 10.13092000 | C | 1.16087600  | 8.86290000  | 12.71352200 |
| C | -0.37712000 | 5.44893300  | 7.94930700  | C | 2.31539700  | 9.05750700  | 12.32133400 |
| H | 0.26874400  | 4.83139500  | 7.30760900  | C | 3.64611100  | 9.22878300  | 11.86873700 |
| H | -1.10395100 | 5.97173100  | 7.30431900  | C | 3.97557100  | 10.55774200 | 11.15006300 |
| H | -0.92888000 | 4.79007300  | 8.63640400  | H | 4.87593100  | 10.43798300 | 10.52099100 |
| C | 1.40515800  | 7.25359300  | 7.88712600  | H | 4.22446400  | 11.34625800 | 11.88862000 |
| H | 1.99363800  | 7.96316700  | 8.48615300  | H | 4.35195500  | 9.07556800  | 12.69640100 |
| H | 0.84646800  | 7.84084300  | 7.14034400  | C | 5.84603400  | 2.54606000  | 6.75429300  |
| H | 2.08996000  | 6.59459300  | 7.33667600  | C | 6.18973400  | 2.66532000  | 5.27712000  |
| C | 1.40906100  | 11.51223200 | 8.51423500  | C | 7.49804300  | 3.43799300  | 5.07792400  |
| C | 0.88286300  | 12.25824900 | 9.79584000  | C | 8.64192100  | 2.80592600  | 5.87931800  |
| O | 2.02327600  | 12.18426700 | 10.67242900 | C | 8.28117700  | 2.70152700  | 7.36454300  |
| O | 2.37857000  | 10.60185100 | 9.07345800  | C | 6.97446300  | 1.93188600  | 7.57502700  |
| C | 0.51803500  | 13.72233100 | 9.58218900  | H | 7.74714600  | 3.47907400  | 4.00491200  |
| H | -0.29286800 | 13.81982800 | 8.84288500  | H | 6.27827900  | 1.64252300  | 4.87448400  |
| H | 0.16931700  | 14.15519400 | 10.53178800 | H | 5.34486200  | 3.15139900  | 4.76514600  |
| H | 1.38101800  | 14.30919200 | 9.24091200  | H | 8.85765600  | 1.79876600  | 5.47508000  |
| C | -0.26476100 | 11.51684800 | 10.48535900 | H | 9.56297000  | 3.39879300  | 5.75500200  |
| H | -0.42322000 | 11.96274000 | 11.47768600 | H | 9.09338900  | 2.22114100  | 7.93265400  |
| H | -1.20195900 | 11.58590400 | 9.91277600  | H | 8.16405100  | 3.71091800  | 7.78381100  |
| H | -0.01466700 | 10.45969600 | 10.64243500 | H | 7.07731400  | 0.87933500  | 7.26104400  |
| C | 0.34835300  | 10.72735700 | 7.75627500  | H | 6.67665700  | 1.94010100  | 8.63459200  |
| H | -0.44687500 | 11.40045000 | 7.39823200  | H | 7.35059500  | 4.47823500  | 5.41323400  |
| H | 0.80288800  | 10.23521200 | 6.88414800  | C | 4.72985200  | 7.36941600  | 7.66470500  |
| H | -0.10069400 | 9.95255700  | 8.38585600  | C | 4.66533900  | 8.75455700  | 7.86147800  |
| C | 2.16251700  | 12.43431500 | 7.54963800  | C | 4.91347900  | 6.86805300  | 6.36539400  |
| H | 2.66215900  | 11.81606100 | 6.79011100  | C | 4.79608700  | 9.63157800  | 6.78134400  |
| H | 1.48310500  | 13.13165200 | 7.03676800  | H | 4.48082900  | 9.13542000  | 8.86613700  |
| H | 2.93079100  | 13.01793600 | 8.07806500  | C | 5.03127900  | 7.74517800  | 5.28558900  |
| H | -3.49075300 | 8.62983800  | 12.89965000 | H | 4.98012000  | 5.79308800  | 6.20165800  |
| H | -1.35613600 | 9.92782300  | 12.77989300 | C | 4.97758100  | 9.12934400  | 5.49112600  |
| H | 0.86759000  | 6.24606300  | 13.06925700 | H | 4.73828500  | 10.70765600 | 6.95599500  |
| H | -1.21302800 | 4.97479900  | 13.18519800 | H | 5.17014300  | 7.34655400  | 4.27679100  |
| O | -3.72351700 | 6.10008800  | 13.09313800 | H | 5.07178200  | 9.81298900  | 4.64291600  |
| C | -3.73876800 | 4.69680700  | 13.09852900 | C | 6.32353400  | 5.74393300  | 9.39508500  |
| H | -3.21415500 | 4.27341800  | 12.22193000 | C | 6.56538600  | 4.70187600  | 10.30348400 |
| H | -4.79454700 | 4.38940200  | 13.06896200 | C | 7.41152700  | 6.41258600  | 8.81839300  |

|   |             |             |             |             |             |             |             |
|---|-------------|-------------|-------------|-------------|-------------|-------------|-------------|
| C | 7.87186400  | 4.32392500  | 10.60813400 | H           | 7.18620300  | 0.07153600  | 13.60575500 |
| H | 5.72024800  | 4.21794400  | 10.79781900 | H           | 6.59553800  | 1.16597100  | 12.33128400 |
| C | 8.72161100  | 6.05008200  | 9.14812600  | H           | 8.23664200  | 1.36585600  | 12.98175000 |
| H | 7.23905200  | 7.23018800  | 8.11701500  | Sn          | 5.93375800  | 6.60315400  | 14.17416400 |
| C | 8.95658100  | 5.00448000  | 10.04304300 | O           | 6.13463300  | 7.09748500  | 12.16985500 |
| H | 8.04531200  | 3.50813600  | 11.31089800 | C           | 6.93197200  | 8.17934500  | 11.78230400 |
| H | 9.56030600  | 6.58985600  | 8.70023200  | H           | 6.69396600  | 9.11860300  | 12.32133500 |
| H | 9.97941200  | 4.71704600  | 10.30001600 | H           | 8.01569300  | 7.98614200  | 11.90464700 |
| C | 7.92209100  | 7.38951900  | 14.74992700 | H           | 6.76032500  | 8.37967200  | 10.70925800 |
| H | 8.01183100  | 8.43418000  | 14.40979900 | Br          | 3.58623900  | 5.22986600  | 12.60375600 |
| H | 7.99247300  | 7.40939500  | 15.85218100 |             |             |             |             |
| C | 9.03349200  | 6.52503700  | 14.14808700 | <b>I-8b</b> |             |             |             |
| H | 9.00761500  | 5.51858500  | 14.60503900 | Cu          | 5.29777600  | 7.37076000  | 10.89141100 |
| H | 8.84174500  | 6.35753500  | 13.07266700 | C           | 3.54396700  | 2.67428300  | 10.42398600 |
| C | 10.44736500 | 7.09535700  | 14.29895500 | C           | 3.87559500  | 1.69897800  | 9.46888500  |
| H | 10.67067700 | 7.24435700  | 15.37161600 | C           | 4.54479900  | 2.13250800  | 8.33758000  |
| H | 10.47538400 | 8.10200800  | 13.84334400 | C           | 4.88460700  | 3.47889300  | 8.15688400  |
| C | 11.51995400 | 6.21321100  | 13.65974600 | C           | 4.58244700  | 4.46928700  | 9.08477500  |
| H | 11.32123700 | 6.07340400  | 12.58356100 | C           | 3.86745100  | 4.01528300  | 10.22568300 |
| H | 12.52938900 | 6.64511500  | 13.76226400 | O           | 3.26251700  | 4.25089500  | 12.80476400 |
| H | 11.53660000 | 5.21044500  | 14.12002200 | P           | 5.24687300  | 6.18747500  | 8.99894900  |
| C | 4.36030800  | 7.79393200  | 15.08579100 | B           | 5.45766800  | 11.16292900 | 13.12211400 |
| H | 4.05786800  | 7.27579200  | 16.01196600 | S           | 3.43796600  | 5.14711200  | 11.58102600 |
| H | 3.51037200  | 7.72359200  | 14.39299400 | O           | 5.54790800  | 3.61387000  | 6.97874200  |
| C | 4.73545300  | 9.24997400  | 15.36212000 | O           | 4.99391300  | 1.40072100  | 7.28558700  |
| H | 5.19014300  | 9.70120400  | 14.46250200 | H           | 3.63931800  | 0.64473600  | 9.61656700  |
| H | 5.51341100  | 9.30700800  | 16.14696900 | H           | 3.05527000  | 2.40042800  | 11.36013600 |
| C | 3.53021600  | 10.10794800 | 15.76214100 | C           | 1.67215200  | 5.67326200  | 11.10147900 |
| H | 2.75786000  | 10.01009700 | 14.98063600 | C           | 1.22229500  | 6.49836300  | 12.30895600 |
| H | 3.08474700  | 9.69742900  | 16.68735700 | H           | 1.18392900  | 5.87772800  | 13.21487000 |
| C | 3.87991900  | 11.58173300 | 15.96107700 | H           | 0.21891200  | 6.90526100  | 12.11208500 |
| H | 4.27972500  | 12.01804400 | 15.03003800 | H           | 1.89131400  | 7.35113900  | 12.48223100 |
| H | 2.99712000  | 12.17507700 | 16.25084600 | C           | 0.80871400  | 4.43155800  | 10.93319500 |
| H | 4.64670700  | 11.71589900 | 16.74460300 | H           | 1.06358400  | 3.86942600  | 10.02362900 |
| C | 6.09843600  | 4.52767700  | 14.84850800 | H           | -0.24635400 | 4.74129400  | 10.85878400 |
| H | 6.73901800  | 4.55895100  | 15.74907300 | H           | 0.90994800  | 3.77038100  | 11.80674400 |
| H | 5.08055600  | 4.24493100  | 15.15664200 | C           | 1.76125100  | 6.52043900  | 9.84171300  |
| C | 6.63808900  | 3.53698700  | 13.82555600 | H           | 2.43490100  | 7.37519800  | 9.98758300  |
| H | 6.01343400  | 3.59873200  | 12.92102000 | H           | 0.76497900  | 6.92982600  | 9.61310900  |
| H | 7.65952200  | 3.82631200  | 13.52374300 | H           | 2.09532500  | 5.93671900  | 8.97209200  |
| C | 6.65623300  | 2.08399400  | 14.30869000 | C           | 5.11062500  | 13.42283500 | 13.11638200 |
| H | 5.62947200  | 1.78994600  | 14.59079600 | C           | 4.18943200  | 12.73105900 | 14.19782200 |
| H | 7.26031800  | 2.00624300  | 15.23201700 | O           | 4.76359600  | 11.40488700 | 14.28540700 |
| C | 7.19651800  | 1.11682400  | 13.25484400 | O           | 5.61251800  | 12.29773000 | 12.36704000 |



|   |             |             |             |   |             |             |             |
|---|-------------|-------------|-------------|---|-------------|-------------|-------------|
| C | 4.22705500  | 13.38236000 | 15.57501500 | H | 5.88745400  | 2.99941300  | 3.07711400  |
| H | 3.89537300  | 14.43079000 | 15.51778500 | H | 5.40421900  | 1.16104900  | 4.70107000  |
| H | 3.54899300  | 12.84838600 | 16.25636900 | H | 4.27606300  | 2.50481800  | 4.97996600  |
| H | 5.23466700  | 13.35530400 | 16.00940100 | H | 7.87469900  | 1.73967300  | 3.89402400  |
| C | 2.74093900  | 12.55915500 | 13.73453900 | H | 8.30315900  | 3.43951000  | 3.65676500  |
| H | 2.21493000  | 11.91482800 | 14.45287600 | H | 9.19646100  | 2.56737700  | 5.84734200  |
| H | 2.21290300  | 13.52283400 | 13.68600900 | H | 8.05062200  | 3.88590400  | 6.09207900  |
| H | 2.69172500  | 12.07026300 | 12.75217900 | H | 7.41009200  | 0.88889300  | 6.38353100  |
| C | 4.37698000  | 14.35651100 | 12.16105800 | H | 7.53819500  | 2.07766200  | 7.69963300  |
| H | 3.90198200  | 15.18538600 | 12.70873300 | H | 6.04706900  | 4.15888700  | 4.40390000  |
| H | 5.09193000  | 14.78469600 | 11.44257700 | C | 4.37620300  | 7.02087800  | 7.61558200  |
| H | 3.60703500  | 13.81951200 | 11.59313700 | C | 3.93227900  | 8.33283400  | 7.84450000  |
| C | 6.32436000  | 14.13318300 | 13.72188200 | C | 4.12928800  | 6.41463400  | 6.37226800  |
| H | 7.01644000  | 14.40234800 | 12.91046600 | C | 3.24863100  | 9.02991900  | 6.84490400  |
| H | 6.03812200  | 15.05186800 | 14.25495800 | H | 4.10552100  | 8.79688500  | 8.81742200  |
| H | 6.86155800  | 13.47564900 | 14.42080300 | C | 3.44255100  | 7.11452300  | 5.37835600  |
| H | -1.53342600 | 9.88183200  | 9.15200200  | H | 4.47946400  | 5.40044600  | 6.18190700  |
| H | 0.95761000  | 9.75697500  | 9.20837900  | C | 3.00050100  | 8.42152600  | 5.61220200  |
| H | 0.84205000  | 9.88947300  | 13.51388900 | H | 2.90473500  | 10.04873000 | 7.03827700  |
| H | -1.61217500 | 10.01438200 | 13.45961100 | H | 3.25025500  | 6.63625300  | 4.41464300  |
| O | -3.09575000 | 10.00840600 | 11.15027300 | H | 2.46065800  | 8.96389200  | 4.83206300  |
| C | -3.88953200 | 10.07654600 | 12.30767300 | C | 6.95101700  | 5.89465600  | 8.38715000  |
| H | -3.75209000 | 9.19138300  | 12.95640600 | C | 7.76293300  | 4.99839800  | 9.10183700  |
| H | -4.93542700 | 10.11228700 | 11.97339500 | C | 7.50532100  | 6.62964300  | 7.33090700  |
| H | -3.67440900 | 10.98235500 | 12.90445000 | C | 9.10085700  | 4.82552300  | 8.75116800  |
| C | -0.99405500 | 9.88390500  | 10.10149400 | H | 7.34722000  | 4.44435300  | 9.94398900  |
| C | 0.39188400  | 9.81966200  | 10.14008900 | C | 8.85188000  | 6.46349600  | 6.99067800  |
| C | 1.09714300  | 9.81737700  | 11.37019300 | H | 6.88484400  | 7.33209900  | 6.77151400  |
| C | 0.32959300  | 9.89597100  | 12.55128200 | C | 9.65220500  | 5.56183600  | 7.69636400  |
| C | -1.06519700 | 9.96007000  | 12.51831400 | H | 9.71870800  | 4.11961600  | 9.31161100  |
| C | -1.74107900 | 9.95239500  | 11.28986300 | H | 9.27512700  | 7.04193800  | 6.16588500  |
| C | 2.51031700  | 9.70004600  | 11.40329400 | H | 10.70247900 | 5.43143700  | 7.42559000  |
| C | 3.73128400  | 9.55288400  | 11.40067300 | C | 7.73115300  | 6.71257800  | 15.38641200 |
| C | 5.13926900  | 9.33749500  | 11.37179700 | H | 7.90091600  | 7.74946000  | 15.05143900 |
| C | 5.92657000  | 9.74617600  | 12.64907400 | H | 7.31965800  | 6.78263600  | 16.40784000 |
| H | 7.00104800  | 9.74320900  | 12.40452800 | C | 9.02927000  | 5.90410500  | 15.37407200 |
| H | 5.78803100  | 9.01576700  | 13.45896400 | H | 8.82920400  | 4.86461500  | 15.69262700 |
| H | 5.56750300  | 9.85918600  | 10.49842400 | H | 9.41569100  | 5.82581500  | 14.34221400 |
| C | 5.79687900  | 2.27796600  | 6.46545900  | C | 10.12675400 | 6.49352800  | 16.26612900 |
| C | 5.33695800  | 2.21392800  | 5.02024100  | H | 9.74697600  | 6.56867100  | 17.30104000 |
| C | 6.20821100  | 3.10364400  | 4.12563100  | H | 10.33006800 | 7.53091400  | 15.94487700 |
| C | 7.69480600  | 2.76128800  | 4.27641200  | C | 11.42161000 | 5.68282400  | 16.24691700 |
| C | 8.13662200  | 2.84665200  | 5.74103800  | H | 11.83795400 | 5.62125400  | 15.22738400 |
| C | 7.27489400  | 1.95306600  | 6.63821200  | H | 12.19199400 | 6.12990500  | 16.89497100 |

|              |             |             |             |   |             |             |             |
|--------------|-------------|-------------|-------------|---|-------------|-------------|-------------|
| H            | 11.25102000 | 4.65014600  | 16.59481400 | B | 3.32633800  | 11.36428000 | 12.06094500 |
| C            | 4.25898600  | 6.92023200  | 14.35784800 | S | 1.45304200  | 5.98866200  | 9.75148100  |
| H            | 3.48671500  | 6.14282000  | 14.42842800 | O | 5.47425500  | 4.05732700  | 6.81471600  |
| H            | 4.11960900  | 7.42812800  | 13.39106200 | O | 4.30680300  | 2.17122100  | 6.20605300  |
| C            | 4.17927700  | 7.92513600  | 15.50521800 | H | 1.70780700  | 1.80004000  | 7.19984700  |
| H            | 5.04272600  | 8.61210500  | 15.48653800 | H | 0.67777000  | 3.57021400  | 8.72216200  |
| H            | 4.22827600  | 7.40065800  | 16.47737100 | C | 0.64182700  | 7.12381500  | 8.43351600  |
| C            | 2.90114900  | 8.76744500  | 15.43887600 | C | -0.22508000 | 8.05409700  | 9.28794800  |
| H            | 2.90278300  | 9.31174400  | 14.48061600 | H | -0.96354900 | 7.47946000  | 9.86486900  |
| H            | 2.02428500  | 8.09522600  | 15.41696600 | H | -0.76265500 | 8.75576300  | 8.62797800  |
| C            | 2.77854000  | 9.76146600  | 16.59007500 | H | 0.38043000  | 8.63266500  | 9.99985500  |
| H            | 3.63233800  | 10.45568900 | 16.58431900 | C | -0.21810500 | 6.28059500  | 7.50377300  |
| H            | 1.85750100  | 10.36186900 | 16.51035200 | H | 0.39098700  | 5.67164100  | 6.81984200  |
| H            | 2.75795800  | 9.24985700  | 17.56741200 | H | -0.85931100 | 6.94195400  | 6.89622800  |
| C            | 6.22456600  | 3.73618400  | 13.89093200 | H | -0.86521200 | 5.61401400  | 8.09338700  |
| H            | 6.84026600  | 3.30722000  | 14.69827900 | C | 1.72733800  | 7.89506600  | 7.70200400  |
| H            | 5.18887900  | 3.38785200  | 14.00619900 | H | 2.40360500  | 8.39505100  | 8.40766000  |
| C            | 6.76508600  | 3.35298600  | 12.51244100 | H | 1.26706600  | 8.67312700  | 7.06938600  |
| H            | 6.18829000  | 3.87810400  | 11.73553600 | H | 2.32502500  | 7.24619500  | 7.04796900  |
| H            | 7.80457900  | 3.70961700  | 12.39677600 | C | 1.64667300  | 12.81821300 | 11.56383900 |
| C            | 6.71730000  | 1.85139400  | 12.22340200 | C | 1.86353500  | 12.77155200 | 13.12790600 |
| H            | 5.66959300  | 1.51104400  | 12.29302500 | O | 2.75762700  | 11.65542900 | 13.28108400 |
| H            | 7.27000100  | 1.30623300  | 13.00969900 | O | 2.85114400  | 12.20203000 | 11.06825800 |
| C            | 7.28384300  | 1.49745200  | 10.84902700 | C | 2.58507800  | 14.00618900 | 13.67600000 |
| H            | 7.22565300  | 0.41648900  | 10.64506900 | H | 1.94244200  | 14.89966300 | 13.65550500 |
| H            | 6.72691600  | 2.01346800  | 10.05232200 | H | 2.87600300  | 13.81072300 | 14.71861500 |
| H            | 8.34198900  | 1.79783400  | 10.76257800 | H | 3.49914600  | 14.21641300 | 13.10152200 |
| Sn           | 6.15194900  | 5.89875000  | 14.12552100 | C | 0.59887800  | 12.49790100 | 13.93490200 |
| O            | 6.72233700  | 6.47202700  | 12.21452800 | H | 0.84497800  | 12.46907500 | 15.00656400 |
| C            | 8.04303100  | 6.87000300  | 11.93435400 | H | -0.15023800 | 13.28954300 | 13.77337600 |
| H            | 8.41818200  | 7.62897000  | 12.64590400 | H | 0.16020600  | 11.53023900 | 13.66381300 |
| H            | 8.74382900  | 6.01271900  | 11.94563200 | C | 0.47475700  | 11.94540800 | 11.10108500 |
| H            | 8.08667900  | 7.31371900  | 10.92559500 | H | -0.49596200 | 12.38719800 | 11.37295500 |
|              |             |             |             | H | 0.52111200  | 11.84960900 | 10.00596600 |
|              |             |             |             | H | 0.54005800  | 10.93477900 | 11.53043900 |
| <b>I-8b'</b> |             |             |             | C | 1.52976000  | 14.21866900 | 10.97386100 |
| Cu           | 4.06322100  | 7.18889300  | 10.96543100 | H | 1.39202400  | 14.14642500 | 9.88429500  |
| C            | 1.67919400  | 3.68960500  | 8.30358800  | H | 0.66155900  | 14.75042000 | 11.39449000 |
| C            | 2.24855500  | 2.70630500  | 7.47654800  | H | 2.43330400  | 14.81370800 | 11.16127200 |
| C            | 3.53645400  | 2.93929500  | 7.03163100  | H | -1.93259800 | 8.53445200  | 16.19056700 |
| C            | 4.24567900  | 4.08228400  | 7.41389300  | H | -0.03950200 | 9.50284800  | 14.88509400 |
| C            | 3.72662200  | 5.06300700  | 8.25230900  | H | -0.23067600 | 6.15176500  | 12.16722900 |
| C            | 2.37864000  | 4.84131500  | 8.65521200  | H | -2.11071100 | 5.22716000  | 13.42763300 |
| O            | 0.26991100  | 5.16328800  | 10.24639300 | O | -3.19218400 | 6.38274400  | 15.67684600 |
| P            | 4.75948900  | 6.40878500  | 8.98295100  |   |             |             |             |

|   |             |             |             |   |             |             |             |
|---|-------------|-------------|-------------|---|-------------|-------------|-------------|
| C | -3.80410000 | 5.17033300  | 15.33131800 | C | 6.42790500  | 5.64842200  | 9.12373000  |
| H | -4.26449600 | 5.20570900  | 14.32537900 | C | 6.58681000  | 4.60436800  | 10.05047900 |
| H | -4.59383000 | 4.98760700  | 16.07483000 | C | 7.56331100  | 6.18737200  | 8.50008300  |
| H | -3.09301700 | 4.32286200  | 15.35141500 | C | 7.85783700  | 4.09931500  | 10.32578700 |
| C | -1.55173000 | 8.03223200  | 15.29825500 | H | 5.71052900  | 4.22596200  | 10.58454300 |
| C | -0.49803400 | 8.56624600  | 14.56553300 | C | 8.83693900  | 5.69435500  | 8.79780800  |
| C | 0.00684300  | 7.91518300  | 13.41302600 | H | 7.45590600  | 7.00388500  | 7.78504800  |
| C | -0.60511400 | 6.69897300  | 13.03509600 | C | 8.98898000  | 4.64826100  | 9.71090800  |
| C | -1.67477800 | 6.16970000  | 13.76029600 | H | 7.96884600  | 3.28714900  | 11.04430500 |
| C | -2.15483400 | 6.83025600  | 14.89958200 | H | 9.71307600  | 6.13159400  | 8.31109000  |
| C | 1.08928500  | 8.45202900  | 12.66140700 | H | 9.98360200  | 4.25959700  | 9.94421700  |
| C | 2.07330400  | 8.75113700  | 11.98546700 | C | 7.39257000  | 7.69634200  | 14.96436100 |
| C | 3.21777400  | 9.05980600  | 11.20267500 | H | 7.40204700  | 8.73458500  | 14.59212300 |
| C | 4.20843200  | 10.11207000 | 11.79167800 | H | 7.18768800  | 7.76271200  | 16.04863000 |
| H | 5.01083100  | 10.29879000 | 11.05974000 | C | 8.74069500  | 7.01772000  | 14.72201600 |
| H | 4.68692200  | 9.72710900  | 12.70345700 | H | 8.71173200  | 5.97972300  | 15.10239600 |
| H | 2.90943400  | 9.37462600  | 10.19075200 | H | 8.92779000  | 6.92447900  | 13.63744800 |
| C | 5.62302500  | 2.75861900  | 6.20138200  | C | 9.93473800  | 7.73719300  | 15.35988400 |
| C | 6.10739300  | 2.94651200  | 4.77295500  | H | 9.76175100  | 7.82832000  | 16.44805900 |
| C | 7.52564600  | 3.52665700  | 4.74778200  | H | 9.97553400  | 8.77284500  | 14.97586600 |
| C | 8.49281600  | 2.66169800  | 5.56428700  | C | 11.27122600 | 7.04023700  | 15.10543400 |
| C | 7.99426700  | 2.48576000  | 7.00213000  | H | 11.47915100 | 6.96453700  | 14.02459000 |
| C | 6.57519000  | 1.91378900  | 7.04183800  | H | 12.11385000 | 7.57784000  | 15.57120700 |
| H | 7.87062500  | 3.62306600  | 3.70530100  | H | 11.26666600 | 6.01290100  | 15.50807500 |
| H | 6.08352200  | 1.95914200  | 4.28252500  | C | 3.86745400  | 7.57876200  | 14.82414200 |
| H | 5.38970400  | 3.59578900  | 4.24830400  | H | 3.35209200  | 6.84783600  | 15.46830400 |
| H | 8.59547600  | 1.67226600  | 5.07969700  | H | 3.22980700  | 7.71322300  | 13.94117100 |
| H | 9.49682800  | 3.11696500  | 5.56632400  | C | 4.10976700  | 8.90226300  | 15.54771200 |
| H | 8.67519300  | 1.83764800  | 7.57624400  | H | 4.70248200  | 9.57989600  | 14.90762200 |
| H | 7.99318800  | 3.46105200  | 7.50807300  | H | 4.71998600  | 8.74442100  | 16.45758600 |
| H | 6.54776700  | 0.88727100  | 6.63868900  | C | 2.81017400  | 9.61956900  | 15.92398700 |
| H | 6.19013200  | 1.87968900  | 8.07269600  | H | 2.24091700  | 9.79759400  | 14.99979400 |
| H | 7.49968100  | 4.54362900  | 5.17353800  | H | 2.19364100  | 8.95149500  | 16.55213500 |
| C | 5.01370300  | 7.61648900  | 7.61501400  | C | 3.04317200  | 10.94986000 | 16.63603100 |
| C | 5.12803700  | 8.96367300  | 7.98927600  | H | 3.59333100  | 11.64328200 | 15.98000100 |
| C | 5.09578600  | 7.27411200  | 6.25629700  | H | 2.09204900  | 11.43657600 | 16.91058300 |
| C | 5.32470100  | 9.95460100  | 7.02380300  | H | 3.62952400  | 10.82064500 | 17.56302800 |
| H | 5.03640600  | 9.22684100  | 9.04541300  | C | 6.06283300  | 4.56094200  | 14.71498700 |
| C | 5.28322400  | 8.26628900  | 5.29122700  | H | 6.63773800  | 4.63478700  | 15.65625400 |
| H | 5.02584000  | 6.22833800  | 5.95580000  | H | 5.07510300  | 4.13499700  | 14.94792800 |
| C | 5.39822000  | 9.60802800  | 5.67211300  | C | 6.78637100  | 3.68910800  | 13.69640400 |
| H | 5.40411000  | 11.00027700 | 7.33117600  | H | 6.18418700  | 3.66768700  | 12.77491400 |
| H | 5.34130300  | 7.99076700  | 4.23460700  | H | 7.75781800  | 4.14032700  | 13.42398500 |
| H | 5.54111100  | 10.38244300 | 4.91372700  | C | 7.01759300  | 2.25348900  | 14.17971900 |

|             |             |             |             |   |             |             |             |
|-------------|-------------|-------------|-------------|---|-------------|-------------|-------------|
| H           | 6.04194800  | 1.80915100  | 14.44651200 | C | 1.23715400  | 12.14338300 | 9.97637400  |
| H           | 7.60775800  | 2.27127600  | 15.11502500 | O | 2.35885800  | 11.90005300 | 10.85754400 |
| C           | 7.71719400  | 1.36676500  | 13.14941000 | O | 2.51498200  | 10.32180300 | 9.21800000  |
| H           | 7.86784200  | 0.34029000  | 13.52311600 | C | 1.06817900  | 13.64551500 | 9.79481200  |
| H           | 7.12730100  | 1.29911400  | 12.22013500 | H | 0.27925500  | 13.86299200 | 9.05802300  |
| H           | 8.70852000  | 1.77107200  | 12.88161100 | H | 0.77678100  | 14.10138300 | 10.75236700 |
| Sn          | 5.66472300  | 6.61821100  | 14.09606200 | H | 2.00083300  | 14.12113100 | 9.46536800  |
| O           | 5.98050100  | 7.12987700  | 12.11397500 | C | 0.00243400  | 11.54375700 | 10.65459500 |
| C           | 7.09925600  | 7.82999000  | 11.65407900 | H | -0.10021200 | 11.99283600 | 11.65279700 |
| H           | 7.40341000  | 8.66179200  | 12.31904100 | H | -0.91551000 | 11.74633000 | 10.08346000 |
| H           | 7.97700600  | 7.16928500  | 11.50831500 | H | 0.10689900  | 10.45885800 | 10.79269300 |
| H           | 6.86630300  | 8.27599700  | 10.67023700 | C | 0.51910200  | 10.73343800 | 7.90045600  |
| Br          | 3.57290000  | 5.02660800  | 12.28322600 | H | -0.17570400 | 11.50893500 | 7.54302400  |
|             |             |             |             | H | 0.91207200  | 10.19647700 | 7.02429600  |
| <b>I-9a</b> |             |             |             | H | -0.03946500 | 10.01965300 | 8.51577200  |
| Cu          | 4.42176700  | 7.05663000  | 10.40717100 | C | 2.54145000  | 12.19624700 | 7.73392700  |
| C           | 2.69640700  | 3.16157000  | 9.32971400  | H | 2.97251200  | 11.52838100 | 6.97318200  |
| C           | 3.24742300  | 2.04462300  | 8.67652300  | H | 1.96104700  | 12.97687400 | 7.22100600  |
| C           | 4.36254100  | 2.26413800  | 7.88753700  | H | 3.36860600  | 12.67534000 | 8.27751400  |
| C           | 4.91694000  | 3.54372200  | 7.74038300  | H | -3.30224300 | 9.07849000  | 13.71887300 |
| C           | 4.40173800  | 4.66721800  | 8.37013500  | H | -1.01294500 | 10.01772200 | 13.34851700 |
| C           | 3.24907800  | 4.42902700  | 9.17196500  | H | 0.56818100  | 6.01751200  | 13.10526300 |
| O           | 1.70039000  | 5.05250300  | 11.25166700 | H | -1.67710900 | 5.08888800  | 13.49343800 |
| P           | 5.24835000  | 6.29828300  | 8.41950700  | O | -3.92241700 | 6.62305000  | 13.83495400 |
| B           | 2.97676500  | 10.75321300 | 10.44601300 | C | -4.18905300 | 5.24297100  | 13.90939200 |
| S           | 2.49439500  | 5.75481700  | 10.16960000 | H | -3.92842600 | 4.72175300  | 12.97011800 |
| O           | 5.99290400  | 3.47086000  | 6.91733800  | H | -5.26813600 | 5.13977400  | 14.08606300 |
| O           | 5.09060100  | 1.37088700  | 7.17145800  | H | -3.64185100 | 4.76258400  | 14.74057000 |
| H           | 2.83361800  | 1.04405100  | 8.80483600  | C | -2.43883600 | 8.42361500  | 13.58709700 |
| H           | 1.85051600  | 3.05006300  | 10.00939000 | C | -1.16581100 | 8.93753300  | 13.38188800 |
| C           | 1.18093000  | 6.45888100  | 8.97804500  | C | -0.05181500 | 8.08370800  | 13.21475100 |
| C           | 0.41126700  | 7.45188100  | 9.84494600  | C | -0.27173100 | 6.69426200  | 13.26479600 |
| H           | -0.05470500 | 6.95454300  | 10.70296700 | C | -1.54971400 | 6.17082200  | 13.46816400 |
| H           | -0.38609200 | 7.90478700  | 9.23533400  | C | -2.64380800 | 7.03381800  | 13.63248100 |
| H           | 1.06138300  | 8.25540000  | 10.21462200 | C | 1.25398700  | 8.61422400  | 12.98657000 |
| C           | 0.28706600  | 5.30614400  | 8.53967600  | C | 2.36561800  | 9.08445700  | 12.80426500 |
| H           | 0.80299100  | 4.61640100  | 7.85703900  | C | 3.71768400  | 9.57633700  | 12.66543500 |
| H           | -0.58634600 | 5.72086800  | 8.01121000  | C | 4.09126300  | 9.98311100  | 11.22594500 |
| H           | -0.07787500 | 4.74655400  | 9.41304700  | H | 4.35143300  | 9.10000200  | 10.61524000 |
| C           | 1.88075800  | 7.14430500  | 7.81639300  | H | 5.01666000  | 10.58192500 | 11.24763300 |
| H           | 2.51396100  | 7.97359800  | 8.15795100  | H | 3.83456200  | 10.45328800 | 13.32190200 |
| H           | 1.11433500  | 7.57468200  | 7.15172300  | C | 6.28807500  | 2.05718200  | 6.74034300  |
| H           | 2.47699100  | 6.44389300  | 7.21609000  | C | 6.55356900  | 1.79064200  | 5.27230800  |
| C           | 1.66684200  | 11.36451200 | 8.67549900  | C | 7.84535600  | 2.48069300  | 4.81711400  |

|   |             |             |             |              |             |             |             |
|---|-------------|-------------|-------------|--------------|-------------|-------------|-------------|
| C | 9.03287100  | 2.08259200  | 5.70126200  | C            | 10.16251000 | 5.92377900  | 13.92339600 |
| C | 8.74538600  | 2.37039600  | 7.17845400  | H            | 9.99409000  | 5.58442200  | 12.88731000 |
| C | 7.45792000  | 1.68265400  | 7.64166200  | H            | 11.24608100 | 6.07902100  | 14.05215300 |
| H | 8.04295900  | 2.23364100  | 3.76213800  | H            | 9.86129900  | 5.09946400  | 14.59189500 |
| H | 6.63342900  | 0.69863200  | 5.14649800  | C            | 3.94839000  | 8.40732900  | 15.74619500 |
| H | 5.68051800  | 2.12809500  | 4.69307500  | H            | 4.49070000  | 7.78569800  | 16.48339200 |
| H | 9.24269700  | 1.00549800  | 5.56695800  | H            | 2.91647700  | 8.01854800  | 15.70572700 |
| H | 9.93907200  | 2.62074500  | 5.38013500  | C            | 3.94584000  | 9.86759200  | 16.19197800 |
| H | 9.58645300  | 2.04756000  | 7.81126600  | H            | 3.35947400  | 10.47410700 | 15.47723400 |
| H | 8.64025600  | 3.45495700  | 7.32851200  | H            | 4.97319300  | 10.28089400 | 16.15917300 |
| H | 7.56023100  | 0.58547400  | 7.60679200  | C            | 3.37398400  | 10.10226200 | 17.59558100 |
| H | 7.20619800  | 1.96000400  | 8.67747300  | H            | 2.34785500  | 9.69387500  | 17.63373900 |
| H | 7.70299200  | 3.57343500  | 4.86783700  | H            | 3.95857900  | 9.51215200  | 18.32488200 |
| C | 5.09682000  | 7.07038100  | 6.77207800  | C            | 3.36083800  | 11.57242200 | 18.01321000 |
| C | 4.91329600  | 8.46225000  | 6.74405600  | H            | 2.75427200  | 12.17758800 | 17.31810300 |
| C | 5.15306800  | 6.35291700  | 5.56629900  | H            | 2.94504000  | 11.71023800 | 19.02477600 |
| C | 4.79295000  | 9.13049800  | 5.52341300  | H            | 4.37951400  | 11.99651600 | 18.01100900 |
| H | 4.84411300  | 9.02023000  | 7.68125600  | C            | 4.16897300  | 5.93004100  | 13.56514700 |
| C | 5.02209000  | 7.02503900  | 4.34914700  | H            | 4.08615100  | 5.58896000  | 14.61176000 |
| H | 5.31028300  | 5.27381700  | 5.58140900  | H            | 3.13510300  | 6.00865300  | 13.19292200 |
| C | 4.84307300  | 8.41239300  | 4.32553300  | C            | 4.95073000  | 4.91051900  | 12.74237700 |
| H | 4.65106000  | 10.21366400 | 5.51070200  | H            | 4.98626000  | 5.23922400  | 11.68958300 |
| H | 5.06285500  | 6.46306900  | 3.41291200  | H            | 6.00820900  | 4.88682100  | 13.05610500 |
| H | 4.74115500  | 8.93371900  | 3.37071600  | C            | 4.37844300  | 3.49129200  | 12.77009800 |
| C | 7.01541400  | 5.85738600  | 8.59282500  | H            | 3.32849900  | 3.53015300  | 12.43711900 |
| C | 7.39932700  | 5.16283800  | 9.75199300  | H            | 4.36183800  | 3.12110700  | 13.81117000 |
| C | 7.99666600  | 6.30449800  | 7.69825400  | C            | 5.17158200  | 2.52512900  | 11.88907000 |
| C | 8.74736400  | 4.91073700  | 10.00324200 | H            | 4.74673200  | 1.50830600  | 11.90019000 |
| H | 6.64911300  | 4.84580000  | 10.47580400 | H            | 5.17925000  | 2.86405900  | 10.84003000 |
| C | 9.34774700  | 6.05978400  | 7.96168300  | H            | 6.22239900  | 2.45254500  | 12.21845200 |
| H | 7.70894900  | 6.85069600  | 6.79852600  | Sn           | 4.91033600  | 7.98838600  | 13.78083600 |
| C | 9.72651400  | 5.36460400  | 9.11293600  | O            | 5.89485400  | 7.54559400  | 11.55069800 |
| H | 9.03402400  | 4.37520000  | 10.91089400 | C            | 6.91405000  | 8.31511200  | 11.00564800 |
| H | 10.10728800 | 6.41674200  | 7.26201100  | H            | 6.94339700  | 9.34557800  | 11.41764200 |
| H | 10.78299800 | 5.17885400  | 9.31943400  | H            | 7.91245000  | 7.86890200  | 11.19434000 |
| C | 7.03130400  | 8.27435300  | 14.27145600 | H            | 6.83050000  | 8.43073000  | 9.90198100  |
| H | 7.42540700  | 9.09878200  | 13.65679700 |              |             |             |             |
| H | 7.08443900  | 8.60311700  | 15.32282200 | <b>I-9a'</b> |             |             |             |
| C | 7.85163000  | 7.00346800  | 14.04475200 | Cu           | 4.18325100  | 5.90380600  | 11.19584100 |
| H | 7.51199200  | 6.20961600  | 14.73630900 | C            | 1.52540000  | 2.78828500  | 7.62182000  |
| H | 7.65050300  | 6.62041300  | 13.03113000 | C            | 2.19580600  | 1.97360100  | 6.69616100  |
| C | 9.36229300  | 7.19300800  | 14.21440900 | C            | 3.49025900  | 2.33661300  | 6.37560900  |
| H | 9.57787500  | 7.54642300  | 15.23917500 | C            | 4.11129400  | 3.43785000  | 6.97375900  |
| H | 9.69624800  | 8.00253800  | 13.54004600 | C            | 3.48747500  | 4.25669900  | 7.91219800  |

|   |             |             |             |   |             |             |             |
|---|-------------|-------------|-------------|---|-------------|-------------|-------------|
| C | 2.13551100  | 3.90747400  | 8.18451700  | H | 1.51493000  | 5.75094100  | 12.57580100 |
| O | -0.09684200 | 3.89229400  | 9.60934100  | H | -0.36430300 | 4.27705500  | 12.14620900 |
| P | 4.40860200  | 5.54030700  | 8.88345400  | O | -2.94891200 | 5.13693700  | 11.82845900 |
| B | 3.23854100  | 10.91388900 | 10.84036700 | C | -2.76502100 | 3.75801400  | 11.55868600 |
| S | 1.06841500  | 4.84198600  | 9.34241900  | H | -2.00978000 | 3.60017900  | 10.77163800 |
| O | 5.37438200  | 3.55496900  | 6.46620600  | H | -3.74222600 | 3.37525100  | 11.23132800 |
| O | 4.34444600  | 1.74155200  | 5.49456300  | H | -2.45454300 | 3.20902700  | 12.46680600 |
| H | 1.72533800  | 1.09638000  | 6.24974700  | C | -2.04231600 | 7.25829600  | 12.28523500 |
| H | 0.50862700  | 2.56162400  | 7.94717900  | C | -0.95733000 | 8.09841600  | 12.51447900 |
| C | 0.29957000  | 6.11217200  | 8.12769800  | C | 0.35215500  | 7.57871000  | 12.61263700 |
| C | -0.75454900 | 6.80386400  | 8.99408600  | C | 0.51644700  | 6.18438500  | 12.51365400 |
| H | -1.51011200 | 6.08863700  | 9.34374800  | C | -0.56277800 | 5.33738800  | 12.28451100 |
| H | -1.25883700 | 7.58460800  | 8.40111500  | C | -1.84961900 | 5.87393100  | 12.13968300 |
| H | -0.30457100 | 7.28257600  | 9.87489500  | C | 1.50328500  | 8.40828200  | 12.76588500 |
| C | -0.35102900 | 5.38307000  | 6.96152500  | C | 2.55235500  | 9.02250500  | 12.87087200 |
| H | 0.39347700  | 4.96227100  | 6.27057600  | C | 3.80649900  | 9.72693500  | 12.98698800 |
| H | -0.98474900 | 6.08797600  | 6.39655500  | C | 4.39127400  | 10.22083900 | 11.63274900 |
| H | -0.99019700 | 4.56904900  | 7.33511900  | H | 4.78888700  | 9.34806200  | 11.10121200 |
| C | 1.38284800  | 7.08334800  | 7.68812900  | H | 5.22706600  | 10.90959000 | 11.83799100 |
| H | 1.87162700  | 7.57015800  | 8.54445200  | H | 3.66654100  | 10.58846100 | 13.66016100 |
| H | 0.93278300  | 7.87884600  | 7.07021300  | C | 5.62057200  | 2.39501100  | 5.64053100  |
| H | 2.15015000  | 6.59445800  | 7.07410800  | C | 6.12664600  | 2.86123500  | 4.28451300  |
| C | 1.48250000  | 11.19461100 | 9.39221500  | C | 7.51020800  | 3.50844300  | 4.40753000  |
| C | 1.43866600  | 12.28242400 | 10.53888600 | C | 8.50549600  | 2.56071700  | 5.08666500  |
| O | 2.74947100  | 12.16872300 | 11.12913300 | C | 7.98710100  | 2.10631500  | 6.45478700  |
| O | 2.50877300  | 10.29414200 | 9.85453400  | C | 6.60028300  | 1.46756500  | 6.35066800  |
| C | 1.23787000  | 13.71384000 | 10.05509000 | H | 7.87164200  | 3.80742800  | 3.41011900  |
| H | 0.27361600  | 13.81895800 | 9.53333700  | H | 6.16985500  | 1.97764900  | 3.62621100  |
| H | 1.23639500  | 14.39556500 | 10.91882100 | H | 5.38507100  | 3.55547000  | 3.86001500  |
| H | 2.04182600  | 14.02958200 | 9.37755400  | H | 8.67155400  | 1.68014600  | 4.43763200  |
| C | 0.42900500  | 11.95019900 | 11.64198700 | H | 9.48322100  | 3.05718600  | 5.19956400  |
| H | 0.59009900  | 12.63964600 | 12.48392500 | H | 8.68937000  | 1.39948400  | 6.92446100  |
| H | -0.60908600 | 12.05910600 | 11.29413200 | H | 7.92368900  | 2.97368200  | 7.12616400  |
| H | 0.57980100  | 10.92710500 | 12.01374500 | H | 6.63730300  | 0.52817800  | 5.77337400  |
| C | 0.18662500  | 10.41161700 | 9.21813900  | H | 6.19546400  | 1.23338800  | 7.34719400  |
| H | -0.65013600 | 11.08609600 | 8.97716900  | H | 7.41972600  | 4.43058700  | 5.00573700  |
| H | 0.29762100  | 9.69470100  | 8.39402200  | C | 4.69511400  | 6.92397300  | 7.70478500  |
| H | -0.06147200 | 9.84219000  | 10.12188500 | C | 4.59205100  | 8.21272800  | 8.24803500  |
| C | 1.94715900  | 11.74863800 | 8.04274300  | C | 4.97904400  | 6.77421600  | 6.33704900  |
| H | 2.14262600  | 10.90577500 | 7.36417600  | C | 4.77748100  | 9.33830800  | 7.44180800  |
| H | 1.18644800  | 12.39859400 | 7.58467400  | H | 4.34274600  | 8.33110200  | 9.30359800  |
| H | 2.88012300  | 12.32184300 | 8.14814700  | C | 5.15681000  | 7.90097800  | 5.53135400  |
| H | -3.05455300 | 7.65448500  | 12.17979200 | H | 5.07233800  | 5.77611800  | 5.90880800  |
| H | -1.11279300 | 9.17580700  | 12.60409800 | C | 5.05858500  | 9.18455200  | 6.08232200  |

|   |             |             |             |             |            |             |             |
|---|-------------|-------------|-------------|-------------|------------|-------------|-------------|
| H | 4.68345600  | 10.33148300 | 7.88328000  | H           | 5.98081900 | 5.30810700  | 13.20757900 |
| H | 5.37569400  | 7.77749400  | 4.46711200  | H           | 6.75268500 | 5.59621500  | 14.76586000 |
| H | 5.19685300  | 10.06418600 | 5.44783100  | C           | 5.47299900 | 3.86111800  | 14.72718100 |
| C | 6.07616000  | 4.75985400  | 9.03063600  | H           | 4.46905900 | 3.60269400  | 14.35538800 |
| C | 6.18656000  | 3.58594800  | 9.79594300  | H           | 5.43203100 | 3.80965100  | 15.83197100 |
| C | 7.24291200  | 5.38260400  | 8.56580800  | C           | 6.47733500 | 2.84394600  | 14.18796100 |
| C | 7.44404800  | 3.05653200  | 10.09422200 | H           | 6.24985800 | 1.81891900  | 14.52626400 |
| H | 5.28637500  | 3.11421200  | 10.19829800 | H           | 6.45768500 | 2.84539600  | 13.08592200 |
| C | 8.49876200  | 4.85555400  | 8.87650200  | H           | 7.50872200 | 3.08218700  | 14.50407000 |
| H | 7.17348200  | 6.29517800  | 7.97316700  | Sn          | 5.16587300 | 8.37808600  | 14.14736300 |
| C | 8.60519600  | 3.69421200  | 9.64673900  | O           | 5.39147300 | 7.31739300  | 11.84316400 |
| H | 7.51329100  | 2.15233100  | 10.70393500 | C           | 6.59447600 | 7.38609600  | 11.15628900 |
| H | 9.39933100  | 5.36134500  | 8.51838300  | H           | 7.21555500 | 8.24178600  | 11.48775400 |
| H | 9.58837300  | 3.28805600  | 9.89764100  | H           | 7.22414600 | 6.47575400  | 11.27244500 |
| C | 7.25586700  | 9.04247000  | 13.97523700 | H           | 6.46439400 | 7.53062100  | 10.06249200 |
| H | 7.37430400  | 9.54258400  | 13.00090900 | Br          | 3.19291100 | 3.78084300  | 11.82552600 |
| H | 7.37819200  | 9.82423000  | 14.74379600 |             |            |             |             |
| C | 8.31720300  | 7.95763300  | 14.15065300 | <b>I-9b</b> |            |             |             |
| H | 8.22925600  | 7.50612700  | 15.15616300 | Cu          | 5.19561600 | 7.15644700  | 9.95787900  |
| H | 8.13705000  | 7.13274600  | 13.44246300 | C           | 2.92820800 | 3.46168300  | 8.72403000  |
| C | 9.75287700  | 8.45868100  | 13.95907200 | C           | 3.31234200 | 2.29596800  | 8.03806900  |
| H | 9.95072300  | 9.28223700  | 14.67011200 | C           | 4.50560400 | 2.34246200  | 7.34025500  |
| H | 9.84128900  | 8.90436000  | 12.95126800 | C           | 5.30647500 | 3.49433800  | 7.31968400  |
| C | 10.80431800 | 7.36223800  | 14.12905500 | C           | 4.94607400 | 4.66936400  | 7.96433500  |
| H | 10.64050300 | 6.54392500  | 13.40782800 | C           | 3.70836400 | 4.61272500  | 8.66802600  |
| H | 11.82831000 | 7.74311200  | 13.97804500 | O           | 2.27948300 | 5.39855100  | 10.78397200 |
| H | 10.75765500 | 6.91943000  | 15.13860300 | P           | 5.98665300 | 6.18105300  | 8.07813100  |
| C | 4.67106800  | 9.25852700  | 16.15717500 | B           | 4.08646600 | 10.83722100 | 13.36525400 |
| H | 5.24092300  | 8.67985800  | 16.90873000 | S           | 3.16387600 | 5.99865300  | 9.71330900  |
| H | 3.60379000  | 9.04019000  | 16.34636400 | O           | 6.42108800 | 3.24863100  | 6.58753300  |
| C | 4.94209500  | 10.75056200 | 16.32887400 | O           | 5.09634300 | 1.36615500  | 6.60875700  |
| H | 4.38427900  | 11.32791800 | 15.56682400 | H           | 2.71202000 | 1.38625700  | 8.07001000  |
| H | 6.00934300  | 10.96781300 | 16.13058700 | H           | 2.03305400 | 3.47337600  | 9.34773900  |
| C | 4.58587300  | 11.31658300 | 17.70994100 | C           | 1.99027000 | 6.98590200  | 8.58975200  |
| H | 3.51801400  | 11.11666500 | 17.91350300 | C           | 1.58320500 | 8.17220500  | 9.46823700  |
| H | 5.14633500  | 10.75772200 | 18.48195700 | H           | 1.12117100 | 7.84096900  | 10.40895400 |
| C | 4.86612100  | 12.81298400 | 17.85145300 | H           | 0.85452300 | 8.79063200  | 8.92065300  |
| H | 4.29284300  | 13.39585900 | 17.11033200 | H           | 2.44942000 | 8.80410000  | 9.71463400  |
| H | 4.60029200  | 13.19264900 | 18.85240600 | C           | 0.79963600 | 6.09334400  | 8.26832400  |
| H | 5.93396400  | 13.03526900 | 17.68301800 | H           | 1.07707800 | 5.26921600  | 7.59495000  |
| C | 4.69423700  | 6.29850100  | 14.60866300 | H           | 0.02337200 | 6.69533800  | 7.76932500  |
| H | 4.43191300  | 6.28424300  | 15.68057800 | H           | 0.37411100 | 5.67545000  | 9.19185900  |
| H | 3.78460100  | 6.03725600  | 14.04559100 | C           | 2.74567200 | 7.43778000  | 7.34864300  |
| C | 5.80033500  | 5.29338300  | 14.29402300 | H           | 3.63181100 | 8.03640500  | 7.60573000  |

|   |             |             |             |   |             |            |             |
|---|-------------|-------------|-------------|---|-------------|------------|-------------|
| H | 2.08324600  | 8.07114400  | 6.73663600  | C | 6.43028600  | 1.82242300 | 6.29127800  |
| H | 3.06536400  | 6.59111700  | 6.72590800  | C | 6.71931100  | 1.63373300 | 4.81491800  |
| C | 3.66388300  | 12.43883400 | 14.94054600 | C | 8.15680600  | 2.05155800 | 4.48349600  |
| C | 5.21138300  | 12.13401500 | 14.87976500 | C | 9.17043500  | 1.30769300 | 5.36091400  |
| O | 5.32192800  | 11.35162400 | 13.66813600 | C | 8.87400500  | 1.50989200 | 6.85090900  |
| O | 3.10304600  | 11.34304900 | 14.18054300 | C | 7.43465200  | 1.11922700 | 7.19574300  |
| C | 6.10330000  | 13.36245900 | 14.75011000 | H | 8.35719000  | 1.86976100 | 3.41595900  |
| H | 5.98108200  | 14.02733100 | 15.61922500 | H | 6.56295400  | 0.56775900 | 4.58263200  |
| H | 7.15634900  | 13.04752600 | 14.70508400 | H | 5.98097400  | 2.21174000 | 4.23848100  |
| H | 5.88166300  | 13.93007200 | 13.83740400 | H | 9.13687700  | 0.22932700 | 5.12007800  |
| C | 5.69411200  | 11.25268400 | 16.03237700 | H | 10.19257200 | 1.64761600 | 5.12846800  |
| H | 6.71577100  | 10.91001700 | 15.81718800 | H | 9.57279700  | 0.92501900 | 7.46932500  |
| H | 5.70173600  | 11.80240400 | 16.98491700 | H | 9.02733200  | 2.56591500 | 7.11767000  |
| H | 5.05849200  | 10.36528500 | 16.14659600 | H | 7.27976800  | 0.03583300 | 7.06176700  |
| C | 3.06789500  | 12.43073200 | 16.34163000 | H | 7.19097500  | 1.35995100 | 8.24192800  |
| H | 3.53835800  | 13.20454800 | 16.96786900 | H | 8.25670100  | 3.13811500 | 4.64514600  |
| H | 1.99001200  | 12.64489900 | 16.28942500 | C | 6.02750100  | 6.87669900 | 6.38877100  |
| H | 3.19228900  | 11.45811500 | 16.82986800 | C | 6.58900900  | 8.15749700 | 6.24987500  |
| C | 3.27340600  | 13.72580600 | 14.20908100 | C | 5.52143500  | 6.22196900 | 5.25747300  |
| H | 2.17815200  | 13.76120900 | 14.11594000 | C | 6.65468400  | 8.76600000 | 4.99626700  |
| H | 3.60564800  | 14.62145500 | 14.75432200 | H | 6.97564000  | 8.67755600 | 7.13103700  |
| H | 3.70059500  | 13.75403100 | 13.19603600 | C | 5.57975700  | 6.83882600 | 4.00454000  |
| H | -1.39766200 | 11.41453100 | 16.69308700 | H | 5.08378900  | 5.22779600 | 5.35076400  |
| H | 0.45700100  | 10.93620200 | 15.06557700 | C | 6.14715800  | 8.10840400 | 3.87053000  |
| H | -1.05845100 | 6.94442000  | 14.54261800 | H | 7.09558400  | 9.76074600 | 4.89868800  |
| H | -2.88059600 | 7.40407000  | 16.14047700 | H | 5.18138800  | 6.32156900 | 3.12838200  |
| O | -3.21235100 | 9.80179500  | 17.42257200 | H | 6.19145300  | 8.58802900 | 2.88998900  |
| C | -4.17325300 | 8.84588200  | 17.79762300 | C | 7.71102400  | 5.63187000 | 8.36619300  |
| H | -4.78038800 | 8.51077200  | 16.93658000 | C | 8.16458100  | 5.61138000 | 9.69578500  |
| H | -4.83286600 | 9.33137900  | 18.52956100 | C | 8.59544200  | 5.31764200 | 7.32361500  |
| H | -3.71024000 | 7.95825300  | 18.26648200 | C | 9.47944800  | 5.23522800 | 9.97859100  |
| C | -1.30949200 | 10.44187100 | 16.20506300 | H | 7.49792100  | 5.92729300 | 10.50212600 |
| C | -0.28987700 | 10.17692400 | 15.30322000 | C | 9.91493900  | 4.96604000 | 7.61172000  |
| C | -0.17561200 | 8.90868400  | 14.68503400 | H | 8.25156000  | 5.34942800 | 6.28907200  |
| C | -1.13280600 | 7.93058900  | 15.00504000 | C | 10.35558700 | 4.91260000 | 8.93889500  |
| C | -2.16220600 | 8.19142500  | 15.91328000 | H | 9.82186200  | 5.21872400 | 11.01557200 |
| C | -2.25483100 | 9.45093600  | 16.52298200 | H | 10.60324800 | 4.73018800 | 6.79643800  |
| C | 0.92631700  | 8.65346800  | 13.82002000 | H | 11.38854700 | 4.63356400 | 9.16045900  |
| C | 1.96645200  | 8.52269900  | 13.19832700 | C | 6.50278900  | 8.01991900 | 14.53130400 |
| C | 3.27521700  | 8.44474300  | 12.60495300 | H | 6.60268200  | 8.98895900 | 14.02174900 |
| C | 3.85311500  | 9.81800500  | 12.19642000 | H | 6.48750900  | 8.21522500 | 15.61656300 |
| H | 3.16118700  | 10.29350000 | 11.47258700 | C | 7.64831900  | 7.08367000 | 14.15109900 |
| H | 4.80498200  | 9.63297900  | 11.68376600 | H | 7.53119500  | 6.10573900 | 14.65490200 |
| H | 3.25821900  | 7.77874100  | 11.73179200 | H | 7.58639900  | 6.88067200 | 13.07039100 |



|              |             |             |             |   |             |             |             |
|--------------|-------------|-------------|-------------|---|-------------|-------------|-------------|
| C            | 9.03568700  | 7.64314300  | 14.48262400 | C | 3.67754500  | 3.23378000  | 6.30005300  |
| H            | 9.12666300  | 7.78090600  | 15.57561400 | C | 4.24058900  | 4.26488700  | 7.05982300  |
| H            | 9.12680300  | 8.65240400  | 14.04281400 | C | 3.61926600  | 4.82445600  | 8.17307600  |
| C            | 10.17438700 | 6.76054600  | 13.97297000 | C | 2.32369000  | 4.30041100  | 8.44253800  |
| H            | 10.13660400 | 6.67257400  | 12.87390900 | O | 0.19547300  | 3.87423100  | 9.97914900  |
| H            | 11.16386100 | 7.16569100  | 14.24003400 | P | 4.49892000  | 5.95045200  | 9.35479500  |
| H            | 10.10730700 | 5.74064800  | 14.38859600 | B | 3.09264500  | 11.56590700 | 12.87268000 |
| C            | 3.31260400  | 7.04138000  | 15.79540200 | S | 1.26211200  | 4.94731000  | 9.78122500  |
| H            | 3.77465400  | 6.27407300  | 16.44183100 | O | 5.44408200  | 4.60568500  | 6.51135400  |
| H            | 2.35688400  | 6.62044800  | 15.44149700 | O | 4.51281600  | 2.90397500  | 5.27357800  |
| C            | 3.05266400  | 8.32508500  | 16.58444000 | H | 2.03162100  | 1.85728000  | 6.04486600  |
| H            | 2.74284800  | 9.13316400  | 15.90118500 | H | 0.80735600  | 2.86460100  | 8.04608900  |
| H            | 3.99195400  | 8.66767600  | 17.05814500 | C | 0.31850100  | 6.30320500  | 8.79586400  |
| C            | 1.98079500  | 8.16584900  | 17.66925100 | C | -0.68730800 | 6.83622800  | 9.81732300  |
| H            | 1.04377500  | 7.83424400  | 17.18950200 | H | -1.36039000 | 6.04242500  | 10.16638600 |
| H            | 2.27961700  | 7.35139500  | 18.35473200 | H | -1.29527700 | 7.62701200  | 9.34668200  |
| C            | 1.71431000  | 9.44241700  | 18.46481300 | H | -0.18492600 | 7.26956500  | 10.69275000 |
| H            | 1.34363900  | 10.24304700 | 17.80639200 | C | -0.39603900 | 5.66720400  | 7.61307200  |
| H            | 0.95414000  | 9.28406800  | 19.24683100 | H | 0.30268400  | 5.37383000  | 6.81673700  |
| H            | 2.63099300  | 9.80892900  | 18.95855000 | H | -1.11621900 | 6.38805900  | 7.18986800  |
| C            | 4.50698300  | 5.15024000  | 13.28124600 | H | -0.95176000 | 4.77734800  | 7.94492700  |
| H            | 4.59788400  | 4.54054500  | 14.19726300 | C | 1.30140300  | 7.38698300  | 8.38798000  |
| H            | 3.47850100  | 5.01817700  | 12.90903800 | H | 1.86548700  | 7.76012100  | 9.25358800  |
| C            | 5.49600200  | 4.66236000  | 12.22867900 | H | 0.75151200  | 8.24254700  | 7.96081900  |
| H            | 5.43860000  | 5.30871900  | 11.33519600 | H | 2.01635700  | 7.03917600  | 7.63088400  |
| H            | 6.53341000  | 4.77409300  | 12.58710600 | C | 1.84567300  | 11.92142500 | 10.98534300 |
| C            | 5.25391100  | 3.21229300  | 11.79933500 | C | 1.11741900  | 12.53818900 | 12.24521800 |
| H            | 4.24255800  | 3.14167300  | 11.36390700 | O | 1.88219200  | 12.00566800 | 13.34396000 |
| H            | 5.24371100  | 2.56840300  | 12.69726900 | O | 3.17336600  | 11.66078500 | 11.49853400 |
| C            | 6.28798800  | 2.68716900  | 10.80407400 | C | 1.22911700  | 14.06369100 | 12.32394900 |
| H            | 6.06883500  | 1.65081800  | 10.49863100 | H | 0.61399600  | 14.55998800 | 11.55840600 |
| H            | 6.31472000  | 3.30575500  | 9.89507600  | H | 0.88467600  | 14.39168800 | 13.31584800 |
| H            | 7.30368000  | 2.70467800  | 11.23274100 | H | 2.27193300  | 14.39119400 | 12.20284500 |
| Sn           | 4.54570800  | 7.22188100  | 13.98738400 | C | -0.33576100 | 12.10874400 | 12.41080900 |
| O            | 6.19618800  | 7.87450900  | 11.36757100 | H | -0.75091900 | 12.55966800 | 13.32466400 |
| C            | 7.22043400  | 8.77382700  | 11.11198000 | H | -0.94397300 | 12.44044000 | 11.55463700 |
| H            | 6.87643200  | 9.83311700  | 11.11144400 | H | -0.42042100 | 11.01898000 | 12.50094500 |
| H            | 8.01504500  | 8.71451700  | 11.88564700 | C | 1.25259400  | 10.58170400 | 10.54112600 |
| H            | 7.73233300  | 8.60812100  | 10.13437800 | H | 0.24914400  | 10.70836400 | 10.10836100 |
|              |             |             |             | H | 1.90304900  | 10.14049300 | 9.77491200  |
|              |             |             |             | H | 1.19829500  | 9.87078600  | 11.37610300 |
| <b>I-9b'</b> |             |             |             | C | 1.95632500  | 12.86222100 | 9.79008600  |
| Cu           | 4.56372100  | 5.71828300  | 11.71596600 | H | 2.46090400  | 12.34568200 | 8.96031300  |
| C            | 1.77597700  | 3.24527200  | 7.71709200  | H | 0.95688000  | 13.16629600 | 9.44148100  |
| C            | 2.45038400  | 2.68375400  | 6.62080000  |   |             |             |             |

|   |             |             |             |   |             |             |             |
|---|-------------|-------------|-------------|---|-------------|-------------|-------------|
| H | 2.53457100  | 13.76305000 | 10.03375700 | C | 4.84014200  | 9.08511900  | 6.63221300  |
| H | -2.51691700 | 7.37849700  | 13.36835100 | H | 4.90852300  | 6.92880700  | 6.49156300  |
| H | -0.54441100 | 8.90585800  | 13.59165200 | C | 4.71020000  | 10.19111200 | 7.48146400  |
| H | 2.06670700  | 5.55444800  | 12.82249500 | H | 4.39804900  | 10.84665200 | 9.53258000  |
| H | 0.16373100  | 4.07868500  | 12.60190200 | H | 4.99435200  | 9.23379600  | 5.55986400  |
| O | -2.44667400 | 4.90057200  | 12.76807100 | H | 4.76260500  | 11.20354900 | 7.07166600  |
| C | -2.28636300 | 3.56641300  | 12.31926500 | C | 6.23724300  | 5.33184800  | 9.23221200  |
| H | -1.65627500 | 3.51680000  | 11.41526200 | C | 6.50739300  | 4.04666300  | 9.73621400  |
| H | -3.29581200 | 3.19080300  | 12.09926300 | C | 7.30821000  | 6.14848300  | 8.84331100  |
| H | -1.83263000 | 2.92984600  | 13.10091500 | C | 7.82505600  | 3.60182200  | 9.86010200  |
| C | -1.49811600 | 6.99905900  | 13.26452000 | H | 5.68425300  | 3.41334400  | 10.07697800 |
| C | -0.39835000 | 7.84481200  | 13.37733200 | C | 8.62556900  | 5.70354900  | 8.98143600  |
| C | 0.91308900  | 7.35173600  | 13.19899300 | H | 7.11626700  | 7.14663800  | 8.44900800  |
| C | 1.07023900  | 5.97279100  | 12.96178300 | C | 8.89038600  | 4.43232100  | 9.49739800  |
| C | -0.02264100 | 5.12103600  | 12.85130300 | H | 8.01808800  | 2.60737800  | 10.27015000 |
| C | -1.32034400 | 5.63726300  | 12.96603100 | H | 9.44953200  | 6.36022600  | 8.69025000  |
| C | 2.06970400  | 8.18372300  | 13.22512300 | H | 9.92131900  | 4.09055600  | 9.61786700  |
| C | 3.13914400  | 8.77269500  | 13.22318200 | C | 7.70379400  | 7.78645300  | 14.77760900 |
| C | 4.39949900  | 9.45976300  | 13.36083800 | H | 8.13715100  | 8.54102800  | 14.10139100 |
| C | 4.21121900  | 10.94014000 | 13.77768800 | H | 8.04459400  | 8.04820500  | 15.79353400 |
| H | 5.17073300  | 11.47314300 | 13.67007000 | C | 8.16229000  | 6.38143500  | 14.37626200 |
| H | 3.91183300  | 11.01583500 | 14.83393800 | H | 7.98973000  | 5.68211600  | 15.21285000 |
| H | 4.95987400  | 9.40331200  | 12.41979800 | H | 7.53188800  | 6.01200000  | 13.55357100 |
| C | 5.73468100  | 3.64222100  | 5.47391600  | C | 9.63071000  | 6.29438600  | 13.94877500 |
| C | 6.10656600  | 4.39109800  | 4.20420900  | H | 10.28657700 | 6.59860000  | 14.78647300 |
| C | 7.43541000  | 5.13501700  | 4.37481800  | H | 9.80836500  | 7.03038600  | 13.14327100 |
| C | 8.55124400  | 4.18040800  | 4.81482100  | C | 10.02146400 | 4.90160200  | 13.45347300 |
| C | 8.16704300  | 3.44036000  | 6.09994200  | H | 9.40259100  | 4.61007700  | 12.58863500 |
| C | 6.83562100  | 2.70106400  | 5.95017500  | H | 11.07936900 | 4.85285100  | 13.14397300 |
| H | 7.70187900  | 5.64230700  | 3.43327500  | H | 9.86617400  | 4.14122100  | 14.23780600 |
| H | 6.18031200  | 3.64857000  | 3.39234500  | C | 5.25616400  | 9.22324300  | 16.65183300 |
| H | 5.28182300  | 5.07613600  | 3.95417700  | H | 5.40136400  | 8.50044200  | 17.47655800 |
| H | 8.74680200  | 3.45078300  | 4.00635800  | H | 4.20187600  | 9.54897400  | 16.71216400 |
| H | 9.48881000  | 4.73974800  | 4.96736300  | C | 6.19524800  | 10.41475200 | 16.82932500 |
| H | 8.95679200  | 2.73143500  | 6.39483900  | H | 6.07001600  | 11.12400500 | 15.99075800 |
| H | 8.07568100  | 4.16299600  | 6.92237000  | H | 7.24713300  | 10.07723700 | 16.76897700 |
| H | 6.91311800  | 1.88837000  | 5.20814400  | C | 6.00889200  | 11.18611900 | 18.14235400 |
| H | 6.52046300  | 2.25420900  | 6.90558900  | H | 4.96256900  | 11.53713500 | 18.20526100 |
| H | 7.30747700  | 5.92103300  | 5.13785900  | H | 6.14113200  | 10.48893000 | 18.99019700 |
| C | 4.58319200  | 7.59006700  | 8.52625100  | C | 6.95994100  | 12.37317300 | 18.29746000 |
| C | 4.43653400  | 8.70414700  | 9.36736600  | H | 6.82435400  | 13.09977100 | 17.47802600 |
| C | 4.78347600  | 7.78915600  | 7.15063100  | H | 6.80301300  | 12.90990500 | 19.24822700 |
| C | 4.51109900  | 10.00112300 | 8.85150800  | H | 8.01330200  | 12.04515700 | 18.26929700 |
| H | 4.25219600  | 8.55029000  | 10.43336400 | C | 4.31952300  | 6.27733600  | 15.18830200 |

|                           |             |             |             |   |             |             |             |
|---------------------------|-------------|-------------|-------------|---|-------------|-------------|-------------|
| H                         | 3.76805700  | 6.49107800  | 16.12017100 | H | 0.10256200  | 10.22455100 | 5.74881600  |
| H                         | 3.57135800  | 6.21605600  | 14.38642000 | C | 3.58036800  | 10.28072500 | 5.89985100  |
| C                         | 5.07090600  | 4.95206900  | 15.28820300 | H | 4.30376800  | 10.47336000 | 6.70370900  |
| H                         | 5.55129700  | 4.73789700  | 14.31999200 | H | 3.81547100  | 10.95726000 | 5.06182300  |
| H                         | 5.88769000  | 5.01619100  | 16.03193000 | H | 3.72098500  | 9.24969900  | 5.54578600  |
| C                         | 4.16207500  | 3.77330300  | 15.64971300 | C | 5.43790200  | 13.32430600 | 9.05445000  |
| H                         | 3.31789400  | 3.75475200  | 14.94121600 | C | 6.51794600  | 12.62924600 | 9.96412800  |
| H                         | 3.73143200  | 3.93878300  | 16.65569500 | O | 6.00232300  | 11.27703400 | 10.06330700 |
| C                         | 4.88226900  | 2.42756600  | 15.59527500 | O | 4.24856200  | 12.55346100 | 9.35663400  |
| H                         | 4.22121000  | 1.59591300  | 15.89236000 | C | 7.91996700  | 12.57706800 | 9.37277400  |
| H                         | 5.22746400  | 2.22804200  | 14.56806400 | H | 8.31366200  | 13.59240600 | 9.20961800  |
| H                         | 5.76305800  | 2.41127700  | 16.26198000 | H | 8.59497000  | 12.05517600 | 10.06702000 |
| Sn                        | 5.51068300  | 8.05007800  | 14.75614300 | H | 7.93545300  | 12.03852300 | 8.41655200  |
| O                         | 5.74178000  | 7.06138100  | 12.49064200 | C | 6.56010100  | 13.19582000 | 11.38463600 |
| C                         | 6.73403100  | 7.65192800  | 11.72665200 | H | 7.16732900  | 12.52946200 | 12.01446100 |
| H                         | 7.07122100  | 8.61909400  | 12.16165600 | H | 7.00556200  | 14.20127300 | 11.41070400 |
| H                         | 7.64524600  | 7.02420900  | 11.62480200 | H | 5.55222300  | 13.25208300 | 11.82139200 |
| H                         | 6.41474800  | 7.89421000  | 10.69580200 | C | 5.16757300  | 14.78726500 | 9.37829200  |
| Br                        | 3.65266000  | 3.50905800  | 11.96023100 | H | 6.07926500  | 15.39114300 | 9.24837800  |
|                           |             |             |             | H | 4.39748200  | 15.18013200 | 8.69801100  |
|                           |             |             |             | H | 4.80437200  | 14.91281000 | 10.40602800 |
| <b>TS<sub>2a-3a</sub></b> |             |             |             | C | 5.72017800  | 13.15581800 | 7.55871100  |
| Cu                        | 3.84632200  | 9.43170700  | 9.41319500  | H | 4.83226600  | 13.46629000 | 6.98979500  |
| C                         | 0.73296700  | 7.23123100  | 6.88827100  | H | 6.57109000  | 13.77336900 | 7.23568700  |
| C                         | 0.66965100  | 5.88180000  | 6.50281200  | H | 5.93186500  | 12.10725600 | 7.30670000  |
| C                         | 1.84954300  | 5.16454100  | 6.55221100  | H | -0.14535600 | 3.39130400  | 9.40209100  |
| C                         | 3.05424400  | 5.75260300  | 6.96108400  | H | 1.38527500  | 4.97423300  | 10.56759100 |
| C                         | 3.14639800  | 7.07319200  | 7.37920500  | H | -1.27727900 | 8.22630000  | 9.61619300  |
| C                         | 1.92953700  | 7.80654900  | 7.30345300  | H | -2.81065300 | 6.65531500  | 8.49732800  |
| O                         | 0.36781700  | 9.77198400  | 8.25300600  | O | -2.31994300 | 3.96841700  | 8.21878200  |
| P                         | 4.62434200  | 7.74376400  | 8.24462300  | C | -3.54073700 | 4.36238800  | 7.64679200  |
| B                         | 4.64147600  | 11.31202400 | 9.81150900  | H | -4.23733300 | 4.77415300  | 8.40034900  |
| S                         | 1.82129300  | 9.50559900  | 7.93154700  | H | -3.98856900 | 3.46297600  | 7.20206500  |
| O                         | 4.04301700  | 4.81651200  | 6.90889900  | H | -3.40291300 | 5.12045100  | 6.85262000  |
| O                         | 2.06229500  | 3.85116700  | 6.27535300  | C | -0.38534200 | 4.45473200  | 9.46868700  |
| H                         | -0.27017000 | 5.40512600  | 6.22719500  | C | 0.46269900  | 5.34331300  | 10.11530500 |
| H                         | -0.17088300 | 7.83800800  | 6.93264000  | C | 0.16836700  | 6.73043500  | 10.18551600 |
| C                         | 2.15528500  | 10.53626700 | 6.36694900  | C | -1.04082700 | 7.16245900  | 9.59818500  |
| C                         | 1.96247900  | 11.97286500 | 6.86141600  | C | -1.89617300 | 6.27014100  | 8.94922800  |
| H                         | 0.94298000  | 12.11264800 | 7.24728300  | C | -1.56997600 | 4.90930200  | 8.86768100  |
| H                         | 2.11562300  | 12.66626000 | 6.01810200  | C | 1.08296800  | 7.64142900  | 10.76961700 |
| H                         | 2.67761700  | 12.22930300 | 7.65613500  | C | 2.02636200  | 8.37642900  | 11.07090800 |
| C                         | 1.11315400  | 10.17049400 | 5.31823800  | C | 3.17651600  | 9.11490400  | 11.38232000 |
| H                         | 1.27532200  | 9.16188800  | 4.91194300  | C | 3.39664100  | 10.54041600 | 11.05658700 |
| H                         | 1.17225500  | 10.88913000 | 4.48450100  |   |             |             |             |

|                           |            |             |             |   |             |            |             |
|---------------------------|------------|-------------|-------------|---|-------------|------------|-------------|
| H                         | 2.48924000 | 11.12095400 | 10.85057000 | C | 3.56064600  | 4.70269800 | 8.87644300  |
| H                         | 4.02725400 | 11.05063600 | 11.80068400 | C | 4.48564700  | 3.85307300 | 8.24376800  |
| H                         | 3.93860200 | 8.61971600  | 11.99342300 | C | 5.66236100  | 4.42959500 | 7.79756800  |
| C                         | 3.37649000 | 3.53880000  | 6.80762900  | C | 5.91751700  | 5.79644200 | 7.96613100  |
| C                         | 4.11411500 | 2.63701500  | 5.84058000  | C | 5.04526400  | 6.65515600 | 8.62150900  |
| C                         | 3.22449500 | 2.93301700  | 8.19864300  | C | 3.82617200  | 6.06013400 | 9.04466100  |
| C                         | 3.45807700 | 1.25230300  | 5.77636400  | O | 1.86195100  | 5.96233800 | 10.82007800 |
| H                         | 5.15355200 | 2.55726500  | 6.19864600  | P | 5.50963300  | 8.34377200 | 9.17745100  |
| H                         | 4.13439800 | 3.12487800  | 4.85428500  | B | 4.16063600  | 7.95531000 | 12.70608100 |
| C                         | 2.56617100 | 1.55292600  | 8.12677100  | S | 2.59979300  | 7.00282600 | 9.99967100  |
| H                         | 4.23059300 | 2.87082200  | 8.64283700  | O | 7.12373000  | 6.09265600 | 7.40870700  |
| H                         | 2.64100000 | 3.62909300  | 8.81963900  | O | 6.71943900  | 3.84464300 | 7.17667700  |
| C                         | 3.32574600 | 0.62669600  | 7.17004800  | H | 4.29622300  | 2.78592300 | 8.12282400  |
| H                         | 4.04139900 | 0.59781300  | 5.10949500  | H | 2.63320200  | 4.30674600 | 9.29270400  |
| H                         | 2.45714000 | 1.35660000  | 5.32512100  | C | 1.36996700  | 7.58340000 | 8.67644400  |
| H                         | 2.51375000 | 1.11298200  | 9.13515700  | C | 0.27474500  | 8.23195200 | 9.52774500  |
| H                         | 1.52712600 | 1.67255800  | 7.77684700  | H | -0.19063000 | 7.49117700 | 10.19268300 |
| H                         | 2.81907900 | -0.34923800 | 7.09929200  | H | -0.49322500 | 8.65937800 | 8.86533500  |
| H                         | 4.33403100 | 0.42884900  | 7.57806800  | H | 0.68216700  | 9.05293500 | 10.13486700 |
| C                         | 5.19210100 | 6.30516100  | 9.23000500  | C | 0.84030000  | 6.38267200 | 7.90705700  |
| C                         | 6.39635800 | 5.63497500  | 8.98486200  | H | 1.60551200  | 5.94391200 | 7.25065500  |
| C                         | 4.35862100 | 5.88361900  | 10.27878900 | H | -0.00557800 | 6.70493200 | 7.27784800  |
| C                         | 6.75983500 | 4.54157300  | 9.77638500  | H | 0.47537100  | 5.61059200 | 8.60077100  |
| H                         | 7.04632300 | 5.95665500  | 8.16976500  | C | 2.08751000  | 8.59982500 | 7.80050600  |
| C                         | 4.72146100 | 4.78451900  | 11.05747800 | H | 2.51490500  | 9.41399700 | 8.40207400  |
| H                         | 3.42617300 | 6.41488500  | 10.48137300 | H | 1.36306100  | 9.06006500 | 7.11033100  |
| C                         | 5.92244600 | 4.11091100  | 10.80911800 | H | 2.88382400  | 8.13756100 | 7.19958700  |
| H                         | 7.70160300 | 4.02254300  | 9.58156500  | C | 3.46021200  | 6.39587600 | 14.23893500 |
| H                         | 4.06448100 | 4.45864200  | 11.86755600 | C | 4.92838900  | 6.08537100 | 13.76462700 |
| H                         | 6.20821500 | 3.25442700  | 11.42471300 | O | 5.32130600  | 7.34450600 | 13.14936800 |
| C                         | 5.93525700 | 8.02039000  | 7.00219600  | O | 3.05199000  | 7.41567300 | 13.29656700 |
| C                         | 6.82301900 | 9.07927400  | 7.25272700  | C | 5.91525900  | 5.75474600 | 14.87415600 |
| C                         | 6.08013700 | 7.24901000  | 5.83960900  | H | 5.59668500  | 4.85460800 | 15.42272500 |
| C                         | 7.84844200 | 9.36110100  | 6.34752800  | H | 6.90735100  | 5.55597100 | 14.44093200 |
| H                         | 6.69537000 | 9.68623200  | 8.15358700  | H | 6.01647100  | 6.58405800 | 15.58571500 |
| C                         | 7.10014200 | 7.54452400  | 4.93152000  | C | 4.97577700  | 5.01935400 | 12.66464600 |
| H                         | 5.40522400 | 6.41297700  | 5.65045800  | H | 5.97500800  | 5.01972700 | 12.20416500 |
| C                         | 7.98396500 | 8.59885600  | 5.18313200  | H | 4.78264000  | 4.01524100 | 13.06983200 |
| H                         | 8.53812700 | 10.18478600 | 6.54801000  | H | 4.23216100  | 5.22268900 | 11.88287700 |
| H                         | 7.20663400 | 6.94672400  | 4.02307100  | C | 2.49086900  | 5.22609200 | 14.12652100 |
| H                         | 8.77937700 | 8.82662600  | 4.46939200  | H | 2.85136200  | 4.35875600 | 14.70201600 |
|                           |            |             |             | H | 1.51136100  | 5.52182900 | 14.53096500 |
|                           |            |             |             | H | 2.34248400  | 4.94724500 | 13.07635700 |
| <b>TS<sub>2b-3b</sub></b> |            |             |             | C | 3.40006800  | 7.02506500 | 15.63149700 |
| Cu                        | 4.17038200 | 8.88889600  | 10.86444200 |   |             |            |             |

|   |             |             |             |                           |             |             |             |
|---|-------------|-------------|-------------|---------------------------|-------------|-------------|-------------|
| H | 2.38563400  | 7.41525500  | 15.79903400 | C                         | 9.65455400  | 8.42201800  | 9.06030700  |
| H | 3.62361700  | 6.29015600  | 16.41942200 | H                         | 8.06833000  | 9.08323600  | 7.75498200  |
| H | 4.10664700  | 7.86317100  | 15.72251900 | C                         | 8.96431700  | 7.38538700  | 11.13467200 |
| H | -2.79182200 | 11.66005500 | 8.77719800  | H                         | 6.83502100  | 7.30439300  | 11.49472600 |
| H | -0.95931100 | 11.37043500 | 10.39296400 | C                         | 9.98140500  | 7.79926700  | 10.26896800 |
| H | 1.92795300  | 12.20859700 | 7.30557200  | H                         | 10.44561500 | 8.76181000  | 8.38717000  |
| H | 0.06920500  | 12.54071600 | 5.67529200  | H                         | 9.21219300  | 6.92053600  | 12.09207700 |
| O | -2.41610700 | 12.30510900 | 6.13749400  | H                         | 11.02902900 | 7.65063200  | 10.54239900 |
| C | -3.77297500 | 12.15945700 | 6.47464200  | C                         | 5.42453500  | 9.39845100  | 7.67949100  |
| H | -4.00185800 | 11.13975400 | 6.83631300  | C                         | 4.97025500  | 10.71558400 | 7.84058900  |
| H | -4.34901100 | 12.34872500 | 5.55863100  | C                         | 5.75053100  | 8.93051400  | 6.39571200  |
| H | -4.08628600 | 12.88313600 | 7.24961500  | C                         | 4.85458800  | 11.55977500 | 6.73375800  |
| C | -1.76347700 | 11.78802100 | 8.43915800  | H                         | 4.67468300  | 11.06313800 | 8.83183500  |
| C | -0.72423000 | 11.62503900 | 9.35780200  | C                         | 5.62485200  | 9.77591700  | 5.29128900  |
| C | 0.62783000  | 11.76713300 | 8.98205000  | H                         | 6.10838200  | 7.90955700  | 6.25816800  |
| C | 0.89106900  | 12.10536200 | 7.62998800  | C                         | 5.17768600  | 11.09094000 | 5.45784700  |
| C | -0.13747000 | 12.28266700 | 6.71599500  | H                         | 4.49718800  | 12.58294400 | 6.87121400  |
| C | -1.47791900 | 12.12106400 | 7.10716000  | H                         | 5.87506800  | 9.40506200  | 4.29430200  |
| C | 1.68783100  | 11.53423900 | 9.89682700  | H                         | 5.07546700  | 11.74757000 | 4.59045600  |
| C | 2.64347100  | 11.23496100 | 10.61180600 |                           |             |             |             |
| C | 3.77925300  | 10.88478200 | 11.36268800 | <b>TS<sub>3a-4a</sub></b> |             |             |             |
| C | 3.74047400  | 9.98354200  | 12.52250700 | Cu                        | 6.18154600  | 8.47849600  | 10.37468700 |
| H | 2.74992000  | 9.81357100  | 12.95531000 | C                         | 4.18632800  | 4.16630700  | 8.35901100  |
| H | 4.49829100  | 10.19201500 | 13.28855300 | C                         | 4.75269900  | 3.34079900  | 7.37115500  |
| H | 4.67848700  | 11.49463200 | 11.22445700 | C                         | 5.84707500  | 3.83976700  | 6.68598800  |
| C | 7.78371600  | 4.83673200  | 7.15472400  | C                         | 6.36597000  | 5.10969700  | 6.96558000  |
| C | 8.42798300  | 4.85694700  | 5.78295000  | C                         | 5.83289100  | 5.95312800  | 7.93288100  |
| C | 8.77409300  | 4.54804400  | 8.27732100  | C                         | 4.69729500  | 5.43701700  | 8.61848400  |
| C | 9.20988500  | 3.56448400  | 5.52202800  | O                         | 3.18630000  | 5.25298100  | 10.80197600 |
| H | 9.10147700  | 5.72911300  | 5.75451700  | P                         | 6.64722000  | 7.51524900  | 8.45095600  |
| H | 7.64069100  | 5.01694200  | 5.03082800  | B                         | 5.30082600  | 9.13674200  | 13.19099700 |
| C | 9.55244000  | 3.25651400  | 8.01062900  | S                         | 3.97448500  | 6.31417300  | 10.03725400 |
| H | 9.45354000  | 5.41314200  | 8.34102600  | O                         | 7.42466700  | 5.34874900  | 6.15229200  |
| H | 8.22385300  | 4.50643800  | 9.23035000  | O                         | 6.57822300  | 3.25515400  | 5.70119000  |
| C | 10.22811500 | 3.29088800  | 6.63499200  | H                         | 4.36140300  | 2.34435600  | 7.16216100  |
| H | 9.71024700  | 3.62678300  | 4.54286900  | H                         | 3.35750300  | 3.81703700  | 8.97774600  |
| H | 8.49685700  | 2.72507600  | 5.46221000  | C                         | 2.62974400  | 7.38993400  | 9.21371400  |
| H | 10.29767800 | 3.10024300  | 8.80642500  | C                         | 2.07926200  | 8.17382500  | 10.40894300 |
| H | 8.85506600  | 2.40306400  | 8.05485400  | H                         | 1.70761400  | 7.49107200  | 11.18657700 |
| H | 10.75250900 | 2.34101000  | 6.44336500  | H                         | 1.24663000  | 8.81491400  | 10.07774600 |
| H | 10.99924700 | 4.08290400  | 6.62698800  | H                         | 2.86055600  | 8.81699800  | 10.84160000 |
| C | 7.29647600  | 8.18011000  | 9.56409800  | C                         | 1.58852600  | 6.45559900  | 8.61512900  |
| C | 8.31686100  | 8.61078800  | 8.70597500  | H                         | 1.97548600  | 5.93738900  | 7.72498100  |
| C | 7.62469000  | 7.58519500  | 10.79350100 | H                         | 0.70458600  | 7.04048200  | 8.31255300  |

|   |             |             |             |                           |             |             |             |
|---|-------------|-------------|-------------|---------------------------|-------------|-------------|-------------|
| H | 1.27666300  | 5.70493600  | 9.35553000  | H                         | 3.59169300  | 10.28530500 | 12.48016000 |
| C | 3.24922400  | 8.32228800  | 8.18259300  | H                         | 4.80537200  | 11.29378700 | 13.27353200 |
| H | 4.01914100  | 8.96529400  | 8.63210800  | H                         | 4.70764500  | 11.26412800 | 10.46840300 |
| H | 2.46093200  | 8.97748900  | 7.77599600  | C                         | 8.42268300  | 7.03963000  | 8.45473700  |
| H | 3.69225300  | 7.77484200  | 7.33893600  | C                         | 9.40133500  | 7.84223200  | 7.85482100  |
| C | 5.91631900  | 6.91375600  | 13.27750200 | C                         | 8.81386300  | 5.90629400  | 9.18413000  |
| C | 6.54743600  | 7.71977500  | 14.47092100 | C                         | 10.75231100 | 7.50928000  | 7.97634500  |
| O | 5.77569300  | 8.95144200  | 14.45327400 | H                         | 9.11342600  | 8.73721700  | 7.30298900  |
| O | 5.48040700  | 8.00264000  | 12.40614600 | C                         | 10.16462700 | 5.57259500  | 9.29604200  |
| C | 6.39748700  | 7.06432400  | 15.83536300 | H                         | 8.05853300  | 5.27814800  | 9.66287500  |
| H | 6.90063800  | 6.08514800  | 15.85128700 | C                         | 11.13795600 | 6.37508700  | 8.69309100  |
| H | 6.86244700  | 7.70097700  | 16.60234800 | H                         | 11.50918700 | 8.15187700  | 7.52323900  |
| H | 5.34313200  | 6.92279900  | 16.10357000 | H                         | 10.45817700 | 4.68517800  | 9.86229500  |
| C | 8.00221900  | 8.11576800  | 14.21537600 | H                         | 12.19631000 | 6.12429900  | 8.79231500  |
| H | 8.31308800  | 8.84586200  | 14.97626700 | C                         | 6.48968800  | 8.68386200  | 7.04443600  |
| H | 8.67515200  | 7.24749000  | 14.26989800 | C                         | 6.60069600  | 10.05365500 | 7.33624600  |
| H | 8.11047500  | 8.59026700  | 13.23077900 | C                         | 6.26279400  | 8.28028200  | 5.71992500  |
| C | 6.88723900  | 6.03708600  | 12.49966500 | C                         | 6.50332200  | 11.00145600 | 6.31524500  |
| H | 7.36599900  | 5.30329500  | 13.16575900 | H                         | 6.76459900  | 10.37379800 | 8.36709400  |
| H | 6.34014900  | 5.48175400  | 11.72353600 | C                         | 6.15221700  | 9.23330700  | 4.70463100  |
| H | 7.66774000  | 6.63597800  | 12.01149000 | H                         | 6.18241400  | 7.22323100  | 5.47397800  |
| C | 4.67158200  | 6.12380800  | 13.67618000 | C                         | 6.27590700  | 10.59450100 | 4.99783500  |
| H | 4.15728400  | 5.75102700  | 12.77888000 | H                         | 6.59566600  | 12.06325700 | 6.55550100  |
| H | 4.94171900  | 5.26064400  | 14.30238600 | H                         | 5.97093700  | 8.90829800  | 3.67715400  |
| H | 3.96977400  | 6.75387700  | 14.24249800 | H                         | 6.19116200  | 11.33681600 | 4.20048200  |
| H | 12.12301400 | 8.44185100  | 11.17239900 | C                         | 7.70904900  | 4.11686700  | 5.43873000  |
| H | 9.70242300  | 8.34638600  | 11.72082800 | C                         | 8.98381300  | 3.50678300  | 6.00616600  |
| H | 9.00453800  | 11.73388800 | 9.15183000  | C                         | 7.80615000  | 4.42350300  | 3.95525600  |
| H | 11.38997800 | 11.78317600 | 8.55229900  | C                         | 10.19206400 | 4.40020100  | 5.70705300  |
| O | 13.25602300 | 10.03095600 | 9.54705600  | H                         | 9.10499400  | 2.51026800  | 5.55007400  |
| C | 13.80897900 | 10.97200400 | 8.66302400  | H                         | 8.85137300  | 3.36496100  | 7.08996200  |
| H | 13.35708900 | 10.91013800 | 7.65495600  | C                         | 9.01703800  | 5.31732800  | 3.66228500  |
| H | 13.69041400 | 12.00727300 | 9.03304100  | H                         | 7.89531800  | 3.46151400  | 3.42450400  |
| H | 14.88079800 | 10.74356000 | 8.58471900  | H                         | 6.86334900  | 4.89240700  | 3.63392100  |
| C | 11.42577600 | 9.16502700  | 10.74559200 | C                         | 10.30964900 | 4.70025500  | 4.20897000  |
| C | 10.07550000 | 9.12463000  | 11.05426500 | H                         | 11.10953500 | 3.92113900  | 6.08293200  |
| C | 9.15937900  | 10.04974600 | 10.49720000 | H                         | 10.08056500 | 5.34221900  | 6.26457500  |
| C | 9.68304600  | 11.00601700 | 9.60158200  | H                         | 9.09519300  | 5.48990600  | 2.57722000  |
| C | 11.03887200 | 11.03330700 | 9.26157400  | H                         | 8.85310400  | 6.30164100  | 4.13203400  |
| C | 11.92282900 | 10.10906100 | 9.83239500  | H                         | 11.15859300 | 5.37806500  | 4.02487100  |
| C | 7.75040500  | 9.94821300  | 10.73515600 | H                         | 10.52850200 | 3.76586500  | 3.65983100  |
| C | 6.61821500  | 10.48068200 | 10.97228400 |                           |             |             |             |
| C | 5.28372700  | 10.68885900 | 11.20141900 | <b>TS<sub>3b-4b</sub></b> |             |             |             |
| C | 4.68229900  | 10.44041900 | 12.57978700 | Cu                        | 4.65676200  | 6.91892900  | 9.45470900  |

|   |             |             |             |   |             |             |             |
|---|-------------|-------------|-------------|---|-------------|-------------|-------------|
| C | 0.87947500  | 5.02463600  | 7.84935100  | H | 9.21954900  | 12.72266900 | 12.60186800 |
| C | 0.55355600  | 3.68377600  | 7.57068600  | H | 9.81741200  | 11.84747200 | 14.03456600 |
| C | 1.60749500  | 2.80076300  | 7.41276700  | H | 10.57477000 | 11.58509300 | 12.43724600 |
| C | 2.93979200  | 3.22430800  | 7.51434100  | H | 6.44133300  | 5.25587900  | 15.49706700 |
| C | 3.29727500  | 4.52982800  | 7.81503000  | H | 6.72120100  | 6.59712300  | 13.39515200 |
| C | 2.20666200  | 5.43116200  | 7.95532200  | H | 2.55963500  | 6.01087100  | 12.48603400 |
| O | 1.19281000  | 7.61228700  | 9.12575200  | H | 2.26352900  | 4.71980400  | 14.57149100 |
| P | 4.99256100  | 5.03586000  | 8.33006300  | O | 4.29596900  | 4.18796700  | 16.33395300 |
| B | 8.23446100  | 9.16695800  | 10.99719700 | C | 3.06717700  | 3.63724700  | 16.73612000 |
| S | 2.48737800  | 7.14583100  | 8.49910200  | H | 2.29784600  | 4.41498900  | 16.89629500 |
| O | 3.76039300  | 2.15910600  | 7.30516600  | H | 3.24905200  | 3.11653300  | 17.68618700 |
| O | 1.57642300  | 1.46291400  | 7.17715400  | H | 2.67862300  | 2.90974500  | 15.99913800 |
| H | -0.48158000 | 3.34603600  | 7.50817500  | C | 5.59719300  | 5.44077300  | 14.82929500 |
| H | 0.09924500  | 5.76319200  | 8.04258000  | C | 5.74688400  | 6.18771800  | 13.66874800 |
| C | 2.61862800  | 8.09473400  | 6.85393600  | C | 4.65224200  | 6.41716900  | 12.80101900 |
| C | 2.86870700  | 9.52843800  | 7.33000700  | C | 3.41093400  | 5.86099200  | 13.15460800 |
| H | 2.04012700  | 9.88030900  | 7.96092100  | C | 3.24717200  | 5.12295700  | 14.33072700 |
| H | 2.95794600  | 10.19549600 | 6.45781900  | C | 4.34500800  | 4.90360700  | 15.17579500 |
| H | 3.80307200  | 9.58712300  | 7.91048900  | C | 4.84553700  | 7.11103600  | 11.55442700 |
| C | 1.28968200  | 7.96291600  | 6.12429800  | C | 5.44739400  | 8.06142600  | 10.95754900 |
| H | 1.13878900  | 6.94522100  | 5.73513800  | C | 6.05098400  | 8.78893800  | 9.95531500  |
| H | 1.27011600  | 8.66082200  | 5.27140900  | C | 7.55754600  | 8.61295600  | 9.69823000  |
| H | 0.45769000  | 8.21456800  | 6.79817800  | H | 7.85272100  | 9.16028700  | 8.78992400  |
| C | 3.79992400  | 7.55800900  | 6.05956100  | H | 7.80471300  | 7.54806200  | 9.56291600  |
| H | 4.73008400  | 7.61989800  | 6.64245000  | H | 5.63755600  | 9.77640000  | 9.71591600  |
| H | 3.93007500  | 8.16670900  | 5.14978900  | C | 5.50952300  | 3.61564700  | 9.37017000  |
| H | 3.65197900  | 6.51452100  | 5.74605200  | C | 6.41022300  | 2.62532600  | 8.95927800  |
| C | 8.61824300  | 10.65262200 | 12.67380600 | C | 4.96050800  | 3.56411100  | 10.66176400 |
| C | 9.07474800  | 9.21131000  | 13.12097800 | C | 6.74621600  | 1.58514400  | 9.83025600  |
| O | 8.49550300  | 8.37704300  | 12.09185300 | H | 6.84486800  | 2.66142800  | 7.95920000  |
| O | 8.47577200  | 10.49621400 | 11.24168900 | C | 5.29111300  | 2.51976200  | 11.52546700 |
| C | 10.59113600 | 9.01344700  | 13.05570200 | H | 4.29278800  | 4.35894200  | 10.99883300 |
| H | 11.10852000 | 9.55745200  | 13.85978700 | C | 6.18507300  | 1.52708900  | 11.11003500 |
| H | 10.81181300 | 7.94125900  | 13.16246100 | H | 7.45341500  | 0.81691800  | 9.50737200  |
| H | 10.99486900 | 9.34910300  | 12.08934700 | H | 4.86578400  | 2.50178500  | 12.53157100 |
| C | 8.54399700  | 8.76798500  | 14.47866900 | H | 6.45620100  | 0.71510300  | 11.78933600 |
| H | 8.91183500  | 7.75674100  | 14.70869800 | C | 6.05303500  | 4.98550500  | 6.84067700  |
| H | 8.89264300  | 9.44635100  | 15.27298000 | C | 7.07269100  | 5.94892200  | 6.77245300  |
| H | 7.44767700  | 8.73815100  | 14.49536800 | C | 5.89205800  | 4.07446600  | 5.78455200  |
| C | 7.23670200  | 11.03196700 | 13.21429100 | C | 7.92939800  | 5.99261100  | 5.67068500  |
| H | 7.26223100  | 11.23428600 | 14.29505300 | H | 7.17917400  | 6.67512100  | 7.58196100  |
| H | 6.89316600  | 11.93979400 | 12.69719500 | C | 6.74427900  | 4.12989500  | 4.67880700  |
| H | 6.50286000  | 10.23591100 | 13.02094800 | H | 5.11058200  | 3.31586200  | 5.82997000  |
| C | 9.62281000  | 11.76160200 | 12.95415200 | C | 7.76403300  | 5.08497700  | 4.62074800  |

|                             |             |             |             |   |             |             |             |
|-----------------------------|-------------|-------------|-------------|---|-------------|-------------|-------------|
| H                           | 8.72034700  | 6.74500400  | 5.62854500  | H | -0.89567300 | 5.72176800  | 9.56211500  |
| H                           | 6.61147300  | 3.42125600  | 3.85758200  | C | 1.62875800  | 7.81725600  | 8.41839500  |
| H                           | 8.42771800  | 5.12419400  | 3.75357900  | H | 2.57070500  | 8.17325000  | 8.85692900  |
| C                           | 2.93335700  | 0.97950200  | 7.38147500  | H | 1.07275000  | 8.70323700  | 8.06729400  |
| C                           | 3.29821800  | 0.01514900  | 6.27089200  | H | 1.86506700  | 7.20284700  | 7.54037200  |
| C                           | 3.05500200  | 0.36648200  | 8.77214800  | C | 4.81249200  | 12.33177100 | 9.49875100  |
| C                           | 2.49201600  | -1.28402600 | 6.38291000  | C | 4.01589600  | 11.81149000 | 10.74839000 |
| H                           | 4.37731900  | -0.19070700 | 6.36162300  | O | 5.06781300  | 11.20609100 | 11.52623100 |
| H                           | 3.13223900  | 0.51665500  | 5.30542600  | O | 5.87006500  | 11.35544500 | 9.39060500  |
| C                           | 2.24858600  | -0.93103000 | 8.87739100  | C | 3.33878700  | 12.88851700 | 11.58545700 |
| H                           | 4.12611800  | 0.18178900  | 8.95338100  | H | 2.60130100  | 13.44506800 | 10.98526000 |
| H                           | 2.73321100  | 1.11173000  | 9.51620800  | H | 2.80778900  | 12.41617400 | 12.42528900 |
| C                           | 2.63941400  | -1.91772800 | 7.77114700  | H | 4.06859800  | 13.59758200 | 11.99864500 |
| H                           | 2.81307000  | -1.98654000 | 5.59777000  | C | 3.01752700  | 10.71047500 | 10.38458700 |
| H                           | 1.42911900  | -1.05866400 | 6.19305700  | H | 2.64879000  | 10.24233800 | 11.30572600 |
| H                           | 2.39767900  | -1.38151500 | 9.87126200  | H | 2.15879400  | 11.10413600 | 9.82086300  |
| H                           | 1.17489400  | -0.69277800 | 8.79316300  | H | 3.50652900  | 9.92566900  | 9.79179300  |
| H                           | 2.02466800  | -2.82965600 | 7.83803800  | C | 4.00606400  | 12.36697100 | 8.20718200  |
| H                           | 3.68828000  | -2.23425200 | 7.91842600  | H | 3.14171200  | 13.04182100 | 8.31273900  |
|                             |             |             |             | H | 4.63206500  | 12.74334800 | 7.38323700  |
|                             |             |             |             | H | 3.64220600  | 11.37098200 | 7.93040800  |
| <b>TS<sub>4'a-4'b</sub></b> |             |             |             | C | 5.47591300  | 13.69192000 | 9.73997600  |
| Cu                          | 4.74840700  | 5.82754200  | 11.33922100 | H | 6.19630900  | 13.88266800 | 8.93031400  |
| C                           | 1.42432200  | 3.54442800  | 8.69261700  | H | 4.73932500  | 14.50976900 | 9.75328400  |
| C                           | 1.67343600  | 2.55447900  | 7.72655000  | H | 6.02396600  | 13.69793100 | 10.69335500 |
| C                           | 2.79679900  | 2.72490700  | 6.93987300  | H | 1.72844600  | 10.54150300 | 14.53165500 |
| C                           | 3.64002500  | 3.83058400  | 7.09901600  | H | 3.86526600  | 9.94622500  | 13.37469500 |
| C                           | 3.44485200  | 4.81339700  | 8.06054000  | H | 2.50911100  | 5.86416300  | 13.05446100 |
| C                           | 2.26786100  | 4.64134900  | 8.84224600  | H | 0.39989200  | 6.45650700  | 14.11613900 |
| O                           | 0.86971300  | 4.94094400  | 11.10153100 | O | -0.23459400 | 8.98719600  | 15.01620200 |
| P                           | 4.71325100  | 6.09914200  | 8.47349200  | C | -1.26891500 | 8.06083300  | 15.19297000 |
| B                           | 6.03926400  | 10.77532900 | 10.64291400 | H | -1.62138900 | 7.63895900  | 14.23193600 |
| S                           | 1.87611300  | 5.71914600  | 10.27045500 | H | -2.10220200 | 8.59647600  | 15.67188100 |
| O                           | 4.64053500  | 3.75150400  | 6.16775800  | H | -0.97016600 | 7.21612200  | 15.84346700 |
| O                           | 3.27789000  | 1.92399100  | 5.94204800  | C | 1.91550300  | 9.51959600  | 14.19073200 |
| H                           | 1.03039100  | 1.67992900  | 7.61714800  | C | 3.10373400  | 9.18457000  | 13.55109600 |
| H                           | 0.59629300  | 3.45142700  | 9.39811200  | C | 3.35015300  | 7.86137300  | 13.09485600 |
| C                           | 0.79436400  | 7.06013400  | 9.43640800  | C | 2.35130900  | 6.89895300  | 13.36174000 |
| C                           | 0.40063100  | 7.95441100  | 10.61492100 | C | 1.14755000  | 7.23836700  | 13.98201200 |
| H                           | -0.14750900 | 7.38111600  | 11.37399100 | C | 0.91624100  | 8.55508100  | 14.39900300 |
| H                           | -0.24153500 | 8.77441300  | 10.25199100 | C | 4.58411000  | 7.51748300  | 12.44058000 |
| H                           | 1.28184700  | 8.39266900  | 11.10331000 | C | 5.34639000  | 7.92238100  | 11.47956900 |
| C                           | -0.42751100 | 6.39053600  | 8.82445400  | C | 6.28788200  | 8.42898100  | 10.65082100 |
| H                           | -0.16678700 | 5.80496500  | 7.93048200  | C | 7.09411300  | 9.68485400  | 10.99415200 |
| H                           | -1.16242500 | 7.15970100  | 8.53100700  |   |             |             |             |



|    |            |             |             |    |             |             |             |
|----|------------|-------------|-------------|----|-------------|-------------|-------------|
| H  | 8.00505400 | 9.74308300  | 10.37803300 | Cu | 3.87372900  | 6.61672900  | 10.49525100 |
| H  | 7.38379200 | 9.70139000  | 12.05859600 | C  | 1.34309400  | 3.37429500  | 8.57407800  |
| H  | 6.48656100 | 7.95090600  | 9.69046500  | C  | 1.60695000  | 2.40156700  | 7.59203200  |
| C  | 4.61468600 | 2.41436800  | 5.65759700  | C  | 2.73098500  | 2.58900300  | 6.80728000  |
| C  | 4.83847100 | 2.43028400  | 4.15709800  | C  | 3.57363100  | 3.69705500  | 6.98104500  |
| C  | 5.63837600 | 1.55936200  | 6.40052000  | C  | 3.35545900  | 4.66599600  | 7.94968800  |
| C  | 4.89714100 | 1.00762900  | 3.59096700  | C  | 2.18153900  | 4.47382000  | 8.73333400  |
| H  | 5.78822100 | 2.96019000  | 3.97813500  | O  | 0.90606800  | 4.80929000  | 11.06086600 |
| H  | 4.03353500 | 3.02096000  | 3.69407700  | P  | 4.55526800  | 5.97927500  | 8.41383300  |
| C  | 5.68981400 | 0.13922400  | 5.83200200  | B  | 6.11262400  | 10.64320400 | 10.79469100 |
| H  | 6.61425100 | 2.06083100  | 6.30392500  | S  | 1.78566700  | 5.59031800  | 10.11403400 |
| H  | 5.38597000 | 1.56408800  | 7.47200500  | O  | 4.57870000  | 3.63762300  | 6.07020700  |
| C  | 5.94350000 | 0.15611300  | 4.32001400  | O  | 3.21086600  | 1.80809700  | 5.80834300  |
| H  | 5.11017900 | 1.04464300  | 2.51003700  | H  | 0.96665000  | 1.52830800  | 7.46311700  |
| H  | 3.90364400 | 0.54156400  | 3.70494300  | H  | 0.50033300  | 3.26454700  | 9.25869400  |
| H  | 6.46892800 | -0.44326500 | 6.34957100  | C  | 0.66408700  | 6.90422200  | 9.31694000  |
| H  | 4.72841500 | -0.36216500 | 6.03527800  | C  | 0.35956700  | 7.84648900  | 10.48350600 |
| H  | 5.94344100 | -0.87099700 | 3.91839500  | H  | -0.13979000 | 7.31752500  | 11.30548500 |
| H  | 6.94966400 | 0.57099400  | 4.12476800  | H  | -0.29986300 | 8.65425400  | 10.12843800 |
| C  | 4.56119200 | 7.30237900  | 7.06808400  | H  | 1.27677600  | 8.30021800  | 10.88375600 |
| C  | 5.03417200 | 8.60730900  | 7.27842900  | C  | -0.58751400 | 6.19670900  | 8.81722300  |
| C  | 4.04036500 | 6.96691700  | 5.80758200  | H  | -0.37906600 | 5.56303900  | 7.94271100  |
| C  | 5.02048600 | 9.54466300  | 6.24162200  | H  | -1.33270200 | 6.95265400  | 8.52167600  |
| H  | 5.41658400 | 8.89834800  | 8.25910600  | H  | -1.02191800 | 5.57687700  | 9.61488100  |
| C  | 4.00101800 | 7.91331500  | 4.78105300  | C  | 1.43109800  | 7.61352000  | 8.21031800  |
| H  | 3.68043300 | 5.95611300  | 5.61795500  | H  | 2.35062500  | 8.08347100  | 8.58752900  |
| C  | 4.49904400 | 9.20346300  | 4.99148200  | H  | 0.79898500  | 8.41751700  | 7.80014600  |
| H  | 5.41776700 | 10.54344100 | 6.42873400  | H  | 1.69187600  | 6.94037000  | 7.38217200  |
| H  | 3.58890300 | 7.63653600  | 3.80662300  | C  | 4.97166800  | 12.17446400 | 9.53685400  |
| H  | 4.47878100 | 9.93914600  | 4.18278300  | C  | 4.08585600  | 11.67951900 | 10.73666700 |
| C  | 6.29873700 | 5.26374800  | 7.98988000  | O  | 5.07552700  | 11.07813400 | 11.59577400 |
| C  | 6.74002300 | 4.17434000  | 8.75966800  | O  | 6.03441500  | 11.19289400 | 9.52319700  |
| C  | 7.10785400 | 5.71806000  | 6.93645800  | C  | 3.35973300  | 12.77448300 | 11.50577500 |
| C  | 7.94749100 | 3.54059100  | 8.46119300  | H  | 2.66988300  | 13.32480200 | 10.84674300 |
| H  | 6.13041600 | 3.81410900  | 9.59270700  | H  | 2.76982400  | 12.32239100 | 12.31692700 |
| C  | 8.31953800 | 5.08570600  | 6.64664400  | H  | 4.06485500  | 13.48639300 | 11.95391100 |
| H  | 6.78903100 | 6.56265200  | 6.32590700  | C  | 3.10168500  | 10.57763000 | 10.32733300 |
| C  | 8.74317100 | 3.98942800  | 7.40294900  | H  | 2.66792700  | 10.13758700 | 11.23473600 |
| H  | 8.26677700 | 2.69016500  | 9.06959800  | H  | 2.28683400  | 10.97050600 | 9.70147100  |
| H  | 8.93431000 | 5.45379200  | 5.82039500  | H  | 3.61976300  | 9.77606300  | 9.78190600  |
| H  | 9.69138100 | 3.49488200  | 7.17443400  | C  | 4.26075000  | 12.18238900 | 8.19031800  |
| Br | 4.37865500 | 3.51228200  | 11.38976900 | H  | 3.39548900  | 12.86313500 | 8.21733100  |
|    |            |             |             | H  | 4.94592500  | 12.53850500 | 7.40586100  |
|    |            |             |             | H  | 3.91034500  | 11.18238900 | 7.90942700  |

TS<sub>4a-4b</sub>

|   |             |             |             |                            |             |             |             |
|---|-------------|-------------|-------------|----------------------------|-------------|-------------|-------------|
| C | 5.61819200  | 13.53790400 | 9.79728500  | C                          | 4.17805100  | 6.87774700  | 5.73317600  |
| H | 6.39281400  | 13.71365600 | 9.03621800  | C                          | 5.34985700  | 9.35944200  | 6.27947800  |
| H | 4.88370200  | 14.35525300 | 9.74320300  | H                          | 5.53352300  | 8.67495200  | 8.31350300  |
| H | 6.09930200  | 13.56418100 | 10.78562700 | C                          | 4.30827200  | 7.83057900  | 4.71955100  |
| H | 2.00336800  | 10.63283500 | 14.91817900 | H                          | 3.73389700  | 5.90835500  | 5.50807100  |
| H | 3.89470300  | 9.95103400  | 13.43862100 | C                          | 4.90202100  | 9.06758700  | 4.98791200  |
| H | 2.05885100  | 6.07074000  | 12.95701900 | H                          | 5.81119600  | 10.32082700 | 6.50892700  |
| H | 0.19353700  | 6.75798200  | 14.36447600 | H                          | 3.95078900  | 7.60064100  | 3.71288400  |
| O | -0.03139000 | 9.23563700  | 15.53974400 | H                          | 5.01192000  | 9.80561300  | 4.18967100  |
| C | -1.10720700 | 8.38773200  | 15.84284800 | C                          | 6.19009900  | 5.16077900  | 8.43121100  |
| H | -1.65944000 | 8.07582400  | 14.93585300 | C                          | 6.67679500  | 4.73916700  | 9.67890800  |
| H | -1.78731000 | 8.95516900  | 16.49343800 | C                          | 6.97477900  | 4.98615100  | 7.28155400  |
| H | -0.78021100 | 7.47610400  | 16.37746800 | C                          | 7.91863700  | 4.10647300  | 9.76795500  |
| C | 2.03119900  | 9.63621700  | 14.47125800 | H                          | 6.09286100  | 4.93071900  | 10.58338200 |
| C | 3.08605500  | 9.25155900  | 13.65520900 | C                          | 8.21891500  | 4.36164300  | 7.37734800  |
| C | 3.13030900  | 7.95573400  | 13.06780800 | H                          | 6.61080900  | 5.33833000  | 6.31627600  |
| C | 2.06657000  | 7.07923600  | 13.37331200 | C                          | 8.68769800  | 3.91337800  | 8.61763200  |
| C | 0.99483600  | 7.47334000  | 14.17761500 | H                          | 8.29289700  | 3.78425300  | 10.74204500 |
| C | 0.96600200  | 8.75834500  | 14.73621700 | H                          | 8.83004600  | 4.22972600  | 6.48104100  |
| C | 4.23937500  | 7.58524900  | 12.23923200 | H                          | 9.66434600  | 3.42852300  | 8.68904200  |
| C | 5.19862400  | 7.90709500  | 11.43740700 |                            |             |             |             |
| C | 6.31728800  | 8.31788300  | 10.78294000 |                            |             |             |             |
| C | 7.11564400  | 9.53774500  | 11.24797400 | <b>TSS<sub>a-6'a</sub></b> |             |             |             |
| H | 8.08944100  | 9.57589500  | 10.73787300 | Cu                         | 4.95904700  | 6.51572400  | 11.52376400 |
| H | 7.28535700  | 9.53443700  | 12.33762300 | C                          | 1.44559300  | 3.50558000  | 9.32578700  |
| H | 6.59776900  | 7.86765000  | 9.83069000  | C                          | 1.77785900  | 2.48129400  | 8.42306200  |
| C | 4.52233600  | 2.33040300  | 5.45701300  | C                          | 2.96093300  | 2.63145000  | 7.72559800  |
| C | 4.62567900  | 2.46126100  | 3.94982700  | C                          | 3.80545600  | 3.72704800  | 7.94058000  |
| C | 5.60181100  | 1.43840800  | 6.05734700  | C                          | 3.52373700  | 4.74685000  | 8.84256900  |
| C | 4.65059000  | 1.08355100  | 3.27768600  | C                          | 2.26769600  | 4.61402700  | 9.50180700  |
| H | 5.55489700  | 3.01372800  | 3.73436000  | O                          | 0.56902100  | 5.14500600  | 11.50468800 |
| H | 3.78329200  | 3.07403600  | 3.59455400  | P                          | 4.77245500  | 6.02961100  | 9.31649200  |
| C | 5.62161600  | 0.06407200  | 5.38088700  | B                          | 4.81183400  | 11.96443600 | 10.01935200 |
| H | 6.56487500  | 1.95699200  | 5.92234600  | S                          | 1.64401400  | 5.85371700  | 10.69361100 |
| H | 5.42995700  | 1.35893600  | 7.14225500  | O                          | 4.88561400  | 3.61494300  | 7.11050400  |
| C | 5.75706600  | 0.19645700  | 3.85972800  | O                          | 3.49839300  | 1.81466200  | 6.77208300  |
| H | 4.77988900  | 1.20579100  | 2.19094100  | H                          | 1.14010500  | 1.60819200  | 8.27762400  |
| H | 3.67210100  | 0.59765700  | 3.42912300  | H                          | 0.54501000  | 3.45087900  | 9.94017000  |
| H | 6.44356600  | -0.54098700 | 5.79425400  | C                          | 0.60129100  | 6.93167300  | 9.49051800  |
| H | 4.68439300  | -0.46535100 | 5.62116200  | C                          | 0.02512400  | 8.00132900  | 10.41867800 |
| H | 5.73253000  | -0.79832900 | 3.38710100  | H                          | -0.61975200 | 7.55497200  | 11.18647900 |
| H | 6.74239700  | 0.63496200  | 3.61737900  | H                          | -0.57438800 | 8.71679300  | 9.83102500  |
| C | 4.63231000  | 7.16611000  | 7.02907400  | H                          | 0.81963100  | 8.55844900  | 10.93276800 |
| C | 5.20281300  | 8.42159300  | 7.30280100  | C                          | -0.50902200 | 6.08847300  | 8.88220300  |
|   |             |             |             | H                          | -0.12624000 | 5.38634500  | 8.12767500  |

|   |             |             |             |   |             |             |             |
|---|-------------|-------------|-------------|---|-------------|-------------|-------------|
| H | -1.24782500 | 6.74799300  | 8.39491700  | C | 6.11236700  | 11.34205800 | 10.63985100 |
| H | -1.01808400 | 5.51773700  | 9.67333900  | H | 6.50961100  | 10.60320200 | 9.91805900  |
| C | 1.51665400  | 7.54686400  | 8.44729400  | H | 6.89248000  | 12.12219800 | 10.69164800 |
| H | 2.36762100  | 8.06069800  | 8.91358400  | H | 6.30323000  | 11.25466000 | 12.86916200 |
| H | 0.96121300  | 8.29625600  | 7.85812900  | C | 4.83455000  | 2.29516500  | 6.52640500  |
| H | 1.90889100  | 6.79594500  | 7.74961700  | C | 5.08550900  | 2.41571500  | 5.03304900  |
| C | 3.43354800  | 13.07462500 | 8.56723900  | C | 6.52009100  | 2.87951100  | 4.75729300  |
| C | 2.58983900  | 12.34522800 | 9.68218800  | C | 7.54103000  | 1.95216600  | 5.42653400  |
| O | 3.60240100  | 12.01453800 | 10.65609300 | C | 7.27916400  | 1.83924300  | 6.93163500  |
| O | 4.74633500  | 12.49212800 | 8.74755800  | C | 5.84594700  | 1.39156400  | 7.22512100  |
| C | 1.52334100  | 13.19928100 | 10.35520900 | H | 6.69227900  | 2.93231200  | 3.66974300  |
| H | 0.77718300  | 13.54272500 | 9.62158100  | H | 4.90534600  | 1.42432600  | 4.58509600  |
| H | 1.00468200  | 12.59712200 | 11.11575900 | H | 4.34213700  | 3.11102300  | 4.61371700  |
| H | 1.95908000  | 14.07406700 | 10.85502500 | H | 7.48525700  | 0.95043600  | 4.95969100  |
| C | 1.98750100  | 11.02127800 | 9.21148900  | H | 8.56283300  | 2.32619400  | 5.24973400  |
| H | 1.63133000  | 10.46609300 | 10.08878400 | H | 7.99234400  | 1.14358500  | 7.40152600  |
| H | 1.14097200  | 11.17554900 | 8.52607700  | H | 7.44383400  | 2.81784200  | 7.40155600  |
| H | 2.73797600  | 10.39962500 | 8.70530800  | H | 5.66776100  | 0.36361300  | 6.86635800  |
| C | 2.96681700  | 12.81059100 | 7.14090800  | H | 5.63785000  | 1.40864700  | 8.30624900  |
| H | 1.93698900  | 13.17331300 | 6.99716700  | H | 6.64396500  | 3.90109600  | 5.15362800  |
| H | 3.62010600  | 13.34257400 | 6.43256900  | C | 4.73755800  | 7.23646800  | 7.92707400  |
| H | 2.99923300  | 11.74168000 | 6.89680600  | C | 5.05243100  | 8.56493800  | 8.24452900  |
| C | 3.57660800  | 14.57893900 | 8.80940000  | C | 4.43216300  | 6.90240600  | 6.59846600  |
| H | 4.34219900  | 14.97770800 | 8.12739500  | C | 5.07188100  | 9.54889800  | 7.25117200  |
| H | 2.63195500  | 15.11213700 | 8.62545900  | H | 5.26795600  | 8.81993900  | 9.28543300  |
| H | 3.89887900  | 14.78449600 | 9.84051800  | C | 4.43419600  | 7.88697300  | 5.60819300  |
| H | 0.44435600  | 10.70852000 | 13.29124200 | H | 4.20464100  | 5.86792900  | 6.33824400  |
| H | 2.86479900  | 10.69669300 | 12.65783600 | C | 4.75507400  | 9.21000200  | 5.93242100  |
| H | 3.01748800  | 6.46972900  | 13.45354500 | H | 5.30852600  | 10.58146400 | 7.51205400  |
| H | 0.65591800  | 6.45915000  | 14.02440600 | H | 4.18880500  | 7.61940100  | 4.57677500  |
| O | -0.95483900 | 8.68130000  | 13.95600700 | H | 4.75703100  | 9.97987900  | 5.15607400  |
| C | -1.64269300 | 7.48578300  | 14.23993700 | C | 6.41089900  | 5.21567900  | 9.03849300  |
| H | -1.51818000 | 6.73854200  | 13.43579600 | C | 6.84235400  | 4.26952500  | 9.98400900  |
| H | -2.70639700 | 7.74792100  | 14.33307400 | C | 7.30810000  | 5.65126600  | 8.05161200  |
| H | -1.30227000 | 7.03047300  | 15.18837600 | C | 8.15216300  | 3.78915700  | 9.94831400  |
| C | 1.03249100  | 9.78838600  | 13.33257800 | H | 6.15814900  | 3.94357300  | 10.77227500 |
| C | 2.37875800  | 9.77440400  | 12.98211300 | C | 8.61839700  | 5.16620800  | 8.02023900  |
| C | 3.13114400  | 8.57871600  | 13.01156900 | H | 6.99361000  | 6.38725500  | 7.31188500  |
| C | 2.47280900  | 7.41514400  | 13.43049500 | C | 9.04887800  | 4.24269700  | 8.97615400  |
| C | 1.12099500  | 7.41110500  | 13.77727800 | H | 8.47875100  | 3.07599300  | 10.70790600 |
| C | 0.38713700  | 8.59895300  | 13.71326000 | H | 9.30806700  | 5.52501300  | 7.25143300  |
| C | 4.56658800  | 8.53234400  | 12.62710500 | H | 10.07873500 | 3.87644600  | 8.96368800  |
| C | 5.20371100  | 9.61914300  | 12.24963500 | C | 8.02088100  | 8.77115700  | 14.33974300 |
| C | 5.89831800  | 10.71456600 | 12.00246600 | H | 8.08919700  | 9.44464400  | 13.47051500 |

|    |             |             |             |                           |             |             |             |
|----|-------------|-------------|-------------|---------------------------|-------------|-------------|-------------|
| H  | 7.85640200  | 9.40731500  | 15.22610900 |                           |             |             |             |
| C  | 9.29681300  | 7.94325500  | 14.48910800 | <b>TS<sub>5a-6a</sub></b> |             |             |             |
| H  | 9.22767200  | 7.30170800  | 15.38757500 | Cu                        | 4.69315600  | 6.61019400  | 10.42807300 |
| H  | 9.38558700  | 7.24264300  | 13.64052100 | C                         | 1.39416600  | 3.89419900  | 8.83944200  |
| C  | 10.58000300 | 8.77705400  | 14.57653300 | C                         | 1.50748200  | 2.78681600  | 7.98254400  |
| H  | 10.50022300 | 9.47926900  | 15.42708200 | C                         | 2.64405500  | 2.71883300  | 7.19634100  |
| H  | 10.65562700 | 9.40892300  | 13.67261500 | C                         | 3.63053900  | 3.71287500  | 7.24501800  |
| C  | 11.84575300 | 7.93203000  | 14.72048100 | C                         | 3.54496400  | 4.82658800  | 8.06956400  |
| H  | 11.95966300 | 7.24348000  | 13.86615400 | C                         | 2.36944800  | 4.88881900  | 8.87136000  |
| H  | 12.75581300 | 8.55301000  | 14.77447600 | O                         | 1.30159700  | 5.43821000  | 11.24660700 |
| H  | 11.80866100 | 7.31289000  | 15.63313600 | P                         | 4.87983800  | 6.08947300  | 8.23067500  |
| C  | 4.92094700  | 8.27367400  | 15.73011600 | B                         | 5.95962300  | 10.68151500 | 9.54559200  |
| H  | 5.40607400  | 7.92932400  | 16.66169700 | S                         | 2.19708700  | 6.10745200  | 10.21709100 |
| H  | 3.96738800  | 7.73014500  | 15.64768000 | O                         | 4.61711700  | 3.39889300  | 6.36378100  |
| C  | 4.68409400  | 9.78096200  | 15.75404800 | O                         | 3.00033900  | 1.76441000  | 6.30025900  |
| H  | 4.57365900  | 10.17087100 | 14.72776400 | H                         | 0.75081500  | 2.00214000  | 7.95327600  |
| H  | 5.57353100  | 10.29471200 | 16.16600000 | H                         | 0.56577900  | 3.96549300  | 9.54555900  |
| C  | 3.44084700  | 10.21043000 | 16.54189800 | C                         | 1.11587300  | 7.47999900  | 9.48417000  |
| H  | 2.56872800  | 9.67396000  | 16.12914100 | C                         | 0.87945700  | 8.39075200  | 10.69278600 |
| H  | 3.53547300  | 9.88193200  | 17.59384400 | H                         | 0.36076600  | 7.85010700  | 11.49485700 |
| C  | 3.17885500  | 11.71475200 | 16.48346600 | H                         | 0.25983300  | 9.24704800  | 10.38249700 |
| H  | 3.03635300  | 12.04232300 | 15.43992600 | H                         | 1.82502000  | 8.77709300  | 11.10008300 |
| H  | 2.27566100  | 11.99998100 | 17.04891900 | C                         | -0.18553100 | 6.86962600  | 8.98424300  |
| H  | 4.02759600  | 12.28832900 | 16.89561200 | H                         | -0.02999200 | 6.25242400  | 8.08761300  |
| C  | 6.51385100  | 5.47604800  | 14.83627300 | H                         | -0.88766500 | 7.67889800  | 8.72493100  |
| H  | 6.87960400  | 5.60584200  | 15.87243000 | H                         | -0.64704400 | 6.25324800  | 9.76948600  |
| H  | 5.49635200  | 5.06120900  | 14.89971000 | C                         | 1.90646400  | 8.18217100  | 8.39293000  |
| C  | 7.41000300  | 4.53778400  | 14.03660000 | H                         | 2.85109300  | 8.59021800  | 8.77808200  |
| H  | 7.12144600  | 4.58668000  | 12.97810800 | H                         | 1.31498700  | 9.02747800  | 8.00389700  |
| H  | 8.45934200  | 4.88481400  | 14.07517100 | H                         | 2.11999400  | 7.51606500  | 7.54575000  |
| C  | 7.33263000  | 3.08435700  | 14.51354500 | C                         | 3.93585500  | 11.75153700 | 9.43179900  |
| H  | 6.27326700  | 2.77494800  | 14.50131200 | C                         | 5.02817600  | 12.69272700 | 10.07507300 |
| H  | 7.66631800  | 3.01638800  | 15.56679800 | O                         | 6.25893100  | 12.00017900 | 9.76029000  |
| C  | 8.14602700  | 2.12126800  | 13.64907700 | O                         | 4.60417600  | 10.46691300 | 9.42057300  |
| H  | 8.11246100  | 1.08733300  | 14.03286000 | C                         | 5.08930400  | 14.09702200 | 9.48907200  |
| H  | 7.75312800  | 2.10423100  | 12.61906000 | H                         | 4.13379900  | 14.62348400 | 9.63733500  |
| H  | 9.20643300  | 2.42439800  | 13.59388700 | H                         | 5.87856800  | 14.67234000 | 9.99492700  |
| Sn | 6.23879000  | 7.51261000  | 14.08118000 | H                         | 5.32016100  | 14.07958100 | 8.41631900  |
| O  | 6.95608900  | 6.84475100  | 12.07537500 | C                         | 4.93555800  | 12.75762200 | 11.60084700 |
| C  | 7.76223000  | 7.56159400  | 11.20495500 | H                         | 5.83800100  | 13.25085900 | 11.98969100 |
| H  | 8.63757200  | 8.02032200  | 11.71025200 | H                         | 4.05512500  | 13.32586900 | 11.93363700 |
| H  | 8.16724300  | 6.90451700  | 10.41019700 | H                         | 4.88600600  | 11.74973600 | 12.03352900 |
| H  | 7.23096800  | 8.39629900  | 10.69579500 | C                         | 2.64953700  | 11.63328900 | 10.23851900 |
| Br | 4.12183200  | 4.31542000  | 12.40393100 | H                         | 2.18719800  | 12.62240000 | 10.37901400 |

|   |             |             |             |   |             |             |             |
|---|-------------|-------------|-------------|---|-------------|-------------|-------------|
| H | 1.93250400  | 10.99687400 | 9.70257900  | C | 4.68256000  | 7.10127000  | 6.70857300  |
| H | 2.82923900  | 11.18166600 | 11.22217100 | C | 4.44280100  | 6.50496700  | 5.45730100  |
| C | 3.61829500  | 12.10233800 | 7.97683600  | C | 4.77983600  | 8.49619100  | 6.79370900  |
| H | 3.01910200  | 11.29183500 | 7.53743700  | C | 4.30982100  | 7.29587100  | 4.31520300  |
| H | 3.04532100  | 13.03781300 | 7.90078700  | H | 4.37801900  | 5.42079600  | 5.37124400  |
| H | 4.53824200  | 12.20885600 | 7.38351600  | C | 4.65170400  | 9.28395900  | 5.64616800  |
| H | 2.74828700  | 10.76259300 | 14.47649200 | H | 4.92123400  | 8.97773300  | 7.75896200  |
| H | 4.75594700  | 9.98752600  | 13.19980700 | C | 4.41691100  | 8.68774800  | 4.40589800  |
| H | 3.07550300  | 6.03967100  | 12.98756900 | H | 4.12413300  | 6.82178200  | 3.34830400  |
| H | 1.10332600  | 6.77885400  | 14.22437000 | H | 4.72673600  | 10.36983200 | 5.72966600  |
| O | 0.73777200  | 9.35045700  | 15.12427400 | H | 4.31342500  | 9.30508600  | 3.51023900  |
| C | -0.33037900 | 8.49692500  | 15.45708500 | C | 6.44991500  | 5.17786400  | 7.94963900  |
| H | -0.81338700 | 8.07199900  | 14.55814300 | C | 6.85164100  | 4.25203800  | 8.92744000  |
| H | -1.06382500 | 9.10645600  | 16.00210300 | C | 7.30368400  | 5.45695300  | 6.87292300  |
| H | -0.00436800 | 7.66293900  | 16.10479100 | C | 8.07917100  | 3.59946200  | 8.81144300  |
| C | 2.83610200  | 9.72876400  | 14.13600900 | H | 6.21579300  | 4.07754000  | 9.79726800  |
| C | 3.94550100  | 9.29115200  | 13.42496600 | C | 8.53911000  | 4.81076200  | 6.77106800  |
| C | 4.06356700  | 7.95460000  | 12.98666200 | H | 7.01113400  | 6.18115100  | 6.11232400  |
| C | 3.02369500  | 7.07577300  | 13.31946900 | C | 8.92873500  | 3.87992500  | 7.73675500  |
| C | 1.89530600  | 7.49965500  | 14.02605700 | H | 8.37653500  | 2.87994500  | 9.57541400  |
| C | 1.79284900  | 8.83423400  | 14.43882100 | H | 9.19948500  | 5.04016500  | 5.93123700  |
| C | 5.24084400  | 7.47956200  | 12.22208900 | H | 9.89419700  | 3.37520600  | 7.65496400  |
| C | 6.04124700  | 8.29063100  | 11.56164500 | C | 8.14598100  | 5.81621800  | 11.97232000 |
| C | 6.97586600  | 9.05996300  | 11.02262000 | H | 8.73438100  | 4.91261700  | 11.74719100 |
| C | 7.01138100  | 9.52284900  | 9.57340200  | H | 7.85409500  | 6.25917500  | 11.00783300 |
| H | 6.75275700  | 8.69036200  | 8.90245800  | C | 8.96392200  | 6.81514600  | 12.78892500 |
| H | 8.01871000  | 9.87820800  | 9.31180100  | H | 8.31968200  | 7.64585400  | 13.11969400 |
| H | 7.75162600  | 9.45575200  | 11.68960600 | H | 9.33088400  | 6.33925000  | 13.71743800 |
| C | 4.35957100  | 2.04762500  | 5.89849800  | C | 10.15395300 | 7.39469600  | 12.01784100 |
| C | 4.48180300  | 2.01964200  | 4.38689900  | H | 9.77874100  | 7.84113700  | 11.07983800 |
| C | 5.92954200  | 2.27751000  | 3.95220700  | H | 10.82554900 | 6.57135700  | 11.71367900 |
| C | 6.89508800  | 1.29326100  | 4.62215200  | C | 10.93719900 | 8.44062900  | 12.80925700 |
| C | 6.76248600  | 1.33989600  | 6.14768200  | H | 11.33781000 | 8.01721000  | 13.74579700 |
| C | 5.31915400  | 1.09086400  | 6.59489500  | H | 11.78727200 | 8.84043300  | 12.23310200 |
| H | 6.00289900  | 2.21212100  | 2.85514000  | H | 10.29215000 | 9.29176200  | 13.08612200 |
| H | 4.14703500  | 1.02577400  | 4.04769300  | C | 6.65130900  | 3.03723600  | 13.34169700 |
| H | 3.78736300  | 2.76381400  | 3.96757200  | H | 5.73683500  | 2.56094300  | 13.73536000 |
| H | 6.68290200  | 0.27012200  | 4.26085500  | H | 7.37052200  | 3.04648900  | 14.18130200 |
| H | 7.93166600  | 1.52178500  | 4.32677300  | C | 7.22022600  | 2.24377000  | 12.16891700 |
| H | 7.42941400  | 0.60244700  | 6.62117000  | H | 8.17196600  | 2.70255900  | 11.84512500 |
| H | 7.07927200  | 2.32765700  | 6.51156400  | H | 6.54737700  | 2.31854700  | 11.29644600 |
| H | 4.99827000  | 0.06598900  | 6.34534700  | C | 7.46907700  | 0.75756600  | 12.44736900 |
| H | 5.21001600  | 1.21647400  | 7.68385500  | H | 8.15133100  | 0.65752800  | 13.31069700 |
| H | 6.20809700  | 3.30773900  | 4.23124500  | H | 6.51916500  | 0.28662500  | 12.75904700 |

|                                                 |             |             |             |   |             |             |             |
|-------------------------------------------------|-------------|-------------|-------------|---|-------------|-------------|-------------|
| C                                               | 8.04348100  | 0.01216800  | 11.24259100 | H | 1.47747300  | 8.54984600  | 11.72763800 |
| H                                               | 9.01485900  | 0.43778600  | 10.93751600 | C | -0.01406500 | 6.75553100  | 9.14315100  |
| H                                               | 8.20200400  | -1.05754700 | 11.45420900 | H | 0.33420500  | 6.25259100  | 8.22875500  |
| H                                               | 7.36825300  | 0.08408400  | 10.37257100 | H | -0.69402500 | 7.57302400  | 8.84838100  |
| C                                               | 5.78605400  | 5.86410300  | 14.97329200 | H | -0.57630000 | 6.03188500  | 9.75209500  |
| H                                               | 4.68639200  | 5.83460600  | 15.01995500 | C | 2.10332100  | 8.15412900  | 9.11936200  |
| H                                               | 6.15519000  | 5.07894500  | 15.65356300 | H | 2.98908600  | 8.43954300  | 9.70300100  |
| C                                               | 6.29973500  | 7.24782300  | 15.37179200 | H | 1.60553100  | 9.08590000  | 8.80108100  |
| H                                               | 7.36548700  | 7.18255100  | 15.65635500 | H | 2.43411400  | 7.62595900  | 8.21541800  |
| H                                               | 6.26831700  | 7.93258300  | 14.50963900 | C | 8.82891200  | 11.13134400 | 12.46930800 |
| C                                               | 5.50149900  | 7.89135200  | 16.51021000 | C | 8.56995700  | 10.71399500 | 10.96441900 |
| H                                               | 5.54386400  | 7.24357700  | 17.40489100 | O | 7.21306500  | 11.17575400 | 10.73915100 |
| H                                               | 4.43999600  | 7.93241300  | 16.20941200 | O | 7.49176700  | 11.25139100 | 12.99478600 |
| C                                               | 5.98282600  | 9.29827000  | 16.85863500 | C | 9.48002800  | 11.38957900 | 9.94556800  |
| H                                               | 5.39086100  | 9.74339100  | 17.67461700 | H | 10.53212200 | 11.11641800 | 10.12189000 |
| H                                               | 7.04020100  | 9.29641800  | 17.17369300 | H | 9.20496700  | 11.05258900 | 8.93493000  |
| H                                               | 5.89940600  | 9.96571100  | 15.98464800 | H | 9.38918600  | 12.48335300 | 9.97618300  |
| Sn                                              | 6.28591800  | 5.19524000  | 12.93612300 | C | 8.58097700  | 9.19923400  | 10.76247100 |
| O                                               | 4.83675400  | 4.72281400  | 11.41874900 | H | 8.31206600  | 8.96919500  | 9.72384900  |
| C                                               | 4.09186500  | 3.53259200  | 11.32988500 | H | 9.57868900  | 8.77694000  | 10.94847600 |
| H                                               | 3.01512400  | 3.72887200  | 11.46312700 | H | 7.85935400  | 8.69589900  | 11.42367700 |
| H                                               | 4.22875300  | 3.05074700  | 10.34052400 | C | 9.57279800  | 10.08859500 | 13.29662800 |
| H                                               | 4.39490300  | 2.79800500  | 12.09359800 | H | 10.57775200 | 9.90452300  | 12.88603000 |
|                                                 |             |             |             | H | 9.68187900  | 10.44682600 | 14.33074300 |
|                                                 |             |             |             | H | 9.02147300  | 9.14133600  | 13.32564600 |
| <b>TS<sub>5<sup>b</sup>-6<sup>b</sup></sub></b> |             |             |             | C | 9.48926900  | 12.50336600 | 12.62163000 |
| Cu                                              | 5.02060500  | 6.59407300  | 11.70059600 | H | 9.46589200  | 12.79239700 | 13.68270000 |
| C                                               | 1.86078000  | 3.98278600  | 8.81449500  | H | 10.53783200 | 12.48897300 | 12.28857400 |
| C                                               | 2.20065400  | 3.19603900  | 7.70018400  | H | 8.94921500  | 13.27110400 | 12.04838900 |
| C                                               | 3.40733400  | 3.47603800  | 7.08732100  | H | 0.32831100  | 9.31281000  | 15.53803700 |
| C                                               | 4.25648400  | 4.47558300  | 7.57193700  | H | 2.53998900  | 9.73464600  | 14.45079800 |
| C                                               | 3.96698400  | 5.25477700  | 8.68623400  | H | 2.83030400  | 5.55575100  | 13.46886600 |
| C                                               | 2.69777800  | 4.99594200  | 9.27369600  | H | 0.64077000  | 5.14549400  | 14.45722000 |
| O                                               | 0.98461800  | 4.99260200  | 11.31665300 | O | -0.89646400 | 7.08371600  | 15.66616000 |
| P                                               | 5.20826900  | 6.40194400  | 9.43049100  | C | -1.50877900 | 5.82100200  | 15.64397800 |
| B                                               | 6.59354500  | 11.30534300 | 11.96161700 | H | -1.66244400 | 5.45222800  | 14.61280300 |
| S                                               | 2.09673700  | 5.87141900  | 10.76590800 | H | -2.48737600 | 5.93314200  | 16.13325800 |
| O                                               | 5.35840100  | 4.54614500  | 6.76992500  | H | -0.92016200 | 5.06299700  | 16.19433100 |
| O                                               | 3.96524900  | 2.88747500  | 5.98820200  | C | 0.89468300  | 8.49877100  | 15.07960200 |
| H                                               | 1.55121500  | 2.39832300  | 7.33661800  | C | 2.13017900  | 8.72214400  | 14.48188700 |
| H                                               | 0.94337200  | 3.80270900  | 9.37846900  | C | 2.86202700  | 7.67310000  | 13.88313100 |
| C                                               | 1.14332500  | 7.32129400  | 9.95200500  | C | 2.30091700  | 6.38825500  | 13.93338300 |
| C                                               | 0.64260200  | 8.10866200  | 11.16659800 | C | 1.04867900  | 6.15396100  | 14.50590300 |
| H                                               | 0.07404500  | 7.46247200  | 11.85040800 | C | 0.33624400  | 7.21035800  | 15.08379600 |
| H                                               | -0.01484100 | 8.92616500  | 10.82584700 |   |             |             |             |

|   |            |             |             |    |             |             |             |
|---|------------|-------------|-------------|----|-------------|-------------|-------------|
| C | 4.14020900 | 7.91764700  | 13.17792700 | H  | 10.36016800 | 3.93029700  | 8.81971200  |
| C | 4.29703300 | 8.98179800  | 12.42863400 | C  | 8.24595700  | 6.93195500  | 15.54954600 |
| C | 4.45337700 | 10.07718500 | 11.69590200 | H  | 8.69737500  | 6.01634200  | 15.13517000 |
| C | 5.04307900 | 11.39737100 | 12.18246800 | H  | 8.88147100  | 7.77400300  | 15.22630700 |
| H | 4.83062500 | 11.56046500 | 13.25073400 | C  | 8.20992000  | 6.84601900  | 17.07490200 |
| H | 4.60051900 | 12.23682800 | 11.61853600 | H  | 7.73879500  | 7.75079800  | 17.50039800 |
| H | 4.24400700 | 10.02505300 | 10.62281900 | H  | 7.56256300  | 6.00627300  | 17.38918700 |
| C | 5.27124400 | 3.47127200  | 5.81119500  | C  | 9.58556600  | 6.66676200  | 17.72907200 |
| C | 5.39621000 | 4.05823800  | 4.41255900  | H  | 10.23763500 | 7.50686700  | 17.42663100 |
| C | 6.78926800 | 4.65862500  | 4.19581100  | H  | 10.06098800 | 5.75663900  | 17.31996100 |
| C | 7.88663300 | 3.62587800  | 4.47823300  | C  | 9.53083100  | 6.57949300  | 19.25430300 |
| C | 7.74754200 | 3.04285400  | 5.88840700  | H  | 8.90906600  | 5.72846600  | 19.58066000 |
| C | 6.35607100 | 2.44587600  | 6.11868800  | H  | 10.53209800 | 6.45138900  | 19.69882300 |
| H | 6.87297700 | 5.04726000  | 3.16771000  | H  | 9.08667300  | 7.49158600  | 19.68840900 |
| H | 5.20556700 | 3.24541700  | 3.69202900  | C  | 5.61008900  | 8.96741600  | 15.84941900 |
| H | 4.60274500 | 4.81038800  | 4.28218800  | H  | 5.35294900  | 8.59425500  | 16.85726600 |
| H | 7.82346300 | 2.81281800  | 3.73035900  | H  | 4.68732200  | 9.36201400  | 15.40608000 |
| H | 8.88031300 | 4.08781400  | 4.35751200  | C  | 6.69128000  | 10.03938400 | 15.91152500 |
| H | 8.51778400 | 2.27696800  | 6.07232200  | H  | 7.01936600  | 10.29500000 | 14.89531800 |
| H | 7.91454200 | 3.83725000  | 6.62974100  | H  | 7.58612900  | 9.65189900  | 16.43101500 |
| H | 6.18391500 | 1.57374000  | 5.46541800  | C  | 6.24886000  | 11.33659400 | 16.59768200 |
| H | 6.23311800 | 2.11553700  | 7.16140700  | H  | 5.34178300  | 11.71434400 | 16.09148600 |
| H | 6.91218000 | 5.51798900  | 4.87577600  | H  | 5.94629400  | 11.12534100 | 17.64042300 |
| C | 5.28467600 | 7.80763100  | 8.23863000  | C  | 7.33145300  | 12.41619400 | 16.57075200 |
| C | 5.76951700 | 9.02020400  | 8.74462100  | H  | 7.60869000  | 12.65326400 | 15.53067000 |
| C | 4.91994600 | 7.73356500  | 6.88495100  | H  | 7.00213200  | 13.34931700 | 17.05804700 |
| C | 5.90628400 | 10.13989400 | 7.91916100  | H  | 8.24579200  | 12.07489700 | 17.08670100 |
| H | 6.03143800 | 9.09644900  | 9.79777800  | C  | 5.27037500  | 5.33783300  | 15.45197200 |
| C | 5.04211800 | 8.85475800  | 6.06127500  | H  | 4.99086100  | 5.54224200  | 16.50116600 |
| H | 4.54815100 | 6.79824000  | 6.46940200  | H  | 4.34529500  | 5.17120100  | 14.89089100 |
| C | 5.53858600 | 10.05919800 | 6.57411400  | C  | 6.17905900  | 4.11498000  | 15.34618500 |
| H | 6.29210100 | 11.06410600 | 8.35358300  | H  | 6.53477000  | 4.01711900  | 14.30807300 |
| H | 4.75015600 | 8.78627800  | 5.00968000  | H  | 7.07601400  | 4.23750700  | 15.98085500 |
| H | 5.63290400 | 10.93331200 | 5.92403500  | C  | 5.47015900  | 2.80949900  | 15.71738800 |
| C | 6.81905400 | 5.56505300  | 9.07650000  | H  | 4.58119300  | 2.71028500  | 15.07182700 |
| C | 7.04688300 | 4.27496400  | 9.58482800  | H  | 5.10013900  | 2.87112600  | 16.75839200 |
| C | 7.87524900 | 6.24453800  | 8.45072900  | C  | 6.35942500  | 1.57844400  | 15.54869100 |
| C | 8.31098000 | 3.69278300  | 9.48394600  | H  | 5.83371600  | 0.64790600  | 15.82183900 |
| H | 6.24233800 | 3.75163000  | 10.10684500 | H  | 6.68697600  | 1.48209100  | 14.50015400 |
| C | 9.14224700 | 5.66052700  | 8.36136800  | H  | 7.26665700  | 1.64651800  | 16.17472200 |
| H | 7.71486900 | 7.23940400  | 8.03509900  | Sn | 6.19028700  | 7.16962900  | 14.70355200 |
| C | 9.36816200 | 4.38494200  | 8.88437200  | O  | 6.91316400  | 7.06162200  | 12.69747100 |
| H | 8.47288100 | 2.69408900  | 9.89786800  | C  | 8.01216800  | 6.23816300  | 12.39354400 |
| H | 9.95583800 | 6.21048400  | 7.88069800  | H  | 8.92682400  | 6.53306100  | 12.94185600 |

|                           |            |             |             |   |             |             |             |
|---------------------------|------------|-------------|-------------|---|-------------|-------------|-------------|
| H                         | 7.80993700 | 5.17142200  | 12.60538200 | H | 4.82011200  | 12.34182500 | 11.69833000 |
| H                         | 8.23758500 | 6.31307600  | 11.31637800 | C | 6.40656800  | 14.76362900 | 11.22067700 |
| Br                        | 4.66850700 | 4.10044000  | 12.10552500 | H | 5.84819200  | 15.59957100 | 11.66990200 |
|                           |            |             |             | H | 7.19267200  | 15.18400300 | 10.57585800 |
| <b>TS<sub>5b-6b</sub></b> |            |             |             | H | 5.72389600  | 14.18349300 | 10.58707100 |
| Cu                        | 4.81817900 | 6.85272200  | 11.40196300 | C | 8.15443300  | 14.66194700 | 13.01393500 |
| C                         | 1.49869200 | 5.70840900  | 8.50795100  | H | 8.94219800  | 14.90443100 | 12.28576600 |
| C                         | 1.48119500 | 4.87252800  | 7.37512700  | H | 7.78441000  | 15.60025700 | 13.45283400 |
| C                         | 2.70187000 | 4.57035900  | 6.79760700  | H | 8.60379600  | 14.05536500 | 13.81353600 |
| C                         | 3.90340400 | 5.07132200  | 7.31896500  | H | 3.37274700  | 11.25335500 | 15.88272300 |
| C                         | 3.96152600 | 5.86450700  | 8.45569500  | H | 5.19773400  | 10.38258000 | 14.41823400 |
| C                         | 2.69748900 | 6.19854100  | 9.01784700  | H | 2.84536100  | 6.87409500  | 13.61230200 |
| O                         | 1.26643000 | 6.83597800  | 11.19142600 | H | 1.02743300  | 7.74022700  | 15.00839400 |
| P                         | 5.52696200 | 6.21396100  | 9.36053500  | O | 1.14054600  | 10.13465900 | 16.34883700 |
| B                         | 7.48007600 | 11.66662200 | 12.50323900 | C | -0.06620500 | 9.44505400  | 16.56327900 |
| S                         | 2.59477300 | 7.17827600  | 10.54802900 | H | -0.62197500 | 9.28252300  | 15.62147600 |
| O                         | 4.93696100 | 4.63379900  | 6.55548200  | H | -0.67352900 | 10.07054100 | 17.23165500 |
| O                         | 2.97020200 | 3.78488900  | 5.72350800  | H | 0.09950900  | 8.46353200  | 17.04414100 |
| H                         | 0.55112000 | 4.46442600  | 6.97781200  | C | 3.27228200  | 10.29356700 | 15.37078600 |
| H                         | 0.57628700 | 5.95419400  | 9.03719700  | C | 4.28753000  | 9.79940600  | 14.56085500 |
| C                         | 2.41363900 | 8.95441500  | 9.88714800  | C | 4.16046500  | 8.55569200  | 13.90586400 |
| C                         | 2.38622700 | 9.80160400  | 11.16220200 | C | 2.97570700  | 7.83293100  | 14.11006400 |
| H                         | 1.59837500 | 9.46302000  | 11.84944800 | C | 1.93829000  | 8.32911000  | 14.90491800 |
| H                         | 2.18730500 | 10.85054100 | 10.89011000 | C | 2.08246900  | 9.56657200  | 15.54712000 |
| H                         | 3.34666000 | 9.76061900  | 11.69247000 | C | 5.24896200  | 8.02229000  | 13.06212100 |
| C                         | 1.09679500 | 9.03670900  | 9.12841100  | C | 5.96942500  | 8.75756200  | 12.24387100 |
| H                         | 1.13156800 | 8.47289000  | 8.18477000  | C | 6.83398900  | 9.49497600  | 11.55786700 |
| H                         | 0.88295300 | 10.09080400 | 8.88865000  | C | 8.00604300  | 10.22100600 | 12.20800200 |
| H                         | 0.27494700 | 8.64740900  | 9.74694500  | H | 8.87659200  | 10.23070900 | 11.53228900 |
| C                         | 3.62548600 | 9.28400200  | 9.02699000  | H | 8.29193800  | 9.71088500  | 13.14099000 |
| H                         | 4.56417000 | 9.12022600  | 9.57552000  | H | 6.68208600  | 9.66673300  | 10.48752800 |
| H                         | 3.58796600 | 10.34936700 | 8.74762300  | C | 4.41395800  | 3.59662500  | 5.69975600  |
| H                         | 3.64895500 | 8.69538400  | 8.09994300  | C | 4.75865100  | 2.23245800  | 6.28559900  |
| C                         | 7.03929100 | 13.89532800 | 12.29980100 | C | 4.28154700  | 1.10119700  | 5.37027700  |
| C                         | 6.02031000 | 13.22334400 | 13.29612600 | C | 4.82306500  | 1.27555200  | 3.94671400  |
| O                         | 6.67673600 | 11.96397100 | 13.57958200 | C | 4.44956000  | 2.64740700  | 3.37308100  |
| O                         | 7.65046200 | 12.74186700 | 11.67087900 | C | 4.92399900  | 3.78471300  | 4.28504100  |
| C                         | 5.80163600 | 13.96890400 | 14.60473700 | H | 4.59019100  | 0.13008000  | 5.78806100  |
| H                         | 5.38590000 | 14.97131500 | 14.41847500 | H | 5.85235100  | 2.20075600  | 6.41402600  |
| H                         | 5.08602600 | 13.41309100 | 15.22867900 | H | 4.31988700  | 2.15972600  | 7.29311400  |
| H                         | 6.73484800 | 14.07228500 | 15.17273600 | H | 5.92364300  | 1.17286400  | 3.95990200  |
| C                         | 4.67654500 | 12.89728500 | 12.63665900 | H | 4.44169400  | 0.47521800  | 3.29254400  |
| H                         | 4.08395300 | 12.26320400 | 13.30935300 | H | 4.87715500  | 2.77838000  | 2.36661400  |
| H                         | 4.10235200 | 13.81064800 | 12.42308300 | H | 3.35393900  | 2.71399100  | 3.26452300  |



|   |             |            |             |                             |            |             |             |
|---|-------------|------------|-------------|-----------------------------|------------|-------------|-------------|
| H | 6.02478200  | 3.80562900 | 4.33771600  | C                           | 6.24832700 | 1.15225400  | 14.48221700 |
| H | 4.58878500  | 4.76792600 | 3.92175600  | H                           | 7.08564400 | 1.05770500  | 15.19707200 |
| H | 3.17883900  | 1.10162100 | 5.34560200  | H                           | 5.32701700 | 1.06532100  | 15.08644200 |
| C | 6.52243700  | 7.30481200 | 8.28642500  | C                           | 6.30697600 | 0.01149300  | 13.46634100 |
| C | 7.72572100  | 7.79240500 | 8.82548100  | H                           | 7.23109900 | 0.06116700  | 12.86565600 |
| C | 6.14208800  | 7.68982300 | 6.99366300  | H                           | 6.27929500 | -0.97700900 | 13.95241900 |
| C | 8.53774200  | 8.64506000 | 8.07701600  | H                           | 5.45550000 | 0.05950900  | 12.76581600 |
| H | 8.01978600  | 7.51346600 | 9.83896700  | C                           | 6.20284000 | 6.91328100  | 15.88763500 |
| C | 6.95195100  | 8.55405300 | 6.25183500  | H                           | 5.15730100 | 7.19635900  | 16.08317200 |
| H | 5.21570500  | 7.31122900 | 6.56057200  | H                           | 6.51222800 | 6.21792600  | 16.68592500 |
| C | 8.14975300  | 9.03197500 | 6.79026100  | C                           | 7.09882300 | 8.14849600  | 15.83057800 |
| H | 9.46935600  | 9.01895100 | 8.50755700  | H                           | 8.16129100 | 7.84235700  | 15.79759800 |
| H | 6.64554000  | 8.85248100 | 5.24637100  | H                           | 6.92137100 | 8.69331500  | 14.88961200 |
| H | 8.78041100  | 9.70828100 | 6.20846600  | C                           | 6.89474700 | 9.12937500  | 16.99030400 |
| C | 6.39486900  | 4.59810200 | 9.27186700  | H                           | 7.13975200 | 8.63056300  | 17.94570200 |
| C | 6.00709400  | 3.61470700 | 10.19538200 | H                           | 5.82259600 | 9.38648300  | 17.04491700 |
| C | 7.39947200  | 4.31532400 | 8.33584400  | C                           | 7.71835700 | 10.40825700 | 16.83568200 |
| C | 6.58989600  | 2.34596100 | 10.15142800 | H                           | 7.56213800 | 11.09836600 | 17.68100700 |
| H | 5.28386100  | 3.86679600 | 10.97241200 | H                           | 8.79798100 | 10.18447800 | 16.78592100 |
| C | 7.99467200  | 3.05276600 | 8.31117100  | H                           | 7.44766700 | 10.94192900 | 15.90967700 |
| H | 7.70782400  | 5.07793700 | 7.61993500  | Sn                          | 6.21327400 | 5.75981200  | 14.00892200 |
| C | 7.58231100  | 2.06242600 | 9.20911100  | O                           | 4.61315700 | 5.21766400  | 12.65458800 |
| H | 6.28785600  | 1.58803500 | 10.87583900 | C                           | 3.49650700 | 4.39582300  | 12.85742400 |
| H | 8.78315900  | 2.84023100 | 7.58509700  | H                           | 2.55226900 | 4.96208700  | 12.75068100 |
| H | 8.04805900  | 1.07425800 | 9.18587200  | H                           | 3.46391300 | 3.57391700  | 12.11156900 |
| C | 7.95806800  | 6.05500000 | 12.72036000 | H                           | 3.50135800 | 3.92486700  | 13.85721800 |
| H | 7.55091100  | 6.55036700 | 11.82677400 |                             |            |             |             |
| H | 8.58761000  | 6.81014800 | 13.22108400 | <b>TS<sub>8'a-9'a</sub></b> |            |             |             |
| C | 8.76754700  | 4.82267100 | 12.33042600 | Cu                          | 4.38746000 | 6.73225600  | 10.95554600 |
| H | 9.20275300  | 4.34771300 | 13.22884800 | C                           | 1.47053800 | 3.18164000  | 8.64431000  |
| H | 8.10452200  | 4.06617000 | 11.88231600 | C                           | 2.02589000 | 2.12499300  | 7.90753800  |
| C | 9.88795500  | 5.12594500 | 11.32924400 | C                           | 3.27630100 | 2.34347800  | 7.36299300  |
| H | 10.55483900 | 5.90059300 | 11.74976800 | C                           | 3.96502400 | 3.54340700  | 7.56681000  |
| H | 9.43881700  | 5.57004300 | 10.42287200 | C                           | 3.45410000 | 4.60840200  | 8.30708700  |
| C | 10.69988100 | 3.89205900 | 10.93957900 | C                           | 2.14140500 | 4.39093600  | 8.81092600  |
| H | 10.05075100 | 3.12390000 | 10.48959600 | O                           | 0.09470600 | 4.77965900  | 10.45161500 |
| H | 11.48846500 | 4.13461800 | 10.20886700 | P                           | 4.48144900 | 6.09145500  | 8.74552800  |
| H | 11.18766700 | 3.44098100 | 11.82006800 | B                           | 3.96886000 | 10.70425000 | 10.30641000 |
| C | 6.22743500  | 3.69922700 | 14.82419600 | S                           | 1.20813100 | 5.60669000  | 9.82259600  |
| H | 5.33824400  | 3.60449800 | 15.47313400 | O                           | 5.16190400 | 3.47381400  | 6.90916800  |
| H | 7.09728900  | 3.67862300 | 15.50604700 | O                           | 4.02139200 | 1.50091800  | 6.59054700  |
| C | 6.29378700  | 2.54028800 | 13.83388600 | H                           | 1.50501800 | 1.17609500  | 7.77167000  |
| H | 7.21282000  | 2.61637700 | 13.22947800 | H                           | 0.50138400 | 3.08459600  | 9.13738800  |
| H | 5.46327200  | 2.61517800 | 13.11253800 | C                           | 0.27794400 | 6.55909200  | 8.43840200  |

|   |             |             |             |   |             |             |             |
|---|-------------|-------------|-------------|---|-------------|-------------|-------------|
| C | -0.67471600 | 7.45297000  | 9.23453700  | C | 0.13944700  | 6.66720400  | 12.78503700 |
| H | -1.31916100 | 6.85741000  | 9.89572400  | C | -1.13415300 | 6.19074700  | 13.09352600 |
| H | -1.30943400 | 8.02344300  | 8.53553800  | C | -2.22453100 | 7.06867700  | 13.11589900 |
| H | -0.11933900 | 8.16737000  | 9.85472900  | C | 1.66836900  | 8.48024900  | 12.14750000 |
| C | -0.49555900 | 5.57769100  | 7.57096300  | C | 2.86277900  | 8.66730600  | 11.93064500 |
| H | 0.16947500  | 4.98501300  | 6.92646900  | C | 4.27034600  | 8.89933100  | 11.97169200 |
| H | -1.19823000 | 6.13117100  | 6.92437300  | C | 4.98602900  | 9.63052000  | 10.79446900 |
| H | -1.07706400 | 4.89308800  | 8.20669500  | H | 5.29974100  | 8.93823200  | 10.00169700 |
| C | 1.28017700  | 7.38995700  | 7.65659300  | H | 5.90713700  | 10.08354700 | 11.18773700 |
| H | 1.88840400  | 8.01964800  | 8.32245900  | H | 4.46755100  | 9.48638200  | 12.88237500 |
| H | 0.74452200  | 8.06316200  | 6.96477300  | C | 5.28850900  | 2.14440600  | 6.36019800  |
| H | 1.94724300  | 6.76462700  | 7.04964200  | C | 5.55058800  | 2.26002800  | 4.86502400  |
| C | 2.14142400  | 11.58416200 | 9.22609600  | C | 6.91897900  | 2.89426400  | 4.59480200  |
| C | 2.50902500  | 12.44888000 | 10.50267800 | C | 8.03546300  | 2.11960500  | 5.30415000  |
| O | 3.81956800  | 11.95834600 | 10.85200200 | C | 7.76358200  | 2.01768300  | 6.80825600  |
| O | 3.00007500  | 10.43834200 | 9.36376200  | C | 6.39414900  | 1.39805500  | 7.09694900  |
| C | 2.60185200  | 13.94976900 | 10.24956500 | H | 7.10173000  | 2.93942900  | 3.50865700  |
| H | 1.63274200  | 14.35143100 | 9.91407200  | H | 5.50442800  | 1.24305300  | 4.44102600  |
| H | 2.87923500  | 14.46026700 | 11.18392600 | H | 4.73190400  | 2.84349100  | 4.41573900  |
| H | 3.36340900  | 14.18894800 | 9.49579700  | H | 8.11096200  | 1.10599400  | 4.86679400  |
| C | 1.59861800  | 12.17176200 | 11.70278200 | H | 9.00654800  | 2.61128200  | 5.12935900  |
| H | 2.02635700  | 12.66485700 | 12.58829100 | H | 8.55107600  | 1.43249100  | 7.30936300  |
| H | 0.58215000  | 12.56265400 | 11.54329300 | H | 7.79337100  | 3.02254200  | 7.25123100  |
| H | 1.54499000  | 11.09412600 | 11.91297700 | H | 6.35555800  | 0.34622100  | 6.76633600  |
| C | 0.69600800  | 11.09998700 | 9.18514100  | H | 6.16694600  | 1.42052800  | 8.17372000  |
| H | -0.00506400 | 11.94912900 | 9.16085700  | H | 6.90838300  | 3.93396000  | 4.96267000  |
| H | 0.53636900  | 10.49319700 | 8.28184100  | C | 4.51381300  | 7.06029300  | 7.16787700  |
| H | 0.46841900  | 10.46986500 | 10.05263700 | C | 4.41859100  | 8.45475700  | 7.25029000  |
| C | 2.50910700  | 12.25919400 | 7.90181400  | C | 4.62210500  | 6.46042100  | 5.90075700  |
| H | 2.38666300  | 11.52752200 | 7.08966900  | C | 4.43815400  | 9.24013400  | 6.09367600  |
| H | 1.86445600  | 13.12515800 | 7.68906700  | H | 4.28789500  | 8.93553600  | 8.21657800  |
| H | 3.55714300  | 12.59306800 | 7.90476700  | C | 4.63505400  | 7.24483400  | 4.74614700  |
| H | -2.88457800 | 9.10147000  | 12.87171700 | H | 4.71345400  | 5.37832400  | 5.81885000  |
| H | -0.60001100 | 9.95815000  | 12.31610500 | C | 4.54476500  | 8.63847200  | 4.83851700  |
| H | 0.97810100  | 5.97070900  | 12.74095400 | H | 4.35510000  | 10.32564100 | 6.18372200  |
| H | -1.25725200 | 5.12382400  | 13.27247900 | H | 4.71827100  | 6.76434600  | 3.76741100  |
| O | -3.50874200 | 6.69352400  | 13.39129800 | H | 4.55349200  | 9.25061200  | 3.93264200  |
| C | -3.76800900 | 5.33202300  | 13.62209600 | C | 6.19358500  | 5.39881300  | 8.78022300  |
| H | -3.48960100 | 4.70551700  | 12.75498000 | C | 6.50294600  | 4.46146800  | 9.77931600  |
| H | -4.84953300 | 5.24079800  | 13.79777900 | C | 7.22060300  | 5.89308500  | 7.96378000  |
| H | -3.22906800 | 4.95169400  | 14.50973400 | C | 7.81729100  | 4.02773500  | 9.94884200  |
| C | -2.02247200 | 8.43178100  | 12.84075900 | H | 5.71566500  | 4.10240200  | 10.44704000 |
| C | -0.75156000 | 8.89863800  | 12.53159900 | C | 8.53835300  | 5.46141100  | 8.14333100  |
| C | 0.35904200  | 8.02433700  | 12.48266500 | H | 6.99905500  | 6.62865000  | 7.19015600  |

|    |             |             |             |                           |             |             |             |
|----|-------------|-------------|-------------|---------------------------|-------------|-------------|-------------|
| C  | 8.84116800  | 4.53258000  | 9.14098100  | O                         | 6.39670600  | 6.75029200  | 11.69581800 |
| H  | 8.04709600  | 3.31507500  | 10.74163400 | C                         | 7.53466100  | 7.39205700  | 11.22530200 |
| H  | 9.33000600  | 5.86343400  | 7.50532500  | H                         | 7.62883000  | 8.44236700  | 11.56907200 |
| H  | 9.87193700  | 4.20089000  | 9.29053300  | H                         | 8.46520700  | 6.86811100  | 11.53652000 |
| C  | 6.86708500  | 8.88808800  | 14.23576600 | H                         | 7.54090000  | 7.42205400  | 10.11965400 |
| H  | 6.92848600  | 9.60680200  | 13.40182400 | Br                        | 3.55458900  | 4.71754600  | 12.11123300 |
| H  | 6.36235900  | 9.41730700  | 15.06318200 |                           |             |             |             |
| C  | 8.26567700  | 8.44127100  | 14.65734700 | <b>TS<sub>8a-9a</sub></b> |             |             |             |
| H  | 8.19691600  | 7.74453500  | 15.51256600 | Cu                        | 4.52924600  | 7.49618600  | 10.56088200 |
| H  | 8.73472600  | 7.85677800  | 13.84554700 | C                         | 2.96487200  | 3.33440100  | 9.96059700  |
| C  | 9.20473100  | 9.59253200  | 15.03576600 | C                         | 3.58840300  | 2.21237800  | 9.38652000  |
| H  | 8.74500600  | 10.18034100 | 15.85161500 | C                         | 4.59177400  | 2.45438600  | 8.46620500  |
| H  | 9.28559000  | 10.28506200 | 14.17794500 | C                         | 4.98441600  | 3.75810000  | 8.13497600  |
| C  | 10.59957400 | 9.12891500  | 15.45583400 | C                         | 4.41415600  | 4.88917800  | 8.70481900  |
| H  | 11.09028000 | 8.56433600  | 14.64483100 | C                         | 3.35174300  | 4.62559400  | 9.61726600  |
| H  | 11.25599200 | 9.97532200  | 15.71884100 | O                         | 1.74643100  | 5.31456700  | 11.63708800 |
| H  | 10.54903700 | 8.46020200  | 16.33209300 | P                         | 5.13021000  | 6.57818600  | 8.54194100  |
| C  | 3.66273300  | 7.35352300  | 14.81461000 | B                         | 3.26501300  | 10.74545400 | 10.02876000 |
| H  | 3.86670900  | 6.69763500  | 15.67946800 | S                         | 2.46450800  | 5.97065900  | 10.46862900 |
| H  | 2.90278100  | 6.84811700  | 14.20348200 | O                         | 5.98514300  | 3.70372400  | 7.22169700  |
| C  | 3.17626300  | 8.72349200  | 15.27285100 | O                         | 5.35490200  | 1.56074400  | 7.78787500  |
| H  | 3.09589300  | 9.40704200  | 14.41257100 | H                         | 3.30993300  | 1.19554400  | 9.66452300  |
| H  | 3.90738900  | 9.18570800  | 15.96392400 | H                         | 2.18183900  | 3.21974100  | 10.71192700 |
| C  | 1.80061900  | 8.68103900  | 15.95165700 | C                         | 1.07465300  | 6.31903400  | 9.18659200  |
| H  | 1.09643100  | 8.16398500  | 15.27858200 | C                         | 0.17011100  | 7.32557500  | 9.89053500  |
| H  | 1.85982000  | 8.06287500  | 16.86680800 | H                         | -0.26679200 | 6.90294000  | 10.80230900 |
| C  | 1.25092100  | 10.06612800 | 16.28989500 | H                         | -0.65139000 | 7.59539900  | 9.20776700  |
| H  | 1.13721100  | 10.67230200 | 15.37518500 | H                         | 0.71871700  | 8.23723500  | 10.15768400 |
| H  | 0.26255500  | 10.00996800 | 16.77601400 | C                         | 0.33823700  | 5.01248200  | 8.92498000  |
| H  | 1.92797800  | 10.61593100 | 16.96720200 | H                         | 0.93735900  | 4.30813900  | 8.33145500  |
| C  | 6.36142500  | 5.39458000  | 14.51801400 | H                         | -0.58402600 | 5.23430300  | 8.36350700  |
| H  | 6.93089800  | 5.70767800  | 15.41392700 | H                         | 0.05298000  | 4.53337900  | 9.87301400  |
| H  | 5.47996000  | 4.83742400  | 14.87510700 | C                         | 1.69476800  | 6.91473800  | 7.93473500  |
| C  | 7.20684800  | 4.50630800  | 13.61578100 | H                         | 2.25316000  | 7.83326800  | 8.15872000  |
| H  | 6.59537800  | 4.20892900  | 12.75008100 | H                         | 0.88521700  | 7.18327000  | 7.23587600  |
| H  | 8.05539700  | 5.07519000  | 13.19504800 | H                         | 2.34762700  | 6.20266300  | 7.41441900  |
| C  | 7.74319100  | 3.25366500  | 14.31862400 | C                         | 1.68159200  | 11.20303400 | 8.44086400  |
| H  | 6.89434900  | 2.69898200  | 14.75839900 | C                         | 1.57881900  | 12.23009400 | 9.63505900  |
| H  | 8.37756500  | 3.55695400  | 15.17300300 | O                         | 2.81497500  | 11.99428100 | 10.34909700 |
| C  | 8.53555700  | 2.32266400  | 13.40010700 | O                         | 2.56484000  | 10.18618800 | 8.98263700  |
| H  | 8.94136200  | 1.45072600  | 13.94082400 | C                         | 1.53011400  | 13.69377100 | 9.21606700  |
| H  | 7.89968700  | 1.93890000  | 12.58452700 | H                         | 0.64426200  | 13.89232200 | 8.59311000  |
| H  | 9.38480000  | 2.85115900  | 12.93358700 | H                         | 1.46685500  | 14.32885200 | 10.11180100 |
| Sn | 5.53151800  | 7.23789600  | 13.62472700 | H                         | 2.42843000  | 13.98713000 | 8.65789000  |

|   |             |             |             |   |             |             |             |
|---|-------------|-------------|-------------|---|-------------|-------------|-------------|
| C | 0.43483900  | 11.91553900 | 10.60002800 | H | 9.48966600  | 3.04414800  | 4.78890500  |
| H | 0.55949500  | 12.52967600 | 11.50360800 | H | 9.79313400  | 2.62123100  | 7.25595600  |
| H | -0.54518700 | 12.14298800 | 10.15572600 | H | 8.63232100  | 3.91454200  | 6.95603800  |
| H | 0.45510600  | 10.86313200 | 10.91005400 | H | 7.92076900  | 0.99719500  | 7.63682900  |
| C | 0.36081800  | 10.56177600 | 8.03872900  | H | 7.71839600  | 2.41314000  | 8.69315000  |
| H | -0.34273100 | 11.32755000 | 7.67754200  | H | 7.12074300  | 3.79267800  | 4.80544900  |
| H | 0.53036700  | 9.84146700  | 7.22498400  | C | 4.77382500  | 7.16182400  | 6.84020100  |
| H | -0.10219400 | 10.02699500 | 8.87470000  | C | 4.55430400  | 8.53435600  | 6.65515100  |
| C | 2.37633900  | 11.78005100 | 7.20611600  | C | 4.77848700  | 6.30642100  | 5.72621300  |
| H | 2.55507500  | 10.96615700 | 6.49036900  | C | 4.36286800  | 9.04737900  | 5.36864100  |
| H | 1.75704700  | 12.54235500 | 6.71198300  | H | 4.50896400  | 9.20029600  | 7.51889900  |
| H | 3.34508000  | 12.23133900 | 7.46610000  | C | 4.56506000  | 6.82064000  | 4.44635700  |
| H | -2.67316200 | 10.28839000 | 14.32543400 | H | 4.96829500  | 5.24160900  | 5.85784700  |
| H | -0.44826100 | 10.78233900 | 13.29617700 | C | 4.36371500  | 8.19284100  | 4.26388700  |
| H | 0.36808600  | 6.55942800  | 13.06159900 | H | 4.20729600  | 10.11932900 | 5.23120600  |
| H | -1.81677100 | 6.06646300  | 14.10512700 | H | 4.56578200  | 6.14755700  | 3.58548300  |
| O | -3.61393700 | 7.99481800  | 14.85039700 | H | 4.20681800  | 8.59507900  | 3.26017000  |
| C | -4.06004200 | 6.69196700  | 15.14323700 | C | 6.93967200  | 6.26299000  | 8.47177500  |
| H | -4.15348300 | 6.07409900  | 14.23163300 | C | 7.53949300  | 5.50691900  | 9.49126100  |
| H | -5.05055600 | 6.79525500  | 15.60624700 | C | 7.74861600  | 6.86032200  | 7.49448400  |
| H | -3.38546100 | 6.17589200  | 15.85003800 | C | 8.92389100  | 5.34919800  | 9.52653000  |
| C | -1.99412600 | 9.48357100  | 14.03781400 | H | 6.92939700  | 5.06784600  | 10.27514800 |
| C | -0.75993000 | 9.74981900  | 13.46089500 | C | 9.13777400  | 6.70606700  | 7.53932000  |
| C | 0.11641000  | 8.70262100  | 13.09788900 | H | 7.29948900  | 7.45066600  | 6.69483200  |
| C | -0.29813000 | 7.37820700  | 13.34263900 | C | 9.72966700  | 5.95318400  | 8.55575900  |
| C | -1.53530900 | 7.10408400  | 13.92717200 | H | 9.37541300  | 4.76105200  | 10.32900900 |
| C | -2.39368400 | 8.15766000  | 14.27855200 | H | 9.75753600  | 7.17885500  | 6.77359000  |
| C | 1.41383500  | 8.96029200  | 12.56392200 | H | 10.81524200 | 5.83491600  | 8.59080700  |
| C | 2.57228100  | 9.10997500  | 12.20547900 | C | 6.76215700  | 7.83533900  | 14.56716200 |
| C | 3.98708600  | 9.21006900  | 11.99787600 | H | 7.15677600  | 8.78138600  | 14.16291000 |
| C | 4.46618000  | 10.04212600 | 10.75086200 | H | 6.44342400  | 8.03979200  | 15.60287500 |
| H | 5.04233800  | 9.46155300  | 10.00190600 | C | 7.83196100  | 6.74286300  | 14.52117900 |
| H | 5.17396000  | 10.80976200 | 11.10003800 | H | 7.44793900  | 5.82332500  | 15.00082100 |
| H | 4.40999300  | 9.71321600  | 12.88235600 | H | 8.02934800  | 6.46389800  | 13.47179500 |
| C | 6.34842300  | 2.30711300  | 7.04895300  | C | 9.15556000  | 7.13147100  | 15.18740700 |
| C | 6.27013200  | 1.96148000  | 5.57180400  | H | 8.96764600  | 7.40369000  | 16.24185900 |
| C | 7.34224700  | 2.71242300  | 4.77367600  | H | 9.54148800  | 8.04786800  | 14.70473000 |
| C | 8.74021400  | 2.46469900  | 5.35153800  | C | 10.21138800 | 6.02893300  | 15.11660000 |
| C | 8.79687500  | 2.83297100  | 6.83764600  | H | 10.43520300 | 5.76284900  | 14.06952800 |
| C | 7.73109300  | 2.08326700  | 7.64360100  | H | 11.15710400 | 6.33265800  | 15.59387500 |
| H | 7.29625500  | 2.40835800  | 3.71597600  | H | 9.86318100  | 5.11095000  | 15.61957400 |
| H | 6.41267700  | 0.87219900  | 5.48183800  | C | 3.33194300  | 7.60452500  | 14.85903200 |
| H | 5.25472600  | 2.19206000  | 5.21378100  | H | 3.58403600  | 6.86288900  | 15.64066500 |
| H | 9.00474900  | 1.39903300  | 5.22259800  | H | 2.40222300  | 7.25837700  | 14.38689000 |

|                             |            |             |             |   |             |             |             |
|-----------------------------|------------|-------------|-------------|---|-------------|-------------|-------------|
| C                           | 3.15370600 | 8.98548600  | 15.47904500 | H | 1.46401100  | 1.93676000  | 7.25568100  |
| H                           | 3.01201000 | 9.74103100  | 14.68871900 | H | 0.64111500  | 3.50508000  | 9.09247500  |
| H                           | 4.06950900 | 9.28076900  | 16.02522500 | C | 0.53287400  | 7.02318600  | 9.06952900  |
| C                           | 1.95193800 | 9.07323600  | 16.42902000 | C | -0.24954000 | 7.88740000  | 10.06283200 |
| H                           | 1.05144900 | 8.73643300  | 15.88723500 | H | -0.96264900 | 7.27884000  | 10.63975900 |
| H                           | 2.09194600 | 8.35901500  | 17.26108800 | H | -0.81182200 | 8.66416300  | 9.51089900  |
| C                           | 1.71712400 | 10.47794400 | 16.98146900 | H | 0.42209800  | 8.38609200  | 10.78031400 |
| H                           | 1.52693200 | 11.19400600 | 16.16412500 | C | -0.41861500 | 6.21631600  | 8.19678100  |
| H                           | 0.85011000 | 10.51155500 | 17.66110900 | H | 0.11336200  | 5.66762300  | 7.40205400  |
| H                           | 2.59540800 | 10.84332400 | 17.54074900 | H | -1.14667100 | 6.89848100  | 7.71693800  |
| C                           | 4.73216700 | 5.07721200  | 13.30090900 | H | -0.97642300 | 5.49419500  | 8.81671600  |
| H                           | 4.86286300 | 4.77812300  | 14.35747100 | C | 1.51281400  | 7.85608300  | 8.26017300  |
| H                           | 3.67586600 | 4.89323900  | 13.05242400 | H | 2.26219800  | 8.33696200  | 8.90781800  |
| C                           | 5.65905600 | 4.27426700  | 12.39994800 | H | 0.97242900  | 8.66074200  | 7.72657400  |
| H                           | 5.43601100 | 4.52199900  | 11.35165100 | H | 2.04404800  | 7.25190400  | 7.50857700  |
| H                           | 6.70763300 | 4.57538500  | 12.55923100 | C | 2.78798800  | 12.06394100 | 10.69883600 |
| C                           | 5.54271400 | 2.75757500  | 12.57563400 | C | 2.30939100  | 12.50676400 | 12.13853000 |
| H                           | 4.49968200 | 2.44986600  | 12.38359100 | O | 2.95687000  | 11.54833200 | 12.99179000 |
| H                           | 5.74467700 | 2.49830400  | 13.63073600 | O | 4.02360100  | 11.37182100 | 10.98130200 |
| C                           | 6.48901000 | 1.97656400  | 11.66475900 | C | 2.82261800  | 13.89183000 | 12.54830800 |
| H                           | 6.40138600 | 0.88790000  | 11.81159600 | H | 2.32447100  | 14.69929800 | 11.98427000 |
| H                           | 6.27666600 | 2.18320400  | 10.60424800 | H | 2.62132900  | 14.03855100 | 13.62296200 |
| H                           | 7.54024200 | 2.25522100  | 11.85074300 | H | 3.91168000  | 13.97287800 | 12.39463900 |
| Sn                          | 4.98246400 | 7.25613700  | 13.42195300 | C | 0.80221000  | 12.41469700 | 12.36392600 |
| O                           | 6.29503200 | 7.18606300  | 11.58407300 | H | 0.56547300  | 12.73076400 | 13.39440700 |
| C                           | 7.25670800 | 8.16963700  | 11.35587400 | H | 0.25499500  | 13.07324500 | 11.66565500 |
| H                           | 6.97506500 | 9.16392400  | 11.76154600 | H | 0.44300200  | 11.38226400 | 12.24232200 |
| H                           | 8.22966200 | 7.90314100  | 11.81492400 | C | 1.85369400  | 11.04316300 | 10.04532800 |
| H                           | 7.44453900 | 8.30851000  | 10.27175800 | H | 0.88469400  | 11.48927300 | 9.76385100  |
|                             |            |             |             | H | 2.33689900  | 10.65315000 | 9.13531000  |
|                             |            |             |             | H | 1.66931400  | 10.19350300 | 10.72144900 |
| <b>TS<sub>8'b-9'b</sub></b> |            |             |             | C | 3.06779600  | 13.21249900 | 9.73459000  |
| Cu                          | 4.60825200 | 6.40571400  | 11.47015500 | H | 3.38329400  | 12.80654100 | 8.75825100  |
| C                           | 1.58070500 | 3.68785300  | 8.56570000  | H | 2.15833100  | 13.81822400 | 9.57368400  |
| C                           | 2.03624900 | 2.81494700  | 7.56255300  | H | 3.86923700  | 13.86939200 | 10.10589700 |
| C                           | 3.25155400 | 3.12051600  | 6.97869800  | H | -2.12200200 | 9.70844800  | 15.52238400 |
| C                           | 4.01000500 | 4.21862600  | 7.39835500  | H | 0.18335200  | 10.02057100 | 14.59099200 |
| C                           | 3.60589500 | 5.08763500  | 8.40606200  | H | -0.02545900 | 6.09112300  | 12.81431000 |
| C                           | 2.31993300 | 4.80324700  | 8.94828800  | H | -2.28618900 | 5.78851500  | 13.72043100 |
| O                           | 0.43368500 | 4.98940500  | 10.83293300 | O | -3.61036800 | 7.66565100  | 15.23319900 |
| P                           | 4.74355100 | 6.32168200  | 9.17782300  | C | -4.35340100 | 6.49292200  | 15.04092600 |
| B                           | 3.96599700 | 10.93361300 | 12.29307700 | H | -4.55383100 | 6.29872500  | 13.96742500 |
| S                           | 1.52812800 | 5.85259200  | 10.22363500 | H | -5.31360000 | 6.63860600  | 15.56274400 |
| O                           | 5.14999800 | 4.27729300  | 6.64665200  | H | -3.84425500 | 5.60423900  | 15.46589200 |
| O                           | 3.90156700 | 2.46944100  | 5.96947400  |   |             |             |             |

|   |             |             |             |   |             |             |             |
|---|-------------|-------------|-------------|---|-------------|-------------|-------------|
| C | -1.64548200 | 8.92680900  | 14.92425500 | H | 5.98990100  | 4.04493000  | 10.41892000 |
| C | -0.36713200 | 9.09445600  | 14.40579100 | C | 8.73623100  | 5.72799200  | 8.23548300  |
| C | 0.25437100  | 8.07725200  | 13.64050300 | H | 7.17827800  | 7.05622700  | 7.55827100  |
| C | -0.47232600 | 6.88918000  | 13.41397500 | C | 9.06599500  | 4.64654700  | 9.05718500  |
| C | -1.76208300 | 6.72383100  | 13.92527600 | H | 8.31993900  | 3.19290300  | 10.47841900 |
| C | -2.35709300 | 7.73949300  | 14.68760100 | H | 9.50762500  | 6.21755900  | 7.63208200  |
| C | 1.57055200  | 8.24721100  | 13.13649100 | H | 10.09817800 | 4.28523600  | 9.10507000  |
| C | 2.73413800  | 8.34620700  | 12.76515800 | C | 7.05692500  | 8.21671600  | 14.91754100 |
| C | 4.09902800  | 8.45780400  | 12.39850900 | H | 7.16017500  | 9.07230600  | 14.22996800 |
| C | 4.81912800  | 9.75903000  | 12.86338500 | H | 6.62251500  | 8.61571600  | 15.85309500 |
| H | 5.84889400  | 9.76155700  | 12.47353200 | C | 8.42467700  | 7.58418100  | 15.18233100 |
| H | 4.87602300  | 9.81044000  | 13.96210100 | H | 8.32846300  | 6.76949700  | 15.92576400 |
| H | 4.18967900  | 8.40251400  | 11.29632300 | H | 8.79761000  | 7.09598400  | 14.26133200 |
| C | 5.21603500  | 3.05312800  | 5.88241500  | C | 9.48601400  | 8.57696300  | 15.67588100 |
| C | 5.54444700  | 3.39788400  | 4.43843700  | H | 9.12232800  | 9.06822000  | 16.59989700 |
| C | 6.96271100  | 3.97113200  | 4.32178300  | H | 9.59734600  | 9.38525000  | 14.92668100 |
| C | 7.99938900  | 3.01257700  | 4.92253000  | C | 10.84792200 | 7.92960700  | 15.93793500 |
| C | 7.65989200  | 2.67683800  | 6.37955400  | H | 11.24390000 | 7.45544900  | 15.02031100 |
| C | 6.24146900  | 2.11532500  | 6.51444600  | H | 11.59579600 | 8.66638100  | 16.28639500 |
| H | 7.19262200  | 4.18187600  | 3.26193900  | H | 10.77075300 | 7.13863200  | 16.70760800 |
| H | 5.45195300  | 2.47089800  | 3.84427400  | C | 3.80852500  | 6.75783800  | 15.34032500 |
| H | 4.78527000  | 4.10869500  | 4.07064900  | H | 4.02590600  | 5.95549300  | 16.07165900 |
| H | 8.02941500  | 2.08237000  | 4.32009300  | H | 2.98429300  | 6.40477600  | 14.70075400 |
| H | 9.00692100  | 3.46201800  | 4.86455000  | C | 3.44162000  | 8.05635700  | 16.05088900 |
| H | 8.38720300  | 1.95715600  | 6.79390100  | H | 3.30057700  | 8.86319500  | 15.31150100 |
| H | 7.73829900  | 3.58853400  | 6.99099100  | H | 4.27019000  | 8.38261100  | 16.71272700 |
| H | 6.15094000  | 1.13799900  | 6.00574200  | C | 2.15463100  | 7.94834700  | 16.88252800 |
| H | 5.97296800  | 1.96882300  | 7.57440000  | H | 1.33910700  | 7.59584900  | 16.22610600 |
| H | 7.00281600  | 4.93488900  | 4.86065800  | H | 2.28497900  | 7.17068800  | 17.66127100 |
| C | 4.78748300  | 7.74341700  | 8.00800600  | C | 1.74418400  | 9.27044000  | 17.53361200 |
| C | 4.94086100  | 9.02557400  | 8.55579900  | H | 1.58319000  | 10.04983800 | 16.76611000 |
| C | 4.66650700  | 7.60775000  | 6.61489800  | H | 0.80524100  | 9.17001200  | 18.10928000 |
| C | 4.97017100  | 10.15474600 | 7.73198600  | H | 2.52763400  | 9.64106600  | 18.22267300 |
| H | 5.01035800  | 9.15979500  | 9.63728300  | C | 6.38015500  | 4.76749300  | 14.61756300 |
| C | 4.69091200  | 8.73583300  | 5.79153600  | H | 6.87407300  | 4.89636500  | 15.60294800 |
| H | 4.56172300  | 6.61347700  | 6.17446900  | H | 5.47100100  | 4.16446200  | 14.78459300 |
| C | 4.84228900  | 10.01243800 | 6.34782500  | C | 7.30213500  | 4.05330500  | 13.63684300 |
| H | 5.08061000  | 11.14102600 | 8.19054500  | H | 6.76812500  | 3.93451900  | 12.68001100 |
| H | 4.59149600  | 8.61875600  | 4.70746300  | H | 8.18747500  | 4.67640400  | 13.40885800 |
| H | 4.85662500  | 10.89464600 | 5.69967000  | C | 7.76424100  | 2.67641500  | 14.13348700 |
| C | 6.42261000  | 5.59347400  | 8.96650300  | H | 6.87386500  | 2.07191600  | 14.39382900 |
| C | 6.75612200  | 4.49860400  | 9.78181800  | H | 8.33686300  | 2.79775800  | 15.07525400 |
| C | 7.42065800  | 6.19949500  | 8.19001300  | C | 8.61316300  | 1.91087900  | 13.11515600 |
| C | 8.06926100  | 4.02777800  | 9.81956100  | H | 8.97333800  | 0.94461400  | 13.51671300 |

|                           |             |             |             |   |             |             |             |
|---------------------------|-------------|-------------|-------------|---|-------------|-------------|-------------|
| H                         | 8.02925900  | 1.69465800  | 12.20118500 | H | 6.76994900  | 13.55226500 | 15.83059600 |
| H                         | 9.49859000  | 2.50040200  | 12.80977000 | H | 7.94442600  | 12.33129000 | 15.27838000 |
| Sn                        | 5.62426400  | 6.76298300  | 14.06949700 | H | 7.15107500  | 13.38990400 | 14.09229700 |
| O                         | 6.62899700  | 6.62196300  | 12.13030800 | C | 5.85883400  | 10.90695000 | 16.13630300 |
| C                         | 7.43565000  | 7.58341200  | 11.54316200 | H | 6.82047300  | 10.38433200 | 16.23045500 |
| H                         | 6.86499400  | 8.34001600  | 10.95555300 | H | 5.69409000  | 11.49950200 | 17.04788500 |
| H                         | 8.04371300  | 8.15055800  | 12.28251000 | H | 5.06791900  | 10.15003100 | 16.06285600 |
| H                         | 8.14716600  | 7.10441500  | 10.83720900 | C | 3.51885800  | 12.53813400 | 15.69613800 |
| Br                        | 3.75689700  | 4.23870500  | 12.13111100 | H | 3.93946400  | 13.22264700 | 16.44883000 |
|                           |             |             |             | H | 2.56439400  | 12.96156600 | 15.35031800 |
|                           |             |             |             | H | 3.30617800  | 11.57576300 | 16.17484800 |
| <b>TS<sub>8b-9b</sub></b> |             |             |             | C | 4.55164100  | 13.69525200 | 13.73220300 |
| Cu                        | 4.67447200  | 6.75303800  | 10.82382200 | H | 3.55286000  | 13.92905200 | 13.33584700 |
| C                         | 3.47433400  | 2.51003900  | 9.39120300  | H | 4.88020500  | 14.53250200 | 14.36525100 |
| C                         | 4.05693500  | 1.63374400  | 8.45863700  | H | 5.24204700  | 13.60865900 | 12.88050700 |
| C                         | 4.95272300  | 2.18051900  | 7.55688400  | H | -0.74292100 | 12.27364500 | 15.20622700 |
| C                         | 5.26926900  | 3.54595700  | 7.57267600  | H | 1.27881600  | 11.52948100 | 13.91275400 |
| C                         | 4.71854000  | 4.43794800  | 8.48319100  | H | -0.77976400 | 7.91416600  | 12.81983300 |
| C                         | 3.78511600  | 3.86673800  | 9.38927900  | H | -2.76720900 | 8.63961200  | 14.07500600 |
| O                         | 2.58024500  | 3.85991400  | 11.76453100 | O | -2.92047700 | 10.99893000 | 15.46017400 |
| P                         | 5.31115700  | 6.16129300  | 8.71537300  | C | -4.08799800 | 10.22363900 | 15.57441000 |
| B                         | 5.01595500  | 10.69170400 | 13.08457500 | H | -4.56350800 | 10.04576500 | 14.59220500 |
| S                         | 3.04456800  | 4.85692500  | 10.72205100 | H | -4.78344700 | 10.79082800 | 16.20779500 |
| O                         | 6.16796800  | 3.80637800  | 6.59041300  | H | -3.88827500 | 9.24537200  | 16.04910000 |
| O                         | 5.65616700  | 1.56285900  | 6.57413100  | C | -0.73285800 | 11.32326500 | 14.66870800 |
| H                         | 3.83423200  | 0.56633300  | 8.45751000  | C | 0.38052400  | 10.91284000 | 13.95177100 |
| H                         | 2.79800600  | 2.13901800  | 10.16269000 | C | 0.39401800  | 9.67264700  | 13.26801000 |
| C                         | 1.43077900  | 5.47525400  | 9.91670600  | C | -0.76603500 | 8.87860100  | 13.32926800 |
| C                         | 0.68770900  | 6.10302300  | 11.09629000 | C | -1.89229000 | 9.28875800  | 14.04725800 |
| H                         | 0.49745900  | 5.35666600  | 11.87950600 | C | -1.88148100 | 10.51472400 | 14.72789700 |
| H                         | -0.27689200 | 6.49783600  | 10.73883900 | C | 1.57708200  | 9.26131300  | 12.59643300 |
| H                         | 1.25060600  | 6.94032000  | 11.53146500 | C | 2.66432100  | 8.96166800  | 12.12531400 |
| C                         | 0.67570000  | 4.27166400  | 9.36753700  | C | 3.96548800  | 8.66446600  | 11.63897300 |
| H                         | 1.16039200  | 3.84829700  | 8.47644400  | C | 4.97815400  | 9.82626000  | 11.77164900 |
| H                         | -0.34082200 | 4.59018200  | 9.08521200  | H | 4.75973200  | 10.58082700 | 10.98371600 |
| H                         | 0.58586000  | 3.48957800  | 10.13538900 | H | 5.99429800  | 9.47167800  | 11.56485200 |
| C                         | 1.76365400  | 6.49843000  | 8.84099500  | H | 3.85429900  | 8.46205200  | 10.54317700 |
| H                         | 2.32773200  | 7.34958500  | 9.24613900  | C | 6.61223000  | 2.52247200  | 6.07071300  |
| H                         | 0.82355300  | 6.89426800  | 8.42380700  | C | 6.56980800  | 2.56522200  | 4.55541800  |
| H                         | 2.33273000  | 6.05806700  | 8.01016400  | C | 7.60881900  | 3.55035400  | 4.00666000  |
| C                         | 4.47388100  | 12.38464200 | 14.51994000 | C | 9.01190000  | 3.23344100  | 4.53692000  |
| C                         | 5.89067600  | 11.79835500 | 14.89497500 | C | 9.03209500  | 3.20625000  | 6.06872200  |
| O                         | 6.18486100  | 10.95591300 | 13.75419300 | C | 7.99888300  | 2.22189700  | 6.62474200  |
| O                         | 3.95455200  | 11.38690300 | 13.60962900 | H | 7.59261400  | 3.52834500  | 2.90558600  |
| C                         | 6.99957600  | 12.83545900 | 15.02708200 |   |             |             |             |

|   |             |             |             |    |            |             |             |
|---|-------------|-------------|-------------|----|------------|-------------|-------------|
| H | 6.77453200  | 1.54472400  | 4.19282100  | C  | 3.09296000 | 7.05340000  | 14.66713800 |
| H | 5.54778200  | 2.82867300  | 4.24264600  | H  | 3.06920000 | 6.12201600  | 15.26196800 |
| H | 9.33763800  | 2.25275800  | 4.14397300  | H  | 2.27870000 | 6.98685300  | 13.93253700 |
| H | 9.73372100  | 3.97660100  | 4.16182900  | C  | 2.92752000 | 8.27139800  | 15.56693300 |
| H | 10.03362700 | 2.94326000  | 6.44286800  | H  | 2.97890000 | 9.19313500  | 14.96561200 |
| H | 8.80721200  | 4.21025600  | 6.45784700  | H  | 3.76569300 | 8.32443500  | 16.28674700 |
| H | 8.24744200  | 1.18544700  | 6.34272600  | C  | 1.61267200 | 8.26356500  | 16.35803800 |
| H | 7.95474800  | 2.26651400  | 7.72423600  | H  | 0.77046900 | 8.20123100  | 15.64957100 |
| H | 7.32562800  | 4.57244400  | 4.30997000  | H  | 1.56854200 | 7.34374700  | 16.96962400 |
| C | 4.79919900  | 7.12953900  | 7.25077400  | C  | 1.43268300 | 9.48926700  | 17.25161300 |
| C | 4.56706600  | 8.49965500  | 7.45268200  | H  | 1.39165500 | 10.40882500 | 16.64830300 |
| C | 4.63075500  | 6.58376500  | 5.96830800  | H  | 0.49630400 | 9.43784700  | 17.83013400 |
| C | 4.17639600  | 9.31508400  | 6.38805900  | H  | 2.26546700 | 9.59097800  | 17.96893100 |
| H | 4.68738300  | 8.92756400  | 8.45132700  | C  | 5.09097000 | 4.59763500  | 13.62862400 |
| C | 4.22842100  | 7.40009000  | 4.90904900  | H  | 5.46953000 | 4.33889300  | 14.63439300 |
| H | 4.82775600  | 5.52639800  | 5.79457100  | H  | 4.04332700 | 4.26768700  | 13.58035000 |
| C | 4.00141200  | 8.76460100  | 5.11572300  | C  | 5.91028600 | 3.90604400  | 12.54456300 |
| H | 3.99821400  | 10.37947200 | 6.55692900  | H  | 5.61852700 | 4.30345800  | 11.55966700 |
| H | 4.09425100  | 6.96792000  | 3.91440100  | H  | 6.97496900 | 4.17661200  | 12.64207200 |
| H | 3.68584000  | 9.39882100  | 4.28392000  | C  | 5.75537000 | 2.38496800  | 12.50289500 |
| C | 7.12398000  | 5.97388000  | 8.54469100  | H  | 4.68505000 | 2.14741000  | 12.38061500 |
| C | 7.77214700  | 5.07107100  | 9.40257500  | H  | 6.06073400 | 1.95265000  | 13.47313900 |
| C | 7.88203600  | 6.77467300  | 7.68082600  | C  | 6.56173100 | 1.74633000  | 11.37133300 |
| C | 9.16208200  | 4.96518100  | 9.38451000  | H  | 6.43858200 | 0.65153300  | 11.33955800 |
| H | 7.19271500  | 4.47028300  | 10.10299400 | H  | 6.24457300 | 2.14075800  | 10.39177800 |
| C | 9.27652300  | 6.67462200  | 7.67763000  | H  | 7.63963800 | 1.95781400  | 11.47884900 |
| H | 7.38592500  | 7.47929500  | 7.01107600  | Sn | 5.02270700 | 6.79840800  | 13.61083500 |
| C | 9.91934000  | 5.77125600  | 8.52768600  | O  | 6.43344700 | 6.70254300  | 11.88836400 |
| H | 9.65644900  | 4.26102600  | 10.05773400 | C  | 7.52961900 | 7.51836700  | 11.60987900 |
| H | 9.86169700  | 7.30498000  | 7.00377300  | H  | 7.66595600 | 8.32954600  | 12.35036400 |
| H | 11.00906900 | 5.69450300  | 8.52299700  | H  | 8.46863900 | 6.92889000  | 11.60061700 |
| C | 6.58320100  | 7.67295100  | 14.86627300 | H  | 7.45372700 | 8.00134100  | 10.61404600 |
| H | 6.87040900  | 8.64514200  | 14.44103500 |    |            |             |             |
| H | 6.13066100  | 7.87983200  | 15.84893400 |    |            |             |             |
| C | 7.79272800  | 6.74929900  | 15.00319300 |    |            |             |             |
| H | 7.49967000  | 5.81584500  | 15.51764100 |    |            |             |             |
| H | 8.14348400  | 6.43407400  | 14.00601900 |    |            |             |             |
| C | 8.96324200  | 7.38778400  | 15.75888200 |    |            |             |             |
| H | 8.62045900  | 7.70105000  | 16.76198900 |    |            |             |             |
| H | 9.25676400  | 8.31723600  | 15.23790300 |    |            |             |             |
| C | 10.17425000 | 6.46536000  | 15.89053700 |    |            |             |             |
| H | 10.55120800 | 6.16332000  | 14.89882400 |    |            |             |             |
| H | 11.00382500 | 6.95022600  | 16.43014300 |    |            |             |             |
| H | 9.91473500  | 5.54262900  | 16.43642300 |    |            |             |             |



## 11. Characterization Data for allene products.

(S)-4-(4-methoxyphenyl)-4-(tributylstannyl)buta-2,3-dien-1-ol (**2a**)

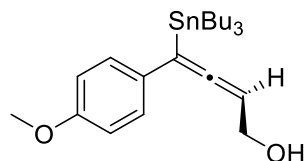

Colorless oil (71 mg, 76 % yield, 97 % *ee*).  $^1\text{H NMR}$  (400 MHz,  $\text{CDCl}_3$ ):  $\delta$  = 7.17 (d,  $J$  = 8.7 Hz, 2H), 6.86 (d,  $J$  = 8.7 Hz, 2H), 5.24 (tt,  $J$  = 6.6, 6.6 Hz, 1H), 4.26-4.19 (m, 2H), 3.82 (s, 3H), 1.56-1.46 (m, 6H), 1.38-1.29 (m, 7H), 1.16-0.99 (m, 6H), 0.90 (t,  $J$  = 7.2 Hz, 9H);  $^{13}\text{C NMR}$  (101 MHz,  $\text{CDCl}_3$ ):  $\delta$  = 202.2, 158.4, 130.2, 128.9, 114.1, 98.4, 84.9, 61.7, 55.3, 28.9, 27.2, 13.7, 11.1; **HRMS (M/Z, ESI)** Calcd. for  $\text{C}_{23}\text{H}_{38}\text{O}_2\text{Sn}$  [M+Na]: 489.1791, Found: 489.1794; **HPLC analysis:** Daicel Chiralpak IC, hexane/iso-propanol = 50: 1, 0.5 ml/min,  $\lambda$  = 254 nm, retention time: 16.63 min (minor) and 17.99 min (major). Optical Rotation:  $[\alpha]_{\text{D}}^{25}$  -19.6 (c 0.915,  $\text{CHCl}_3$ ).

(S)-4-(4-methoxyphenyl)-2-phenyl-4-(tributylstannyl)buta-2,3-dien-1-ol-d (**2a-d**)

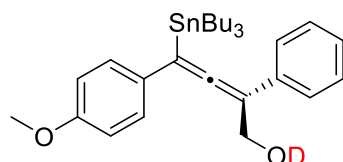

$^1\text{H NMR}$  (400 MHz,  $\text{CDCl}_3$ ):  $\delta$  = 7.17 (d,  $J$  = 8.7 Hz, 2H), 6.86 (d,  $J$  = 8.7 Hz, 2H), 5.24 (tt,  $J$  = 6.6, 6.6 Hz, 1H), 4.24-4.16 (m, 2H), 3.82 (s, 3H), 1.62-1.48 (m, 6H), 1.38-1.31 (m, 6H), 1.16-0.99 (m, 6H), 0.90 (t,  $J$  = 7.2 Hz, 9H).

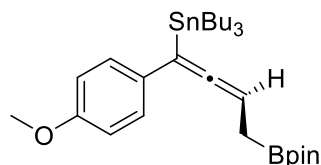

**2a'**

$^1\text{H NMR}$  (400 MHz,  $\text{CDCl}_3$ ):  $\delta$  = 7.21 (d,  $J$  = 8.4 Hz, 2H), 6.83 (d,  $J$  = 8.4 Hz, 2H), 5.06 (tt,  $J$  = 7.6, 7.6 Hz, 1H); 3.81 (s, 3H), 1.74-1.61 (m, 2H), 1.58-1.50 (m, 6H), 1.36-1.31 (m, 6H), 1.28-1.27 (m, 12H), 1.13-0.99 (m, 6H), 0.90 (t,  $J$  = 7.2 Hz, 9H);  $^{13}\text{C NMR}$  (101 MHz,  $\text{CDCl}_3$ ):  $\delta$  = 205.3, 157.9, 131.9, 128.9, 113.8, 95.9, 83.3, 79.7, 55.2, 29.0, 27.3, 24.9, 24.8, 13.7, 10.9; **HRMS (M/Z, ESI)** Calcd. for  $\text{C}_{29}\text{H}_{49}\text{BO}_3\text{Sn}$  [M+Na]: 599.2694, Found: 599.2702; Optical Rotation:  $[\alpha]_{\text{D}}^{25}$  -23.9 (c 0.935,  $\text{CHCl}_3$ ).

(S)-4-phenyl-4-(tributylstannyl)buta-2,3-dien-1-ol (**2b**)

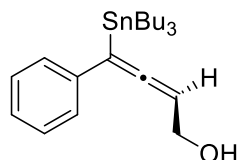

Colorless oil (75 mg, 86% yield).  $^1\text{H NMR}$  (400 MHz,  $\text{CDCl}_3$ ):  $\delta$  = 7.33-7.28 (m, 2H), 7.25-7.18 (m, 3H), 5.26 (tt,  $J$  = 6.8, 6.4 Hz, 1H), 4.28-4.18 (m, 2H), 1.59-1.44 (m, 6H), 1.38-1.28 (m, 7H), 1.17-1.02 (m, 6H), 0.90 (t,  $J$  = 7.3 Hz, 9H);  $^{13}\text{C NMR}$  (101 MHz,  $\text{CDCl}_3$ ):  $\delta$  = 202.8, 138.2, 128.6, 127.8, 126.3, 99.0, 84.7, 61.6, 28.9, 27.2, 13.6, 11.1; **HRMS (M/Z, ESI)** Calcd. for

$C_{23}H_{38}O_2Sn$  [M+Na]: 459.1686, Found: 459.1682; Optical Rotation:  $[\alpha]_D^{25}$  -28.2 (c 1.315,  $CHCl_3$ ); The *ee* value of **2b** was determined by chiral HPLC analysis after derivatization to **2b'**.  
(*S*)-4-phenyl-4-(tributylstannyl)buta-2,3-dien-1-yl ((*R*)-1-phenylethyl)carbamate (**2b'**)

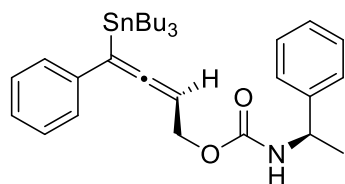

Colorless oil (93% *ee*).  $^1H$  NMR (400 MHz,  $CDCl_3$ ):  $\delta$  = 7.37-7.30 (m, 7H), 7.26-7.17 (m, 3H), 5.17 (t,  $J$  = 7.3 Hz, 1H), 4.94-4.88 (m, 2H), 4.64-4.63 (m, 2H), 1.57-1.43 (m, 9H), 1.37-1.28 (m, 6H), 1.16-1.01 (m, 6H), 0.89 (t,  $J$  = 7.3 Hz, 9H);  $^{13}C$  NMR (101 MHz,  $CDCl_3$ ):  $\delta$  = 204.0, 155.6, 143.6, 137.9, 128.6, 128.5, 128.0, 127.3, 126.4, 126.0, 98.1, 80.4, 64.0, 50.6, 28.9, 27.2, 22.5, 13.7, 11.1; HRMS (M/Z, ESI) Calcd. for  $C_{31}H_{45}NO_2Sn$  [M+Na]: 606.2370, Found: 606.2362; HPLC analysis: Daicel Chiralpak OD-H, hexane/iso-propanol = 50: 1, 0.5 ml/min,  $\lambda$  = 254 nm, retention time: 8.59 min (major) and 14.74 min (minor).

(*S*)-4-(*p*-tolyl)-4-(tributylstannyl)buta-2,3-dien-1-ol (**2c**)

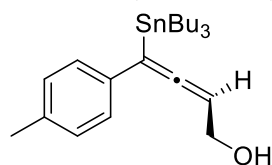

Colorless oil (72 mg, 80% yield).  $^1H$  NMR (400 MHz,  $CDCl_3$ ):  $\delta$  = 7.16-7.11 (m, 4H), 5.24 (tt,  $J$  = 6.6, 6.6 Hz, 1H), 4.27-4.17 (m, 2H), 2.35 (s, 3H), 1.59-1.46 (m, 6H), 1.40-1.29 (m, 7H), 1.17-1.00 (m, 6H), 0.90 (t,  $J$  = 7.3 Hz, 9H);  $^{13}C$  NMR (101 MHz,  $CDCl_3$ ):  $\delta$  = 202.6, 136.1, 135.0, 129.3, 127.7, 98.7, 84.8, 61.7, 28.9, 27.2, 21.1, 13.7, 11.1; HRMS (M/Z, ESI) Calcd. for  $C_{23}H_{38}OSn$  [M+Na]: 473.1842, Found: 473.1851; Optical Rotation:  $[\alpha]_D^{25}$  -26.9 (c 1.105,  $CHCl_3$ ). The *ee* value of **2c** was determined by chiral HPLC analysis after a derivatization to **2c'**.

(*S*)-4-(*p*-tolyl)-4-(tributylstannyl)buta-2,3-dien-1-yl ((*R*)-1-phenylethyl)carbamate (**2c'**)

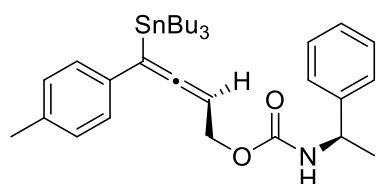

Colorless oil (94% *ee*).  $^1H$  NMR (400 MHz,  $CDCl_3$ ):  $\delta$  = 7.39-7.35 (m, 5H), 7.16-7.11 (m, 4H), 5.18 (t,  $J$  = 7.2 Hz, 1H), 4.98-4.90 (m, 2H), 4.66-4.64 (m, 2H), 2.36 (s, 3H), 1.59-1.50 (m, 9H), 1.39-1.30 (m, 6H), 1.18-1.03 (m, 6H), 0.91 (t,  $J$  = 7.3 Hz, 9H);  $^{13}C$  NMR (101 MHz,  $CDCl_3$ ):  $\delta$  = 203.8, 155.6, 143.6, 136.1, 134.7, 129.3, 128.6, 127.9, 127.3, 126.0, 97.8, 80.4, 64.1, 50.6, 28.9, 27.2, 22.5, 21.1, 13.7, 11.1; HRMS (M/Z, ESI) Calcd. for  $C_{32}H_{47}NO_2Sn$  [M+Na]: 620.2526, Found: 620.2535; HPLC analysis: Daicel Chiralpak OD-H, hexane/iso-propanol = 50: 1, 1.0 ml/min,  $\lambda$  = 254 nm, retention time: 8.16 min (major) and 11.60 min (minor).

(*S*)-4-(4-(tert-butyl)phenyl)-4-(tributylstannyl)buta-2,3-dien-1-ol (**2d**)

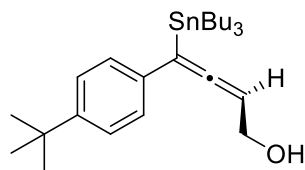

Colorless oil (62 mg, 63% yield).  $^1\text{H NMR}$  (400 MHz,  $\text{CDCl}_3$ ):  $\delta$  = 7.36 (d,  $J$  = 8.4 Hz, 2H), 7.21 (d,  $J$  = 8.0 Hz, 2H), 5.26 (tt,  $J$  = 6.4, 6.8 Hz, 1H), 4.26-4.21 (m, 2H), 1.61-1.51 (m, 7H), 1.39-1.34 (m, 15H), 1.20-1.03 (m, 6H), 0.92 (t,  $J$  = 7.2 Hz, 9H);  $^{13}\text{C NMR}$  (101 MHz,  $\text{CDCl}_3$ ):  $\delta$  = 202.7, 149.4, 134.9, 127.5, 125.5, 98.6, 84.8, 61.7, 34.5, 31.3, 28.9, 27.2, 13.7, 11.1; **HRMS (M/Z, ESI)** Calcd. for  $\text{C}_{26}\text{H}_{44}\text{OSn}$  [M+Na]: 515.2312, Found: 515.2323; Optical Rotation:  $[\alpha]_{\text{D}}^{25}$  -19.7 (c 0.75,  $\text{CHCl}_3$ ). The *ee* value of **2d** was determined by chiral HPLC analysis after derivatization to **2d'**.

(*S*)-4-(4-(tert-butyl)phenyl)-4-(tributylstannyl)buta-2,3-dien-1-yl ((*R*)-1-phenylethyl)carbamate (**2d'**)

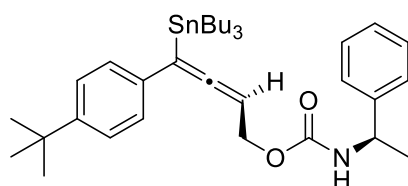

Colorless oil (94% *ee*).  $^1\text{H NMR}$  (400 MHz,  $\text{CDCl}_3$ ):  $\delta$  = 7.36-7.30 (m, 7H), 7.22-7.20 (m, 2H), 5.20 (t,  $J$  = 7.3 Hz, 1H), 5.02-4.91 (m, 2H), 4.67-4.65 (m, 2H), 1.62-1.51 (m, 9H), 1.41-1.32 (m, 15H), 1.19-1.06 (m, 6H), 0.93 (t,  $J$  = 7.3 Hz, 9H);  $^{13}\text{C NMR}$  (101 MHz,  $\text{CDCl}_3$ ):  $\delta$  = 204.0, 155.7, 149.4, 143.7, 134.7, 128.6, 127.7, 127.3, 126.0, 125.5, 97.7, 80.5, 64.1, 50.6, 34.5, 31.4, 29.0, 27.2, 22.5, 13.7, 11.1; **HRMS (M/Z, ESI)** Calcd. for  $\text{C}_{35}\text{H}_{53}\text{NO}_2\text{Sn}$  [M+H]: 640.3171, Found: 640.3180. **HPLC analysis:** Daicel Chiralpak OD-H, hexane/iso-propanol = 50: 1, 1.0 ml/min,  $\lambda$  = 254 nm, retention time: 7.22 min (major) and 9.78 min (minor).

(*S*)-4-([1,1'-biphenyl]-4-yl)-4-(tributylstannyl)buta-2,3-dien-1-ol (**2e**)

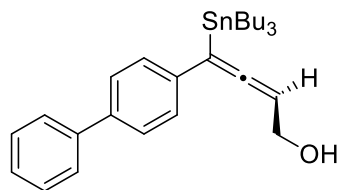

Colorless oil (96 mg, 94% yield, 94% *ee*).  $^1\text{H NMR}$  (400 MHz,  $\text{CDCl}_3$ ):  $\delta$  = 7.64-7.62 (m, 2H), 7.57 (d,  $J$  = 8.3 Hz, 2H), 7.46 (t,  $J$  = 7.3 Hz, 2H), 7.38-7.32 (m, 3H), 5.30 (tt,  $J$  = 6.8, 6.8 Hz, 1H), 4.31-4.21 (m, 2H), 1.62-1.50 (m, 6H), 1.47-1.44 (t,  $J$  = 6.0 Hz, 1H, OH), 1.41-1.30 (m, 6H), 1.22-1.05 (m, 6H), 0.93 (t,  $J$  = 7.3 Hz, 9H);  $^{13}\text{C NMR}$  (101 MHz,  $\text{CDCl}_3$ ):  $\delta$  = 203.1, 140.8, 139.2, 137.2, 128.7, 128.3, 127.3, 127.2, 126.9, 98.7, 84.9, 61.6, 28.9, 27.2, 13.7, 11.2; **HRMS (M/Z, ESI)** Calcd. for  $\text{C}_{28}\text{H}_{40}\text{OSn}$  [M+Na]: 535.1999, Found: 535.1997; **HPLC analysis:** Daicel Chiralpak OZ-H, hexane/iso-propanol = 100: 1, 1.0 ml/min,  $\lambda$  = 254 nm, retention time: 8.56 min (minor) and 10.17 min (major); Optical Rotation:  $[\alpha]_{\text{D}}^{25}$  -0.33 (c 1.90,  $\text{CHCl}_3$ ).

(*S*)-4-(4-fluorophenyl)-4-(tributylstannyl)buta-2,3-dien-1-ol (**2f**)

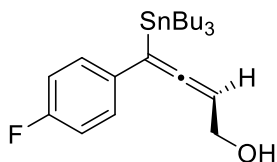

Colorless oil (74 mg, 81% yield).  $^1\text{H NMR}$  (400 MHz,  $\text{CDCl}_3$ ):  $\delta$  = 7.21-7.18 (m, 2H), 7.00 (t,  $J$  = 8.6 Hz, 2H), 5.25 (tt,  $J$  = 6.6, 6.6 Hz, 1H), 4.24-4.20 (m, 2H), 1.58-1.48 (m, 7H), 1.38-1.29 (m, 6H), 1.17-1.02 (m, 6H), 0.90 (t,  $J$  = 7.3 Hz, 9H);  $^{13}\text{C NMR}$  (101 MHz,  $\text{CDCl}_3$ ):  $\delta$  = 202.7, 161.6 (d,  $J$  = 243.9 Hz), 134.17 (d,  $J$  = 3.2 Hz), 129.15 (d,  $J$  = 7.8 Hz), 115.4 (d,  $J$  = 21.6 Hz), 97.98, 84.9, 61.5, 28.9, 27.2, 13.6, 11.1;  $^{19}\text{F NMR}$  (376 MHz,  $\text{CDCl}_3$ ):  $\delta$  = -116.5; HRMS (M/Z, ESI) Calcd. for  $\text{C}_{22}\text{H}_{35}\text{FOSn}$  [M+Na]: 477.1592, Found: 477.1598; Optical Rotation:  $[\alpha]_{\text{D}}^{25}$  -38.2 (c 3.86,  $\text{CHCl}_3$ ). The *ee* value of **2f** was determined by chiral HPLC analysis after derivatization to **2f'**.

(*S*)-4-(4-fluorophenyl)-4-(tributylstannyl)buta-2,3-dien-1-yl ((*R*)-1-phenylethyl)carbamate (**2f'**)

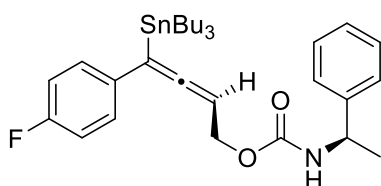

Colorless oil (94% *ee*).  $^1\text{H NMR}$  (400 MHz,  $\text{CDCl}_3$ ):  $\delta$  = 7.37-7.26 (m, 5H), 7.20-7.16 (m, 2H), 7.01-6.97 (m, 2H), 5.17 (t,  $J$  = 7.2 Hz, 1H), 4.95-4.88 (m, 2H), 4.64-4.62 (m, 2H), 1.56-1.49 (m, 9H), 1.35-1.28 (m, 6H), 1.14-1.01 (m, 6H), 0.89 (t,  $J$  = 7.3 Hz, 9H);  $^{13}\text{C NMR}$  (101 MHz,  $\text{CDCl}_3$ ):  $\delta$  = 203.9, 161.6 (d,  $J$  = 246.5 Hz), 155.6, 143.5, 133.8 (d,  $J$  = 3.2 Hz), 129.3 (d,  $J$  = 8.1 Hz), 128.6, 127.3, 125.9, 115.4 (d,  $J$  = 21.5 Hz), 91.2, 80.7, 63.8, 50.6, 28.9, 27.2, 22.5, 13.7, 11.1; HRMS (M/Z, ESI) Calcd. for  $\text{C}_{31}\text{H}_{44}\text{FNO}_2\text{Sn}$  [M+Na]: 624.2270, Found: 624.2274; HPLC analysis: Daicel Chiralpak OD-H, hexane/iso-propanol = 50: 1, 0.5 ml/min,  $\lambda$  = 254 nm, retention time: 13.27 min (major) and 15.05 min (minor).

(*S*)-4-(4-chlorophenyl)-4-(tributylstannyl)buta-2,3-dien-1-yl (**2g**)

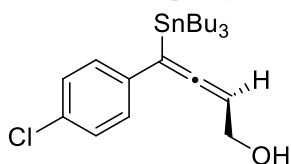

Colorless oil (80 mg, 85% yield).  $^1\text{H NMR}$  (400 MHz,  $\text{CDCl}_3$ ):  $\delta$  = 7.27 (m, 2H), 7.16 (m, 2H), 5.26 (tt,  $J$  = 6.8, 6.8 Hz, 1H), 4.27-4.17 (m, 2H), 1.62-1.45 (m, 6H), 1.41-1.38 (t,  $J$  = 6 Hz, 1H, OH), 1.36-1.29 (m, 6H), 1.16-1.00 (m, 6H), 0.90 (t,  $J$  = 7.3 Hz, 9H);  $^{13}\text{C NMR}$  (101 MHz,  $\text{CDCl}_3$ ):  $\delta$  = 203.0, 136.9, 131.99, 128.99, 128.68, 98.1, 85.1, 61.4, 28.9, 27.2, 13.7, 11.2; HRMS (M/Z, ESI) Calcd. for  $\text{C}_{22}\text{H}_{35}\text{ClOSn}$  [M+Na]: 493.1296, Found: 493.1284; Optical Rotation:  $[\alpha]_{\text{D}}^{25}$  -16.8 (c 2.10,  $\text{CHCl}_3$ ). The *ee* value of **2g** was determined by chiral HPLC analysis after derivatization to **2g'**.

(*S*)-4-(4-chlorophenyl)-4-(tributylstannyl)buta-2,3-dien-1-yl ((*R*)-1-phenylethyl)carbamate (**2g'**)

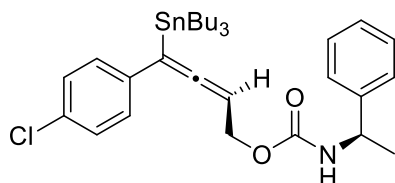

Colorless oil (89% *ee*).  $^1\text{H NMR}$  (400 MHz,  $\text{CDCl}_3$ ):  $\delta$  = 7.36-7.25 (m, 7H), 7.17-7.15 (m, 2H), 5.19 (t,  $J$  = 7.2 Hz, 1H), 4.98-4.89 (m, 2H), 4.65-4.63 (m, 2H), 1.58-1.49 (m, 9H), 1.38-1.29 (m, 6H), 1.17-1.01 (m, 6H), 0.91 (t,  $J$  = 7.3 Hz, 9H);  $^{13}\text{C NMR}$  (101 MHz,  $\text{CDCl}_3$ ):  $\delta$  = 204.2, 155.5, 143.6, 136.6, 132.8, 132.0, 129.1, 128.7, 127.3, 126.0, 97.3, 80.8, 63.7, 50.7, 28.9, 27.2, 22.5, 13.7, 11.2; **HRMS (M/Z, ESI)** Calcd. for  $\text{C}_{31}\text{H}_{44}\text{ClNO}_2\text{Sn}$  [ $\text{M}+\text{Na}$ ]: 640.1980, Found: 640.1984; **HPLC analysis:** Daicel Chiralpak OD-H, hexane/iso-propanol = 50: 1, 1.0 ml/min,  $\lambda$  = 254 nm, retention time: 8.67 min (major) and 11.44 min (minor).

(*S*)-4-(4-bromophenyl)-4-(tributylstannyl)buta-2,3-dien-1-ol (**2h**)

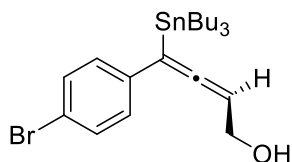

Colorless oil (86 mg, 86% yield).  $^1\text{H NMR}$  (400 MHz,  $\text{CDCl}_3$ ):  $\delta$  = 7.43-7.41 (d,  $J$  = 8.4 Hz, 2H), 7.11-7.10 (d,  $J$  = 8.4 Hz, 2H), 5.25 (tt,  $J$  = 6.4, 6.4 Hz, 1H), 4.27-4.17 (m, 2H), 1.60-1.50 (m, 6H), 1.43 (t,  $J$  = 6.0 Hz, 1H, OH), 1.38-1.29 (m, 6H), 1.18-1.00 (m, 6H), 0.90 (t,  $J$  = 7.3 Hz, 9H);  $^{13}\text{C NMR}$  (101 MHz,  $\text{CDCl}_3$ ):  $\delta$  = 203.0, 137.4, 131.6, 129.4, 120.0, 98.2, 61.4, 28.9, 27.2, 13.7, 11.2; **HRMS (M/Z, ESI)** Calcd. for  $\text{C}_{22}\text{H}_{35}\text{BrOSn}$  [ $\text{M}+\text{Na}$ ]: 537.0791, Found: 537.0780; Optical Rotation:  $[\alpha]_{\text{D}}^{25}$  -11.6 (c 2.53,  $\text{CHCl}_3$ ). The *ee* value of **2h** was determined by chiral HPLC analysis after derivatization to **2h'**.

(*S*)-4-(4-bromophenyl)-4-(tributylstannyl)buta-2,3-dien-1-yl ((*R*)-1-phenylethyl)carbamate (**2h'**)

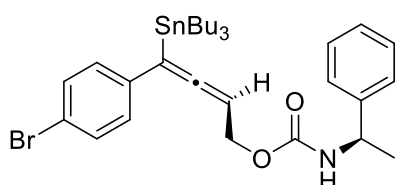

Colorless oil (90% *ee*).  $^1\text{H NMR}$  (400 MHz,  $\text{CDCl}_3$ ):  $\delta$  = 7.43-7.29 (m, 7H), 7.11-7.09 (m, 2H), 5.18 (t,  $J$  = 7.2 Hz, 1H), 4.98-4.88 (m, 2H), 4.65-4.63 (m, 2H), 1.60-1.45 (m, 9H), 1.38-1.29 (m, 6H), 1.17-1.02 (m, 6H), 0.90 (t,  $J$  = 7.3 Hz, 9H);  $^{13}\text{C NMR}$  (101 MHz,  $\text{CDCl}_3$ ):  $\delta$  = 204.2, 155.5, 143.5, 137.1, 131.6, 129.5, 128.6, 127.3, 125.9, 120.1, 97.4, 80.9, 63.6, 50.7, 28.9, 27.2, 22.5, 13.7, 11.2; **HRMS (M/Z, ESI)** Calcd. for  $\text{C}_{31}\text{H}_{44}\text{BrNO}_2\text{Sn}$  [ $\text{M}+\text{Na}$ ]: 684.1475, Found: 684.1455; **HPLC analysis:** Daicel Chiralpak OD-H, hexane/iso-propanol = 50: 1, 1.0 ml/min,  $\lambda$  = 254 nm, retention time: 9.06 min (major) and 12.37 min (minor).

ethyl (*S*)-4-(4-hydroxy-1-(tributylstannyl)buta-1,2-dien-1-yl)benzoate (**2i**)

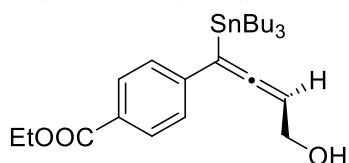

Colorless oil (79 mg, 78% yield, 68% ee). **<sup>1</sup>H NMR (400 MHz, CDCl<sub>3</sub>):** δ = 7.98 (d, *J* = 8.3 Hz, 2H), 7.29-7.27 (m, 2H), 5.29 (tt, *J* = 6.7, 6.7 Hz, 1H), 4.39 (q, *J* = 7.1, 7.1 Hz, 2H), 4.29-4.19 (m, 2H), 1.58-1.50 (m, 6H), 1.43-1.39 (m, 4H), 1.36-1.26 (m, 6H), 1.18-1.01 (m, 6H), 0.90 (t, *J* = 7.3 Hz, 9H); **<sup>13</sup>C NMR (101 MHz, CDCl<sub>3</sub>):** δ = 203.8, 166.5, 143.5, 129.9, 128.2, 127.7, 98.7, 85.0, 61.4, 60.1, 28.9, 27.2, 14.4, 13.7, 11.2; **HRMS (M/Z, ESI)** Calcd. for C<sub>25</sub>H<sub>40</sub>O<sub>3</sub>Sn [M+Na]: 531.1897, Found: 531.1904; **HPLC analysis:** Daicel Chiralpak IC, hexane/iso-propanol = 50: 1, 1.0 ml/min, λ = 254 nm, retention time: 26.66 min (minor) and 32.94 min (major); Optical Rotation: [α]<sub>D</sub><sup>25</sup> -4.27 (c 4.05, CHCl<sub>3</sub>).

(*S*)-4-(tributylstannyl)-4-(4-(trifluoromethyl)phenyl)buta-2,3-dien-1-ol (**2j**)

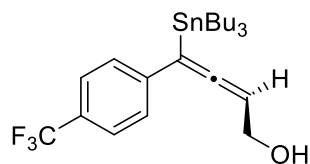

Colorless oil (74 mg, 74% yield, 80% ee). **<sup>1</sup>H NMR (400 MHz, CDCl<sub>3</sub>):** δ = 7.55 (d, *J* = 8.1 Hz, 2H), 7.32 (d, *J* = 8.1 Hz, 2H), 5.29 (tt, *J* = 6.7, 6.7 Hz, 1H), 4.29-4.19 (m, 2H), 1.58-1.45 (m, 6H), 1.39-1.31 (m, 7H), 1.18-1.01 (m, 6H), 0.90 (t, *J* = 7.3 Hz, 9H); **<sup>13</sup>C NMR (101 MHz, CDCl<sub>3</sub>):** δ = 203.8, 142.6, 131.9, 128.2 (d, *J* = 30 Hz), 127.9 (t, *J* = 8 Hz), 126.3 (d, *J* = 130 Hz), 125.4 (q, *J* = 3.7 Hz), 98.3, 85.1, 61.3, 28.9, 27.2, 13.6, 11.2; **<sup>19</sup>F NMR (376 MHz, CDCl<sub>3</sub>):** δ = -62.3; **HRMS (M/Z, ESI)** Calcd. for C<sub>23</sub>H<sub>35</sub>F<sub>3</sub>O<sub>3</sub>Sn [M+Na]: 527.1560, Found: 527.1553; **HPLC analysis:** Daicel Chiralpak OZ-H, hexane/iso-propanol = 500: 1, 1.0 ml/min, λ = 254 nm, retention time: 15.90 min (minor) and 19.04 min (major); Optical Rotation: [α]<sub>D</sub><sup>25</sup> -19.7 (c 0.76, CHCl<sub>3</sub>).

(*S*)-4-(2-fluorophenyl)-4-(tributylstannyl)buta-2,3-dien-1-ol (**2k**)

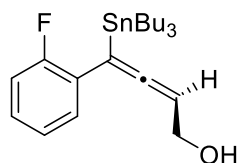

Colorless oil (85 mg, 94% yield, 90% ee). **<sup>1</sup>H NMR (400 MHz, CDCl<sub>3</sub>):** δ = 7.28-7.23 (m, 1H), 7.20-7.14 (m, 1H), 7.11-7.07 (m, 1H), 7.05-7.00 (m, 1H), 5.21 (tt, *J* = 6.7, 6.6 Hz, 1H), 4.29-4.18 (m, 2H), 1.59-1.46 (m, 7H), 1.37-1.28 (m, 6H), 1.13-0.97 (m, 6H), 0.90 (t, *J* = 7.3 Hz, 9H); **<sup>13</sup>C NMR (101 MHz, CDCl<sub>3</sub>):** δ = 203.5, 159.6 (d, *J* = 244.1 Hz), 130.06 (d, *J* = 3.3 Hz), 127.7 (d, *J* = 8.1 Hz), 124.24 (d, *J* = 3.5 Hz), 115.47 (d, *J* = 22.0 Hz), 92.35 (d, *J* = 5.0 Hz), 61.5, 28.8, 27.2, 13.7, 11.3 (d, *J* = 3.2 Hz); **<sup>19</sup>F NMR (376 MHz, CDCl<sub>3</sub>):** δ = -115.0; **HRMS (M/Z, ESI)** Calcd. for C<sub>22</sub>H<sub>35</sub>FOSn [M+Na]: 477.1592, Found: 477.1606; **HPLC analysis:** Daicel Chiralpak OZ-H, hexane/iso-propanol = 500: 1, 1.0 ml/min, λ = 254 nm, retention time: 17.75 min (minor) and 29.35 min (major); Optical Rotation: [α]<sub>D</sub><sup>25</sup> -27.8 (c 0.89, CHCl<sub>3</sub>).

(*S*)-4-(2-chlorophenyl)-4-(tributylstannyl)buta-2,3-dien-1-ol (**2l**)

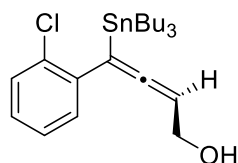

Colorless oil (45 mg, 48% yield). **<sup>1</sup>H NMR (400 MHz, CDCl<sub>3</sub>):** δ = 7.37-7.35 (m, 1H), 7.22-7.10

(m, 3H), 5.10 (tt,  $J = 6.6, 6.4$  Hz, 1H), 4.25-4.19 (m, 2H), 1.54-1.47 (m, 6H), 1.42 (t,  $J = 6.2$  Hz, 1H, OH), 1.34-1.25 (m, 6H), 1.09-0.96 (m, 6H), 0.88 (t,  $J = 7.3$  Hz, 9H);  $^{13}\text{C}$  NMR (101 MHz,  $\text{CDCl}_3$ ):  $\delta = 201.7, 138.1, 132.0, 129.7, 129.4, 127.1, 126.9, 97.4, 88.8, 61.4, 28.8, 27.2, 13.7, 11.8$ ; HRMS (M/Z, ESI) Calcd. for  $\text{C}_{22}\text{H}_{35}\text{ClOSn}$  [M+Na]: 493.1296, Found: 493.1286; Optical Rotation:  $[\alpha]_{\text{D}}^{25} -34.6$  (c 1.12,  $\text{CHCl}_3$ ); The *ee* value of **2l** was determined by chiral HPLC analysis after derivatization to **2l'**.

(*S*)-4-(2-chlorophenyl)-4-(tributylstannyl)buta-2,3-dien-1-yl ((*R*)-1-phenylethyl)carbamate (**2l'**)

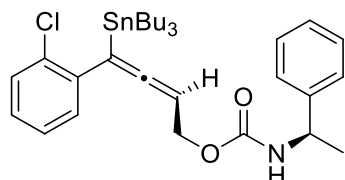

Colorless oil (83% *ee*).  $^1\text{H}$  NMR (400 MHz,  $\text{CDCl}_3$ ):  $\delta = 7.37-7.27$  (m, 6H), 7.23-7.11 (m, 3H), 5.09-4.89 (m, 3H), 4.68-4.66 (br, 2H), 1.60-1.45 (m, 9H), 1.36-1.27 (m, 6H), 1.14-1.00 (m, 6H), 0.90 (t,  $J = 7.2$  Hz, 9H);  $^{13}\text{C}$  NMR (101 MHz,  $\text{CDCl}_3$ ):  $\delta = 202.8, 155.6, 143.6, 137.7, 132.0, 129.9, 129.4, 128.6, 127.3, 127.1, 126.9, 126.0, 96.5, 78.5, 69.3, 50.6, 28.8, 27.2, 22.5, 13.7, 11.9$ ; HRMS (M/Z, ESI) Calcd. for  $\text{C}_{31}\text{H}_{44}\text{ClNO}_2\text{Sn}$  [M+Na]: 640.1980, Found: 640.1976; HPLC analysis: Daicel Chiralpak ODH-H, hexane/iso-propanol = 50: 1, 1.0 ml/min,  $\lambda = 254$  nm, retention time: 9.217 min (major) and 18.923 min (minor).

(*S*)-4-(2-bromophenyl)-4-(tributylstannyl)buta-2,3-dien-1-ol (**2m**)

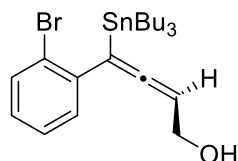

Colorless oil (93 mg, 90% yield).  $^1\text{H}$  NMR (400 MHz,  $\text{CDCl}_3$ ):  $\delta = 7.55$  (d,  $J = 7.3$  Hz, 1H), 7.27-7.23 (m, 1H), 7.13-7.11 (m, 1H), 7.06-7.02 (m, 1H), 5.09 (tt,  $J = 6.6, 6.6$  Hz, 1H), 4.27-4.19 (m, 2H), 1.57-1.42 (m, 7H), 1.36-1.25 (m, 6H), 1.12-0.97 (m, 6H), 0.88 (t,  $J = 7.3$  Hz, 9H);  $^{13}\text{C}$  NMR (101 MHz,  $\text{CDCl}_3$ ):  $\delta = 201.3, 140.1, 132.6, 129.4, 127.4, 127.2, 122.5, 99.6, 88.9, 61.3, 28.8, 27.2, 13.7, 11.9$ ; HRMS (M/Z, ESI) Calcd. for  $\text{C}_{22}\text{H}_{35}\text{BrOSn}$  [M+Na]: 537.0791, Found: 537.0776; Optical Rotation:  $[\alpha]_{\text{D}}^{25} -44.7$  (c 0.93,  $\text{CHCl}_3$ ); The *ee* value of **2m** was determined by chiral HPLC analysis after derivatization to **2m'**.

(*S*)-4-(2-bromophenyl)-4-(tributylstannyl)buta-2,3-dien-1-yl ((*R*)-1-phenylethyl)carbamate (**2m'**)

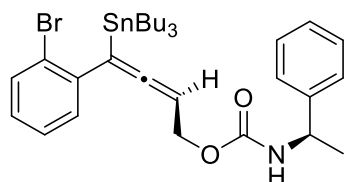

Colorless oil (82% *ee*).  $^1\text{H}$  NMR (400 MHz,  $\text{CDCl}_3$ ):  $\delta = 7.57-7.55$  (m, 1H), 7.36-7.23 (m, 6H), 7.16-7.14 (m, 1H), 7.06-7.02 (m, 1H), 5.05-4.89 (m, 3H), 4.69-4.67 (m, 2H), 1.57-1.46 (m, 9H), 1.36-1.27 (m, 6H), 1.13-1.00 (m, 6H), 0.90 (t,  $J = 7.2$  Hz, 9H);  $^{13}\text{C}$  NMR (101 MHz,  $\text{CDCl}_3$ ):  $\delta = 202.3, 155.6, 143.6, 139.8, 132.5, 129.6, 128.6, 127.5, 127.3, 127.2, 126.0, 122.5, 98.7, 78.5, 68.3, 50.6, 28.8, 27.2, 22.5, 13.7, 12.0$ ; HRMS (M/Z, ESI) Calcd. for  $\text{C}_{31}\text{H}_{44}\text{BrNO}_2\text{Sn}$  [M+Na]: 684.1475, Found: 684.1480; HPLC analysis: Daicel Chiralpak OD-H, hexane/iso-propanol = 50:

1, 1.0 ml/min,  $\lambda = 254$  nm, retention time: 9.18 min (major) and 19.23 min (minor).

(*S*)-4-(2-methoxyphenyl)-4-(tributylstannyl)buta-2,3-dien-1-ol (**2n**)

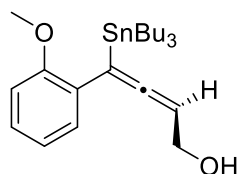

Colorless oil (69 mg, 74% yield, 97% ee).  $^1\text{H NMR}$  (400 MHz,  $\text{CDCl}_3$ ):  $\delta = 7.25$ -7.23 (m, 1H), 7.20-7.16 (m, 1H), 6.95-6.91 (m, 1H), 6.84 (d,  $J = 8.2$  Hz, 1H), 5.17 (tt,  $J = 6.5, 6.4$  Hz, 1H), 4.22-4.21 (m, 2H), 3.82 (s, 3H), 1.54-1.40 (m, 7H), 1.33-1.28 (m, 6H), 1.13-0.95 (m, 6H), 0.88 (t,  $J = 7.3$  Hz, 9H);  $^{13}\text{C NMR}$  (101 MHz,  $\text{CDCl}_3$ ):  $\delta = 202.5, 155.4, 129.4, 127.5, 127.0, 121.0, 110.1, 95.3, 83.5, 61.5, 54.95, 28.9, 27.3, 13.7, 11.5$ ; HRMS (M/Z, ESI) Calcd. for  $\text{C}_{23}\text{H}_{38}\text{O}_2\text{Sn}$  [M+Na]: 489.1791, Found: 489.1791; HPLC analysis: Daicel Chiralpak OZ-H, hexane/iso-propanol = 50: 1, 0.5 ml/min,  $\lambda = 254$  nm, retention time: 10.26 min (minor) and 13.41 min (major); Optical Rotation:  $[\alpha]_{\text{D}}^{25} -40.6$  (c 0.34,  $\text{CHCl}_3$ )

(*S*)-4-(*o*-tolyl)-4-(tributylstannyl)buta-2,3-dien-1-ol (**2o**)

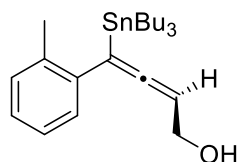

Colorless oil (55 mg, 62% yield).  $^1\text{H NMR}$  (400 MHz,  $\text{CDCl}_3$ ):  $\delta = 7.16$ -7.06 (m, 3H), 6.99-6.97 (m, 1H), 4.99 (tt,  $J = 6.8, 6.8$  Hz, 1H), 4.19 (t,  $J = 5.6$  Hz, 2H), 2.35 (s, 3H), 1.57-1.44 (m, 6H), 1.33-1.28 (m, 7H), 1.05-0.99 (m, 6H), 0.91 (t,  $J = 7.3$  Hz, 9H);  $^{13}\text{C NMR}$  (101 MHz,  $\text{CDCl}_3$ ):  $\delta = 200.6, 137.9, 134.8, 130.2, 127.96, 125.8, 97.2, 81.6, 61.9, 28.8, 27.2, 20.8, 13.7, 11.3$ ; HRMS (M/Z, ESI) Calcd. for  $\text{C}_{23}\text{H}_{38}\text{OSn}$  [M+Na]: 473.1842, Found: 473.1840; Optical Rotation:  $[\alpha]_{\text{D}}^{25} -52.3$  (c 1.25,  $\text{CHCl}_3$ ); The ee value of **2o** was determined by chiral HPLC analysis after derivatization to **2o'**.

(*S*)-4-(*o*-tolyl)-4-(tributylstannyl)buta-2,3-dien-1-yl ((*R*)-1-phenylethyl)carbamate (**2o'**)

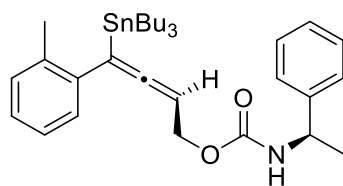

Colorless oil (91 % ee).  $^1\text{H NMR}$  (400 MHz,  $\text{CDCl}_3$ ):  $\delta = 7.39$ -7.28 (m, 5H), 7.19-7.09 (m, 3H), 7.01-6.99 (m, 1H), 4.99-4.89 (m, 3H), 4.69-4.63 (m, 2H), 2.36 (s, 3H), 1.59-1.42 (m, 9H), 1.37-1.28 (m, 6H), 1.12-0.97 (m, 6H), 0.93-0.89 (m, 9H);  $^{13}\text{C NMR}$  (101 MHz,  $\text{CDCl}_3$ ):  $\delta = 201.6, 155.7, 143.6, 137.5, 135.0, 130.3, 128.6, 128.0, 127.3, 126.0, 125.8, 96.4, 77.2, 64.3, 50.6, 28.8, 27.2, 22.5, 20.8, 13.7, 11.3$ ; HRMS (M/Z, ESI) Calcd. for  $\text{C}_{32}\text{H}_{47}\text{NO}_2\text{Sn}$  [M+Na]: 620.2526, Found: 620.2533; HPLC analysis: Daicel Chiralpak OD-H, hexane/iso-propanol = 50: 1, 1.0 ml/min,  $\lambda = 254$  nm, retention time: 5.79 min (major) and 7.28 min (minor).

(*S*)-4-(3-methoxyphenyl)-4-(tributylstannyl)buta-2,3-dien-1-ol (**2p**)



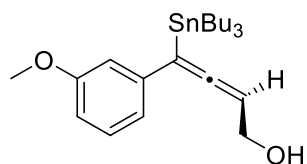

Colorless oil (84.5 mg, 91% yield, 95% *ee*). **<sup>1</sup>H NMR (400 MHz, CDCl<sub>3</sub>):**  $\delta$  = 7.23 (t, *J* = 8.0 Hz, 1H), 6.84-6.81 (m, 2H), 6.77-6.75 (m, 1H), 5.25 (tt, *J* = 6.7, 6.6 Hz, 1H), 4.27-4.17 (m, 2H), 3.82 (s, 3H), 1.59-1.42 (m, 7H), 1.39-1.29 (m, 6H), 1.17-1.00 (m, 6H), 0.90 (t, *J* = 7.3 Hz, 9H); **<sup>13</sup>C NMR (101 MHz, CDCl<sub>3</sub>):**  $\delta$  = 202.8, 159.8, 139.7, 129.4, 120.4, 113.3, 111.96, 98.97, 84.8, 65.6, 55.2, 28.9, 27.2, 13.7, 11.2; **HRMS (M/Z, ESI)** Calcd. for C<sub>23</sub>H<sub>38</sub>O<sub>2</sub>Sn [M+Na]: 489.1791, Found: 489.1793; **HPLC analysis:** Daicel Chiralpak IC, hexane/iso-propanol = 50: 1, 0.5 ml/min,  $\lambda$  = 254 nm, retention time: 13.56 min (minor) and 15.25 min (major); Optical Rotation:  $[\alpha]_D^{25}$  -24.9 (c 1.53, CHCl<sub>3</sub>)

(*S*)-4-(*m*-tolyl)-4-(tributylstannyl)buta-2,3-dien-1-ol (**2q**)

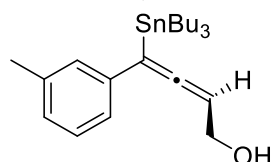

Colorless oil (66mg, 73% yield, 94% *ee*). **<sup>1</sup>H NMR (400 MHz, CDCl<sub>3</sub>):**  $\delta$  = 7.22-7.18 (m, 1H), 7.07 (s, 1H), 7.03-7.01 (m, 2H), 5.24 (tt, *J* = 6.6, 6.6 Hz, 1H), 4.27-4.18 (m, 2H), 2.35 (s, 3H), 1.61-1.45 (m, 6H), 1.40-1.28 (m, 7H), 1.17-1.00 (m, 6H), 0.90 (t, *J* = 7.3 Hz, 9H); **<sup>13</sup>C NMR (101 MHz, CDCl<sub>3</sub>):**  $\delta$  = 202.6, 138.1, 138.0, 128.5, 128.4, 127.2, 124.9, 99.0, 84.7, 61.7, 28.9, 27.2, 21.4, 13.7, 11.2; **HRMS (M/Z, ESI)** Calcd. for C<sub>23</sub>H<sub>38</sub>OSn [M+Na]: 473.1842, Found: 473.1841; **HPLC analysis:** Daicel Chiralpak OZ-H, hexane/iso-propanol = 500: 1, 0.5 ml/min,  $\lambda$  = 254 nm, retention time: 16.22 min (minor) and 23.57 min (major); Optical Rotation:  $[\alpha]_D^{25}$  -30.7 (c 0.60, CHCl<sub>3</sub>)

(*S*)-4-(naphthalen-2-yl)-4-(tributylstannyl)buta-2,3-dien-1-ol (**2r**)

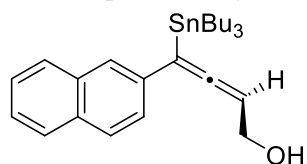

Colorless oil (87mg, 94% yield, 90% *ee*). **<sup>1</sup>H NMR (400 MHz, CDCl<sub>3</sub>):**  $\delta$  = 7.83-7.78 (m, 3H), 7.56 (br s, 1H), 7.52-7.43 (m, 3H), 5.34 (tt, *J* = 6.8, 6.8 Hz, 1H), 4.33-4.23 (m, 2H), 1.65-1.56 (m, 6H), 1.46 (t, *J* = 6.0 Hz, 1H, OH), 1.41-1.32 (m, 6H), 1.22-1.08 (m, 6H), 0.92 (t, *J* = 7.2 Hz, 9H); **<sup>13</sup>C NMR (101 MHz, CDCl<sub>3</sub>):**  $\delta$  = 203.4, 135.6, 133.7, 133.2, 128.1, 127.7, 127.6, 126.4, 126.3, 126.1, 125.5, 99.3, 85.2, 61.6, 28.98, 27.2, 13.7, 11.3; **HRMS (M/Z, ESI)** Calcd. for C<sub>26</sub>H<sub>38</sub>OSn [M+Na]: 509.1842, Found: 509.1852; **HPLC analysis:** Daicel Chiralpak OD-H, hexane/iso-propanol = 100: 1, 1.0 ml/min,  $\lambda$  = 254 nm, retention time: 7.80 min (minor) and 9.21 min (major); Optical Rotation:  $[\alpha]_D^{25}$  -9.1 (c 3.55, CHCl<sub>3</sub>)

(*S*)-4-(thiophen-3-yl)-4-(tributylstannyl)buta-2,3-dien-1-ol (**2s**)

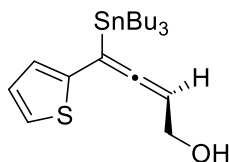

Colorless oil (75mg, 85% yield, 94% ee). **<sup>1</sup>H NMR (400 MHz, CDCl<sub>3</sub>):**  $\delta$  = 7.28-7.26 (m, 1H), 7.09-7.08 (m, 1H), 6.95 (d,  $J$  = 2.0 Hz, 1H), 5.22 (tt,  $J$  = 6.6, 6.6 Hz, 1H), 4.26-4.16 (m, 2H), 1.65-1.46 (m, 7H), 1.40-1.29 (m, 6H), 1.20-1.02 (m, 6H), 0.90 (t,  $J$  = 7.3 Hz, 9H); **<sup>13</sup>C NMR (101 MHz, CDCl<sub>3</sub>):**  $\delta$  = 203.2, 138.9, 127.5, 125.4, 120.7, 92.8, 84.6, 61.6, 28.9, 27.2, 13.7, 11.0; **HRMS (M/Z, ESI)** Calcd. for C<sub>20</sub>H<sub>34</sub>SOSn [M+Na]: 465.1250, Found: 465.1244; **HPLC analysis:** Daicel Chiralpak IC, hexane/iso-propanol = 50: 1, 1.0 ml/min,  $\lambda$  = 254 nm, retention time: 23.17 min (minor) and 25.82 min (major); Optical Rotation:  $[\alpha]_D^{25}$  -35.3 (c 2.38, CHCl<sub>3</sub>)

(S)-4-(benzo[b]thiophen-2-yl)-4-(tributylstannyl)buta-2,3-dien-1-ol (**2t**)

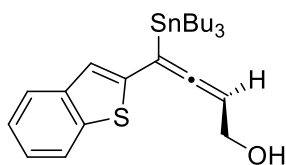

Colorless oil (90 mg, 91% yield, 92% ee). **<sup>1</sup>H NMR (400 MHz, CDCl<sub>3</sub>):**  $\delta$  = 8.21-8.19 (m, 1H), 7.87-7.85 (m, 1H), 7.47-7.36 (m, 2H), 7.06 (s, 1H), 5.24 (tt,  $J$  = 6.6, 6.5 Hz, 1H), 4.34-4.25 (m, 2H), 1.60-1.48 (m, 6H), 1.43 (t,  $J$  = 6.0 Hz, 1H, OH), 1.39-1.30 (m, 6H), 1.20-1.03 (m, 6H), 0.90 (t,  $J$  = 7.3 Hz, 9H); **<sup>13</sup>C NMR (101 MHz, CDCl<sub>3</sub>):**  $\delta$  = 202.4, 140.3, 138.2, 132.5, 124.5, 124.1, 123.3, 122.8, 122.4, 91.6, 83.4, 61.9, 28.9, 27.2, 13.7, 11.3; **HRMS (M/Z, ESI)** Calcd. for C<sub>24</sub>H<sub>36</sub>SOSn [M+Na]: 515.1407, Found: 515.1413; **HPLC analysis:** Daicel Chiralpak OZ-H, hexane/iso-propanol = 50: 1, 1.0 ml/min,  $\lambda$  = 254 nm, retention time: 5.58 min (minor) and 6.10 min (major); Optical Rotation:  $[\alpha]_D^{25}$  -8.6 (c 5.20, CHCl<sub>3</sub>)

(S)-6-phenyl-4-(tributylstannyl)hexa-2,3-dien-1-ol (**2u**)

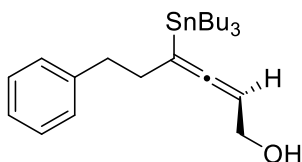

Colorless oil (74 mg, 79% yield, 94% ee). **<sup>1</sup>H NMR (400 MHz, CDCl<sub>3</sub>):**  $\delta$  = 7.34-7.28 (m, 2H), 7.23-7.21 (m, 3H), 4.95-4.84 (m, 1H), 4.08-3.92 (m, 2H), 2.87-2.74 (m, 2H), 2.50-2.39 (m, 2H), 1.61-1.46 (m, 6H), 1.39-1.30 (m, 6H), 1.07 (t,  $J$  = 6.0 Hz, 1H, OH), 1.01-0.91 (m, 15H); **<sup>13</sup>C NMR (101 MHz, CDCl<sub>3</sub>):**  $\delta$  = 200.8, 142.0, 128.5, 128.3, 125.9, 94.8, 83.3, 62.0, 35.9, 33.9, 29.0, 27.3, 13.7, 10.3; **HRMS (M/Z, ESI)** Calcd. for C<sub>24</sub>H<sub>40</sub>OSn [M+Na]: 487.1999, Found: 487.1996; **HPLC analysis:** Daicel Chiralpak OZ-H, hexane/iso-propanol = 500: 1, 1.0 ml/min,  $\lambda$  = 254 nm, retention time: 11.65 min (minor) and 13.61 min (major); Optical Rotation:  $[\alpha]_D^{25}$  -66.1 (c 1.76, CHCl<sub>3</sub>)

(S)-7-phenyl-4-(tributylstannyl)hepta-2,3-dien-1-ol (**2v**)

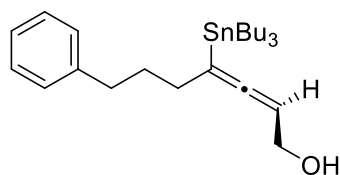

Colorless oil (78 mg, 82% yield). **<sup>1</sup>H NMR (400 MHz, CDCl<sub>3</sub>):**  $\delta$  = 7.32-7.28 (m, 2H), 7.22-7.19 (m, 2H), 4.97-4.88 (m, 1H), 4.12 (brs, 2H), 2.68 (d,  $J$  = 8 Hz, 2H), 2.19-2.15 (m, 2H), 1.84-1.77 (m, 2H), 1.60-1.45 (m, 6H), 1.39-1.30 (m, 7H), 1.04-0.91 (m, 15H); **<sup>13</sup>C NMR (101 MHz, CDCl<sub>3</sub>):**  $\delta$  = 200.4, 142.3, 128.5, 128.3, 125.7, 95.2, 82.9, 62.1, 35.4, 33.9, 33.5, 29.0, 27.3, 13.7, 10.3; **HRMS (M/Z, ESI)** Calcd. for C<sub>25</sub>H<sub>42</sub>OSn [M+Na]: 501.2155, Found: 501.2142; Optical Rotation:  $[\alpha]_D^{25}$  -57.2 (c 4.57, CHCl<sub>3</sub>). The *ee* value of **2v** was determined by chiral HPLC analysis after derivatization to **2v'**.

(*S*)-7-phenyl-4-(tributylstannyl)hepta-2,3-dien-1-yl ((*R*)-1-phenylethyl)carbamate (**2v'**)

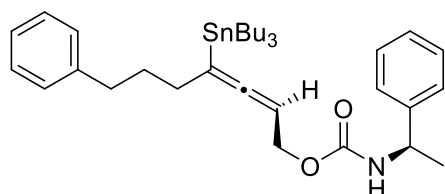

Colorless oil (96% *ee*). **<sup>1</sup>H NMR (400 MHz, CDCl<sub>3</sub>):**  $\delta$  = 7.38-7.26 (m, 7H), 7.22-7.18 (m, 3H), 4.90-4.82 (m, 3H), 4.56-4.54 (m, 2H), 2.68 (t,  $J$  = 7.6 Hz, 2H), 2.18-2.14 (m, 2H), 1.84-1.77 (m, 2H), 1.57-1.42 (m, 9H), 1.38-1.29 (m, 6H), 1.06-0.90 (m, 15H); **<sup>13</sup>C NMR (101 MHz, CDCl<sub>3</sub>):**  $\delta$  = 201.8, 155.7, 143.7, 142.4, 128.6, 128.5, 128.3, 127.3, 125.9, 125.7, 94.1, 78.3, 65.0, 50.6, 35.4, 31.6, 31.4, 29.0, 27.3, 22.5, 13.7, 10.3; **HPLC analysis:** Daicel Chiralpak OZ-H, hexane/iso-propanol = 250: 1, 1.0 ml/min,  $\lambda$  = 254 nm, retention time: 17.475 min (major) and 19.222 min (minor).

(*S*)-8-chloro-4-(tributylstannyl)octa-2,3-dien-1-ol (**2w**)

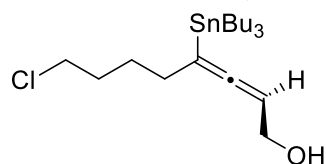

Colorless oil (75 mg, 83% yield, 88% *ee*). **<sup>1</sup>H NMR (400 MHz, CDCl<sub>3</sub>):**  $\delta$  = 4.96-4.84 (m, 1H), 4.14-4.04 (m, 2H), 3.56 (t,  $J$  = 6.8 Hz, 2H); 2.19-2.10 (m, 2H), 1.90-1.80 (m, 2H), 1.65-1.60 (m, 2H), 1.57-1.46 (m, 6H), 1.38-1.27 (m, 7H), 0.99-0.90 (m, 15H); **<sup>13</sup>C NMR (101 MHz, CDCl<sub>3</sub>):**  $\delta$  = 200.5, 94.9, 83.0, 62.1, 44.9, 32.1, 31.6, 29.0, 27.3, 26.9, 13.7, 10.3; **HRMS (M/Z, ESI)** Calcd. for C<sub>20</sub>H<sub>39</sub>ClOSn [M+Na]: 473.1609, Found: 473.1607; **HPLC analysis:** Daicel Chiralpak IC, hexane/iso-propanol = 50: 1, 1.0 ml/min,  $\lambda$  = 254 nm, retention time: 28.05 min (minor) and 29.35 min (major); Optical Rotation:  $[\alpha]_D^{25}$  -67.2 (c 1.89, CHCl<sub>3</sub>).

(*S*)-7-hydroxy-4-(tributylstannyl)hepta-4,5-dien-1-yl 4-methylbenzenesulfonate (**2x**)

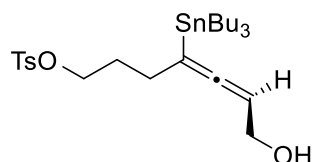

Colorless oil (103 mg, 90% yield). **<sup>1</sup>H NMR (400 MHz, CDCl<sub>3</sub>):**  $\delta$  = 7.81 (d,  $J$  = 8.2 Hz, 2H), 7.36 (d,  $J$  = 8.0 Hz, 2H), 4.89-4.86 (m, 1H), 4.10-4.03 (m, 4H), 2.47 (s, 3H), 2.13-2.10 (m, 2H), 1.89-1.80 (m, 2H), 1.58-1.41 (m, 7H), 1.36-1.28 (m, 6H), 1.08-0.86 (m, 15H); **<sup>13</sup>C NMR (101 MHz, CDCl<sub>3</sub>):**  $\delta$  = 200.4, 144.7, 133.2, 129.8, 127.9, 93.8, 83.7, 69.9, 61.9, 28.9, 28.6, 27.8, 27.3, 21.6, 13.7, 10.2; **HRMS (M/Z, ESI)** Calcd. for C<sub>26</sub>H<sub>44</sub>O<sub>4</sub>Sn [M+Na]: 595.1880, Found: 595.1919; Optical Rotation:  $[\alpha]_D^{25}$  -54.9 (c 6.29, CHCl<sub>3</sub>); The *ee* value of **2x** was determined by chiral HPLC analysis after derivatization to **2x'**.

(*S*)-7-(((*R*)-1-phenylethyl)carbamoyloxy)-4-(tributylstannyl)hepta-4,5-dien-1-yl-4-methylbenzenesulfonate (**2x'**)

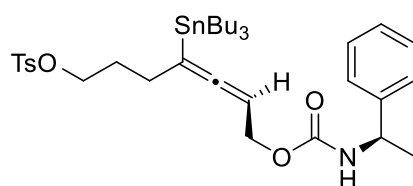

Colorless oil (92% *ee*). **<sup>1</sup>H NMR (400 MHz, CDCl<sub>3</sub>):**  $\delta$  = 7.81-7.78 (m, 2H), 7.36-7.26 (m, 7H), 5.11 (s, 1H), 4.85-4.78 (m, 2H), 4.49-4.41 (m, 2H), 4.11-4.08 (m, 2H), 2.46 (s, 3H), 2.12-2.08 (m, 2H), 1.84-1.82 (m, 2H), 1.56-1.41 (m, 9H), 1.35-1.26 (m, 6H), 1.01-0.86 (m, 15H); **<sup>13</sup>C NMR (101 MHz, CDCl<sub>3</sub>):**  $\delta$  = 201.5, 155.7, 144.7, 143.8, 133.2, 129.8, 128.6, 127.9, 127.2, 125.9, 93.1, 79.2, 70.0, 64.4, 50.7, 28.9, 28.5, 27.5, 27.2, 22.5, 21.6, 13.7, 10.2; **HRMS (M/Z, ESI)** Calcd. for C<sub>35</sub>H<sub>53</sub>NO<sub>5</sub>SSn [M+Na]: 742.2564, Found: 742.2584; **HPLC analysis:** Daicel Chiralpak OD-H, hexane/iso-propanol = 20: 1, 1.0 ml/min,  $\lambda$  = 254 nm, retention time: 8.62 min (major) and 12.89 min (minor).

(*S*)-5-(benzyloxy)-4-(tributylstannyl)penta-2,3-dien-1-ol (**2y**)

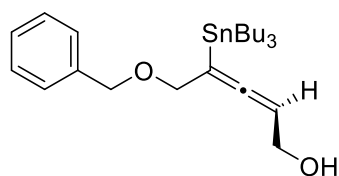

Colorless oil (75 mg, 78% yield, 95% *ee*). **<sup>1</sup>H NMR (400 MHz, CDCl<sub>3</sub>):**  $\delta$  = 7.38-7.30 (m, 5H), 5.06-4.95 (m, 1H), 4.53 (s, 2H), 4.19-4.11 (m, 4H), 1.61-1.48 (m, 6H), 1.43 (t,  $J$  = 6.2 Hz, 1H, OH), 1.38-1.27 (m, 6H), 1.07-0.97 (m, 6H), 0.90 (t,  $J$  = 7.3 Hz, 9H); **<sup>13</sup>C NMR (101 MHz, CDCl<sub>3</sub>):**  $\delta$  = 200.1, 138.2, 128.3, 127.8, 127.6, 95.1, 83.6, 72.1, 70.9, 61.7, 29.0, 27.3, 13.7, 10.6; **HRMS (M/Z, ESI)** Calcd. for C<sub>24</sub>H<sub>40</sub>O<sub>2</sub>Sn [M+Na]: 503.1948, Found: 503.1948; **HPLC analysis:** Daicel Chiralpak OZ-H, hexane/iso-propanol = 100: 1, 1.0 ml/min,  $\lambda$  = 254 nm, retention time: 8.75 min (minor) and 11.89 min (major); Optical Rotation:  $[\alpha]_D^{25}$  -50.9 (c 2.12, CHCl<sub>3</sub>).

(*S*)-7-hydroxy-4-(tributylstannyl)hepta-4,5-dienenitrile (**2z**)

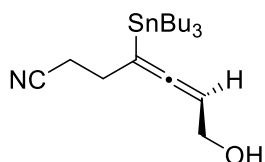

Colorless oil (80 mg, 71% yield, 85% ee). **<sup>1</sup>H NMR (400 MHz, CDCl<sub>3</sub>):**  $\delta$  = 5.13-5.04 (m, 1H), 4.18-4.12 (m, 2H), 2.60-2.52 (m, 2H), 2.49-2.33 (m, 2H), 1.59-1.44 (m, 6H), 1.38-1.27 (m, 6H), 1.08-1.00 (m, 6H), 0.92 (t,  $J$  = 7.3 Hz, 9H); **<sup>13</sup>C NMR (101 MHz, CDCl<sub>3</sub>):**  $\delta$  = 200.8, 120.1, 92.5, 85.8, 61.7, 28.9, 27.5, 27.3, 17.0, 16.7, 10.3; **HRMS (M/Z, ESI)** Calcd. for C<sub>19</sub>H<sub>35</sub>NOSn [M+Na]: 436.1638, Found: 436.1638; **HPLC analysis:** Daicel Chiralpak OD-H, hexane/iso-propanol = 20: 1, 1.0 ml/min,  $\lambda$  = 254 nm, retention time: 13.70 min (minor) and 14.83 min (major); Optical Rotation:  $[\alpha]_D^{25}$  -100.4 (c 1.14, CHCl<sub>3</sub>).

(*S*)-5-hydroxy-2-(tributylstannyl)penta-2,3-dien-1-yl furan-2-carboxylate (**2aa**)

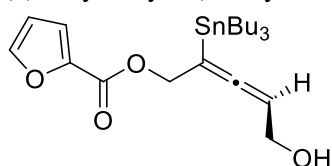

Colorless oil (54 mg, 53% yield, 90% ee). **<sup>1</sup>H NMR (400 MHz, CDCl<sub>3</sub>):**  $\delta$  = 7.60-7.59 (m, 1H), 7.21-7.20 (m, 1H), 6.54-6.53 (m, 1H), 5.12-5.01 (m, 1H), 4.96-4.89 (m, 2H), 4.10 (t,  $J$  = 5.7 Hz, 2H), 1.62-1.45 (m, 7H), 1.36-1.27 (m, 6H), 1.11-0.96 (m, 6H), 0.90 (t,  $J$  = 7.3 Hz, 9H); **<sup>13</sup>C NMR (101 MHz, CDCl<sub>3</sub>):**  $\delta$  = 201.5, 158.5, 146.4, 144.6, 118.1, 111.9, 92.7, 85.2, 65.7, 61.1, 28.9, 27.2, 13.6, 10.5; **HRMS (M/Z, ESI)** Calcd. for C<sub>22</sub>H<sub>36</sub>O<sub>4</sub>Sn [M+H]: 485.1708, Found: 535.1722; **HPLC analysis:** Daicel Chiralpak OZ-H, hexane/iso-propanol = 50: 1, 1.0 ml/min,  $\lambda$  = 254 nm, retention time: 17.91 min (minor) and 20.87 min (major); Optical Rotation:  $[\alpha]_D^{25}$  -91.8 (c 2.35, CHCl<sub>3</sub>).

(*S*)-7-hydroxy-4-(tributylstannyl)hepta-4,5-dien-1-yl benzofuran-2-carboxylate (**2ab**)

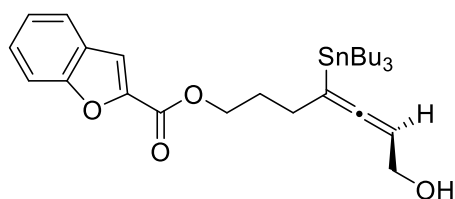

Colorless oil (80mg, 71% yield, 91% ee). **<sup>1</sup>H NMR (400 MHz, CDCl<sub>3</sub>):**  $\delta$  = 7.70 (d,  $J$  = 7.8 Hz, 1H), 7.60 (d,  $J$  = 8.4 Hz, 1H), 7.55 (s, 1H), 7.47 (t,  $J$  = 7.4 Hz, 1H), 7.32 (t,  $J$  = 7.4 Hz, 1H), 5.00-4.90 (m, 1H), 4.52-4.39 (m, 2H), 4.13 (brs, 2H), 2.32-2.21 (m, 2H), 2.05-1.97 (m, 2H), 1.65 (brs, 1H, OH), 1.57-1.44 (m, 6H), 1.39-1.27 (m, 6H), 1.07-0.97 (m, 6H), 0.90 (t,  $J$  = 7.3 Hz, 9H); **<sup>13</sup>C NMR (101 MHz, CDCl<sub>3</sub>):**  $\delta$  = 200.6, 159.7, 155.7, 145.6, 127.6, 127.0, 123.8, 122.8, 113.9, 112.4, 94.1, 83.7, 64.8, 62.1, 29.0, 28.5, 28.4, 27.3, 13.7, 10.3; **HRMS (M/Z, ESI)** Calcd. for C<sub>28</sub>H<sub>42</sub>O<sub>2</sub>Sn [M+Na]: 585.2003, Found: 585.2007; **HPLC analysis:** Daicel Chiralpak OD-H, hexane/iso-propanol = 20: 1, 1.0 ml/min,  $\lambda$  = 254 nm, retention time: 13.70 min (minor) and 14.83 min (major); Optical Rotation:  $[\alpha]_D^{25}$  -53.6 (c 2.44, CHCl<sub>3</sub>).

(*S*)-5-hydroxy-2-(tributylstannyl)penta-2,3-dien-1-yl thiophene-2-carboxylate (**2ac**)

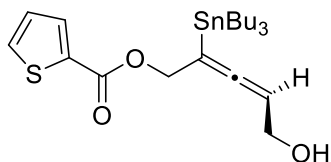

Colorless oil (60 mg, 60% yield, 88% *ee*). **<sup>1</sup>H NMR (400 MHz, CDCl<sub>3</sub>):**  $\delta$  = 7.84-7.83 (m, 1H), 7.59-7.58 (m, 1H), 7.14-7.12 (m, 1H), 5.11-5.02 (m, 1H), 4.96-4.89 (m, 2H), 4.13-4.07 (m, 2H), 1.67 (brs, 1H, OH), 1.60-1.45 (m, 6H), 1.41-1.27 (m, 6H), 1.12-0.96 (m, 6H), 0.90 (t, *J* = 7.3 Hz, 9H); **<sup>13</sup>C NMR (101 MHz, CDCl<sub>3</sub>):**  $\delta$  = 201.5, 162.0, 133.6, 132.5, 127.8, 92.8, 85.2, 65.96, 61.0, 28.9, 27.2, 13.7, 10.6; **HPLC analysis:** Daicel Chiralpak OZ-H, hexane/iso-propanol = 50: 1, 1.0 ml/min,  $\lambda$  = 254 nm, retention time: 12.68 min (minor) and 15.89 min (major); Optical Rotation:  $[\alpha]_D^{25}$  -63.1 (c 1.33, CHCl<sub>3</sub>).

(*S*)-8-hydroxy-5-(tributylstannyl)octa-5,6-dien-1-yl thiophene-2-carboxylate (**2ad**)

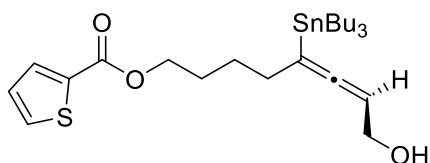

Colorless oil (76 mg, 70% yield, 91% *ee*). **<sup>1</sup>H NMR (400 MHz, CDCl<sub>3</sub>):**  $\delta$  = 7.83-7.81 (m, 1H), 7.57-7.56 (m, 1H), 7.13-7.11 (m, 1H), 4.95-4.86 (m, 1H), 4.34-4.31 (m, 2H), 4.11-4.08 (m, 2H), 2.22-2.16 (m, 2H), 1.84-1.77 (m, 2H), 1.64-1.59 (m, 2H), 1.54-1.48 (m, 6H), 1.43-1.40 (m, 1H, OH), 1.37-1.28 (m, 6H), 1.05-0.89 (m, 15H); **<sup>13</sup>C NMR (101 MHz, CDCl<sub>3</sub>):**  $\delta$  = 200.5, 162.4, 134.0, 133.3, 132.2, 127.7, 95.0, 83.0, 65.1, 62.1, 32.0, 29.0, 28.2, 27.3, 26.1, 13.7, 10.3; **HRMS (M/Z, ESI)** Calcd. for C<sub>25</sub>H<sub>42</sub>O<sub>3</sub>SSn [M+Na]: 565.1774, Found: 565.1778; **HPLC analysis:** Daicel Chiralpak OZ-H, hexane/iso-propanol = 50: 1, 1.0 ml/min,  $\lambda$  = 254 nm, retention time: 12.81 min (minor) and 13.94 min (major); Optical Rotation:  $[\alpha]_D^{25}$  -51.5 (c 1.93, CHCl<sub>3</sub>).

(*S*)-2-(5-hydroxy-2-(tributylstannyl)penta-2,3-dien-1-yl)isoindoline-1,3-dione (**2ae**)

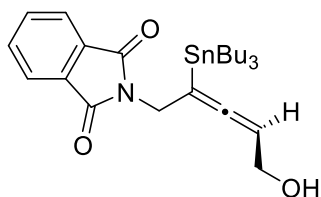

Colorless oil (68 mg, 66% yield, 92% *ee*). **<sup>1</sup>H NMR (400 MHz, CDCl<sub>3</sub>):**  $\delta$  = 7.87-7.85 (m, 2H), 7.74-7.72 (m, 2H), 4.96-4.91 (m, 1H), 4.40-4.33 (m, 2H), 3.94 (t, *J* = 6.4 Hz, 2H), 1.81 (t, *J* = 5.6 Hz, 1H, OH), 1.60-1.47 (m, 6H), 1.36-1.25 (m, 6H), 1.11-0.98 (m, 6H), 0.89 (t, *J* = 7.3 Hz, 9H); **<sup>13</sup>C NMR (101 MHz, CDCl<sub>3</sub>):**  $\delta$  = 201.2, 168.2, 134.0, 132.0, 123.3, 92.9, 86.7, 60.5, 40.1, 28.9, 27.2, 13.6, 10.4; **HRMS (M/Z, ESI)** Calcd. for C<sub>27</sub>H<sub>41</sub>O<sub>3</sub>NSn [M+Na]: 542.1693, Found: 542.1702; **HPLC analysis:** Daicel Chiralpak OZ-H, hexane/iso-propanol = 50: 1, 1.0 ml/min,  $\lambda$  = 254 nm, retention time: 25.06 min (minor) and 36.44 min (major); Optical Rotation:  $[\alpha]_D^{25}$  -153.1 (c 2.05, CHCl<sub>3</sub>).

(*S*)-2-(7-hydroxy-4-(tributylstannyl)hepta-4,5-dien-1-yl)isoindoline-1,3-dione (**2af**)

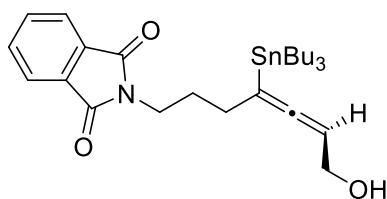

Colorless oil (83 mg, 73% yield, 92% *ee*).  $^1\text{H NMR}$  (400 MHz,  $\text{CDCl}_3$ ):  $\delta$  = 7.87-7.85 (m, 2H), 7.75-7.72(m, 2H), 5.99-4.97 (m, 1H), 4.17-4.13 (m, 2H), 3.88-3.67 (m, 2H), 2.42-2.39 (m, 2H), 2.00-1.83 (m, 2H), 1.56-1.43 (m, 6H), 1.37-1.28 (m, 6H), 1.06-0.89 (m, 15H);  $^{13}\text{C NMR}$  (101 MHz,  $\text{CDCl}_3$ ):  $\delta$  = 200.3, 168.5, 134.0, 132.1, 123.3, 93.6, 84.1, 62.3, 37.5, 29.2, 29.0, 28.0, 27.3, 13.7, 10.2; **HRMS (M/Z, ESI)** Calcd. for  $\text{C}_{27}\text{H}_{41}\text{O}_3\text{NSn}$  [M+Na]: 570.2006, Found: 570.2009; **HPLC analysis:** Daicel Chiralpak OD-H, hexane/iso-propanol = 50: 1, 1.0 ml/min,  $\lambda$ = 254 nm, retention time: 11.80 min (minor) and 12.81 min (major); Optical Rotation:  $[\alpha]_{\text{D}}^{25}$  -67.1 (c 2.50,  $\text{CHCl}_3$ ).

(*S*)-4-(4-methoxyphenyl)-2-phenyl-4-(tributylstannyl)buta-2,3-dien-1-ol (**2ag**)

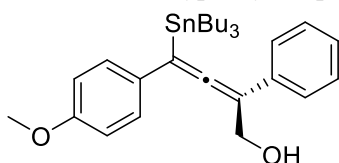

Colorless oil (61 mg, 56% yield, 84% *ee*).  $^1\text{H NMR}$  (400 MHz,  $\text{CDCl}_3$ ):  $\delta$  = 7.49-7.47 (m, 2H), 7.37-7.33 (m, 2H), 7.28-7.19 (m, 3H), 6.90 (d,  $J$  = 8.6 Hz, 2H), 4.75-4.61 (m, 2H), 3.84 (s, 3H), 1.64-1.61 (t,  $J$  = 6 Hz, 1H, OH), 1.59-1.52 (m, 6H), 1.37-1.28 (m, 6H), 1.18-1.04 (m, 6H), 0.88 (t,  $J$  = 7.3 Hz, 9H);  $^{13}\text{C NMR}$  (101 MHz,  $\text{CDCl}_3$ ):  $\delta$  = 201.7, 158.7, 135.8, 129.4, 129.2, 128.6, 126.1, 125.5, 114.2, 101.9, 100.3, 62.4, 55.4, 29.0, 27.3, 13.7, 11.5; **HRMS (M/Z, ESI)** Calcd. for  $\text{C}_{29}\text{H}_{42}\text{O}_2\text{Sn}$  [M+H]: 543.2280, Found: 543.2289; **HPLC analysis:** Daicel Chiralpak OZ-H, hexane/iso-propanol = 50: 1, 1.0 ml/min,  $\lambda$ = 254 nm, retention time: 7.33 min (major) and 9.74 min (minor); Optical Rotation:  $[\alpha]_{\text{D}}^{25}$  -57.6 (c 1.15,  $\text{CHCl}_3$ ).

(*S*)-2,6-diphenyl-4-(tributylstannyl)hexa-2,3-dien-1-ol (**2ah**)

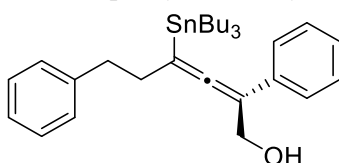

Colorless oil (58 mg, 54% yield, 91% *ee*).  $^1\text{H NMR}$  (400 MHz,  $\text{CDCl}_3$ ):  $\delta$  = 7.42-7.40 (m, 2H), 7.37-7.33 (m, 4H), 7.28-7.26 (m, 2H), 7.22-7.18 (m, 2H), 4.55-4.38 (m, 2H), 2.97-2.88 (m, 2H), 2.69-2.65 (m, 2H), 1.65-1.50 (m, 6H), 1.41-1.31 (m, 6H), 1.25 (t,  $J$  = 6 Hz, 1H, OH), 1.13-1.00 (m, 6H), 0.94 (t,  $J$  = 7.3 Hz, 9H);  $^{13}\text{C NMR}$  (101 MHz,  $\text{CDCl}_3$ ):  $\delta$  = 198.9, 141.7, 136.6, 128.5, 128.4, 128.4, 126.0, 125.6, 125.4, 98.5, 98.3, 62.7, 36.1, 34.0, 29.1, 27.4, 13.7, 10.8; **HRMS (M/Z, ESI)** Calcd. for  $\text{C}_{30}\text{H}_{44}\text{OSn}$  [M+Na]: 563.2312, Found: 563.2315; **HPLC analysis:** Daicel Chiralpak IC, hexane/iso-propanol = 500: 1, 1.0 ml/min,  $\lambda$ = 254 nm, retention time: 18.26 min (major) and 22.43 min (minor); Optical Rotation:  $[\alpha]_{\text{D}}^{25}$  -7.7 (c 1.00,  $\text{CHCl}_3$ ).

(*S*)-2-(4-methoxyphenyl)-6-phenyl-4-(tributylstannyl)hexa-2,3-dien-1-ol (**2ai**)

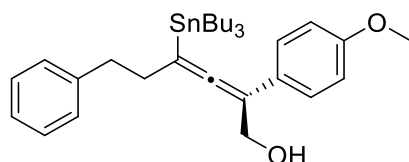

Colorless oil (57 mg, 50% yield, 89% *ee*). **<sup>1</sup>H NMR (400 MHz, CDCl<sub>3</sub>):**  $\delta$  = 7.33-7.27 (m, 4H), 7.24-7.21 (m, 3H), 6.87 (d, *J* = 8.8 Hz, 2H), 4.48-4.32 (m, 2H), 3.83 (s, 3H), 2.90-2.84 (m, 2H), 2.62-2.59 (m, 2H), 1.57-1.49 (m, 6H), 1.36-1.27 (m, 6H), 1.16 (t, *J* = 6 Hz, 1H, OH), 1.07-0.93 (m, 6H), 0.89 (t, *J* = 7.3 Hz, 9H); **<sup>13</sup>C NMR (101 MHz, CDCl<sub>3</sub>):**  $\delta$  = 198.9, 157.8, 141.8, 128.7, 128.5, 128.3, 126.4, 125.9, 114.0, 98.4, 98.2, 62.9, 55.3, 36.0, 34.1, 29.1, 27.4, 13.7, 10.7; **HRMS (M/Z, ESI) Calcd. for C<sub>31</sub>H<sub>46</sub>O<sub>2</sub>Sn [M+Na]:** 593.2417, Found: 593.2413; **HPLC analysis:** Daicel Chiralpak IC, hexane/iso-propanol = 50: 1, 1.0 ml/min,  $\lambda$  = 254 nm, retention time: 8.84 min (major) and 10.13 min (minor); Optical Rotation:  $[\alpha]_D^{25}$  -108.3 (c 2.89, CHCl<sub>3</sub>).

(*S*)-2-phenyl-4-(thiophen-3-yl)-4-(tributylstannyl)buta-2,3-dien-1-ol (**2aj**)

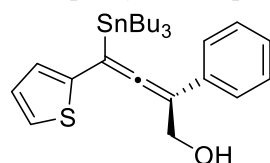

Colorless oil (64 mg, 62% yield, 82% *ee*). **<sup>1</sup>H NMR (400 MHz, CDCl<sub>3</sub>):**  $\delta$  = 7.46-7.44 (m, 2H), 7.36-7.28 (m, 3H), 7.21-7.18 (m, 1H), 7.11-7.10 (m, 1H), 7.00 (brs, 1H), 4.72-4.58 (m, 2H), 1.58-1.50 (m, 6H), 1.35-1.26 (m, 7H), 1.19-1.03 (m, 6H), 0.86 (t, *J* = 7.3 Hz, 9H); **<sup>13</sup>C NMR (101 MHz, CDCl<sub>3</sub>):**  $\delta$  = 202.6, 138.1, 135.6, 128.6, 127.7, 126.2, 125.7, 125.6, 121.4, 99.8, 96.3, 62.3, 29.0, 27.3, 13.6, 11.4; **HPLC analysis:** Daicel Chiralpak OZ-H, hexane/iso-propanol = 50: 1, 1.0 ml/min,  $\lambda$  = 254 nm, retention time: 5.30 min (major) and 7.50 min (minor); Optical Rotation:  $[\alpha]_D^{25}$  -108.7 (c 0.54, CHCl<sub>3</sub>).

(3*R*,5*S*)-4-(4-methoxyphenyl)-6-methylhepta-2,3-diene-1,5-diol (**3a**)

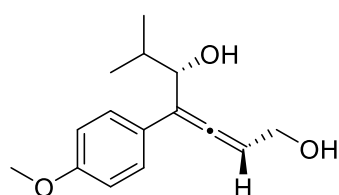

Colorless oil (47 mg, 63% yield, 96% *ee*, 4:1 dr). **<sup>1</sup>H NMR (400 MHz, CDCl<sub>3</sub>):**  $\delta$  = 7.35 (d, *J* = 8.8 Hz, 2H), 6.89 (d, *J* = 8.8 Hz, 2H), 5.88-5.85 (m, 1H), 4.41-4.39 (m, 1H), 4.29-4.22 (m, 2H), 3.82 (s, 3H), 2.03 (brs, OH, 1H), 1.97-1.88 (m, 1H), 1.00 (d, *J* = 6.4 Hz, 3H), 0.95 (d, *J* = 6.4 Hz, 3H); **<sup>13</sup>C NMR (101 MHz, CDCl<sub>3</sub>):**  $\delta$  = 201.4, 159.0, 128.3, 127.0, 114.0, 112.4, 97.2, 75.4, 60.7, 55.3, 31.9, 19.8, 16.5; **HRMS (M/Z, ESI) Calcd. for C<sub>15</sub>H<sub>20</sub>O<sub>3</sub> [M+Na]:** 271.1310, Found: 271.1308; **HPLC analysis:** Daicel Chiralpak IC, hexane/iso-propanol = 95: 5, 1.0 ml/min,  $\lambda$  = 254 nm, retention time: 21.66 min (major) and 37.38 min (minor).

(*S*)-4-(4-methoxyphenyl)-4-(tributylstannyl)buta-2,3-dien-1-yl acetate (**4aa**)



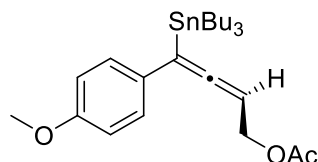

Colorless oil (99% yield). **<sup>1</sup>H NMR (400 MHz, CDCl<sub>3</sub>):**  $\delta$  = 7.17 (d,  $J$  = 8.4 Hz, 2H), 6.86 (d,  $J$  = 8.8 Hz, 2H), 5.17 (tt,  $J$  = 6.8, 8.0 Hz, 1H), 4.67-4.62 (m, 2H), 3.82 (s, 3H), 2.09 (s, 3H), 1.64-1.45 (m, 6H), 1.39-1.30 (m, 6H), 1.18-1.01 (m, 6H), 0.91 (t,  $J$  = 7.6 Hz, 9H); **<sup>13</sup>C NMR (101 MHz, CDCl<sub>3</sub>):**  $\delta$  = 203.5, 170.9, 158.4, 129.7, 129.0 (t,  $J$  = 9 Hz), 114.0, 97.6, 80.0, 63.8, 55.3, 28.9, 27.2, 21.1, 13.7, 11.1.

(3*R*, 5*S*)-5-hydroxy-4-(4-methoxyphenyl)-6-methylhepta-2,3-dien-1-yl acetate (**4a**)

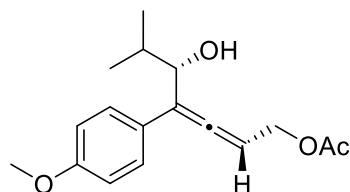

Colorless oil (56 mg, 55% yield, 96% *ee*). **<sup>1</sup>H NMR (400 MHz, CDCl<sub>3</sub>):**  $\delta$  = 7.32 (d,  $J$  = 8.8 Hz, 2H), 6.89 (d,  $J$  = 8.8 Hz, 2H), 5.81-5.77 (m, 1H), 4.76-4.66 (m, 2H), 4.42-4.39 (m, 1H), 3.82 (s, 3H), 2.11 (s, 3H), 1.96 (d,  $J$  = 7.2 Hz, OH, 1H), 1.93-1.87 (m, 1H), 1.01 (d,  $J$  = 6.8 Hz, 3H), 0.93 (d,  $J$  = 6.8 Hz, 3H); **<sup>13</sup>C NMR (101 MHz, CDCl<sub>3</sub>):**  $\delta$  = 203.1, 171.1, 159.1, 128.3, 126.7, 114.1, 112.4, 92.7, 75.1, 62.4, 55.3, 31.8, 21.0, 19.8, 16.1; **HRMS (M/Z, ESI)** Calcd. for C<sub>17</sub>H<sub>22</sub>O<sub>4</sub> [M+Na]: 313.1416, Found: 313.1412; **HPLC analysis:** Daicel Chiralpak AS-H, hexane/iso-propanol = 95: 5, 1.0 ml/min,  $\lambda$  = 254 nm, retention time: 10.77 min (minor) and 11.62 min (major); Optical Rotation:  $[\alpha]_D^{25}$  -62.7 (c 2.17, CHCl<sub>3</sub>).

(*R*)-4-(4-methoxyphenyl)-4-phenylbuta-2,3-dien-1-ol (**5a**)

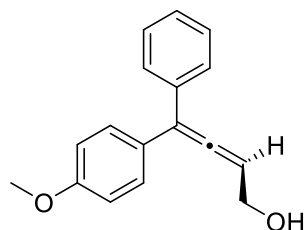

Colorless oil (47 mg, 53% yield, 60% *ee*). **<sup>1</sup>H NMR (400 MHz, CDCl<sub>3</sub>):**  $\delta$  = 7.38-7.36 (m, 4H), 7.32-7.28 (m, 3H), 6.92-6.90 (m, 2H), 5.90 (t,  $J$  = 6 Hz, 1H), 4.32 (t,  $J$  = 6.0 Hz, 2H), 3.85 (s, 3H), 1.67 (t,  $J$  = 6.4 Hz, OH, 1H); **<sup>13</sup>C NMR (101 MHz, CDCl<sub>3</sub>):**  $\delta$  = 204.0, 159.2, 136.6, 129.7, 128.5, 128.4, 127.5, 113.9, 112.2, 94.9, 60.8, 55.3; **HPLC analysis:** Daicel Chiralpak OJ-H, hexane/iso-propanol = 90: 10, 1.0 ml/min,  $\lambda$  = 254 nm, retention time: 18.53 min (major) and 23.84 min (minor).

# 11.NMR Spectra and HPLC chromatograms

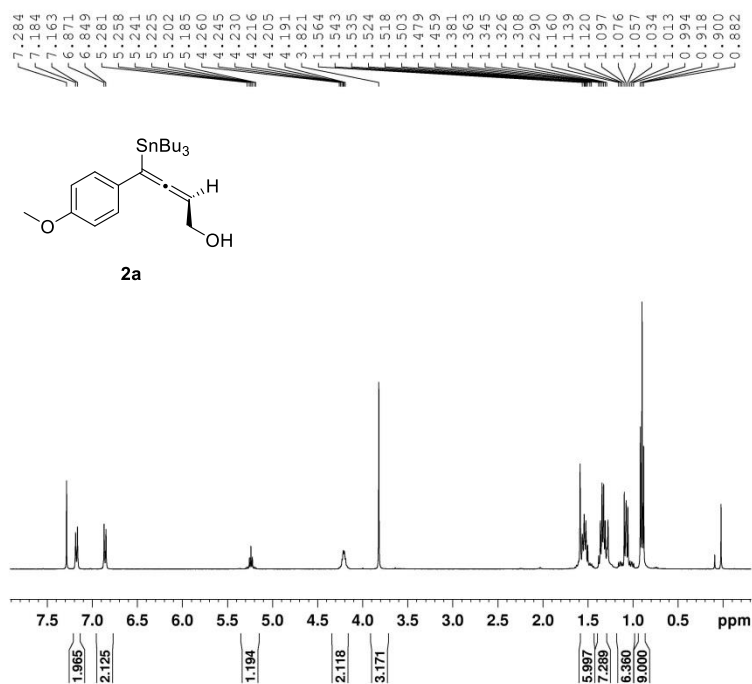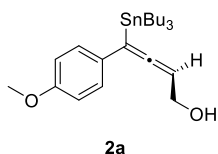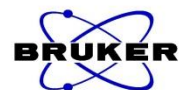

```

NAME      yj1-hk-259-1
EXPNO     10
PROCNO    1
Date_     20200902
Time      17.15
INSTRUM   spect
PROBHD    5 mm PABBO BB/
PULPROG   zg30
TD         65536
SOLVENT   CDCl3
NS         4
DS         0
SWH        8012.820 Hz
FIDRES     0.122266 Hz
AQ         4.0894966 sec
RG         78.29
DW         62.400 usec
DE         6.50 usec
TE         0.0 K
D1         1.0000000 sec
TDO        1
===== CHANNEL f1 =====
SF01      400.1324710 MHz
NUC1       1H
P1         9.99 usec
SI         65536
SF         400.1300000 MHz
WDW        EM
SSB        0
LB         0.30 Hz
GB         0
PC         1.00
    
```

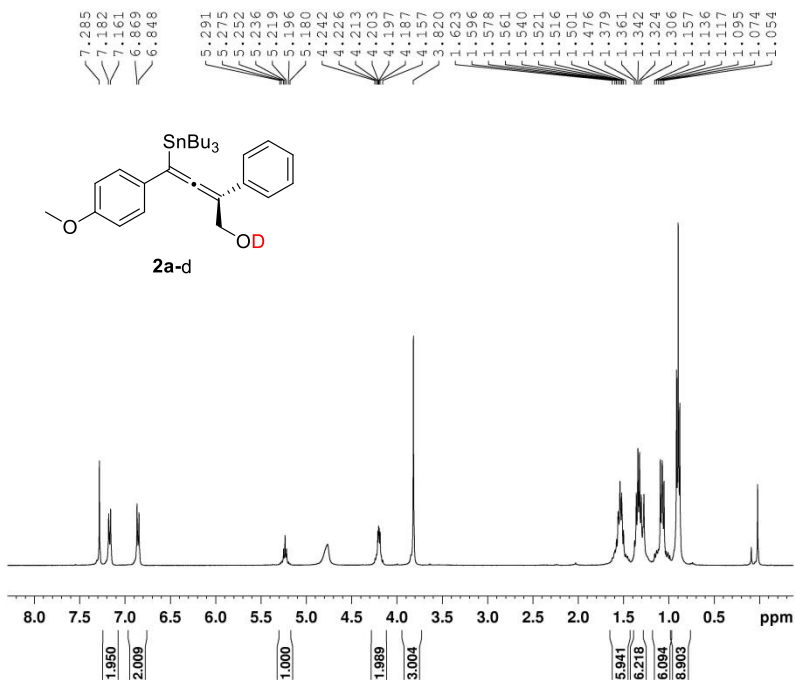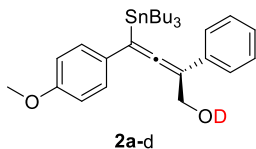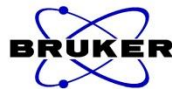

```

NAME      yj1-hk-259-1-d
EXPNO     10
PROCNO    1
Date_     20200902
Time      17.19
INSTRUM   spect
PROBHD    5 mm PABBO BB/
PULPROG   zg30
TD         65536
SOLVENT   CDCl3
NS         16
DS         0
SWH        8012.820 Hz
FIDRES     0.122266 Hz
AQ         4.0894966 sec
RG         78.29
DW         62.400 usec
DE         6.50 usec
TE         0.0 K
D1         1.0000000 sec
TDO        1
===== CHANNEL f1 =====
SF01      400.1324710 MHz
NUC1       1H
P1         9.99 usec
SI         65536
SF         400.1300000 MHz
WDW        EM
SSB        0
LB         0.30 Hz
GB         0
PC         1.00
    
```

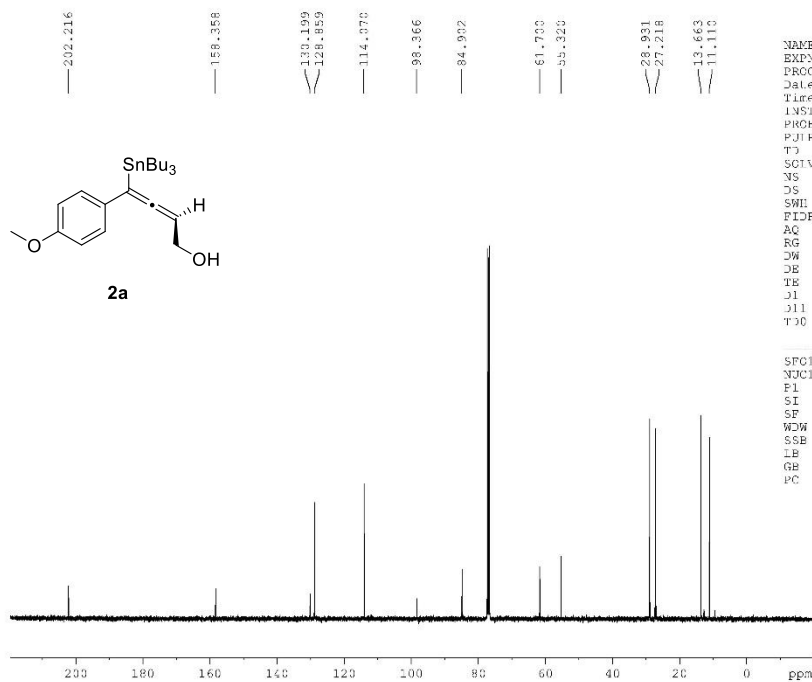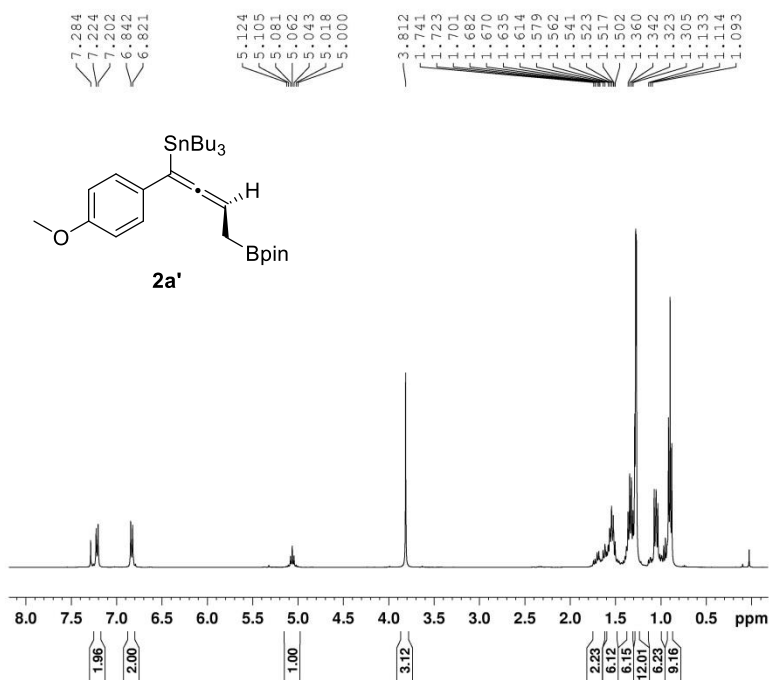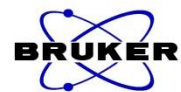

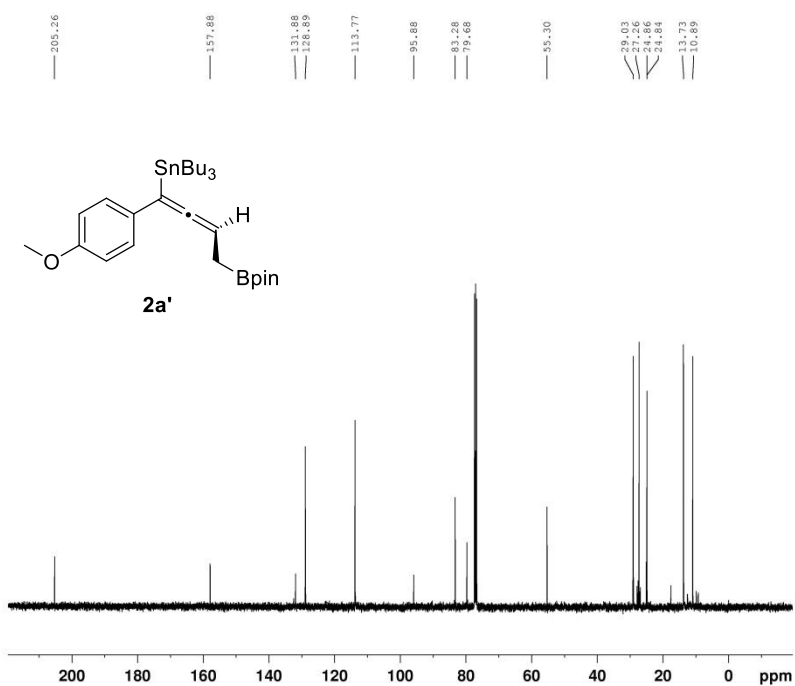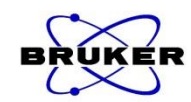

```

NAME      yj1-hk-529-c
EXPNO     11
PROCNO    1
Date_     20181204
Time      13.12
INSTRUM   spect
PROBHD    5 mm PABBO BB/
PULPROG   zgpg30
TD         65536
SOLVENT   CDCl3
NS         218
DS         4
SWH        24038.461 Hz
FIDRES     0.366798 Hz
AQ         1.3631988 sec
RG         197.54
DW         20.800 usec
DE         6.50 usec
TE         298.7 K
D1         2.00000000 sec
D11        0.03000000 sec
TD0        1

===== CHANNEL f1 =====
SF01      100.6228293 MHz
NUC1       13C
P1         9.31 usec
SI         32768
SF         100.6127685 MHz
WDW        EM
SSB        0
LB         1.00 Hz
GB         0
PC         1.40
  
```

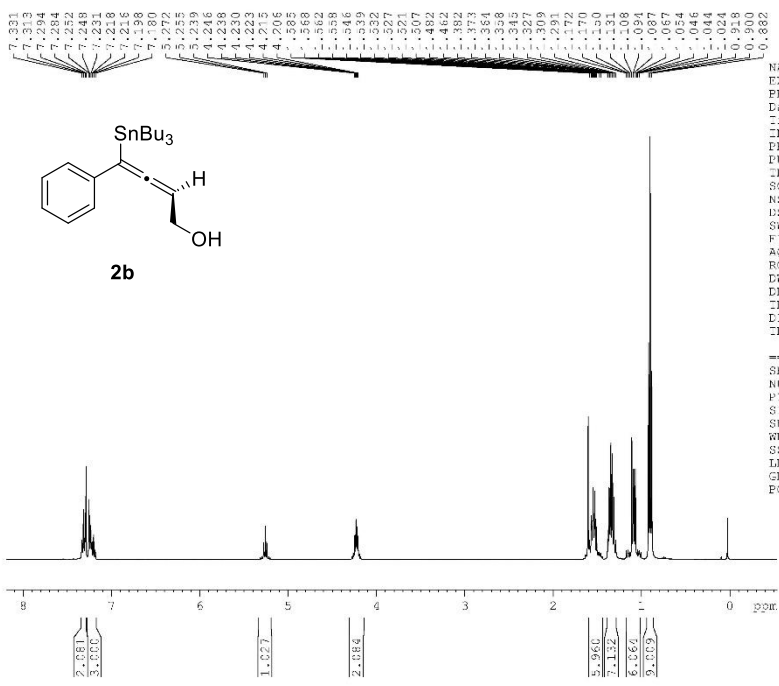

```

NAME      yj1-hk-199-h
EXPNO     10
PROCNO    1
Date_     20180918
Time      17.51
INSTRUM   spect
PROBHD    5 mm PABBO BB/
PULPROG   zg30
TD         65536
SOLVENT   CDCl3
NS         4
DS         0
SWH        6012.870 Hz
FIDRES     0.122266 Hz
AQ         4.0894966 sec
RG         63.21
DW         62.400 usec
DE         6.50 usec
TE         297.2 K
D1         1.00000000 sec
TD0        1

===== CHANNEL f1 =====
SF01      400.1324710 MHz
NUC1       1H
P1         9.99 usec
SI         65536
SF         400.1300000 MHz
WDW        FM
SSB        0
LB         0.30 Hz
GB         0
PC         1.00
  
```

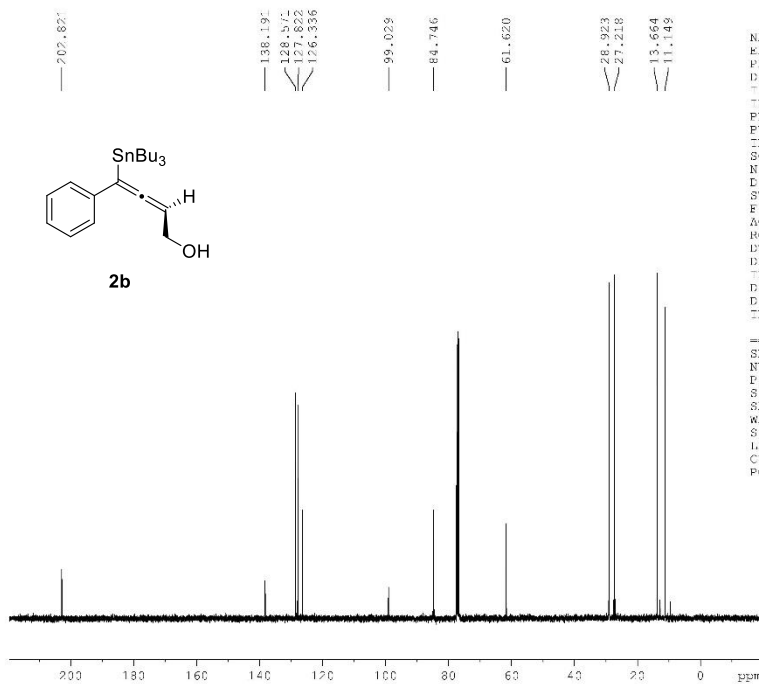

```

NAME      yjl-hk-199-c
EXPNO     21
PROCNO    1
Date_     20180921
Time      18.31
INSTRUM   spect
PROBHD    5 mm PABBO BB/
PULPROG   zgpg30
TD         65536
SOLVENT   CDCl3
NS         256
DS         4
SWH        24038.461 Hz
FIDRES    0.366798 Hz
AQ         1.3631988 sec
RG         197.54
DW         20.800 usec
DE         6.50 usec
TE         298.0 K
D1         2.00000000 sec
D11        0.03000000 sec
TD0        1
  
```

```

===== CHANNEL f1 =====
SFO1      100.6228293 MHz
NUC1      13C
P1         9.31 usec
PT         32768
SF         100.6127685 MHz
WDW        EM
SSB        0
LB         1.00 Hz
GB         0
PC         1.40
  
```

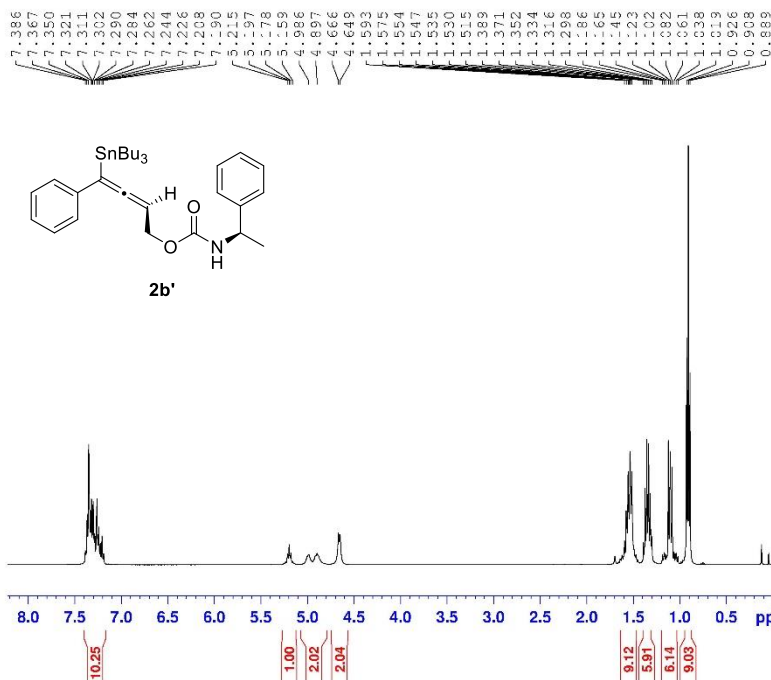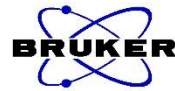

```

NAME      yjl-hk-502-c-1
EXPNO     10
PROCNO    1
Date_     20181119
Time      20.59
INSTRUM   spect
PROBHD    5 mm PABBO BB/
PULPROG   zg30
TD         65536
SOLVENT   CDCl3
NS         4
DS         0
SWH        8012.820 Hz
FIDRES    0.122266 Hz
AQ         4.0894966 sec
RG         19.81
DW         62.400 usec
DE         6.50 usec
TE         295.2 K
D1         1.00000000 sec
TD0        1
  
```

```

===== CHANNEL f1 =====
SFO1      400.1324710 MHz
NUC1      13C
P1         9.33 usec
PT         65536
SF         400.1300000 MHz
WDW        EM
SSB        0
LB         0.30 Hz
GB         0
PC         1.00
  
```

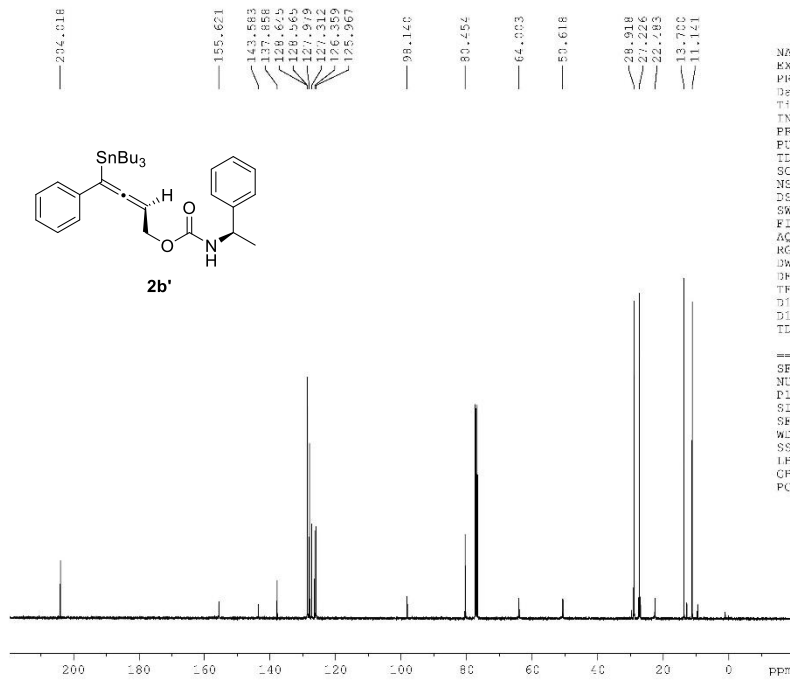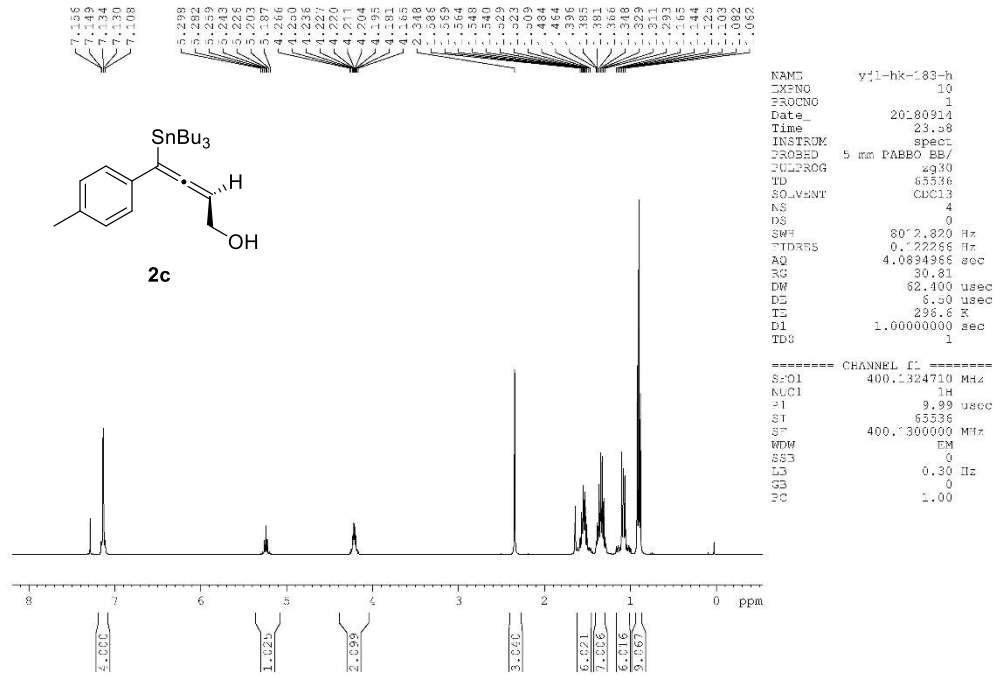

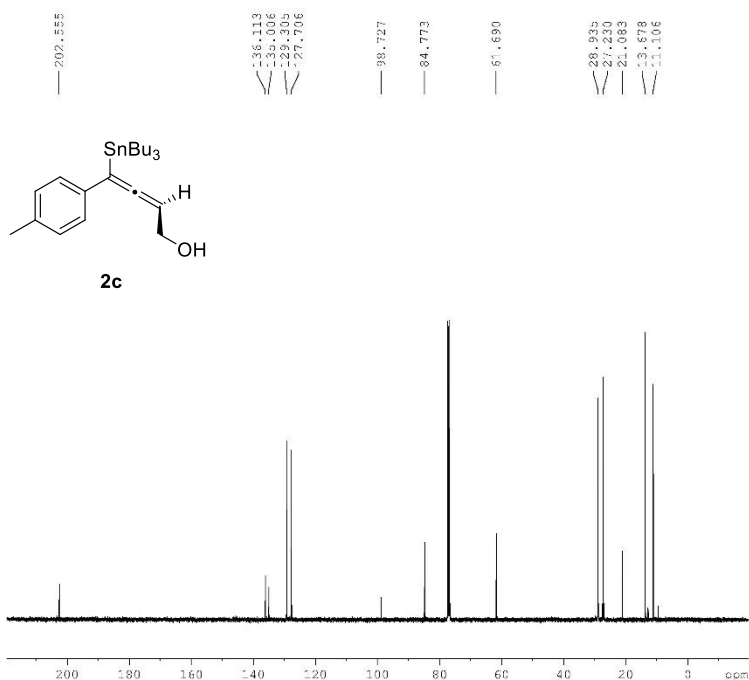

```

NAME      yj1-hk-183-c
EXPNO     11
PROCNO    1
Date_     20180915
Time      0.28
INSTRUM   spect
PROBHD    5 mm PABBO BB/
PULPROG   zgpg30
TD         65536
SOLVENT   CDCl3
NS         312
DS         4
SWH        24039.463 Hz
FIDRES     0.366793 Hz
AQ         1.3631988 sec
RG         197.54
DN         20.800 usec
DE         6.50 usec
TE         297.0 K
D1         2.0000000 sec
D11        0.0300000 sec
TD0        1

===== CHANNEL f1 =====
SF01      100.6228293 MHz
NUC1       13C
P1         9.31 usec
SI         32768
SF         100.6127685 MHz
WDW        EM
SSB        0
LB         1.00 Hz
GB         0
PC         1.40

```

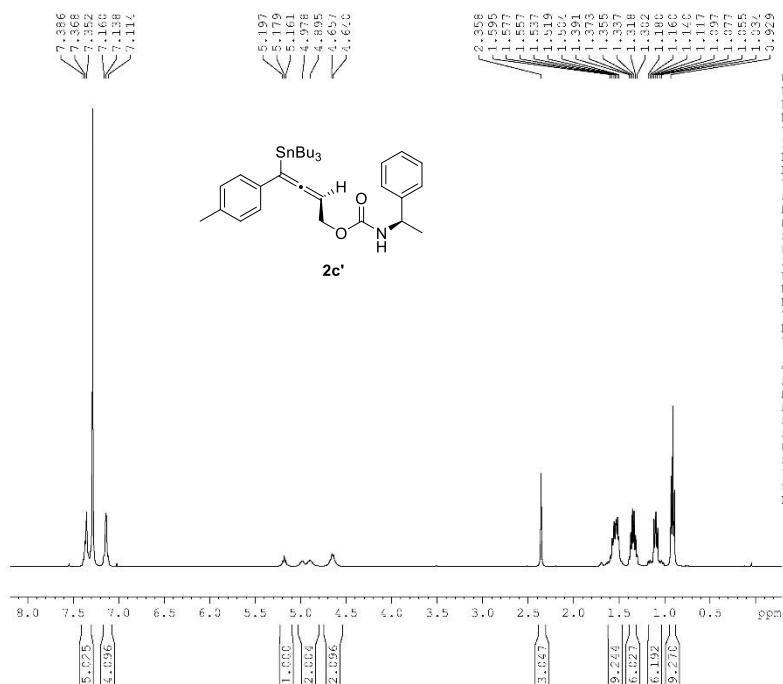

```

NAME      YJ1 HK 495 H
EXPNO     10
PROCNO    1
Date_     20190523
Time      19.32
INSTRUM   spect
PROBHD    5 mm PABBO BB/
PULPROG   zg30
TD         65536
SOLVENT   CDCl3
NS         4
DS         0
SWH        8012.820 Hz
FIDRES     0.122266 Hz
AQ         4.0894965 sec
RG         17.39
DN         62.400 usec
DE         6.50 usec
TE         297.2 K
D1         1.0000000 sec
TD0        1

===== CHANNEL f1 =====
SF01      400.1324710 MHz
NUC1       1H
P1         9.39 usec
SI         65536
SF         400.1300000 MHz
WDW        FM
SSB        0
LB         0.30 Hz
GB         0
PC         1.00

```

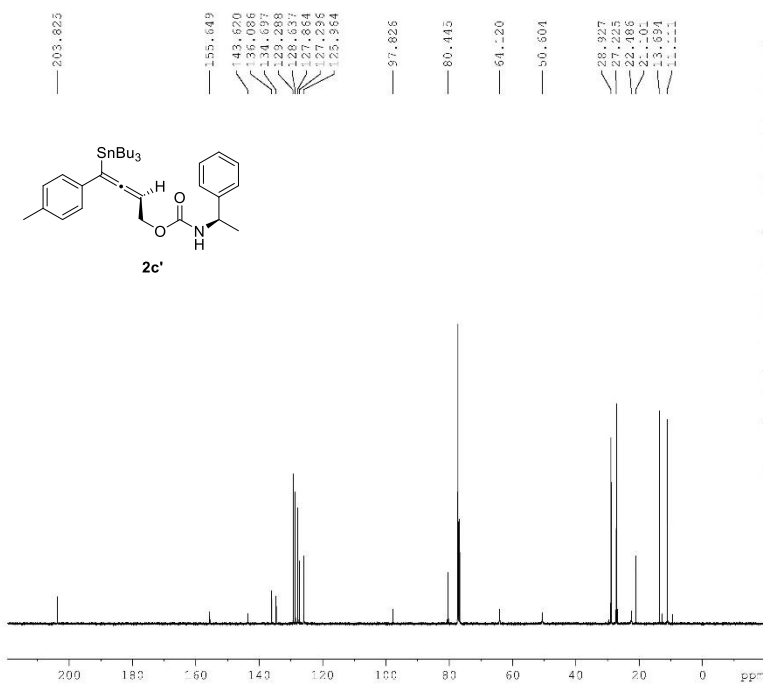

```

NAME      YJL-HK-195-C
EXPNO    11
PROCNO   1
Date_    20190523
Time     20.03
INSTRUM  spect
PROBHD   5 mm PABBO BB/
PULPROG  zgpg30
TD        65536
SOLVENT  CDCl3
NS        4
DS        4
SWH       24038.461 Hz
FIDRES   0.366798 Hz
AQ        1.3631988 sec
RG         197.54
DW         20.800 usec
DE         6.50 usec
TE        297.9 K
D1        2.00000000 sec
D11       0.03000000 sec
TDC       1

===== CHANNEL f1 =====
SFO1     100.6228293 MHz
NUC1     13C
P1        9.31 usec
SI        32768
SF        100.6127685 MHz
WDW       EM
SSB       0
LB        1.00 Hz
GB        0
PC        1.40
  
```

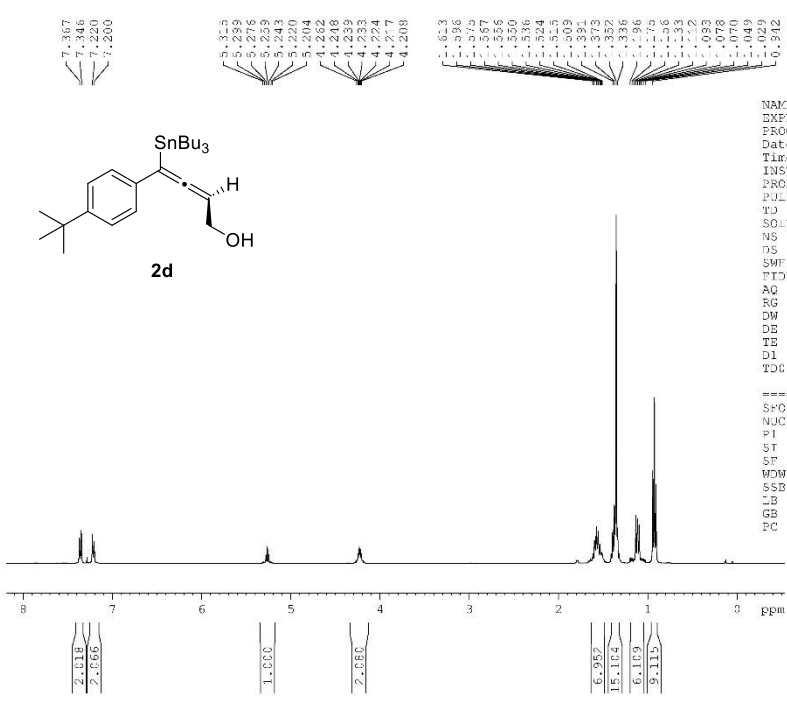

```

NAME      YJL-HK-186-b
EXPNO    10
PROCNO   1
Date_    20180919
Time     21.49
INSTRUM  spect
PROBHD   5 mm PABBO BB/
PULPROG  zg30
TD        65536
SOLVENT  CDCl3
NS        4
DS        0
SWH       8012.820 Hz
FIDRES   0.122266 Hz
AQ        4.0894966 sec
RG         7.74
DW         62.400 usec
DE         6.50 usec
TE        297.4 K
D1        1.00000000 sec
TDC       1

===== CHANNEL f1 =====
SFO1     400.1324710 MHz
NUC1     1H
P1        9.99 usec
SI        65536
SF        400.1300000 MHz
WDW       EM
SSB       0
LB        0.30 Hz
GB        0
PC        1.00
  
```



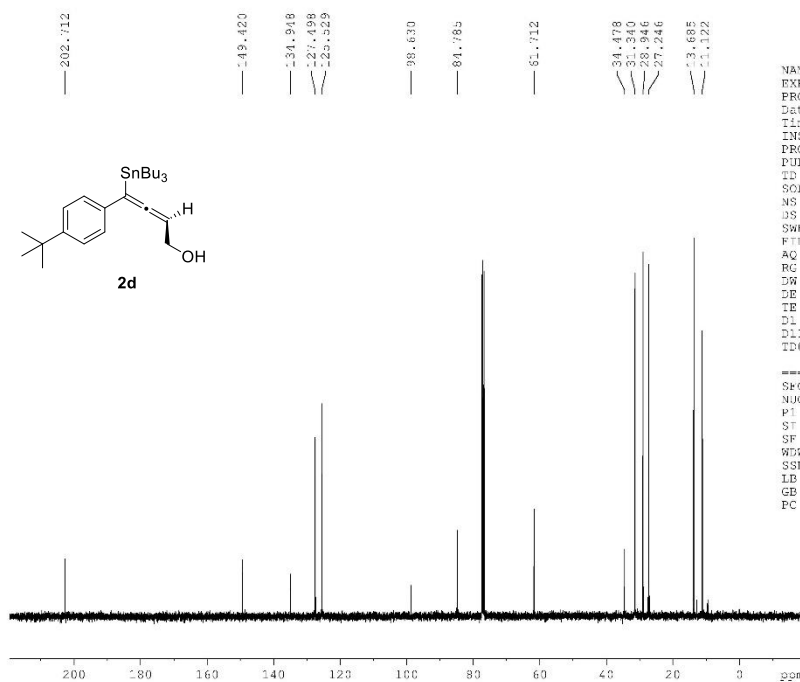

```

NAME      yj1-hk-186-c
EXPNO     10
PROCNO    1
Date_     20180327
Time      20.41
INSTRUM   spect
PROBHD    5 mm PABBO BB/
PULPROG   zgpg30
TD         65536
SOLVENT   CDCl3
NS         200
DS         4
SWH        24338.461 Hz
FIDRES     0.366798 Hz
AQ         1.3631988 sec
RG         197.54
DW         20.600 usec
DE         6.50 usec
TE         296.2 K
D1         2.0000000 sec
D11        0.0300000 sec
TDO        1

===== CHANNEL f1 =====
SFO1      100.6228293 MHz
NUC1       13C
PI         9.31 usec
PT         32768
SF         100.6127685 MHz
WDW        EM
SSB        0
LB         1.00 Hz
GB         0
PC         1.00
  
```

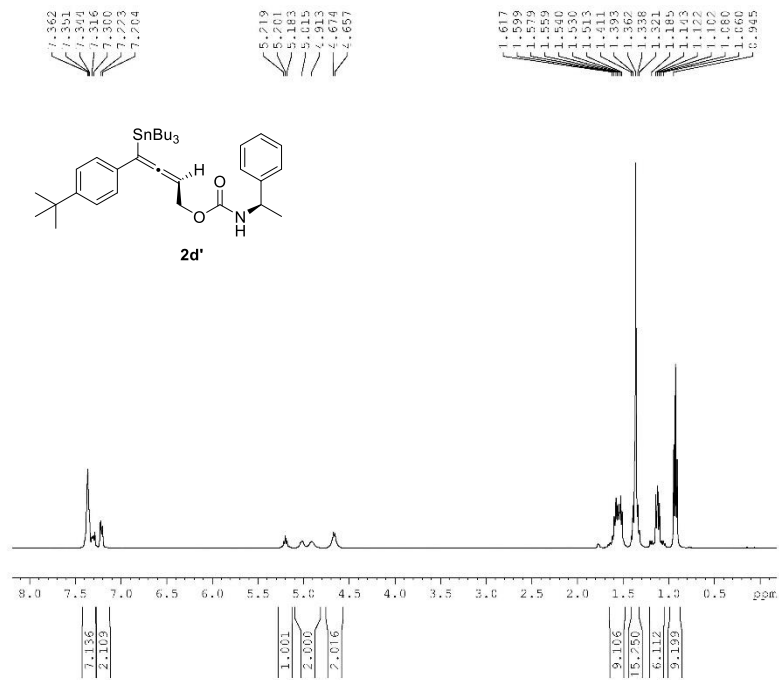

```

NAME      YJ1-HK-499-T
EXPNO     20
PROCNO    1
Date_     20190612
Time      16.56
INSTRUM   spect
PROBHD    5 mm PABBO BB/
PULPROG   zgpg30
TD         65536
SOLVENT   CDCl3
NS         4
DS         3
SWH        8012.823 Hz
FIDRES     0.122266 Hz
AQ         4.0894966 sec
RG         8.85
DW         62.433 usec
DE         6.50 usec
TE         297.9 K
D1         1.0000000 sec
TDC        1

===== CHANNEL f1 =====
SFO1      400.1324710 MHz
NUC1       1H
PI         9.99 usec
PT         65536
SF         400.1300000 MHz
WDW        EM
SSB        0
LB         0.30 Hz
GB         0
PC         1.00
  
```

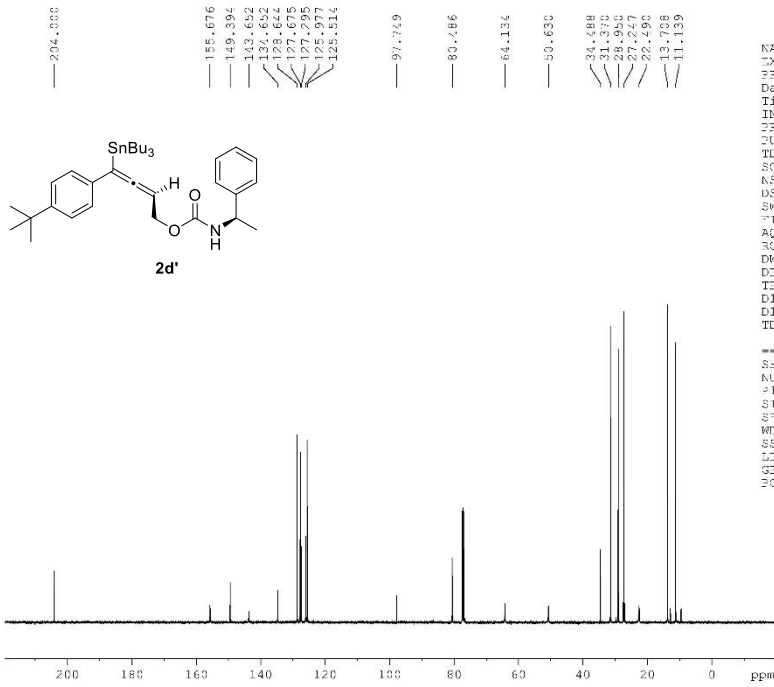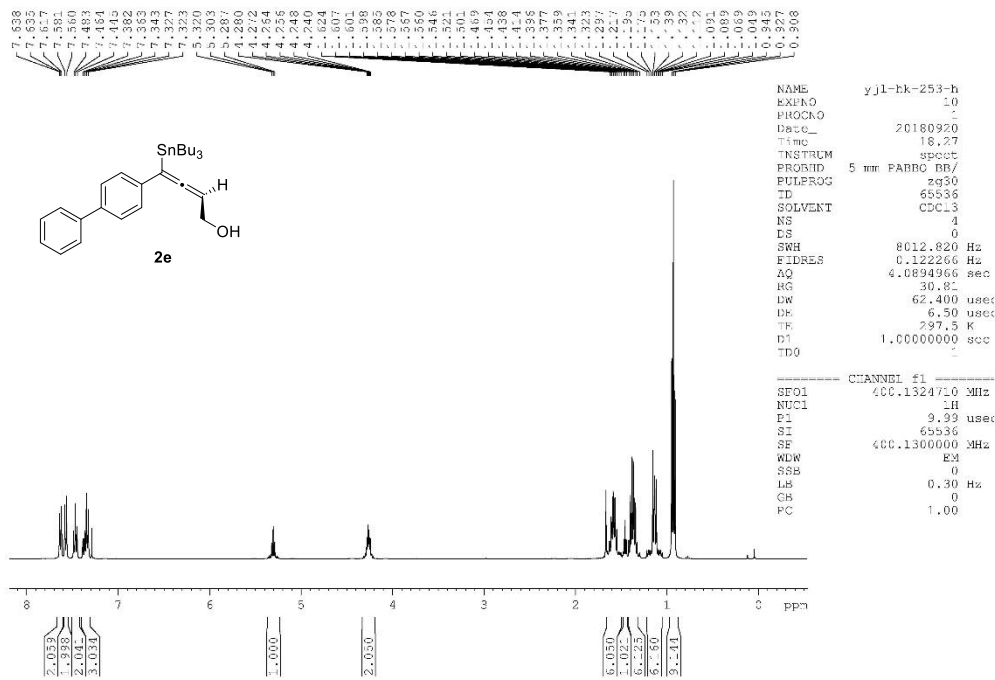

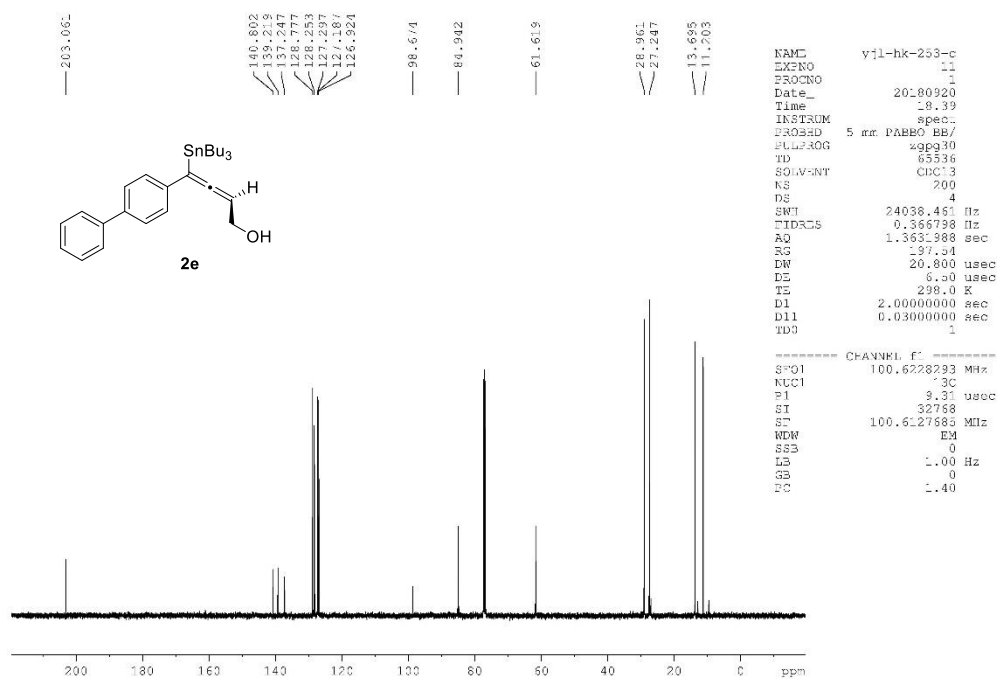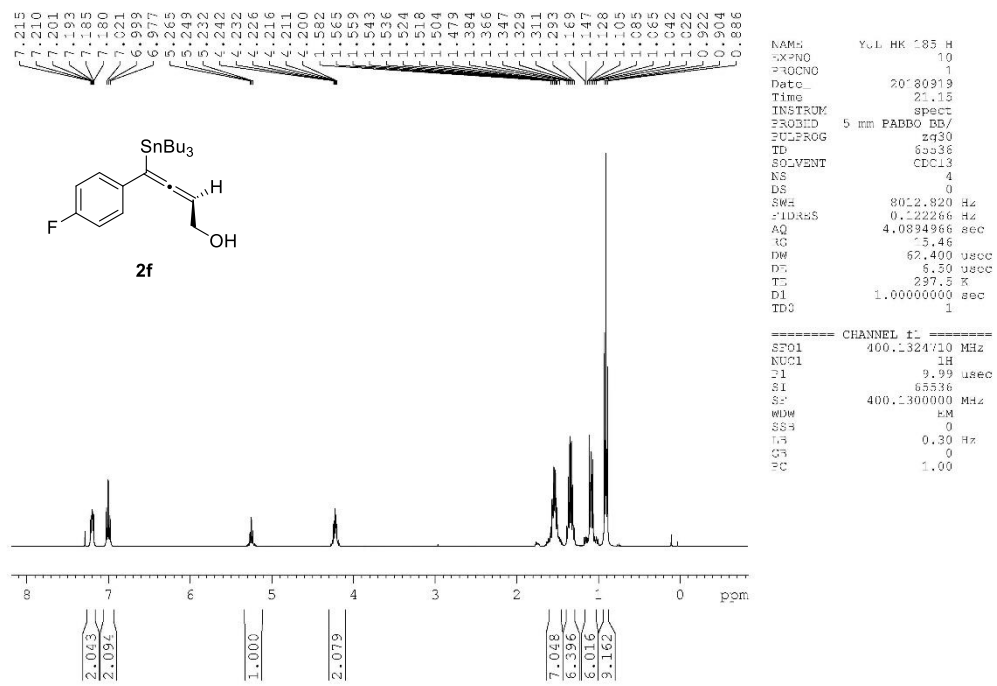

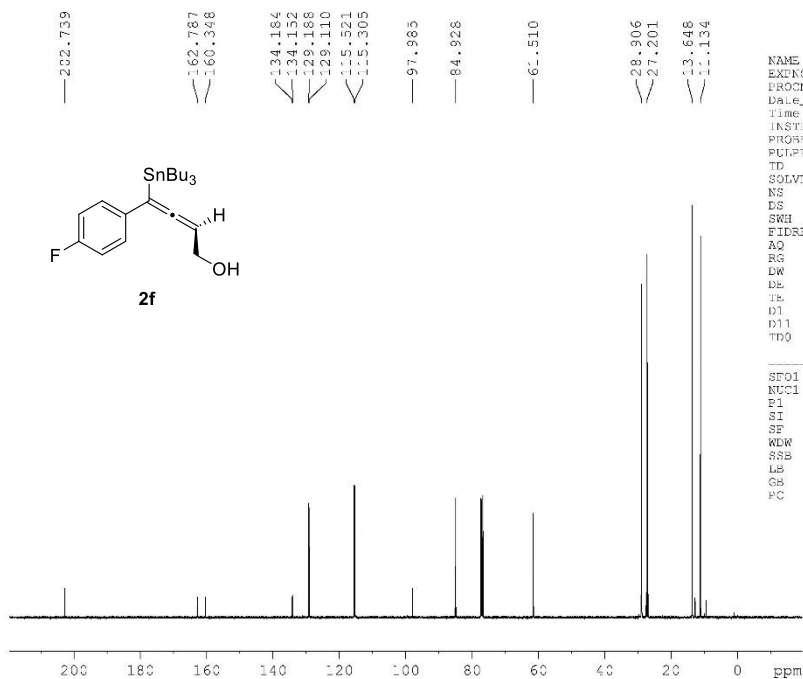

```

NAME      yjl-hk-185-c
EXPNO    11
PROCNO   1
Date_    20180929
Time     21.45
INSTRUM  spect
PROBHD   5 mm PABBO BB/
PULPROG  zgpg30
TD       65536
SOLVENT  CDCl3
NS       512
DS       4
SWH      24038.461 Hz
FIDRES   0.366798 Hz
AQ       1.3631988 sec
RG       197.54
DW       20.880 usec
DE       6.50 usec
TE       297.9 K
D1       2.0000000 sec
D11      0.0300000 sec
TD0      1
  
```

```

===== CHANNEL f1 =====
SFO1    100.6228233 MHz
NUC1    13C
P1      9.31 usec
SI      32768
SF      100.6127685 MHz
WDW     EM
SSB     0
LB      1.00 Hz
GB      0
PC      1.40
  
```

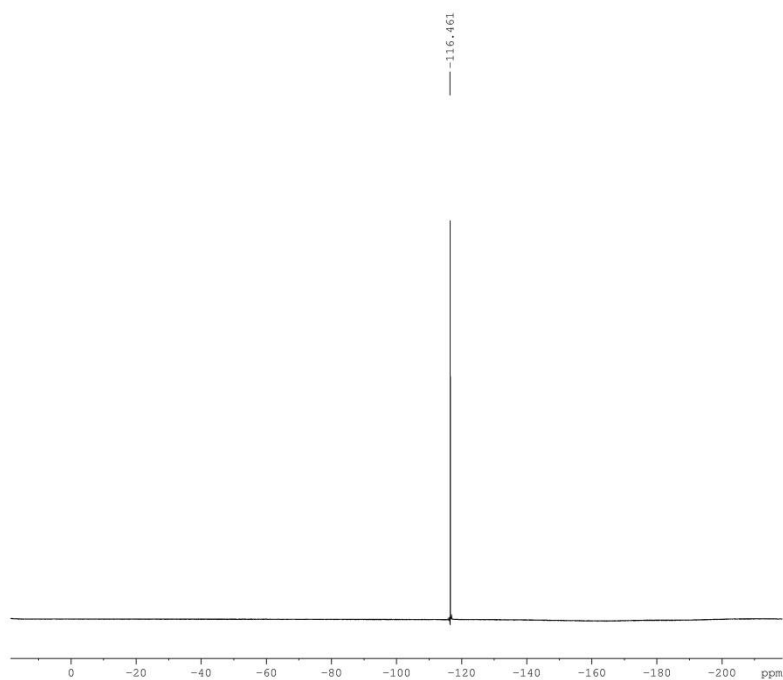

```

NAME      yjl-hk-185-f
EXPNO    10
PROCNO   1
Date_    20200916
Time     18.55
INSTRUM  spect
PROBHD   5 mm PABBO BB/
PULPROG  zgpg30
TD       131072
SOLVENT  CDCl3
NS       16
DS       4
SWH      89285.711 Hz
FIDRES   0.681196 Hz
AQ       0.7340532 sec
RG       197.54
DW       5.600 usec
DE       6.50 usec
TE       297.5 K
D1       1.0000000 sec
D11      0.0300000 sec
D12      0.0000200 sec
TD0      1
  
```

```

===== CHANNEL f1 =====
SFO1    376.4607164 MHz
NUC1    19F
P1      14.00 usec
SI      65536
SF      376.4983662 MHz
WDW     EM
SSB     0
LB      0.30 Hz
GB      0
PC      1.00
  
```

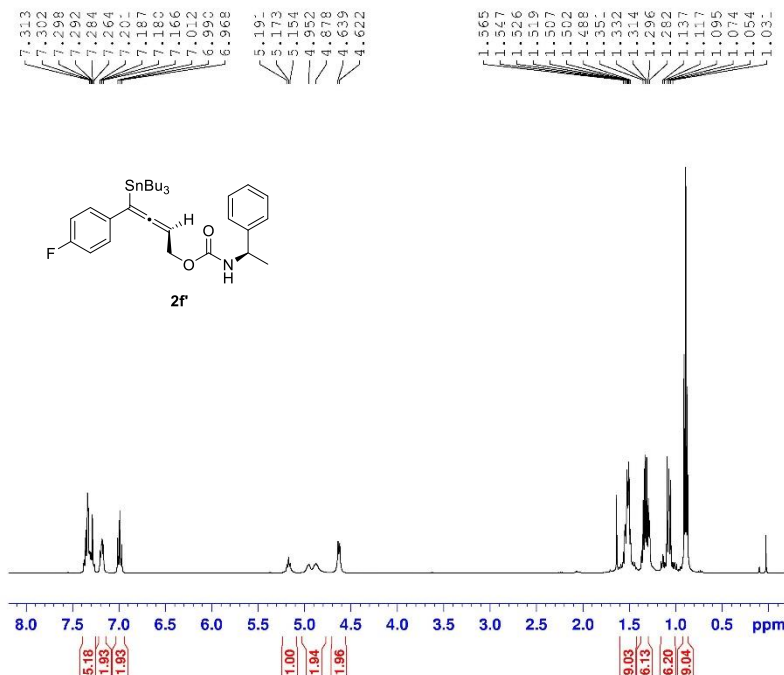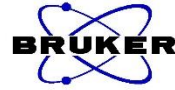

```

NAME      yj1-hk-498-b
EXPNO     0
PROCNO    1
Date_     20181115
Time      15.42
INSTRUM   spect
PROBHD    5 mm PABBO BB/
PULPROG   zgpg30
TD         65536
SOLVENT   CDCl3
NS         4
DS         0
SWH        8012.820 Hz
FIDRES     0.122266 Hz
AQ         4.0894966 sec
RG         30.8
DW         62.400 usec
DE         6.50 usec
TE         295.4 K
D1         1.0000000 sec
D10        1
  
```

```

===== CHANNEL f1 =====
SFO1      400.132470 MHz
NUC1      13C
PI        9.99 usec
SI        65536
SF        400.1300000 MHz
WDW       EM
SSB       0
LB        0.30 Hz
GB        0
PC        1.00
  
```

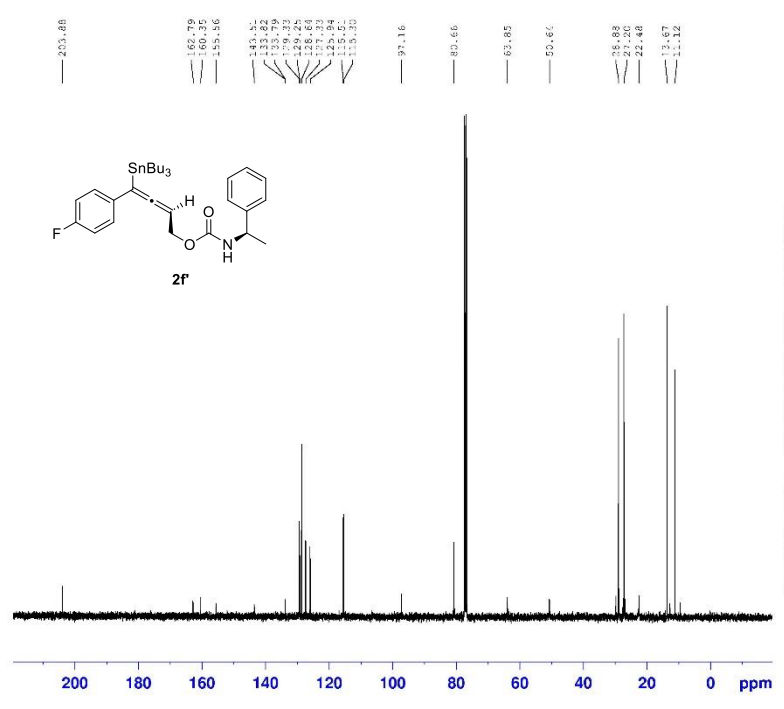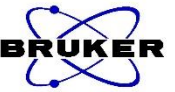

```

NAME      yj1-hk-498-b
EXPNO     12
PROCNO    1
Date_     20181115
Time      20.08
INSTRUM   spect
PROBHD    5 mm PABBO BB/
PULPROG   zgpg30
TD         65536
SOLVENT   CDCl3
NS         4
DS         0
SWH        24038.461 Hz
FIDRES     0.336098 Hz
AQ         1.3631988 sec
RG         197.54
DW         20.800 usec
DE         6.50 usec
TE         296.3 K
D1         2.0000000 sec
D10        0.0300000 sec
D100       1
  
```

```

===== CHANNEL f1 =====
SFO1      100.6228293 MHz
NUC1      13C
PI        9.31 usec
SI        32768
SF        100.6127685 MHz
WDW       EM
SSB       0
LB        1.00 Hz
GB        0
PC        1.40
  
```

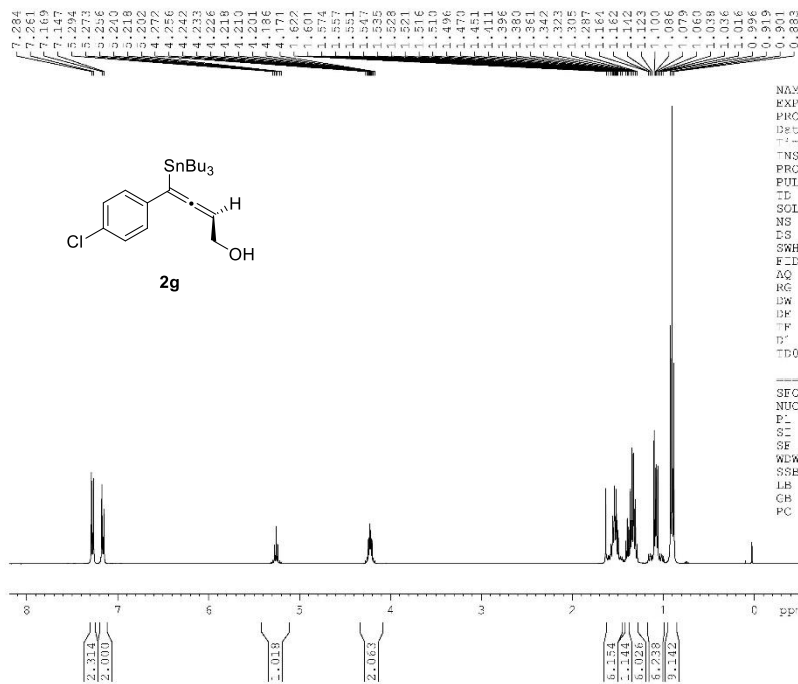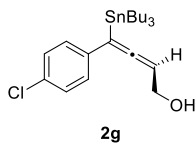

NAME yj1-hk-206-h  
EXPNO 10  
PROCNO 1  
Date\_ 20180918  
Time 16.11  
INSTRUM spect  
PROBHD 5 mm PABBO BB/  
PULPROG zg30  
TD 65536  
SOLVENT CDCl3  
NS 4  
DS 0  
SWH 8912.820 Hz  
FIDRES 0.122266 Hz  
AQ 4.0894966 sec  
RG 30.81  
DW 62.400 usec  
DE 6.50 usec  
TE 297.3 K  
D1 1.00000000 sec  
TDC 1

===== CHANNEL f1 =====  
SFO1 400.1324710 MHz  
NUC1 1H  
PL 9.99 usec  
SI 65536  
SF 400.1300000 MHz  
WDW BK  
SSB 0  
LB 0.30 Hz  
GB 0  
PC 1.00

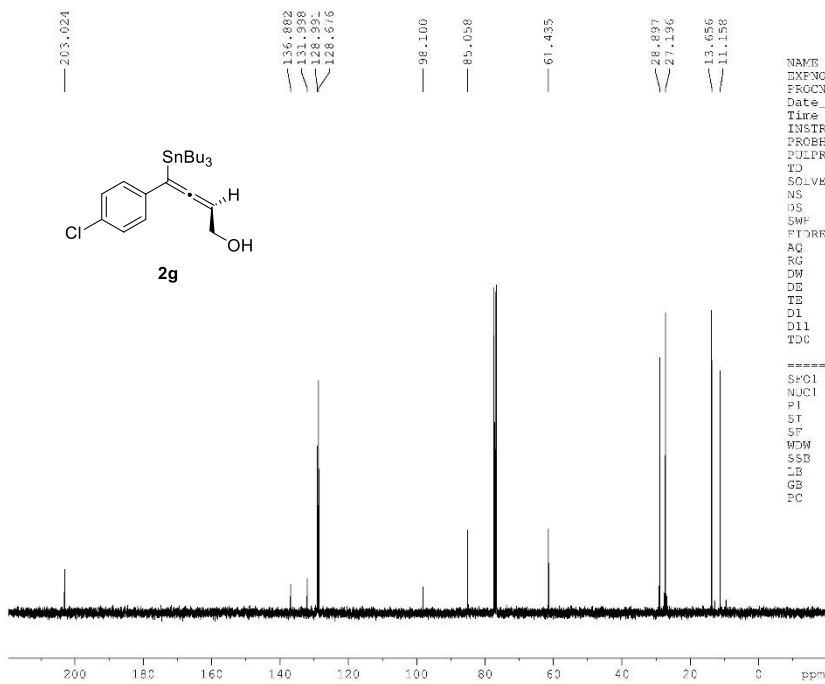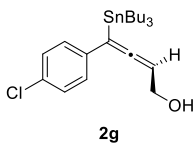

NAME yj1-hk-206-c  
EXPNO 11  
PROCNO 1  
Date\_ 20180918  
Time 16.18  
INSTRUM spect  
PROBHD 5 mm PABBO BB/  
PULPROG zgpg30  
TD 65536  
SOLVENT CDCl3  
NS 100  
DS 4  
SWH 24038.461 Hz  
FIDRES 0.366798 Hz  
AQ 1.3631988 sec  
RG 197.54  
DW 20.800 usec  
DE 6.50 usec  
TE 297.9 K  
D1 2.00000000 sec  
D11 0.03000000 sec  
TDC 1

===== CHANNEL f1 =====  
SFO1 100.6228293 MHz  
NUC1 13C  
PL 9.31 usec  
SI 32768  
SF 100.6127685 MHz  
WDW EM  
SSB 0  
LB 1.00 Hz  
GB 0  
PC 1.40

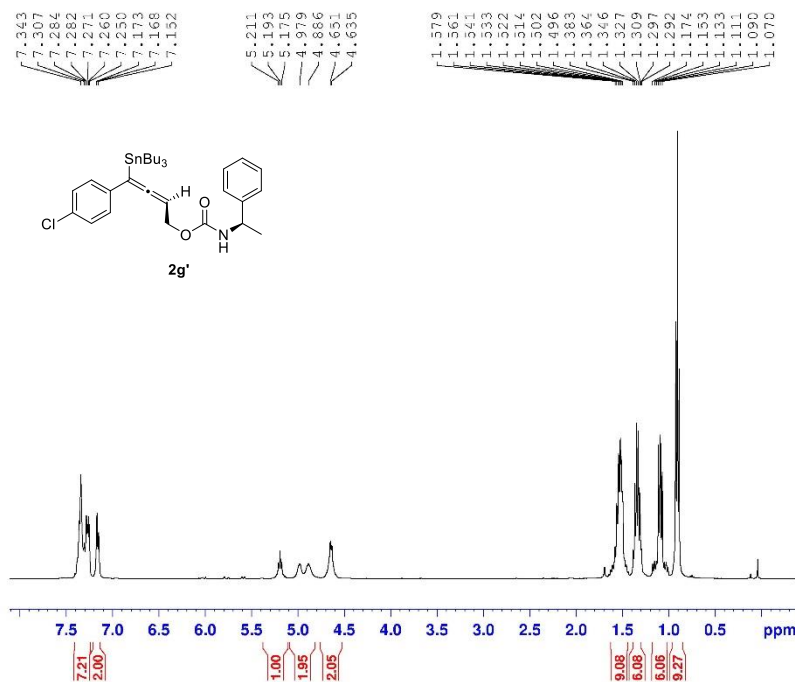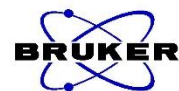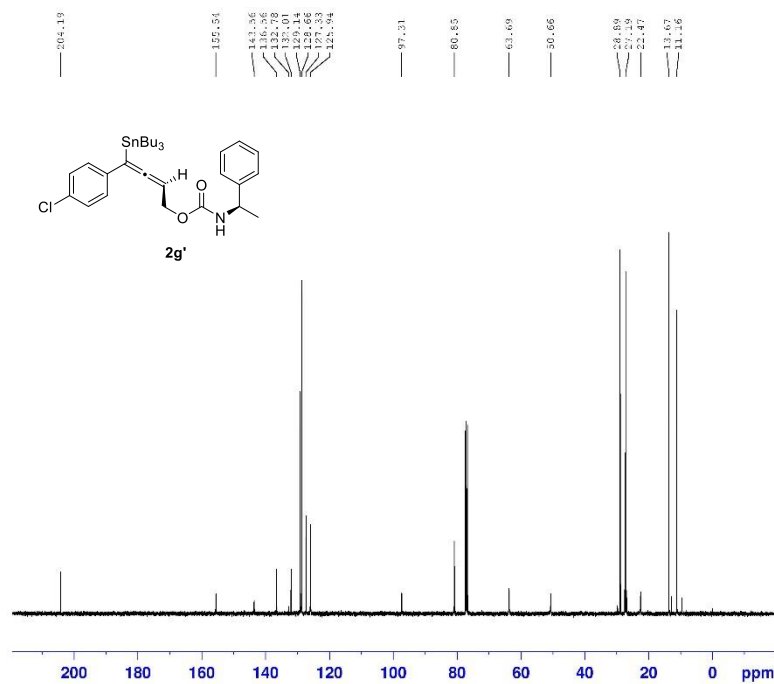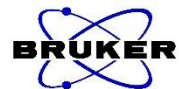

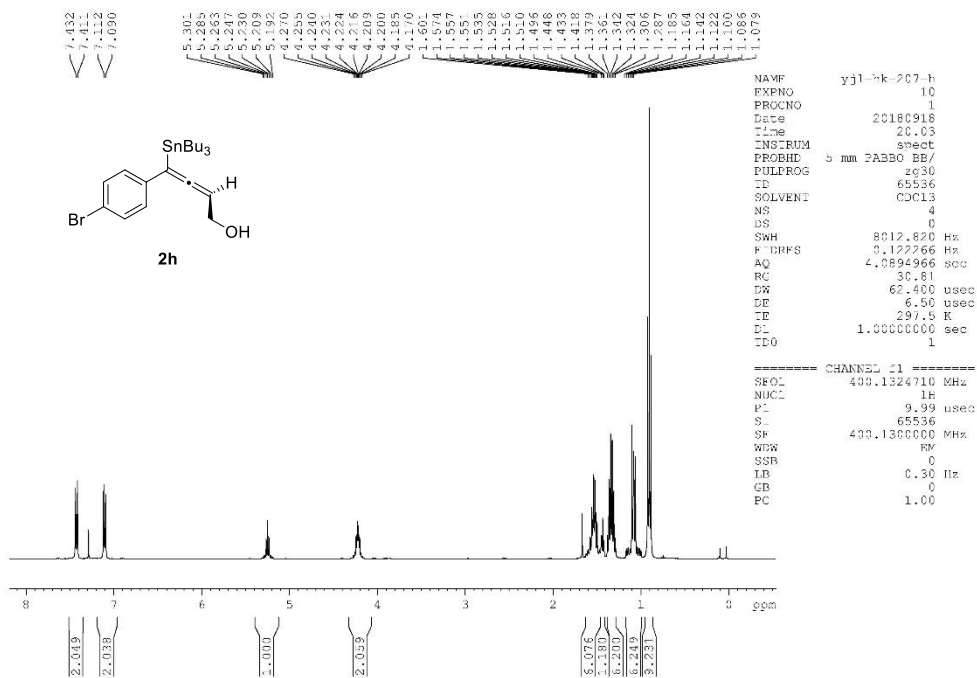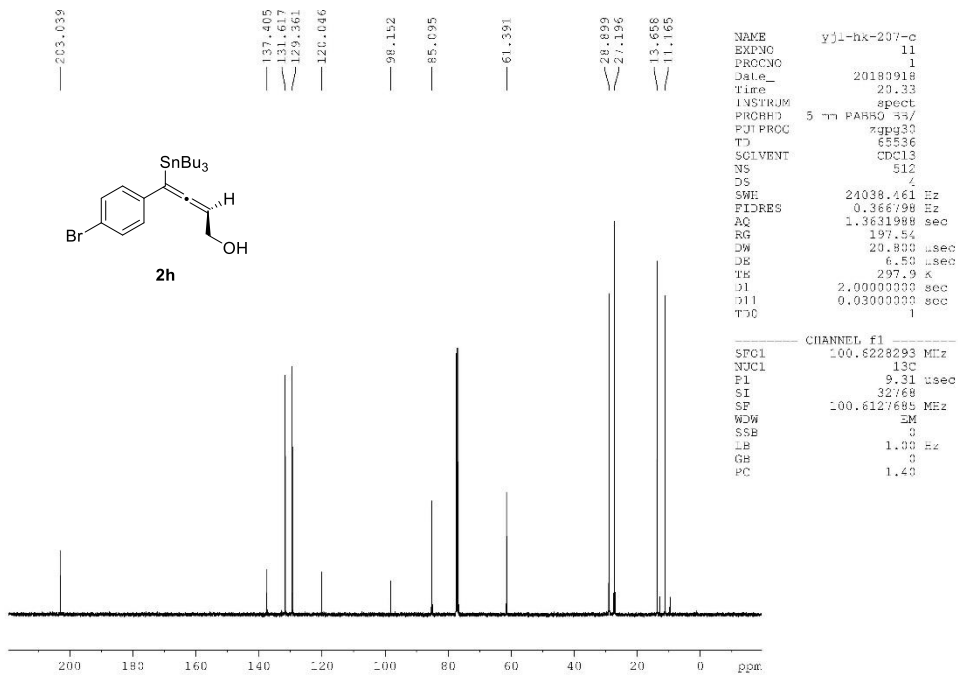



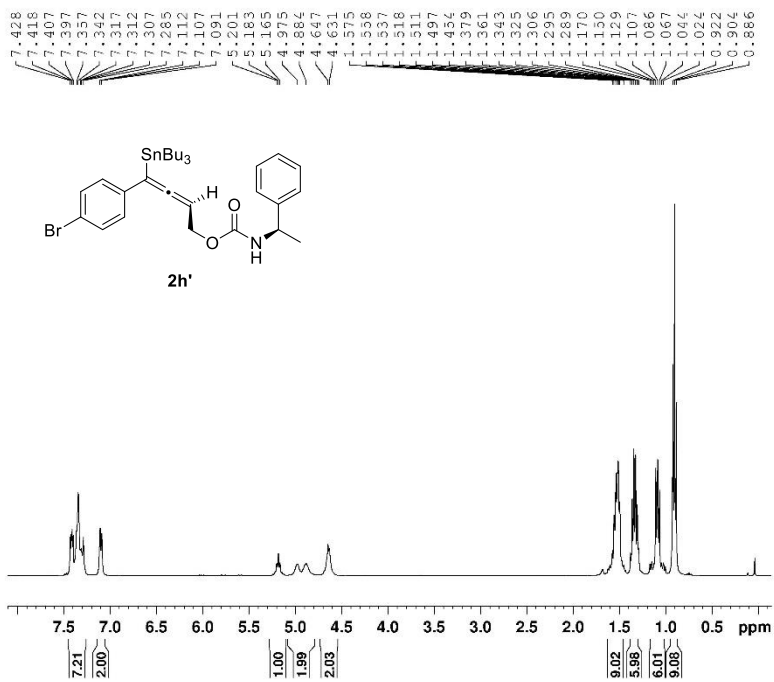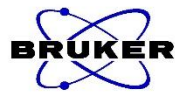

```

NAME      yj1-hk-503-h
EXPNO     10
PROCNO    1
Date_     20190603
Time      19.48
INSTRUM   spect
PROBHD    5 mm PABBO 4H/
PULPROG   zgpg30
TD         65536
SOLVENT   CDCl3
NS         4
DS         0
SWH        8012.820 Hz
FIDRES     0.122286 Hz
AQ         4.5894966 sec
RG         9.81
DH         62.400 usec
DE         6.30 usec
TE         293.7 K
D1         1.00000000 sec
D11        1
===== CHANNEL f1 =====
SFO1      400.1324710 MHz
NUC1      1H
P1         9.59 usec
SI         65536
SF         400.1300000 MHz
WDW        EM
SSB        0
GB         0
PC         1.60
  
```

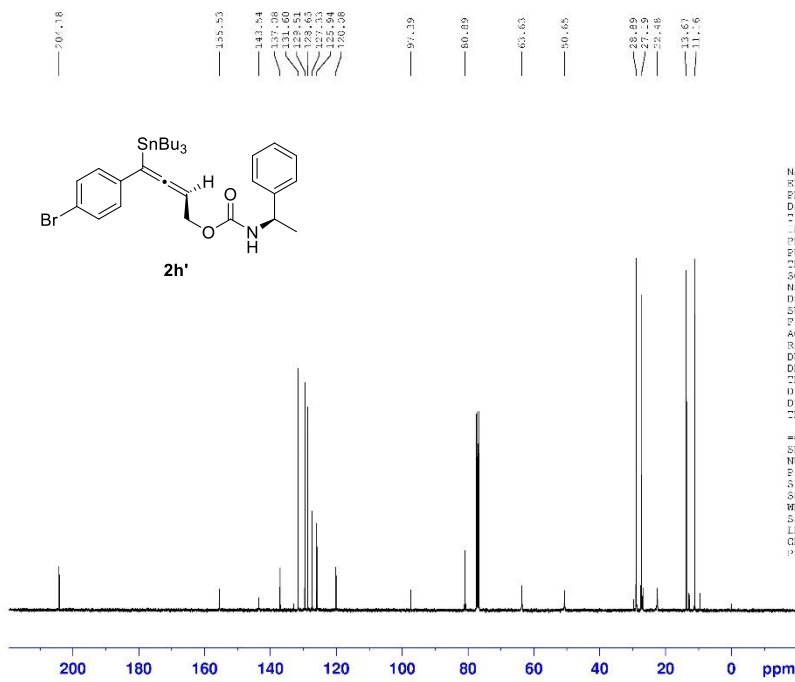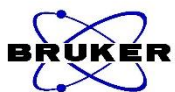

```

NAME      yj1-hk-503-c
EXPNO     11
PROCNO    1
Date_     20190603
Time      20.34
INSTRUM   spect
PROBHD    5 mm PABBO 4H/
PULPROG   zgpg30
TD         65536
SOLVENT   CDCl3
NS         4
DS         0
SWH        24038.461 Hz
FIDRES     0.266798 Hz
AQ         1.3511988 sec
RG         197.54
DH         20.800 usec
DE         6.30 usec
TE         298.3 K
D1         2.00000000 sec
D11        1
===== CHANNEL f1 =====
SFO1      100.6220293 MHz
NUC1      13C
P1         9.31 usec
SI         32768
SF         100.6172685 MHz
WDW        EM
SSB        0
GB         0
PC         1.40
  
```

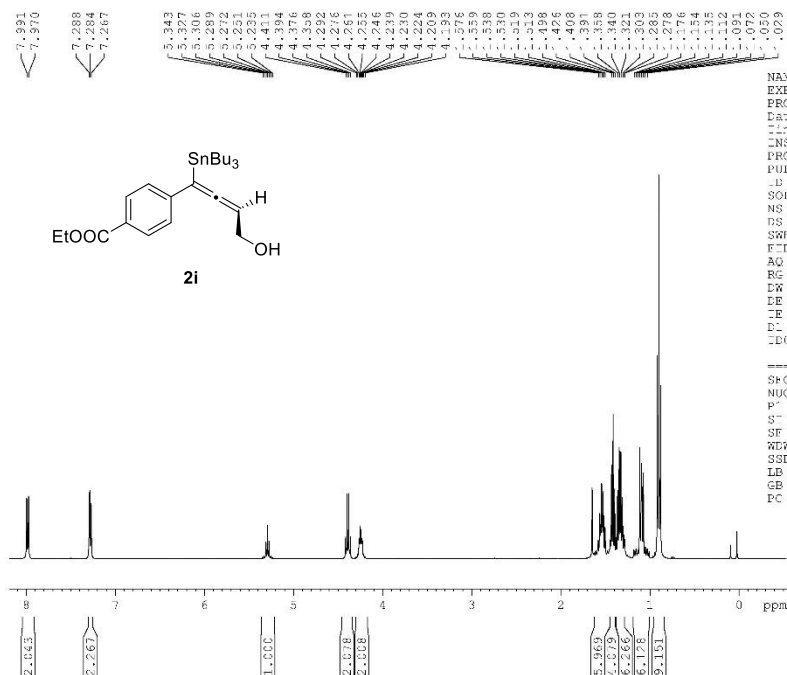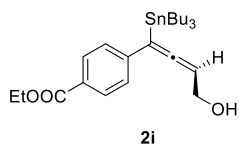

```

NAME yjl-hk-208-h-1
EXPNO 10
PROCNO 1
Date_ 20181102
Time 17.40
INSTRUM spect
PROBHD 5 mm PABBO BB/
PULPROG zgpg30
ID 65536
SOLVENT CDCl3
NS 4
DS 0
SWH 8012.820 Hz
FIDRES 0.122266 Hz
AQ 4.0894966 sec
RG 78.33
DX 62.400 usec
DE 6.50 usec
TE 298.7 K
DE 1.00000000 sec
DO 1

===== CHANNEL f1 =====
SFO1 400.1324710 MHz
NUC1 1H
P1 9.99 usec
SFO 65536
SF 400.1300000 MHz
WDW EM
SSB 0
GB 0.30 Hz
PC 1.00

```

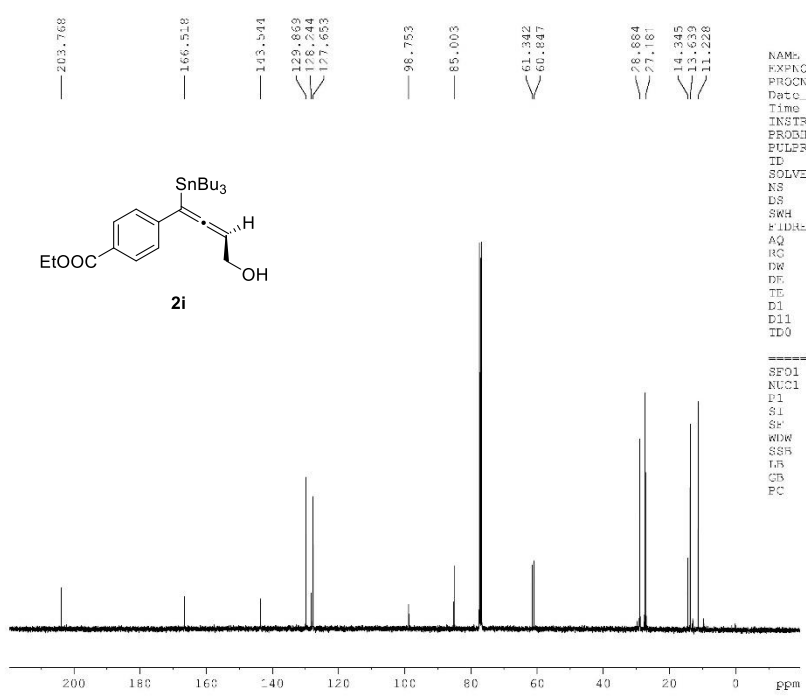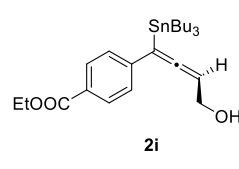

```

NAME yjl-hk-208-c-1
EXPNO 10
PROCNO 1
Date_ 20181102
Time 18.70
INSTRUM spect
PROBHD 5 mm PABBO BB/
PULPROG zgpg30
ID 65536
SOLVENT CDCl3
NS 4
DS 0
SWH 24038.461 Hz
FIDRES 0.366798 Hz
AQ 1.3631988 sec
RG 197.54
DX 20.800 usec
DE 6.50 usec
TE 299.4 K
D1 2.00000000 sec
D11 0.03000000 sec
DO 1

===== CHANNEL f1 =====
SFO1 100.6228293 MHz
NUC1 13C
P1 9.99 usec
SFO 100.6127685 MHz
WDW FM
SSB 0
GB 1.00 Hz
PC 1.40

```

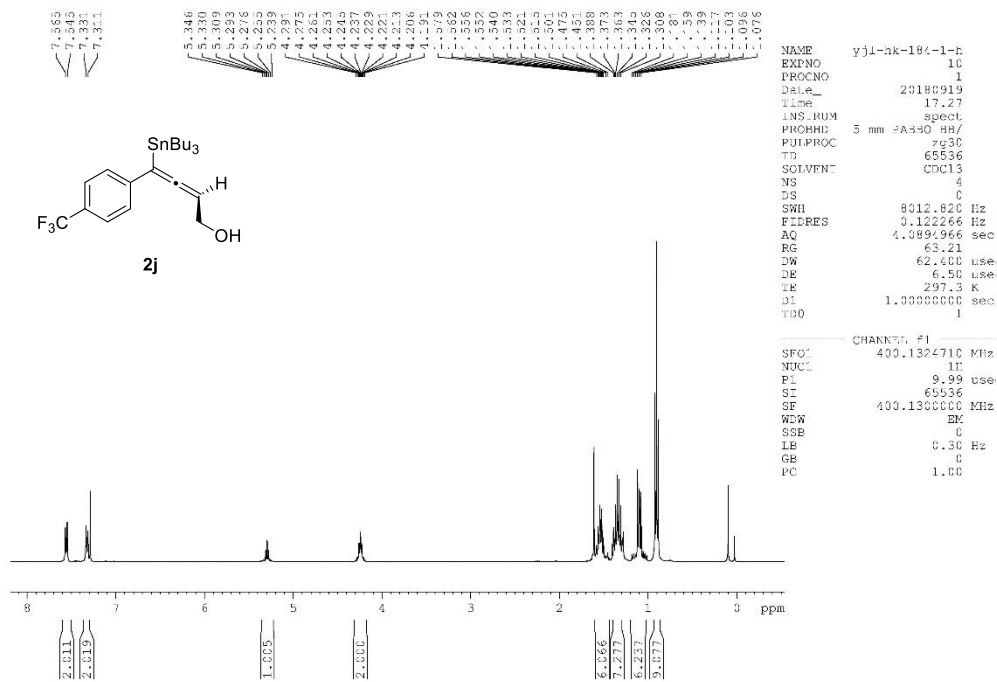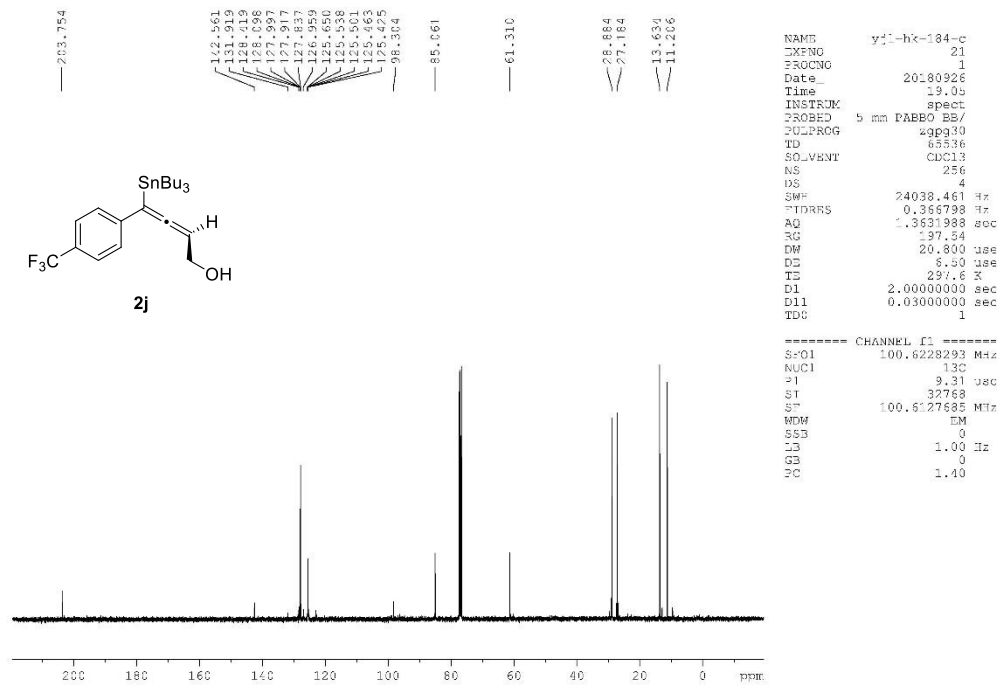

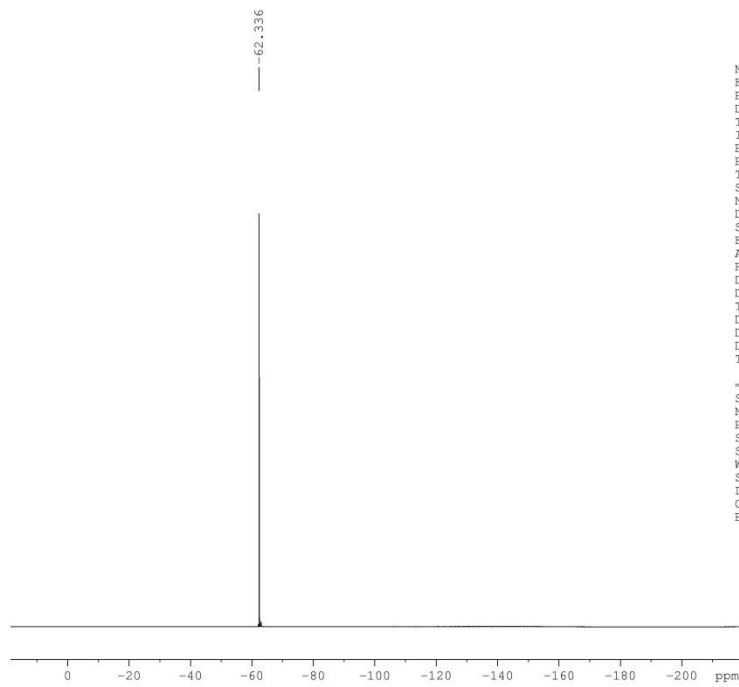

```

NAME      yj1-hk-184-f
EXPNO     32
PROCNO    1
Date_     20180928
Time      16.48
INSTRUM   spect
PROBHD    5 mm PABBO BB/
PULPROG   zgfhigqn.2
TD         131072
SOLVENT   CDCl3
NS         16
DS         4
SWH        89285.711 Hz
FIDRES     0.681196 Hz
AQ         0.7340532 s
RG         197.54
DW         5.600 us
DE         6.50 us
TE         297.0 K
D1         1.0000000 s
D11        0.0300000 s
D12        0.0000200 s
TD0        1
  
```

```

===== CHANNEL f1 =====
SFO1      376.4607164 MHz
NUC1      13C
P1        14.00 us
SI        65536
SF        376.4983662 MHz
WDW       EM
SSB       0
LB        0.30 Hz
GB        0
PC        1.00
  
```

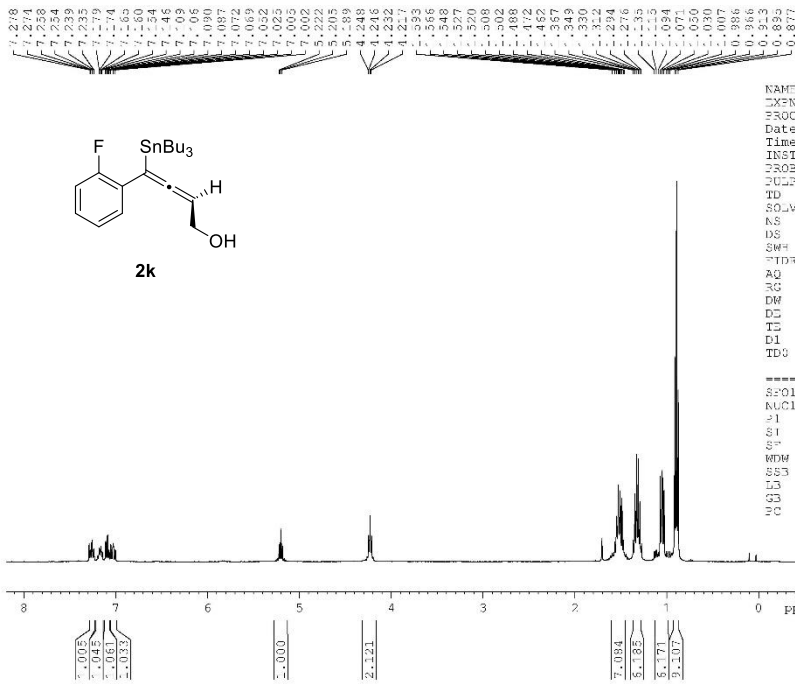

```

NAME      yj1-hk-212-h
EXPNO     10
PROCNO    1
Date_     20180320
Time      14.40
INSTRUM   spect
PROBHD    5 mm PABBO BB/
PULPROG   zg30
TD         65536
SOLVENT   CDCl3
NS         4
DS         0
SWH        8072.820 Hz
FIDRES     0.22286 Hz
AQ         4.0834366 sec
RG         30.81
DW         82.400 usec
DE         8.50 usec
TE         291.8 K
D1         1.0000000 sec
TD0        1
  
```

```

===== CHANNEL f1 =====
SFO1      400.1324710 MHz
NUC1      1H
P1        9.99 usec
SI        65536
SF        400.1300000 MHz
WDW       EM
SSB       0
LB        0.30 Hz
GB        0
PC        1.00
  
```

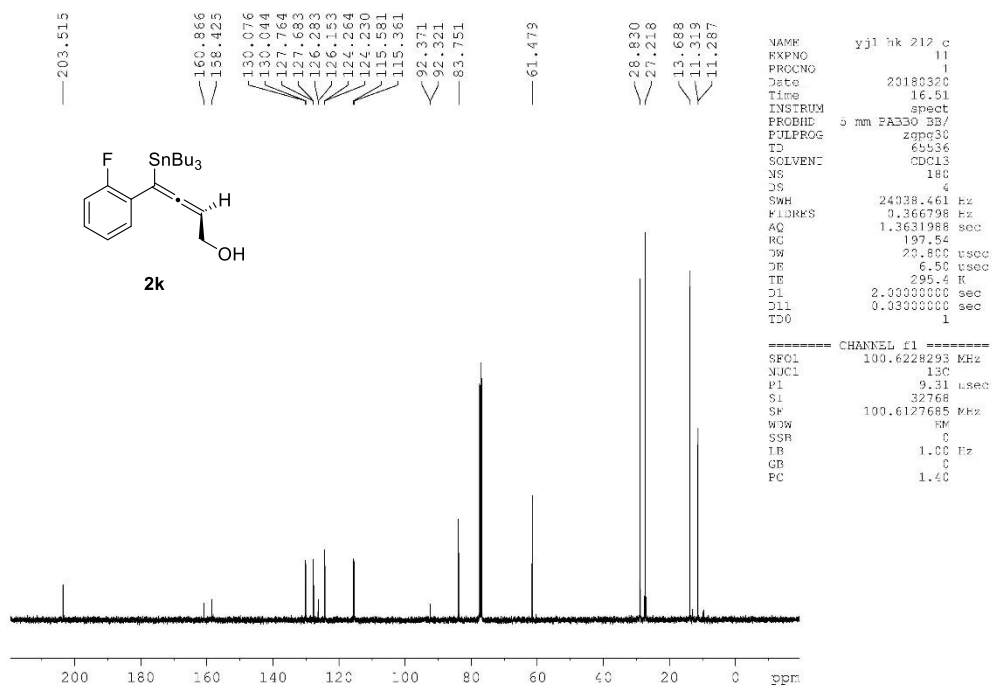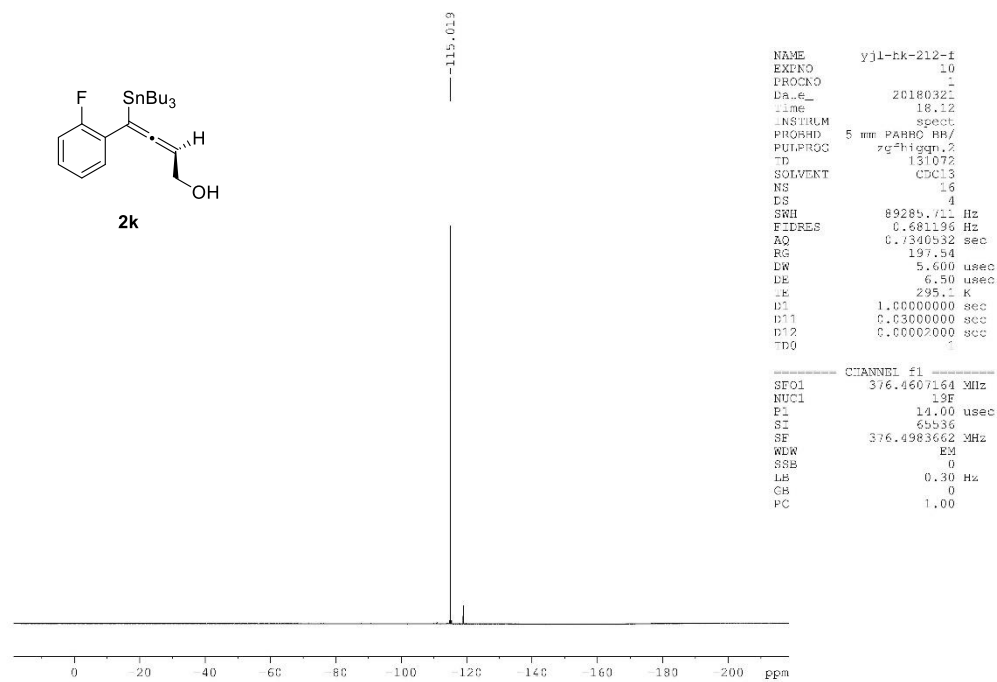

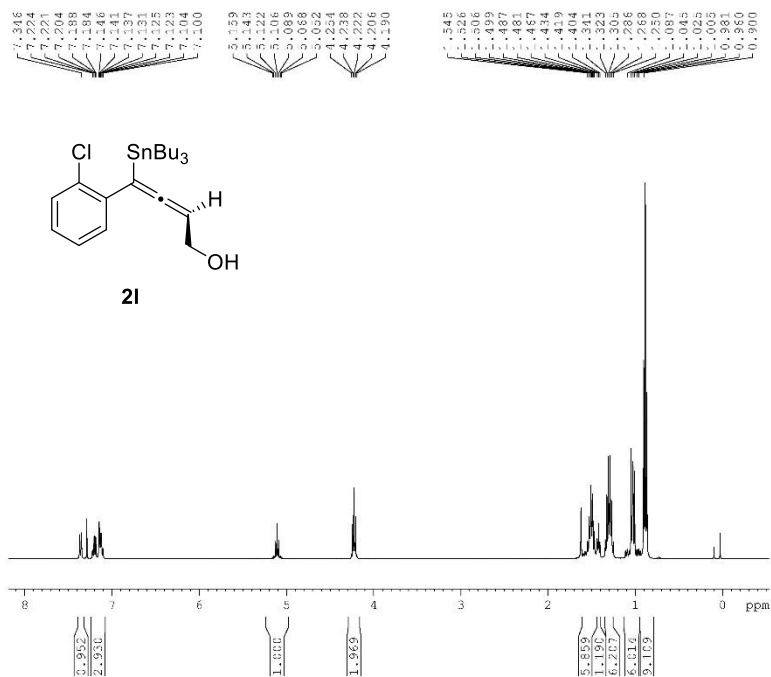

```

NAME      vijl-hk-241-h
EXPNO    1
PROCNO   1
Date_    20180926
Time     17.40
INSTRUM  spect
PROBHD   5 mm PABBO BB/
PULPROG  zgpg30
TD       65536
SOLVENT  CDCl3
NS       4
DS       0
SWH      8012.820 Hz
FIDRES   0.122266 Hz
AQ       4.0894966 sec
RG       53.87
DW       62.400 usec
DE       6.50 usec
TE       297.0 K
D1       1.0000000 sec
TD0      1

===== CHANNEL f1 =====
SFO1     400.1324710 MHz
NUC1     1H
PI       9.99 usec
SI       65536
SF       400.1300000 MHz
WDW      EM
SSB      0
LB       0.30 Hz
GB       0
PC       1.00
  
```

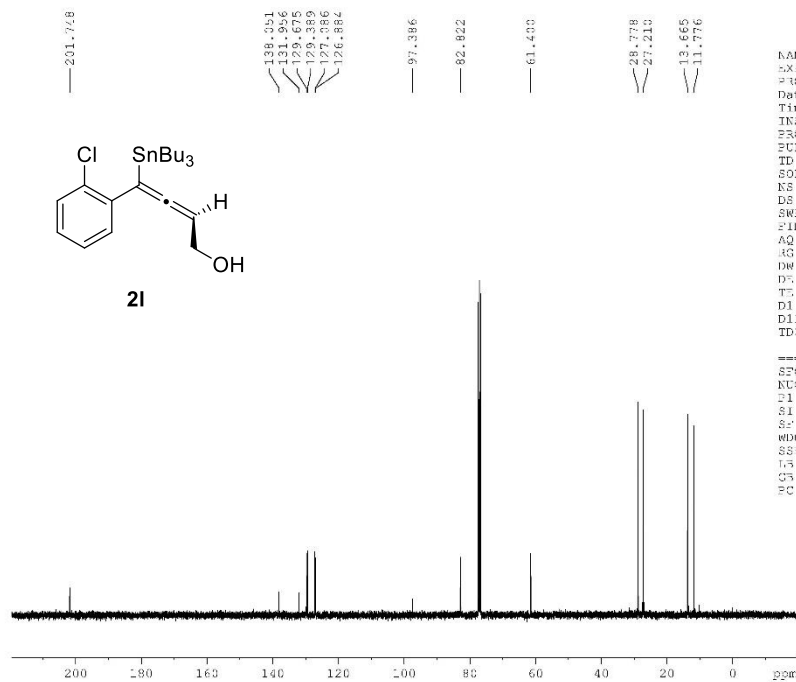

```

NAME      vijl-hk-241-c
EXPNO    11
PROCNO   1
Date_    20180926
Time     17.32
INSTRUM  spect
PROBHD   5 mm PABBO BB/
PULPROG  zgpg30
TD       65536
SOLVENT  CDCl3
NS       4
DS       0
SWH      24038.461 Hz
FIDRES   0.366798 Hz
AQ       1.3631988 sec
RG       197.54
DW       20.800 usec
DE       5.50 usec
TE       297.0 K
D1       2.0000000 sec
D11      0.0300000 sec
TD0      1

===== CHANNEL f1 =====
SFO1     100.6228293 MHz
NUC1     13C
PI       9.31 usec
SI       32768
SF       100.6127685 MHz
WDW      EM
SSB      0
LB       1.00 Hz
GB       0
PC       1.40
  
```

7.372  
7.361  
7.356  
7.355  
7.283  
7.284  
7.267  
7.207  
7.202  
7.181  
7.166  
7.161  
7.147  
7.127  
7.110  
5.079  
5.067  
5.061  
5.049  
5.031  
4.890  
4.683  
4.665  
4.655  
1.589  
1.551  
1.551  
1.531  
1.497  
1.464  
1.362  
1.344  
1.325  
1.307  
1.289  
1.271  
1.141  
1.121  
1.101  
1.078  
1.057  
1.037  
1.014  
0.993  
0.950  
0.934  
0.884

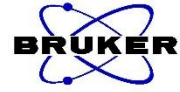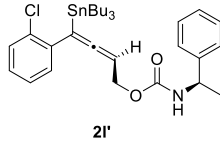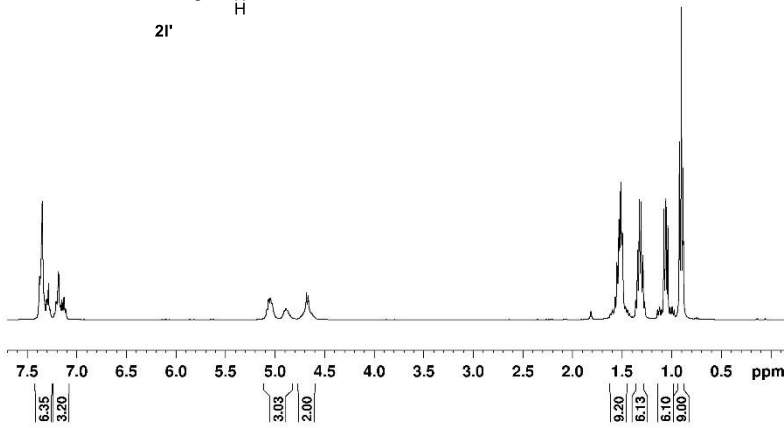

```

NAME      yj1-bk-507-h
EXPNO    10
PROCNO    1
Date_     20190611
Time      17.41
INSTRUM   spect
PROBHD    5 mm PABBO BB/
PULPROG   zg30
TD         65536
SOLVENT   CDCl3
NS         4
DS         0
SWH        8012.826 Hz
FIDRES     0.122266 Hz
AQ         4.0894966 sec
RG         1.14
DN         62.100 usec
DE         6.50 usec
TE         297.7 K
D1         1.0000000 sec
TD0        1
  
```

```

===== CHANNEL f1 =====
SFO1     400.1324710 MHz
NUC1      1H
P1        9.99 usec
SI        65536
SF        400.1320000 MHz
WDW       EM
SSB       0
GB        0
PC        1.00
  
```

202.462  
155.63  
143.64  
137.74  
137.06  
132.96  
126.35  
125.53  
125.12  
125.95  
96.02  
78.01  
63.90  
30.63  
28.39  
27.02  
22.49  
13.90  
11.87

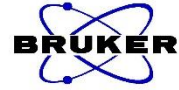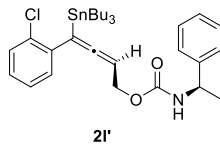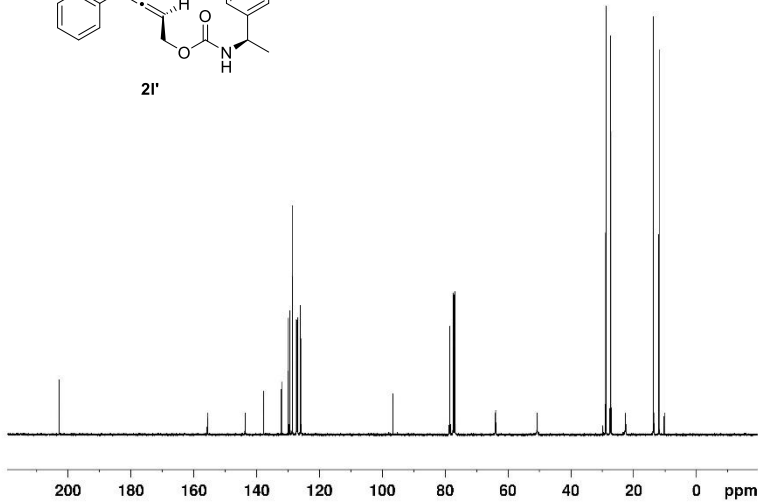

```

NAME      yj1-bk-507-c
EXPNO    1
PROCNO    1
Date_     20190611
Time      18.11
INSTRUM   spect
PROBHD    5 mm PABBO BB/
PULPROG   zgpg30
TD         65536
SOLVENT   CDCl3
NS         4
DS         0
SWH        24038.461 Hz
FIDRES     0.366798 Hz
AQ         1.3631958 sec
RG         197.54
DN         20.800 usec
DE         6.50 usec
TE         299.4 K
D1         2.0000000 sec
D11        0.0300000 sec
TD0        1
  
```

```

===== CHANNEL f1 =====
SFO1     100.6228293 MHz
NUC1     13C
P1        0.31 usec
SI        32768
SF        100.6127695 MHz
WDW       EM
SSB       0
LB        1.00 Hz
GB        0
PC        1.40
  
```

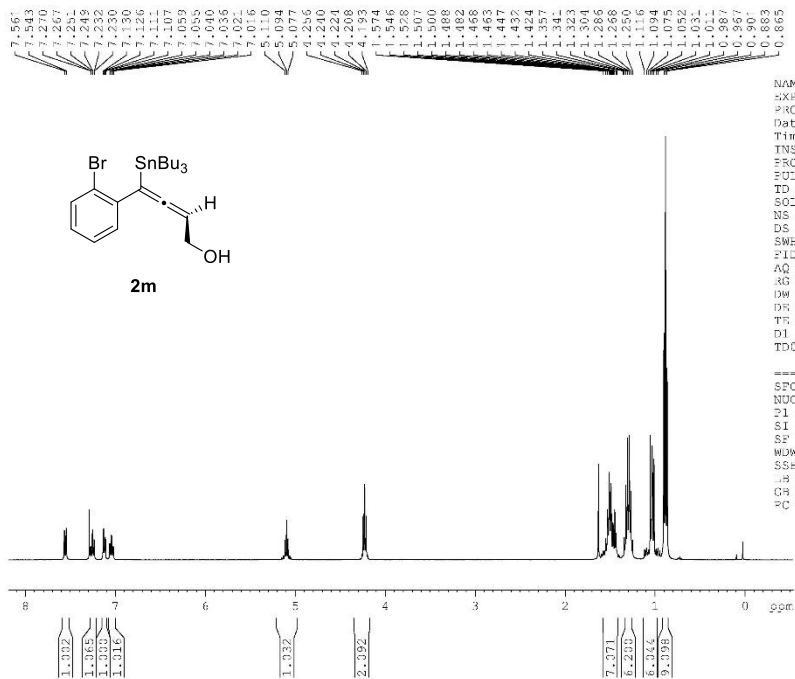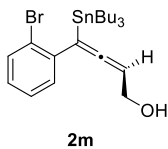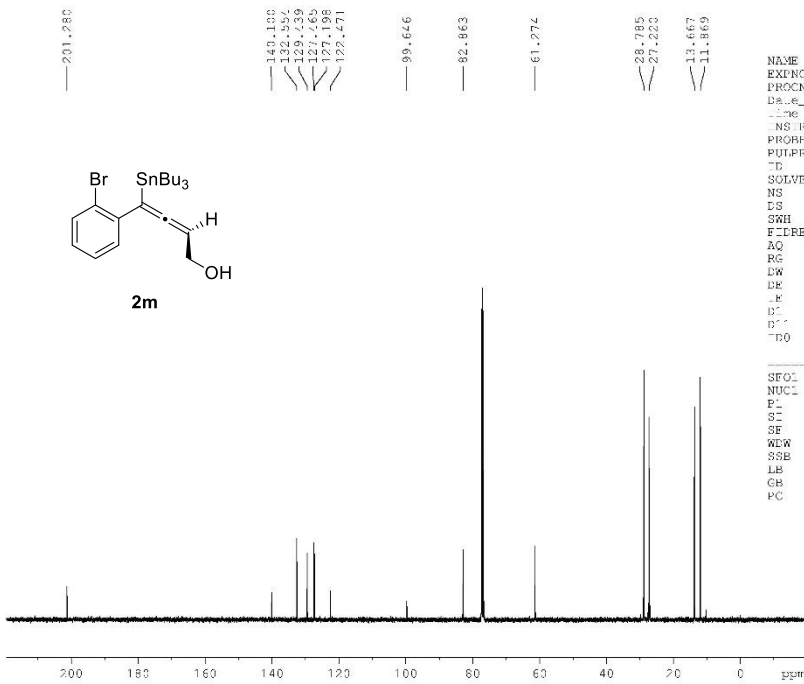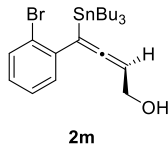



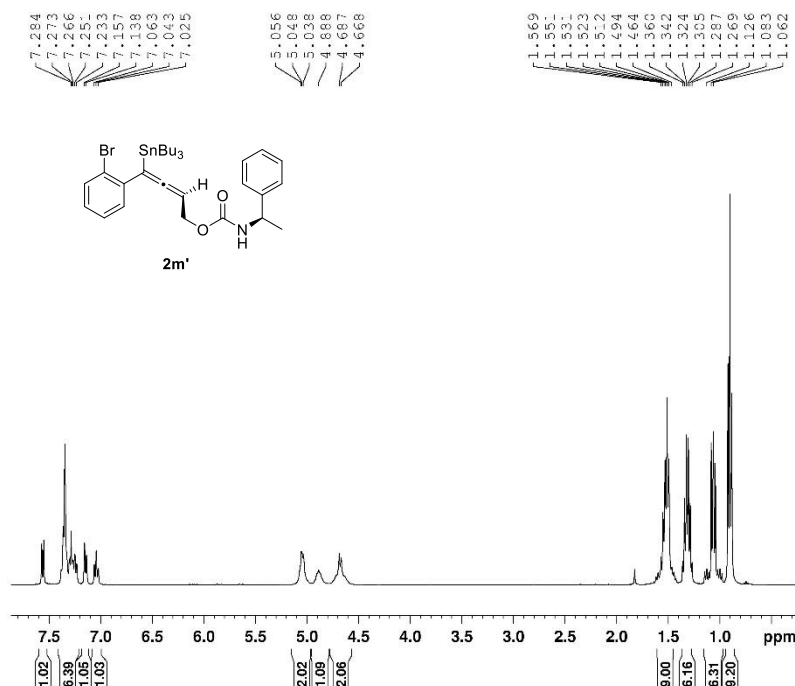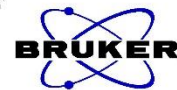

```

NAME      yj1-bk-509-h
EXPNO     10
PROCNO    1
Date_     20190618
Time      18.00
INSTRUM   spect
PROBHD    5 mm PABBO BB/
PULPROG   zg30
TD         65536
SOLVENT   CDCl3
NS         4
DS         0
SWH       6012.820 Hz
FIDRES    0.12766 Hz
AQ         4.0894966 sec
RG         7.74
DW         62.400 usec
DE         6.50 usec
TE         295.8 K
D1         1.00000000 sec
TD0       1

===== CHANNEL f1 =====
SFO1     400.1324710 MHz
NUC1     1H
P1       9.39 usec
SI       65536
SF       400.1300000 MHz
WDW      EM
SSB      0
LB       0.30 Hz
GB       0
PC       1.00

```

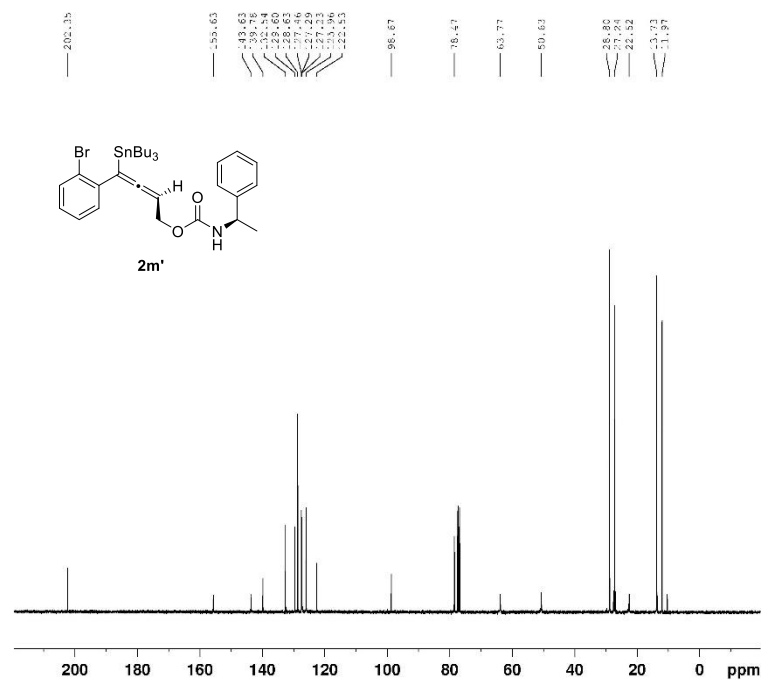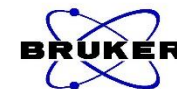

```

NAME      yj1-bk-509-c
EXPNO     11
PROCNO    1
Date_     20190618
Time      18.09
INSTRUM   spect
PROBHD    5 mm PABBO BB/
PULPROG   zgpg30
TD         65536
SOLVENT   CDCl3
NS         4
DS         0
SWH       24038.461 Hz
FIDRES    0.366798 Hz
AQ         1.363398 sec
RG         19.56
DW         20.800 usec
DE         6.50 usec
TE         295.8 K
D1         2.00000000 sec
D11       0.03000000 sec
TD0       1

===== CHANNEL f1 =====
SFO1     100.6228293 MHz
NUC1     13C
P1       9.31 usec
SI       32768
SF       100.6127685 MHz
WDW      EM
SSB      0
LB       1.00 Hz
GB       0
PC       1.40

```

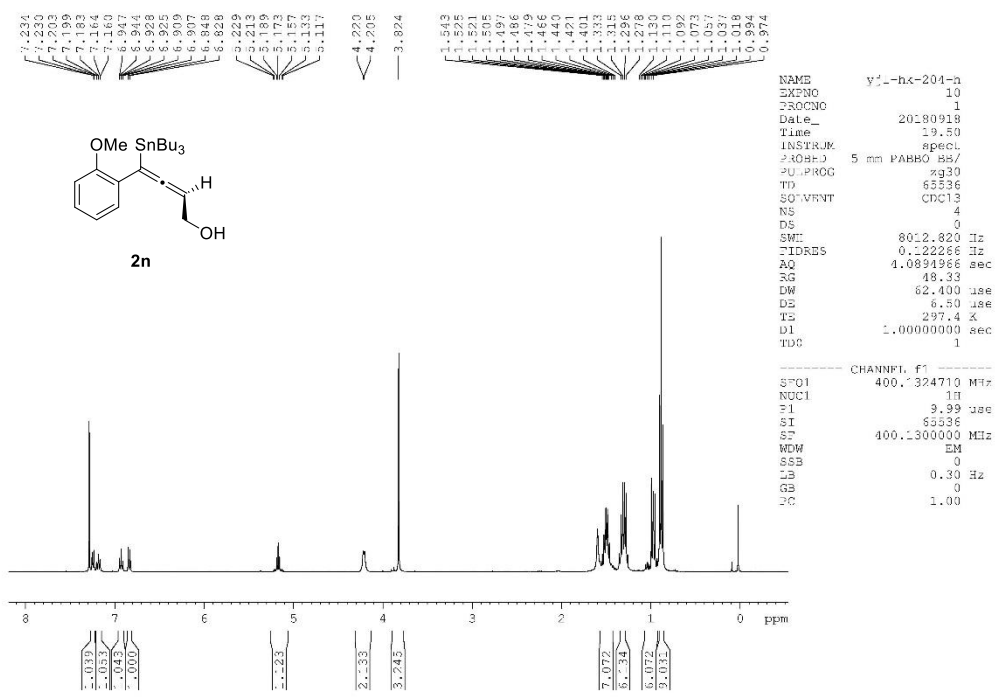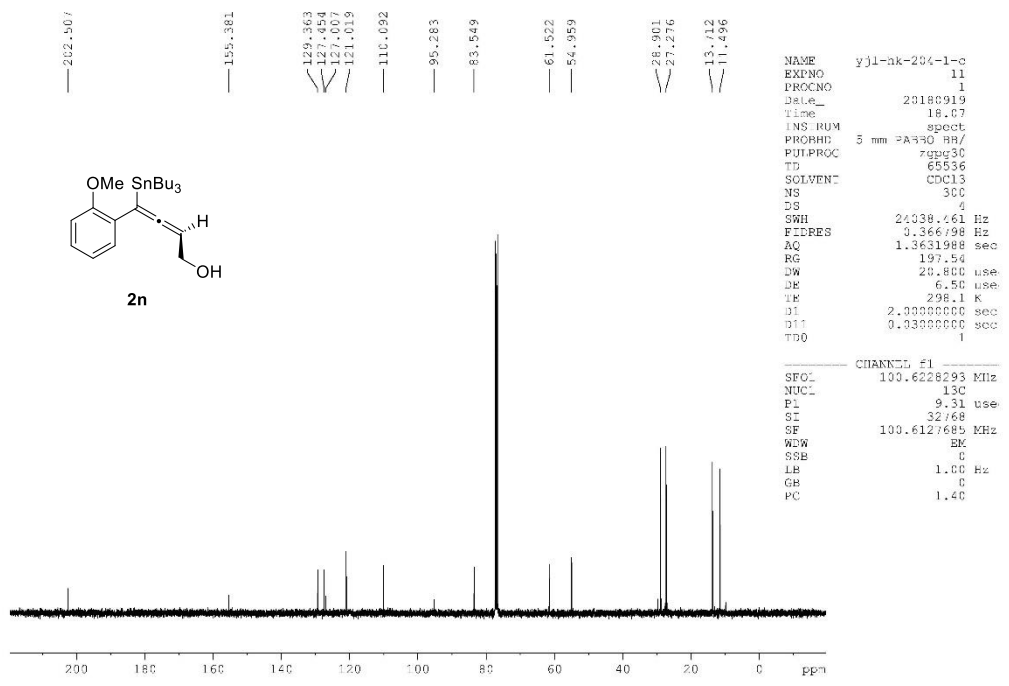

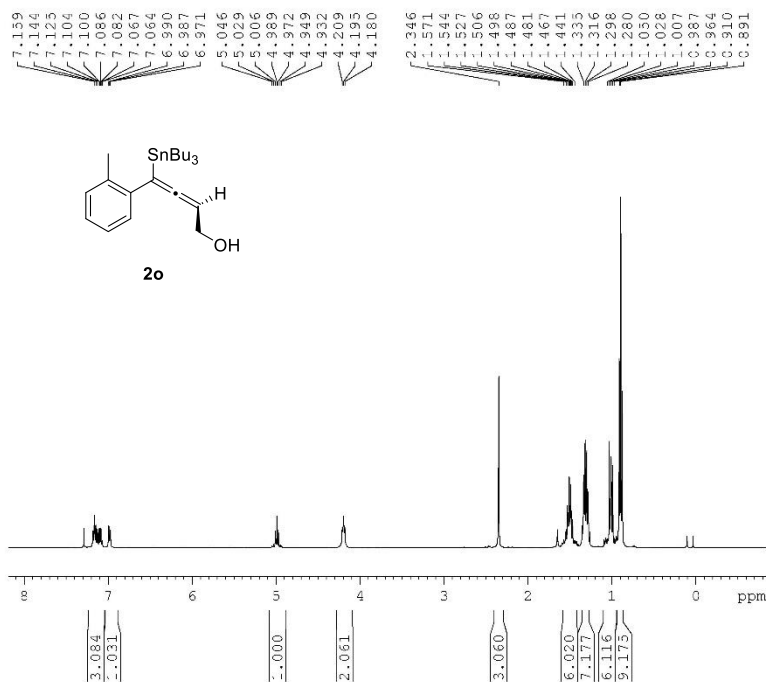

```

NAME      V11-hk-196-n
EXPNO    20
PROCNO   1
Date_    20180928
Time     16.51
INSTRUM  spect
PROBHD   5 mm PABBO BB/
PULPROG  zg30
TD        65536
SOLVENT  CDCl3
NS        4
DS        0
SWH       8012.820 Hz
FIDRES    0.122266 Hz
AQ        4.0894966 sec
RG        30.81
DW        62.400 usec
DE        6.50 usec
TE        296.9 K
D1        1.00000000 sec
TD0       1
  
```

```

----- CHANNEL f1 -----
SFO1     400.1324710 MHz
NUC1      1H
P1        9.99 usec
SI        65536
SF        400.1300000 MHz
WDW       EM
SSB       0
GB        0.30 Hz
PC        1.00
  
```

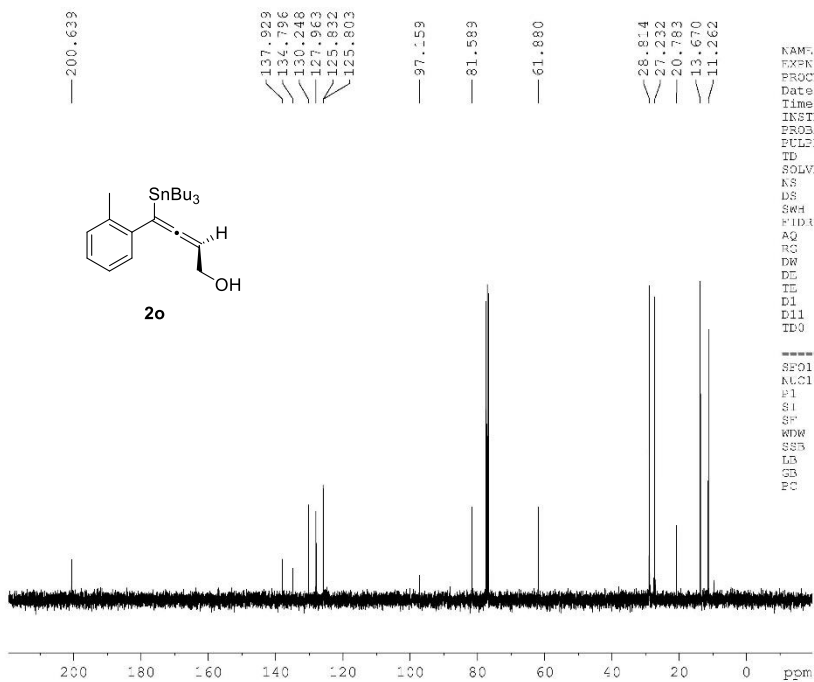

```

NAME      yjl hk 196 o
EXPNO    20
PROCNO   1
Date_    20180928
Time     16.54
INSTRUM  spect
PROBHD   5 mm PABBO BB/
PULPROG  zgpg30
TD        65536
SOLVENT  CDCl3
NS        4
DS        0
SWH       24038.462 Hz
FIDRES    0.366738 Hz
AQ        1.3633988 sec
RG        197.54
DW        20.800 usec
DE        6.50 usec
TE        297.2 K
D1        2.00000000 sec
D11       0.03000000 sec
TD0       1
  
```

```

----- CHANNEL f1 -----
SFO1     100.6228293 MHz
NUC1      13C
P1        9.31 usec
SI        32768
SF        100.6127685 MHz
WDW       FM
SSB       0
GB        1.00 Hz
PC        1.40
  
```



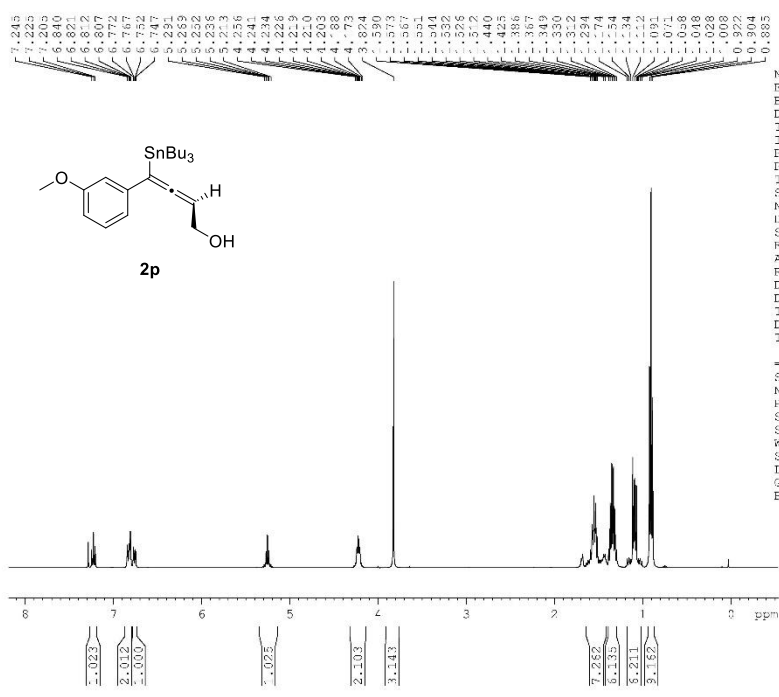

```

NAME      yj1-hk-181-h
EXPNO    1.0
PROCNO   1
Date_    20180914
Time     22.49
INSTRUM  spect
PROBHD   5 mm PABBO BB/
PULPROG  zgpg30
TD        65536
SOLVENT  CDCl3
NS        4
DS        0
SWH       8012.820 Hz
FIDRES    0.122266 Hz
AQ        4.0894966 sec
RG         30.8
LR         62.400 usec
DE         6.30 usec
TE        296.5 K
D1        1.0000000 sec
TD0       1
----- CHANNEL f1 -----
SFO1     400.1324710 MHz
NUC1      1H
P1        9.99 usec
SI        65536
SF        400.1300000 MHz
WDW       EM
SSB       0
LB        0.30 Hz
GB         0
PC        1.00
  
```

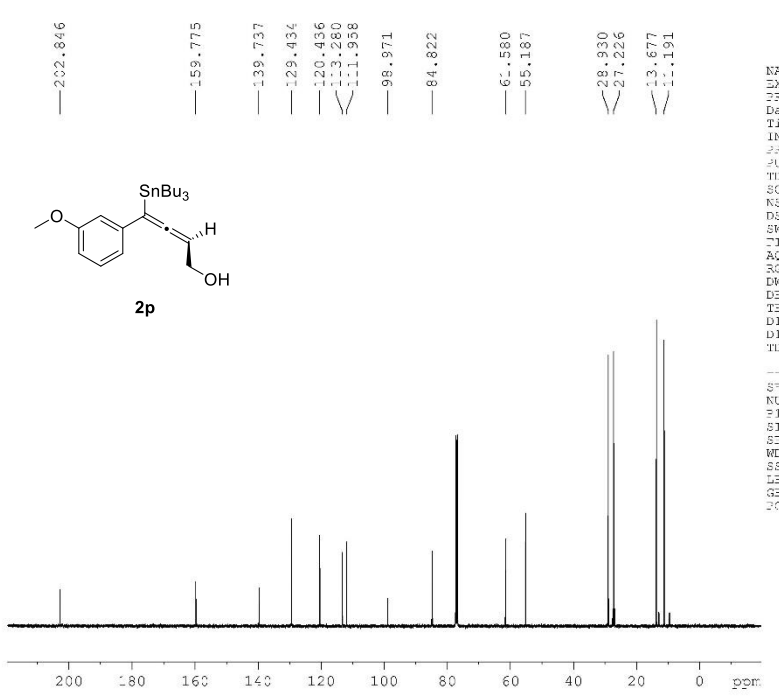

```

NAME      yj1-hk-181-c
EXPNO    11
PROCNO   1
Date_    20180914
Time     23.20
INSTRUM  spect
PROBHD   5 mm PABBO BB/
PULPROG  zgpg30
TD        65536
SOLVENT  CDCl3
NS        4
DS        0
SWH       24038.461 Hz
FIDRES    0.368798 Hz
AQ        1.3831988 sec
RG         37.54
LR         20.800 usec
DE         6.50 usec
TE        297.0 K
D1        2.0000000 sec
D11       0.0300000 sec
HDC      1
----- CHANNEL f1 -----
SFO1     100.6228293 MHz
NUC1     13C
P1        9.21 usec
SI        32768
SF        100.6227880 MHz
WDW       EM
SSB       0
LB        1.00 Hz
GB         0
PC        1.40
  
```

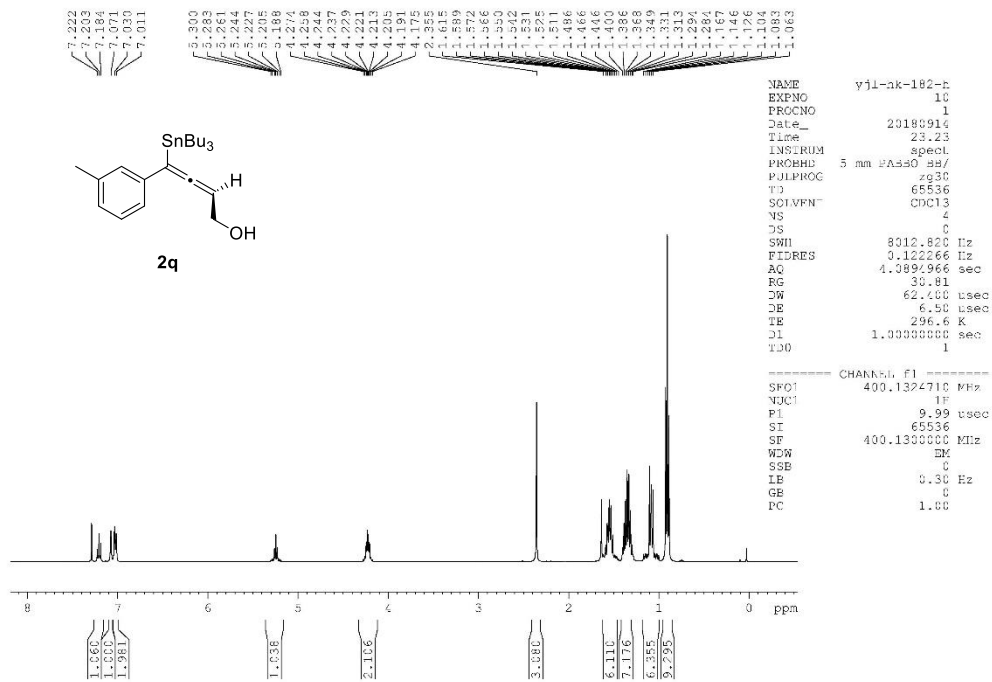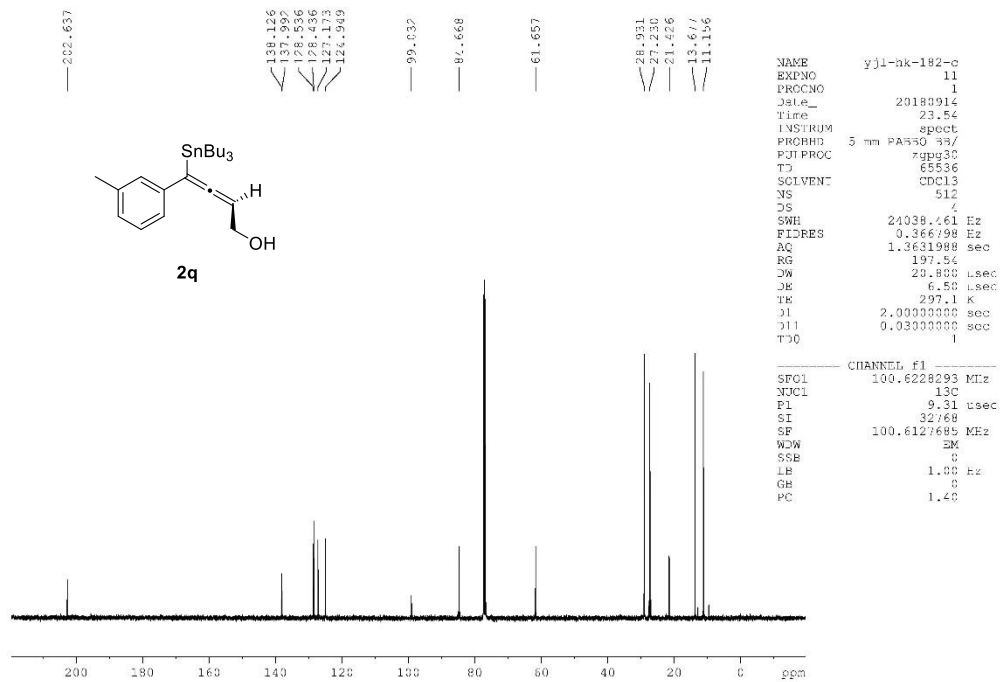

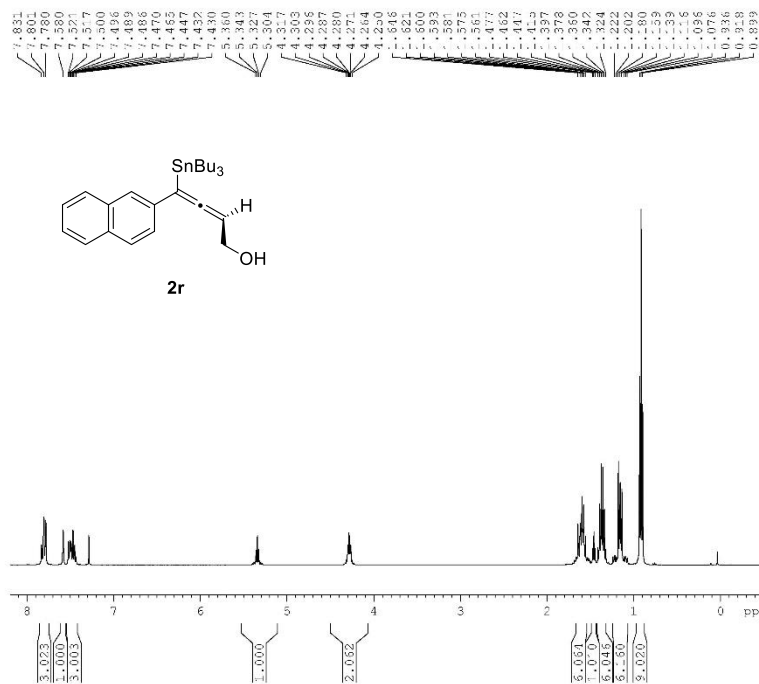

```

NAME      yj1-hk-205-r
EXPNO    1
PROCNO   1
Date_    20180918
Time     18.31
INSTRUM  spect
PROBHD   5 mm PABBO 33/
PULPROG  zg30
TD       65536
SOLVENT  CDCl3
NS       4
DS       0
SWH      8012.920 Hz
FIDRES   0.122266 Hz
AQ       4.0897066 sec
RG       30.81
Dw       62.400 usec
DE       6.50 usec
TE       297.2 K
AQ       1.00000000 sec
SI       1
===== CHANNEL f1 =====
SFO1     400.1324710 MHz
NUC1     13
P1       9.99 usec
SI       65536
SF       400.1300000 MHz
WDW      EM
SSB      0
LB       0.30 Hz
GB       0
PC       1.00
  
```

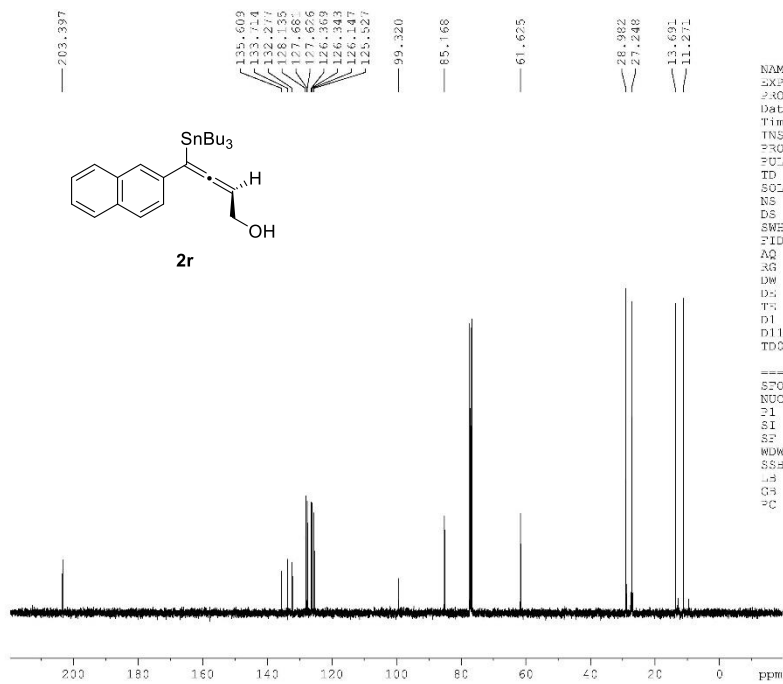

```

NAME      yj1-hk-205-r
EXPNO    1
PROCNO   1
Date_    20180918
Time     18.03
INSTRUM  spect
PROBHD   5 mm PABBO 33/
PULPROG  zgpg30
TD       65536
SOLVENT  CDCl3
NS       100
DS       4
SWH      24039.461 Hz
FIDRES   0.366798 Hz
AQ       1.3631988 sec
RG       297.54
Dw       20.800 usec
DE       6.50 usec
TE       297.2 K
AQ       2.00000000 sec
SI       1
D11      0.03000000 sec
TDC      1
===== CHANNEL f1 =====
SFO1     100.6228293 MHz
NUC1     13C
P1       9.31 usec
SI       32768
SF       100.6227695 MHz
WDW      EM
SSB      0
LB       1.00 Hz
GB       0
PC       1.40
  
```

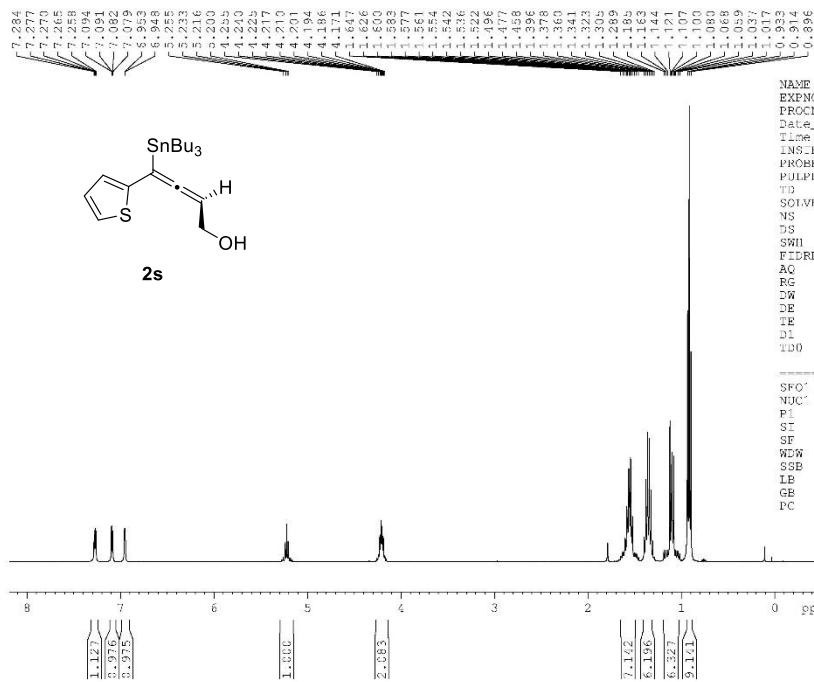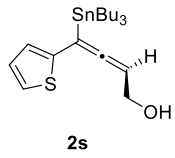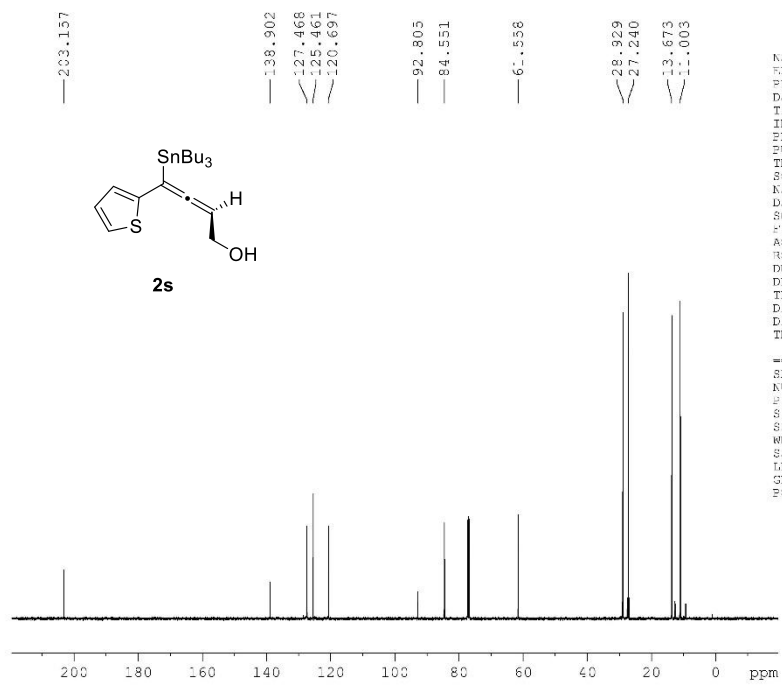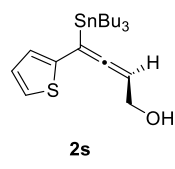



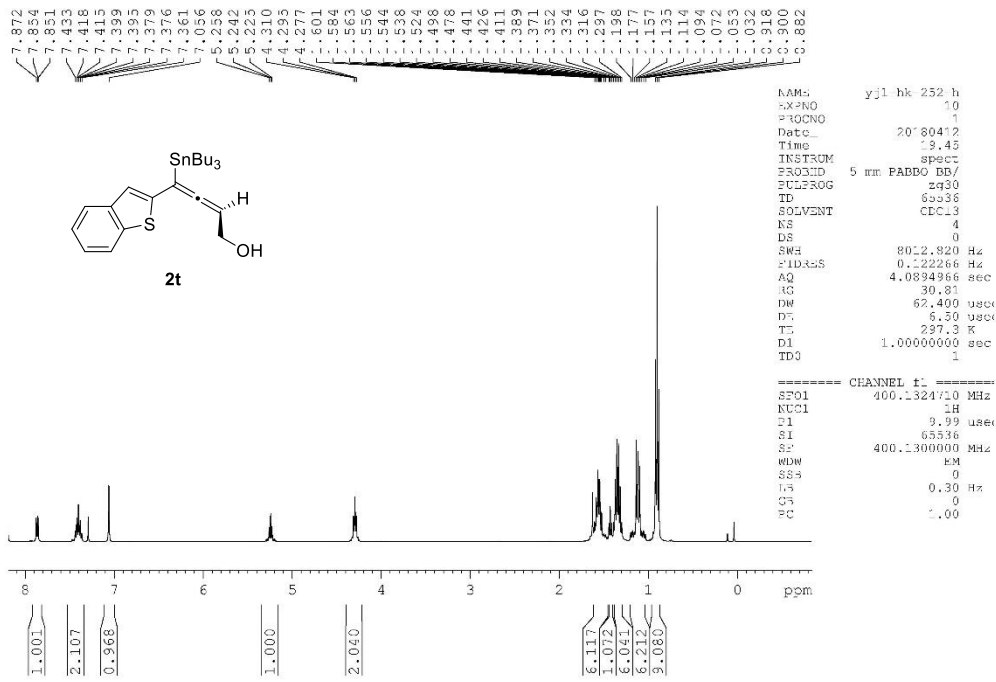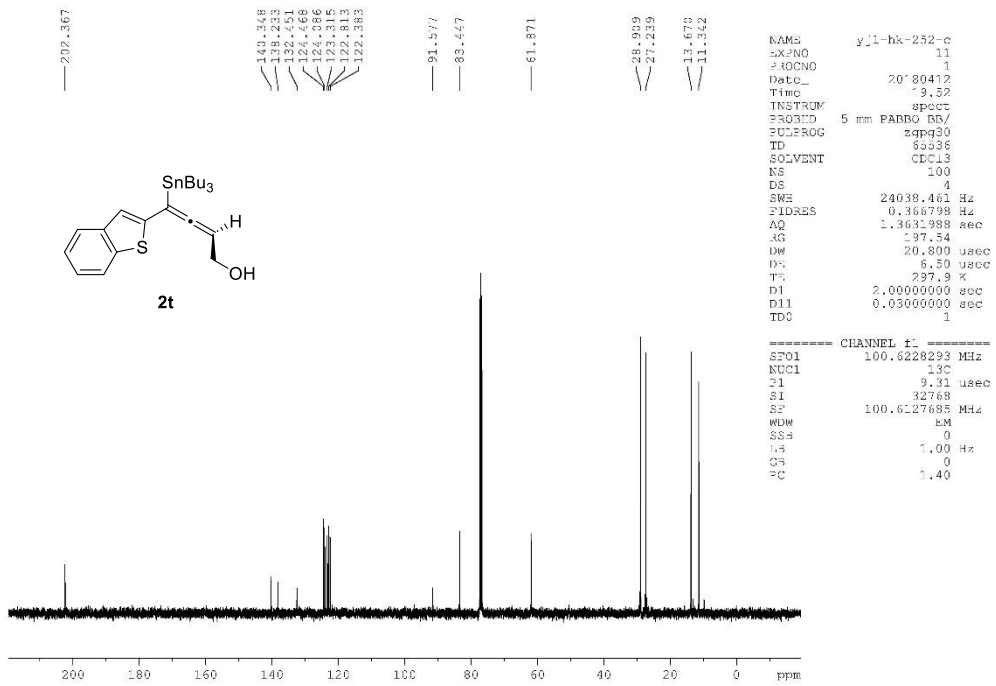

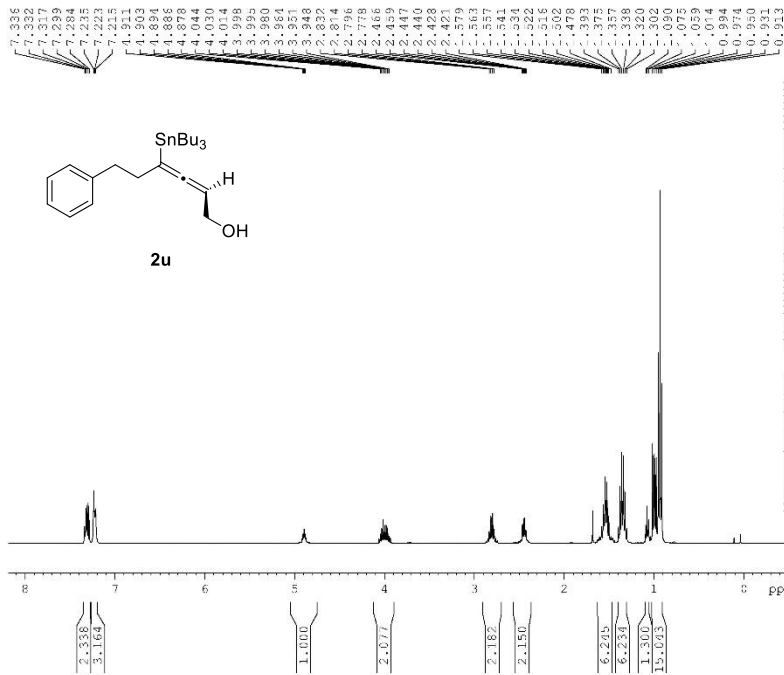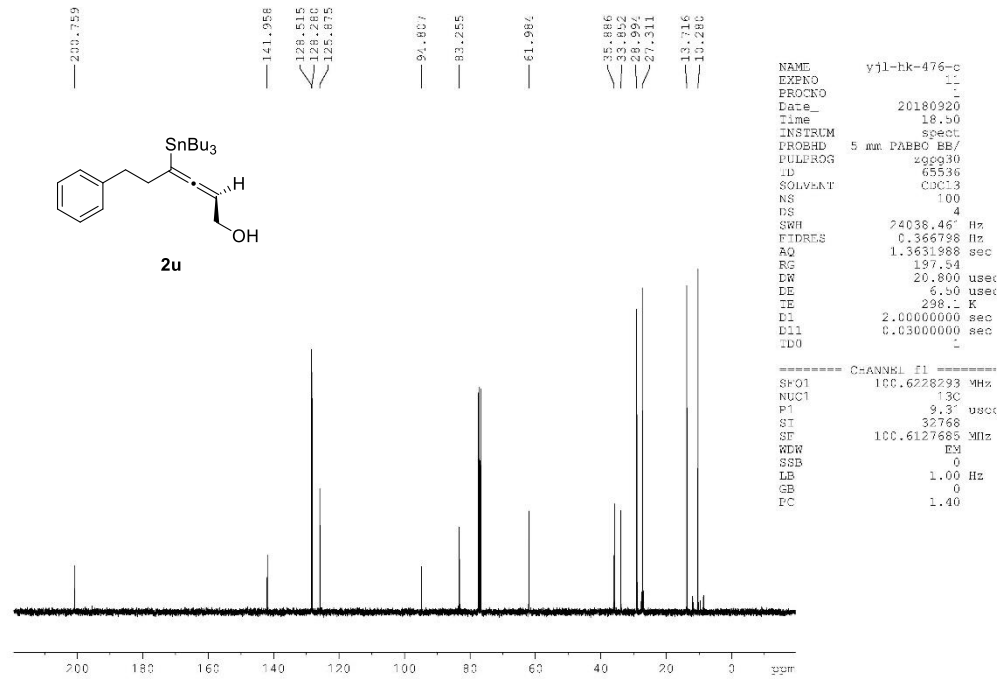

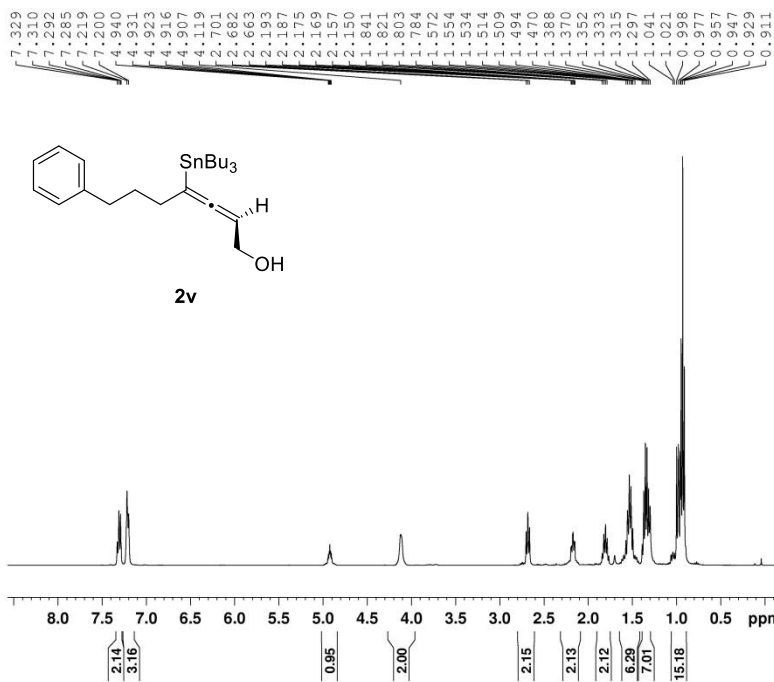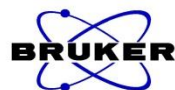

NAME yjl-hk-396-h  
EXPNO 10  
PROCNO 1  
Date\_ 20200916  
Time 19.04  
INSTRUM spect  
PROBHD 5 mm PABBO BB/  
PULPROG zg30  
TD 65536  
SOLVENT CDCl3  
NS 4  
DS 2  
SWH 8012.820 Hz  
FIDRES 0.122366 Hz  
AQ 4.0894966 sec  
RG 12.35  
DW 62.400 usec  
DE 6.50 usec  
TE 297.4 K  
D1 1.00000000 sec  
TD0 1

===== CHANNEL f1 =====  
SF01 400.1324710 MHz  
NUC1 1H  
P1 9.99 usec  
SI 65536  
SF 400.1300000 MHz  
WDW EM  
SSB 0  
LB 0.30 Hz  
GB 0  
PC 1.00

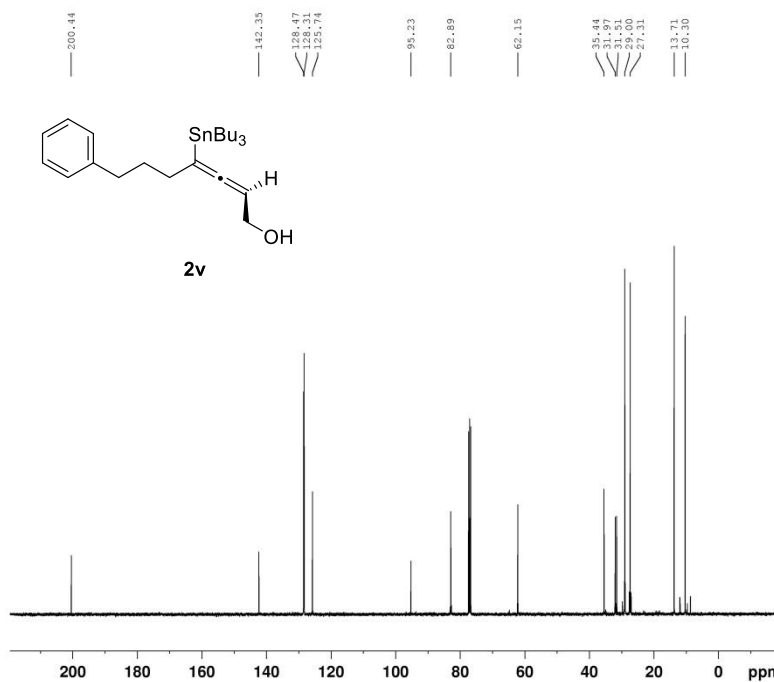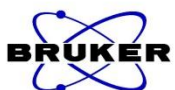

NAME yjl-hk-396-c  
EXPNO 11  
PROCNO 1  
Date\_ 20200916  
Time 19.35  
INSTRUM spect  
PROBHD 5 mm PABBO BB/  
PULPROG zgpg30  
TD 65536  
SOLVENT CDCl3  
NS 512  
DS 2  
SWH 24038.461 Hz  
FIDRES 0.366798 Hz  
AQ 1.3631988 sec  
RG 197.54  
DW 20.800 usec  
DE 6.50 usec  
TE 298.0 K  
D1 2.00000000 sec  
D11 0.03000000 sec  
TD0 1

===== CHANNEL f1 =====  
SF01 100.6228293 MHz  
NUC1 13C  
P1 9.31 usec  
SI 32768  
SF 100.6127685 MHz  
WDW EM  
SSB 0  
LB 1.00 Hz  
GB 0  
PC 1.40

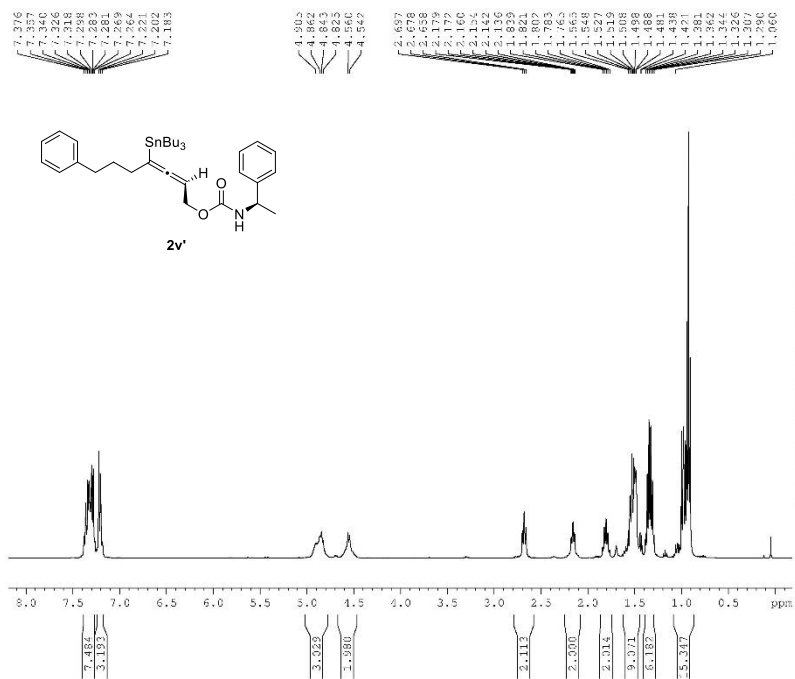

```

NAME      yj1-hk-474-h-3
EXPNO    10
PROCNO   1
Date_    20181016
Time     12.43
INSTRUM  spect
PROBHD   5 mm F43BO DD/
PULPROG  zg30
TD        65536
SOLVENT  CDCl3
NS        4
DS        0
SWH       8012.870 Hz
FIDRES    0.122266 Hz
AQ        4.0894966 sec
RG        39.41
DW        62.400 usec
DE        6.50 usec
TE        297.8 K
D1        1.0000000 sec
D0        1

===== CHANNEL f1 =====
SFO1     400.1324710 MHz
NUC1      1H
P1        9.99 usec
SI        65536
SF        400.1300000 MHz
WDW       EM
SSB       0
LB        0.30 Hz
GB        0
PC        1.00
  
```

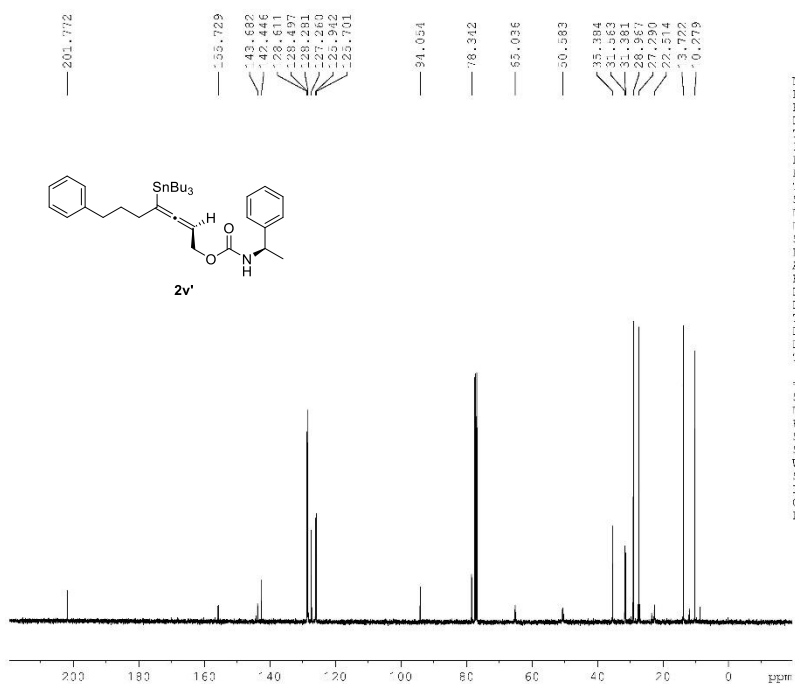

```

NAME      YJL-HK-474-C-3
EXPNO    10
PROCNO   1
Date_    20181016
Time     17.59
INSTRUM  spect
PROBHD   5 mm F43BO DD/
PULPROG  zgpg30
TD        65536
SOLVENT  CDCl3
NS        320
DS        4
SWH       24038.461 Hz
FIDRES    0.365798 Hz
AQ        1.3381988 sec
RG        197.54
DW        20.800 usec
DE        6.50 usec
TE        298.5 K
D1        2.0000000 sec
D11       0.0300000 sec
T0C       1

===== CHANNEL f1 =====
SFO1     100.6228293 MHz
NUC1      13C
P1        9.31 usec
SI        32768
SF        100.6127685 MHz
WDW       EM
SSB       0
LB        1.00 Hz
GB        0
PC        1.40
  
```

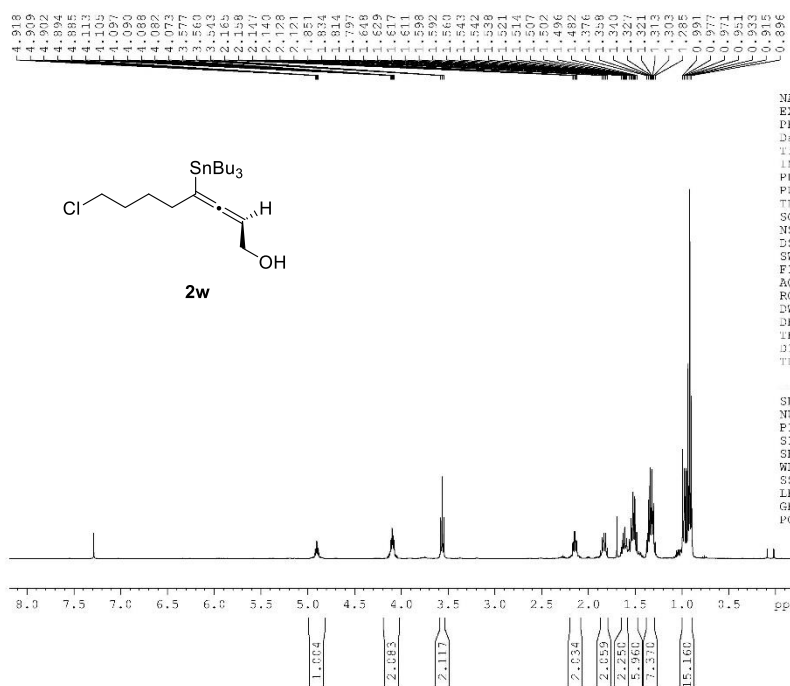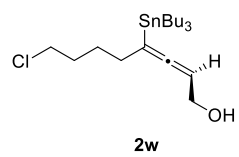

```

NAME      yjl-ak-477-e
EXPNO     10
PROCNO    1
Date_     20180920
Time      18.53
INSTRUM   spect
PROBHD    5 mm PABBO HH/
PULPROG   zg30
TD         65536
SOLVENT   CDCl3
NS         2
DS         0
SWH        8012.820 Hz
FIDRES     0.122266 Hz
AQ         4.3894966 sec
RG         21.43
DW         62.400 usec
DE         6.50 usec
TE         297.5 K
D1         1.3000000 sec
D11        1
TDO        1

----- CHANNEL f1 -----
SFO1      400.1324710 MHz
NUC1       13C
P1         9.99 usec
SI         65536
SF         400.1300000 MHz
WDW        EM
SSB        0
LB         0.30 Hz
GB         0
PC         1.00
  
```

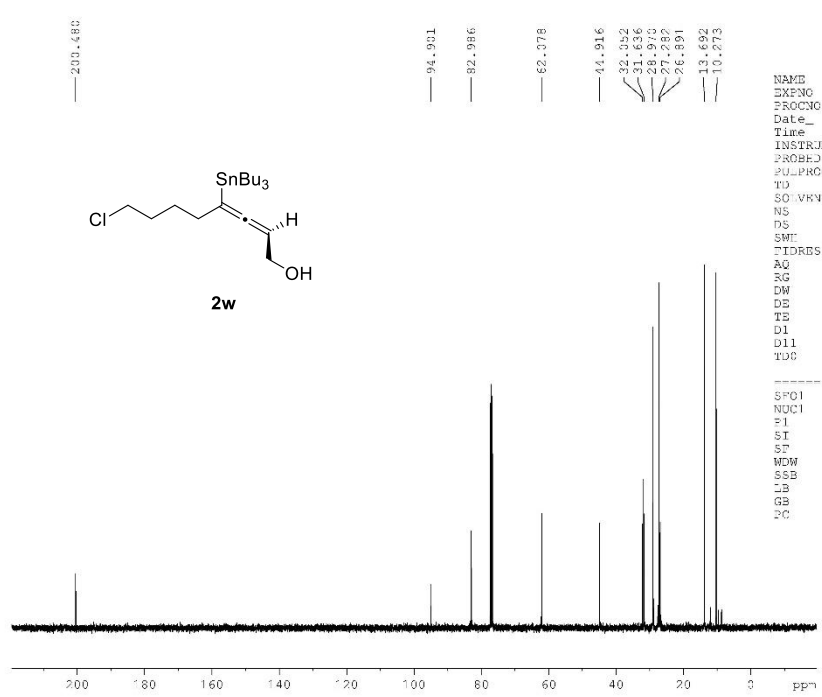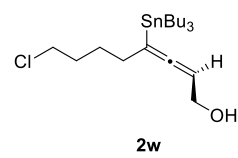

```

NAME      yjl-hx-477-e
EXPNO     11
PROCNO    1
Date_     20180920
Time      19.00
INSTRUM   spect
PROBHD    5 mm PABBO BB/
PULPROG   zgpg30
TD         65536
SOLVENT   CDCl3
NS         100
DS         4
SWH        24038.461 Hz
FIDRES     0.365798 Hz
AQ         1.3631988 sec
RG         197.54
DW         20.800 usec
DE         6.50 usec
TE         298.3 K
D1         2.0000000 sec
D11        0.0300000 sec
TDO        1

----- CHANNEL f1 -----
SFO1      100.6228293 MHz
NUC1       13C
P1         9.31 usec
SI         32768
SF         100.6127585 MHz
WDW        EM
SSB        0
LB         1.00 Hz
GB         0
PC         1.40
  
```

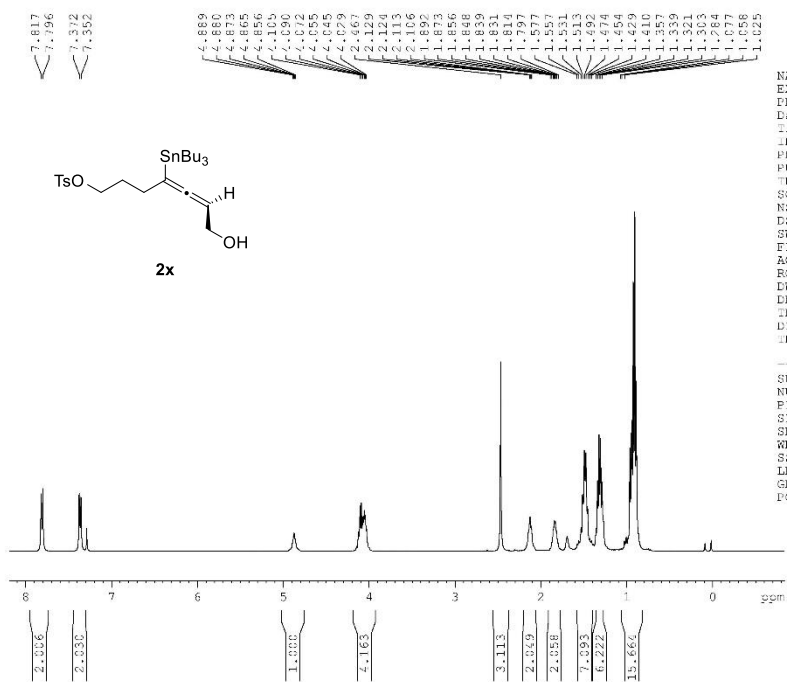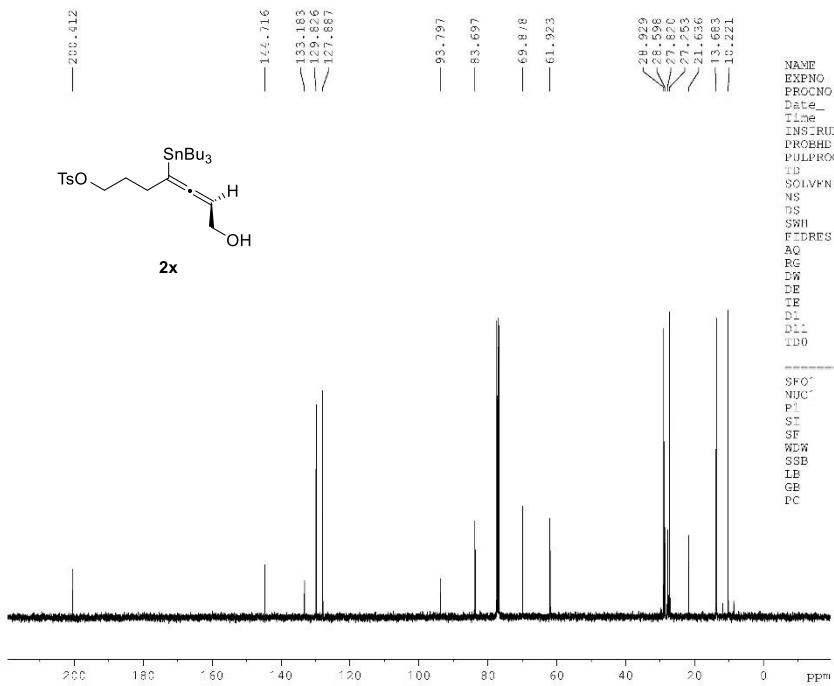

7.809  
7.788  
7.769  
7.539  
7.538  
7.532  
7.265  
7.276  
7.262  
4.852  
4.783  
4.776  
4.460  
4.445  
4.441  
4.110  
4.095  
4.082  
2.458  
2.120  
2.112  
2.102  
2.095  
2.084  
2.077  
2.077  
1.837  
1.826  
1.828  
1.504  
1.489  
1.472  
1.451  
1.427  
1.335  
1.337  
1.318  
1.300  
1.282  
1.264  
1.007  
0.987  
0.964  
0.922  
0.904  
0.886  
0.861

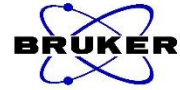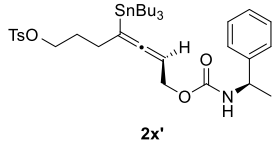

```

NAME      yj1-hk-446-h
EXPNO     10
PROCNO    1
Date_     20180824
Time      17.50
INSTNUM   spect
PROBHD    5 mm PABBO BB/
PULPROG   zgpg30
TD         65536
SOLVENT   CDCl3
NS         4
DS         0
SWH        8012.820 Hz
FIDRES     0.122255 Hz
AQ         4.0894955 sec
RG         21.43
DW         62.400 usec
DE         5.30 usec
TE         298.8 K
D1         1.0000000 sec
D11        1
TD0        1

===== CHANNEL f1 =====
SFO1      400.1324710 MHz
NUC1      1H
P1         9.99 usec
SI         65536
SF         400.1300000 MHz
WWSB      0
SFB        0
LB         0.30 Hz
GB         0
PC         1.00
  
```

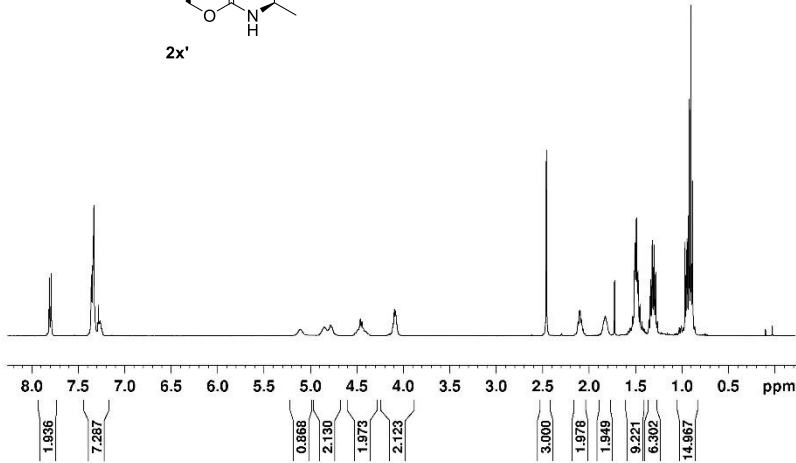

201.47  
 135.63  
 117.68  
 141.76  
 133.22  
 132.61  
 131.88  
 127.23  
 125.50  
 93.22  
 79.24  
 70.42  
 64.37  
 50.66  
 28.00  
 27.48  
 27.40  
 22.54  
 21.62  
 13.68  
 10.21

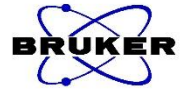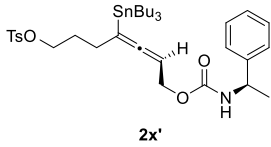

```

NAME      yj1-hk-446-h
EXPNO     11
PROCNO    1
Date_     20180824
Time      18.49
INSTNUM   spect
PROBHD    5 mm PABBO BB/
PULPROG   zgpg30
TD         65536
SOLVENT   CDCl3
NS         1024
DS         4
SWH        24038.451 Hz
FIDRES     0.365798 Hz
AQ         1.3631988 sec
RG         197.54
DW         20.800 usec
DE         5.50 usec
TE         299.5 K
D1         2.0000000 sec
D11        0.0300000 sec
TD0        1

===== CHANNEL f1 =====
SFO1      100.6228293 MHz
NUC1      13C
P1         9.31 usec
SI         32768
SF         100.6127685 MHz
WWSB      0
SFB        0
LB         1.00 Hz
GB         0
PC         1.40
  
```

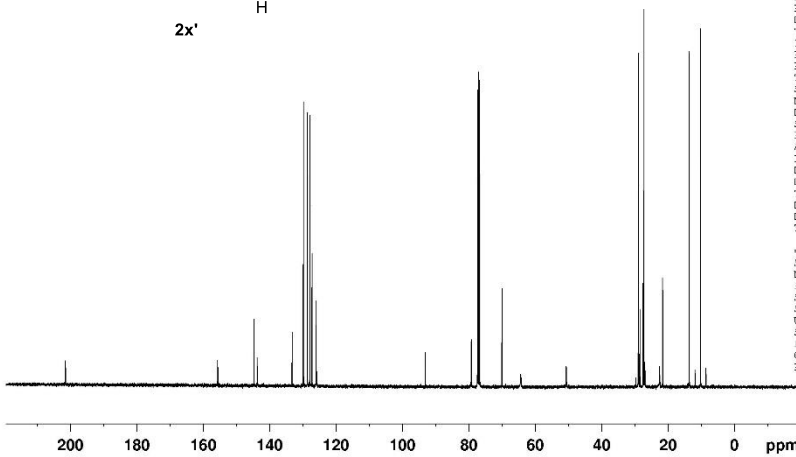

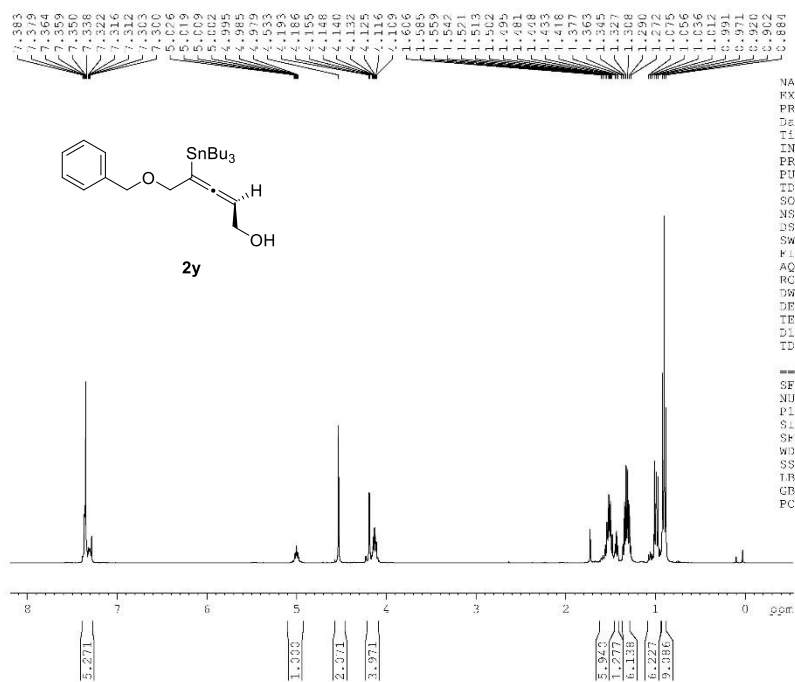

```

NAME yj1-hk-461-b
EXPNO 10
PROCNO 1
Date_ 20180912
Time 21.28
INSTRUM spect
PROBHD 5 mm PAB30 BB/
PULPROG zg30
TD 65536
SOLVENT CDCl3
NS 4
DS 4
SWH 8012.820 Hz
FIDRES 0.122266 Hz
AQ 4.3894966 sec
RG 30.81
BW 62.400 usec
DE 6.50 usec
TE 297.6 K
D1 1.0000000 sec
TD0 1

===== CHANNEL f1 =====
SFO1 400.1324710 MHz
NUC1 1H
P1 9.99 usec
PL 0.00 dB
SF 400.1324710 MHz
WDW EM
SSB 0
LB 0.30 Hz
GB 0
PC 1.00
  
```

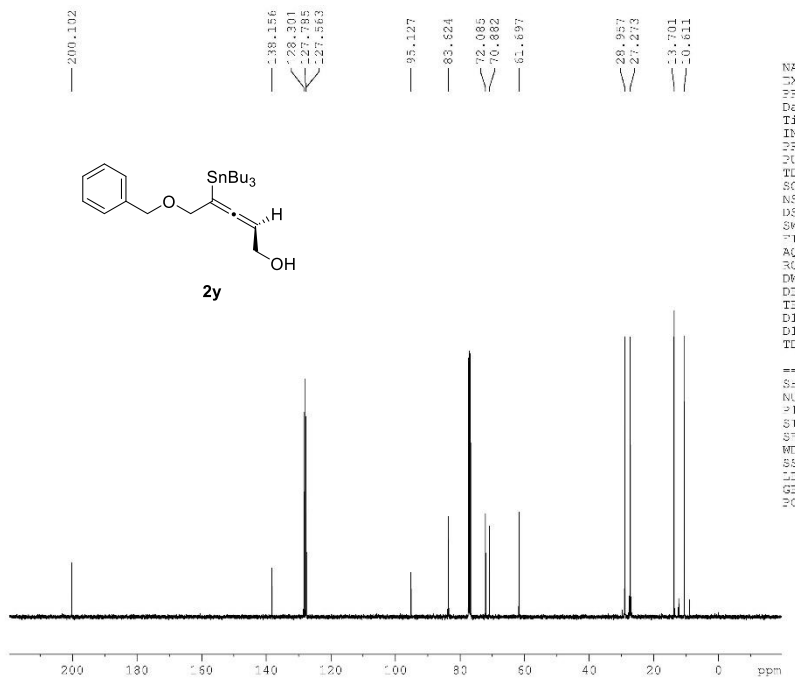

```

NAME yj1-hk-461-c
EXPNO 11
PROCNO 1
Date_ 20180912
Time 21.58
INSTRUM spect
PROBHD 5 mm PAB30 BB/
PULPROG zgpg30
TD 65536
SOLVENT CDCl3
NS 4
DS 4
SWH 24038.461 Hz
FIDRES 0.366798 Hz
AQ 1.3631988 sec
RG 197.54
BW 20.800 usec
DE 6.50 usec
TE 298.2 K
D1 2.0000000 sec
D11 0.0300000 sec
TDC 1

===== CHANNEL f1 =====
SFO1 100.6228293 MHz
NUC1 13C
P1 9.31 usec
PL 0.00 dB
SF 100.6228293 MHz
WDW EM
SSB 0
LB 1.00 Hz
GB 0
PC 1.40
  
```



5.107  
5.089  
5.091  
5.082  
5.074  
5.066  
4.185  
4.184  
4.148  
4.132  
4.115  
2.586  
2.582  
2.580  
2.530  
2.526  
2.515  
2.488  
2.474  
2.465  
2.442  
2.436  
2.416  
2.407  
2.399  
2.391  
2.383  
2.373  
2.35  
2.32  
1.846  
1.840  
1.824  
1.592  
1.561  
1.547  
1.526  
1.507  
1.487  
1.467  
1.442  
1.438  
1.378  
1.360  
1.341  
1.323  
1.287  
1.277  
1.083  
1.063  
1.043  
1.020  
0.989  
0.978  
0.900

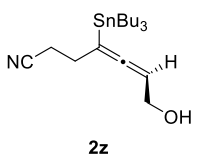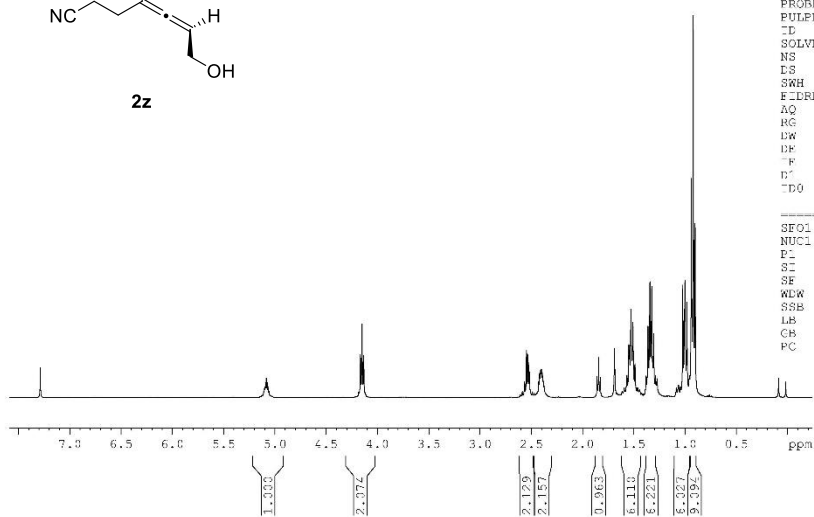

```

NAME      yj1-hk-470-h
EXPNO    10
PROCNO   1
Date_    20180913
Time     6.45
INSTRUM  spect
PROBHD   5 mm PABBO BB/
PULPROG  zg30
TD       65536
DE       65536
SOLVENT  CDCl3
NS       4
DS       0
SWH      8012.820 Hz
FIDRES   0.122266 Hz
AQ       4.0894966 sec
RG       30.81
DW       62.400 use
DK       6.50 use
F        297.2 K
E1       1.00000000 scc
TD0      1

===== CHANNEL f1 =====
SFO1     400.1324710 MHz
NUC1     1H
P1       9.99 use
S1       65536
SF       400.1300000 MHz
WDW      EM
SSB      0
LB       0.30 Hz
GB       0
PC       1.00

```

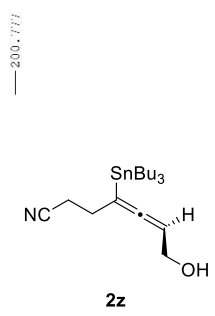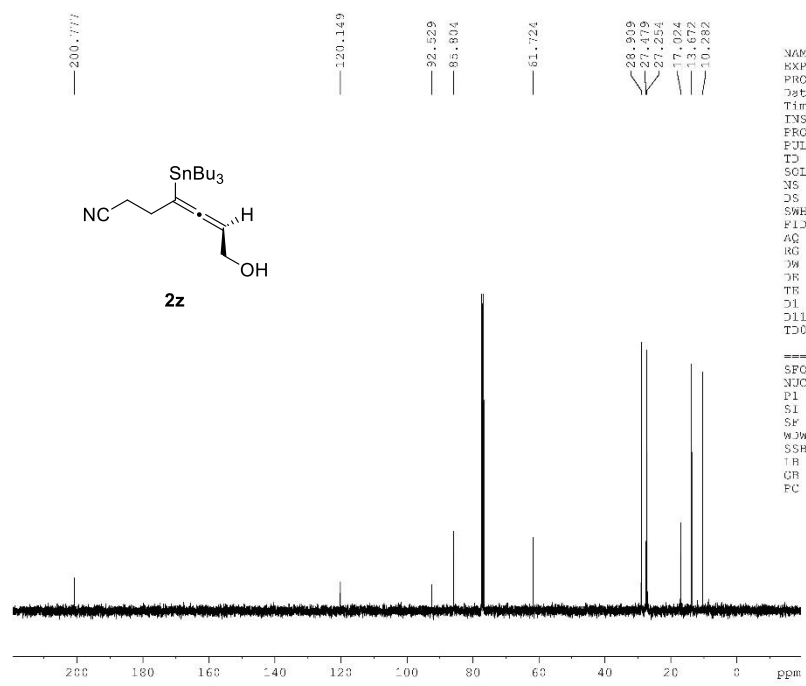

```

NAME      yj1-hk-470-c
EXPNO    11
PROCNO   1
Date_    20180913
Time     3.46
INSTRUM  spect
PROBHD   5 mm PABBO B3/
PULPROG  zgpg30
TD       65536
SOLVENT  CDCl3
NS       80
DS       4
SWH      24038.461 Hz
FIDRES   0.366798 Hz
AQ       1.3631988 sec
RG       197.54
DW       20.800 use
DK       6.50 use
F        297.2 K
E1       2.00000000 scc
D11      0.03000000 sec
TD0      1

===== CHANNEL f1 =====
SFO1     100.6228293 MHz
NUC1     13C
P1       9.31 use
S1       32768
SF       100.6127685 MHz
WDW      EM
SSB      0
LB       1.00 Hz
GB       0
PC       1.40

```

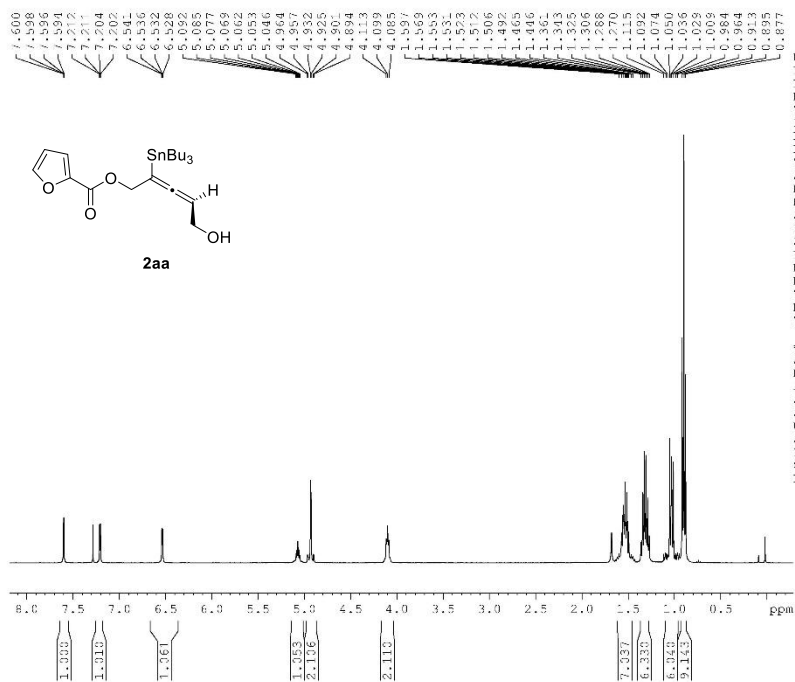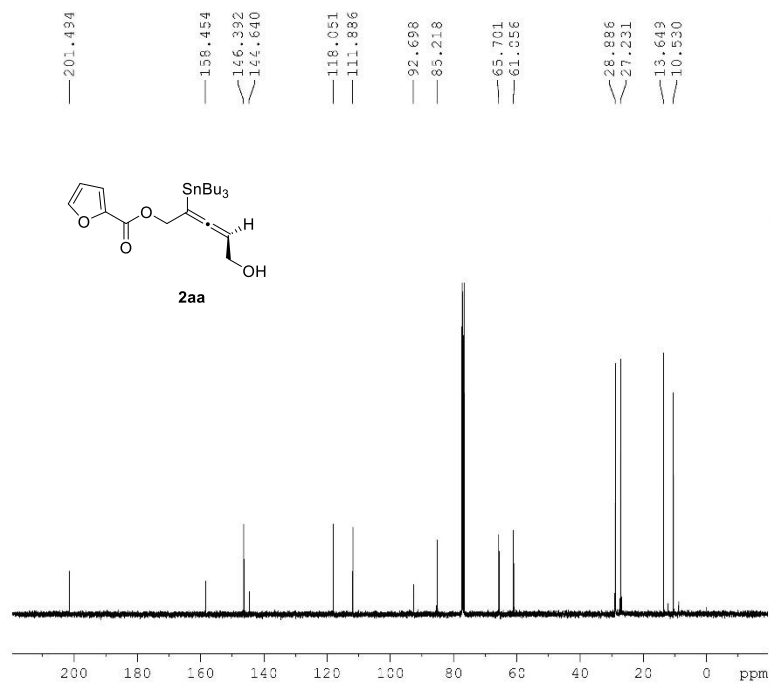

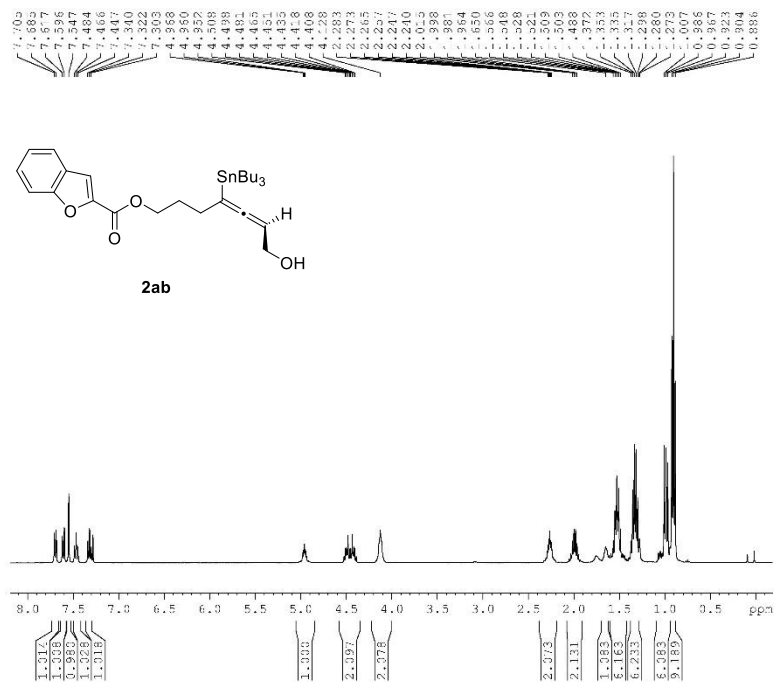

```

NAME      yj1-hk-469-h
EXPNO    10
PROCNO   1
Date_     20180912
Time     22.02
INSTRUM  spect
PROBHD   5 mm PABBO BB/
PULPROG  zgpg30
TD        65536
SOLVENT  CDCl3
NS        4
DS        0
SWH       8012.820 Hz
FIDRES   0.122266 Hz
AQ        4.0894966 sec
RG        30.81
DW        62.400 usec
DE        6.50 usec
TE        297.7 K
D1        1.00000000 sec
TD0       1

===== CHANNEL f1 =====
SF01     400.1324710 MHz
NUC1     1H
P1       9.99 usec
SI       65536
SF       400.1300000 MHz
WDW      EM
SSB      0
LB       0.30 Hz
GB       0
PC       1.00

```

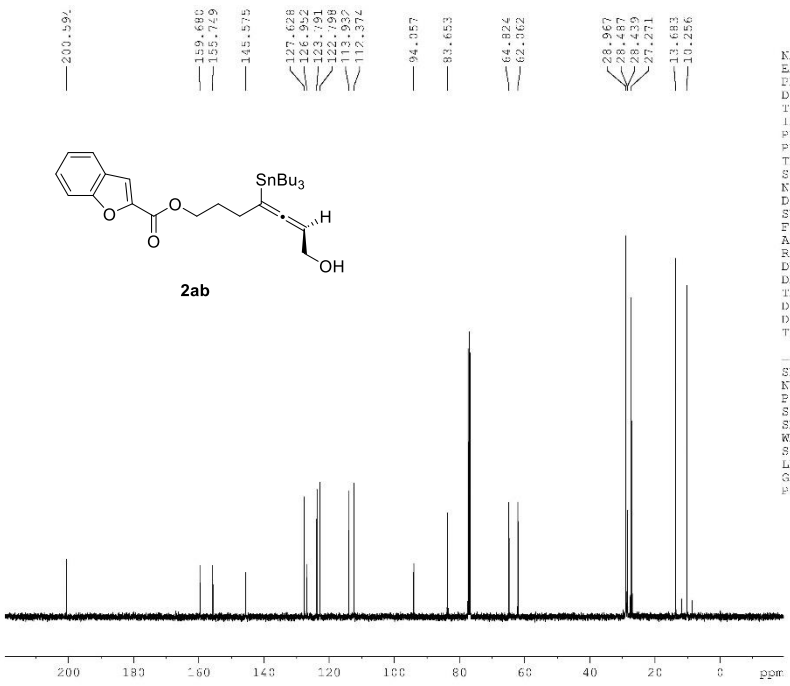

```

NAME      yj1-hk-469-a-1
EXPNO    10
PROCNO   1
Date_     20180913
Time     17.42
INSTRUM  spect
PROBHD   5 mm PABBO BB/
PULPROG  zgpg30
TD        65536
SOLVENT  CDCl3
NS        4
DS        0
SWH       24038.461 Hz
FIDRES   0.366798 Hz
AQ        1.3631908 sec
RG        197.54
DW        20.800 usec
DE        6.50 usec
TE        297.7 K
D1        2.00000000 sec
D11      0.03000000 sec
TD0       1

===== CHANNEL f1 =====
SF01     100.6228293 MHz
NUC1     13C
P1       9.31 usec
SI       32768
SF       100.6127680 MHz
WDW      EM
SSB      0
LB       1.00 Hz
GB       0
PC       1.40

```



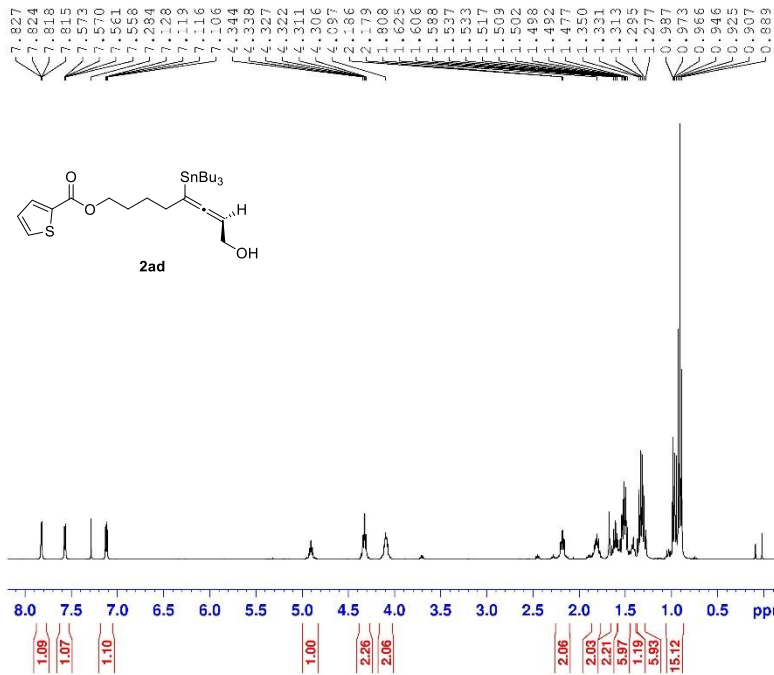

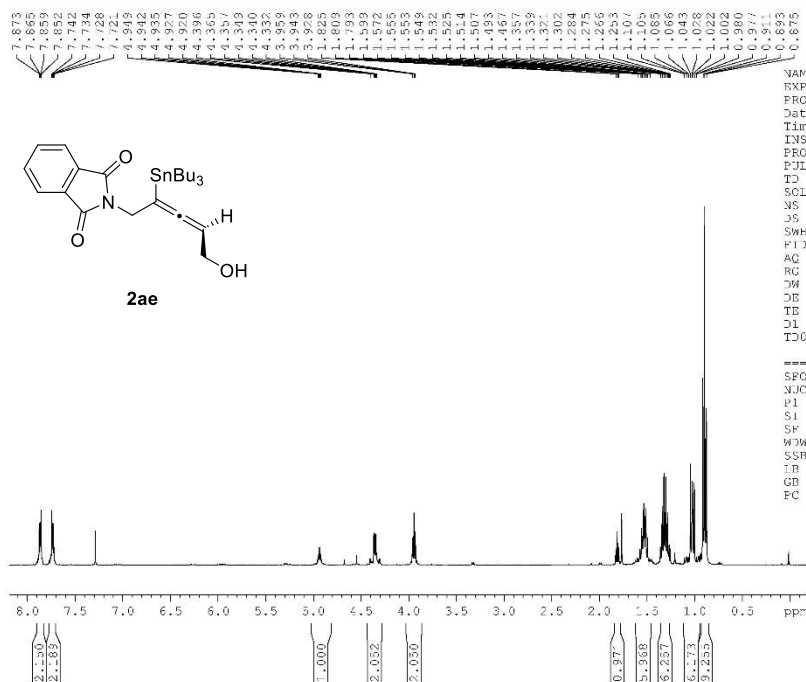

```

NAME      yj1-hk-479-h
EXPNO     13
PROCNO    1
Date_     20180920
Time      19.13
INSTRUM   spect
PROBHD    5 mm PABBO BB/
PULPROG   zgpg30
TD         65536
SOLVENT   CDCl3
NS         4
DS         8
SWH        8012.820 Hz
FIDRES     0.122266 Hz
AQ         4.0894966 sec
RG         30.81
DW         62.400 usec
DE         6.50 usec
TE         297.5 K
D1         1.00000000 sec
D11        1
TD0        1

----- CHANNEL f1 -----
SFO1      400.1324710 MHz
NUC1      1H
P1         9.99 usec
S1         65536
SF         400.1300000 MHz
W3M       EM
SSB        0
LB         0.30 Hz
GB         0
PC         1.00

```

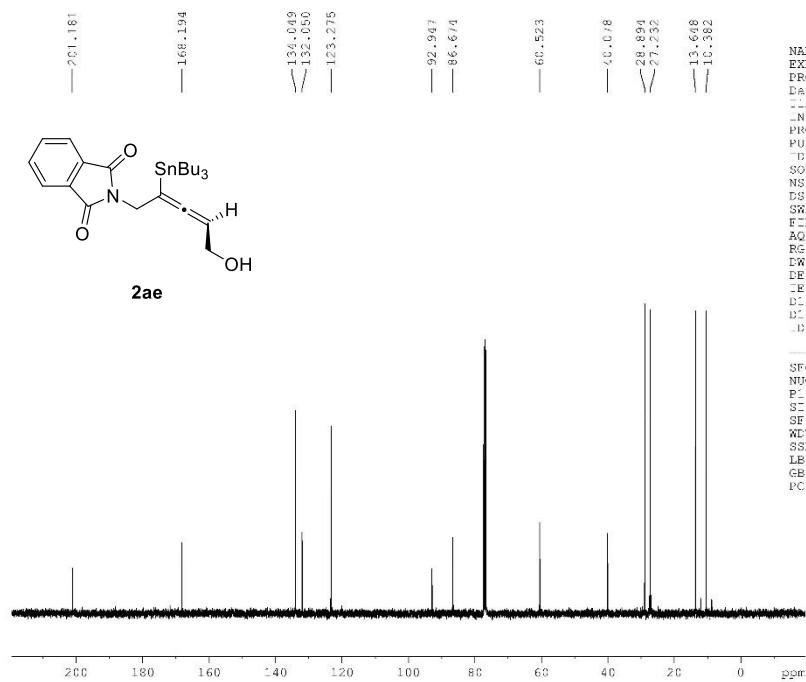

```

NAME      yj1-hk-479-c
EXPNO     11
PROCNO    1
Date_     20180920
Time      19.20
INSTRUM   spect
PROBHD    5 mm PABBO BB/
PULPROG   zgpg30
TD         65536
SOLVENT   CDCl3
NS         100
DS         4
SWH       24038.461 Hz
FIDRES     0.366798 Hz
AQ         1.3631988 sec
RG         197.94
DW         20.800 usec
DE         6.50 usec
TE         298.0 K
D1         2.00000000 sec
D11        0.03000000 sec
TD0        1

----- CHANNEL f1 -----
SFO1      100.6228293 MHz
NUC1      13C
P1         9.31 usec
S1         32768
SF         100.6127685 MHz
W3M       EM
SSB        0
LB         1.00 Hz
GB         0
PC         1.40

```

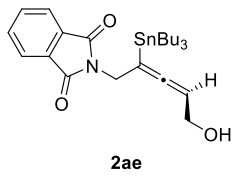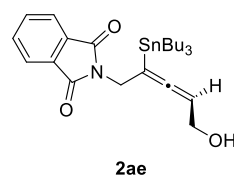

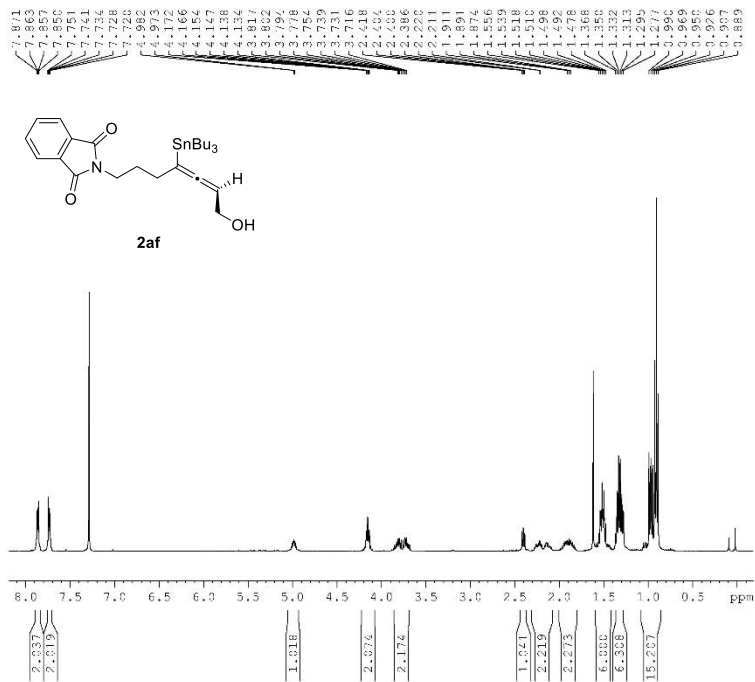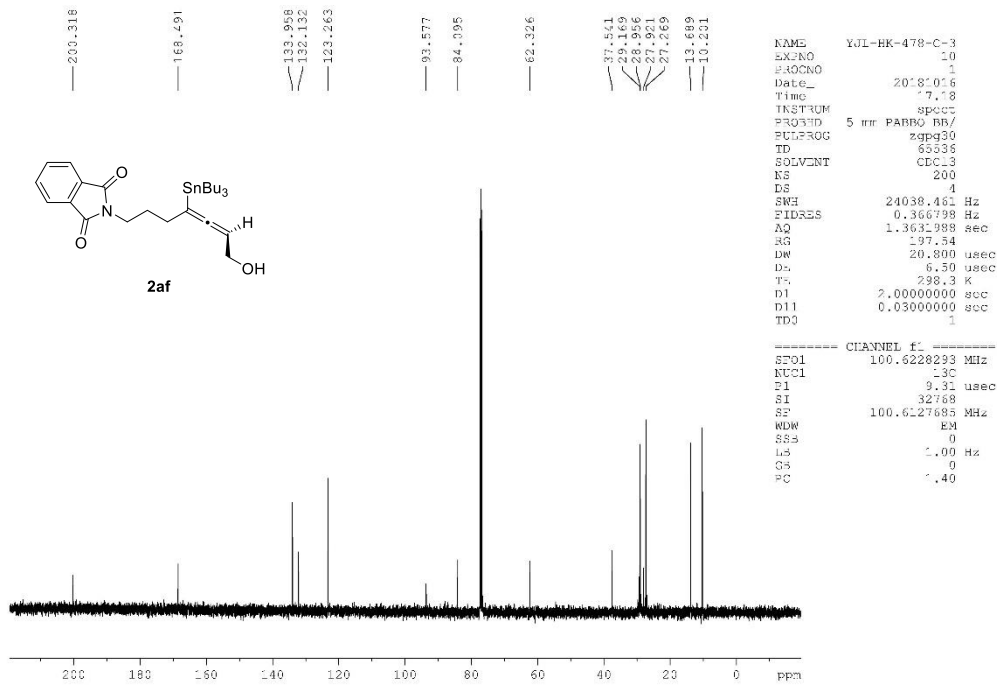

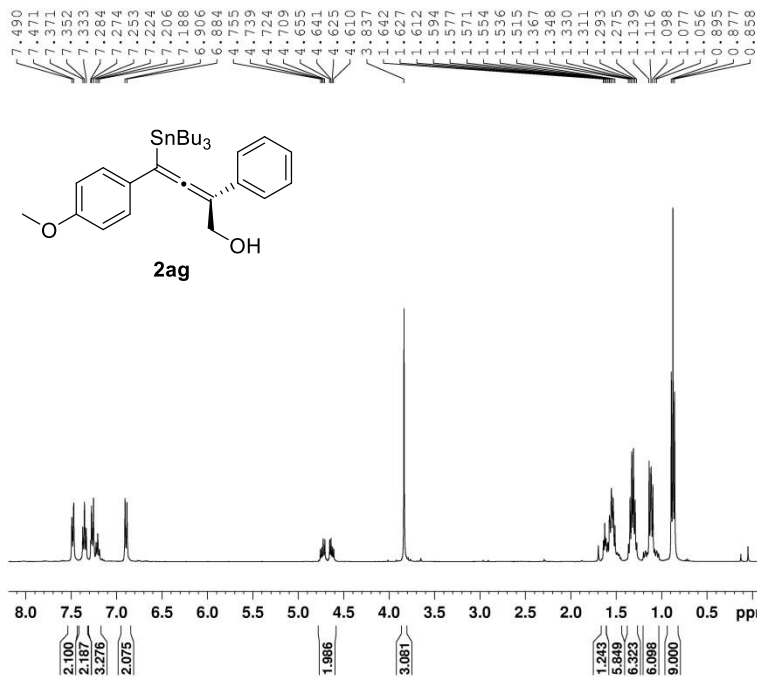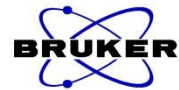

```

NAME      yj1-hk-718-h
EXPNO     10
PROCNO    1
Date_     20191203
Time      21.07
INSTRUM   spect
PROBHD    5 mm PABBO BB/
PULPROG   zg30
TD         65536
SOLVENT   CDCl3
NS         16
DS         2
SWH        8012.820 Hz
FIDRES     0.122266 Hz
AQ         4.0894966 sec
RG         11.08
DW         62.400 usec
DE         6.50 usec
TE         295.1 K
D1         1.0000000 sec
TDO        1

```

```

===== CHANNEL f1 =====
SF01     400.1324710 MHz
NUC1      1H
P1        9.99 usec
SI        65536
SF        400.1300000 MHz
WDW       EM
SSB       0
LB        0.30 Hz
GB         0
PC        1.00

```

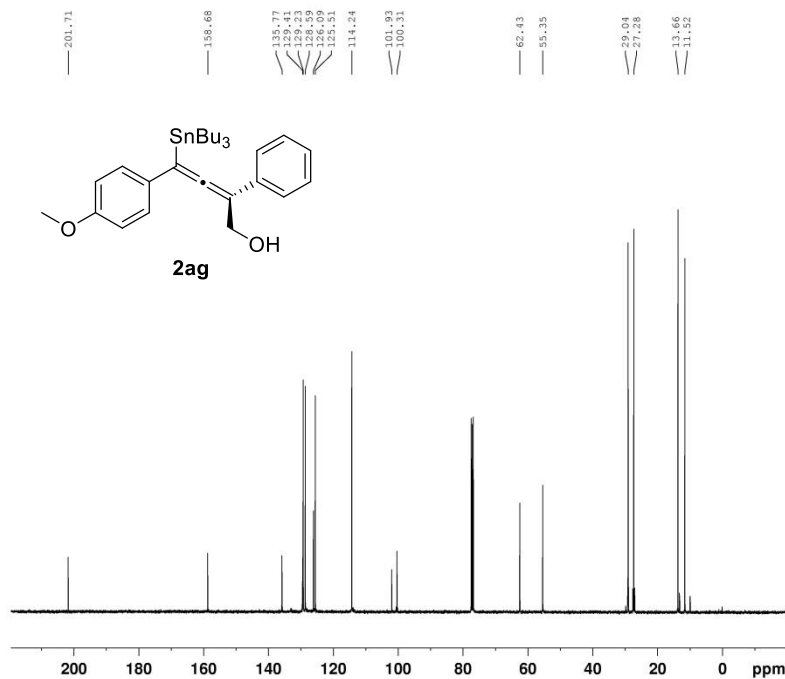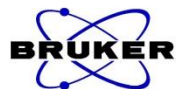

```

NAME      yj1-hk-718-c
EXPNO     11
PROCNO    1
Date_     20191203
Time      21.37
INSTRUM   spect
PROBHD    5 mm PABBO BB/
PULPROG   zgpg30
TD         65536
SOLVENT   CDCl3
NS         512
DS         4
SWH        24038.461 Hz
FIDRES     0.366798 Hz
AQ         1.3631988 sec
RG         197.54
DW         20.800 usec
DE         6.50 usec
TE         295.8 K
D1         2.0000000 sec
D11        0.0300000 sec
TDO        1

```

```

===== CHANNEL f1 =====
SF01     100.6228293 MHz
NUC1     13C
P1        9.31 usec
SI        32768
SF        100.6127685 MHz
WDW       EM
SSB       0
LB        1.00 Hz
GB         0
PC        1.40

```



7.423  
7.405  
7.371  
7.352  
7.331  
7.279  
7.266  
7.218  
7.200  
4.537  
4.523  
4.507  
4.428  
4.414  
4.398  
2.940  
2.918  
2.899  
2.886  
2.667  
2.650  
2.620  
1.820  
1.803  
1.891  
1.874  
1.863  
1.557  
1.542  
1.410  
1.392  
1.374  
1.355  
1.337  
1.319  
1.269  
1.254  
1.238  
1.087  
1.066  
1.047  
0.958  
0.939  
0.921

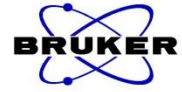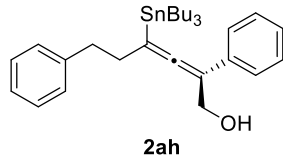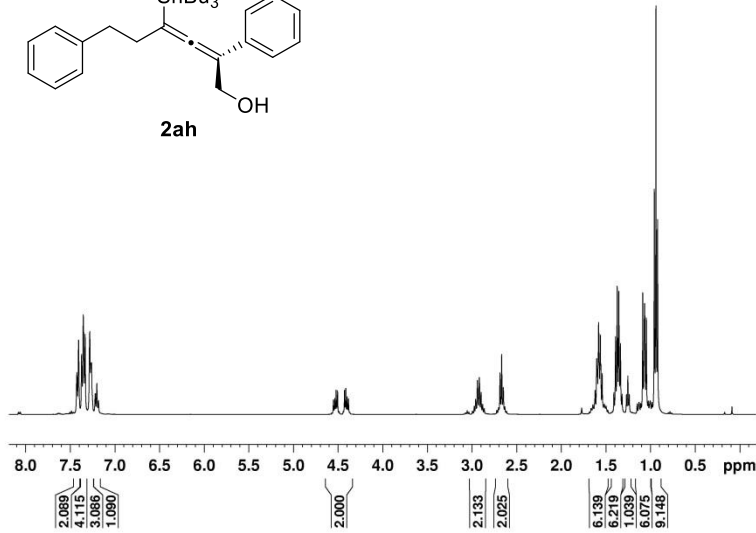

```

NAME      yj1-hk-719-h
EXPNO    10
PROCNO   1
Date_    20191211
Time     20.05
INSTRUM  spect
PROBHD   5 mm PABBO BB/
PULPROG  zg30
TD       65536
SOLVENT  CDCl3
NS       16
DS       2
SWH      8012.820 Hz
FIDRES   0.122266 Hz
AQ       4.0894966 sec
RG       7.74
DW       62.400 usec
DE       6.50 usec
TE       294.8 K
D1       1.0000000 sec
TD0      1

----- CHANNEL f1 -----
SF01    400.1324710 MHz
NUC1     1H
P1       9.99 usec
SI       65536
SF       400.1300000 MHz
WDW      EM
SSB      0
LB       0.30 Hz
GB       0
PC       1.00
  
```

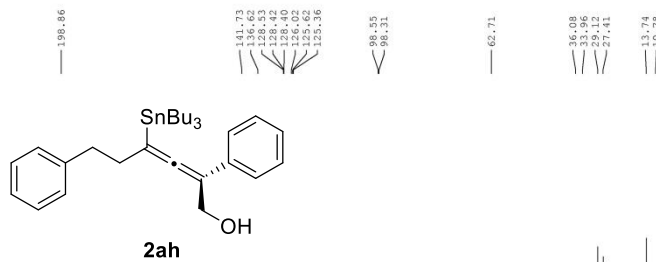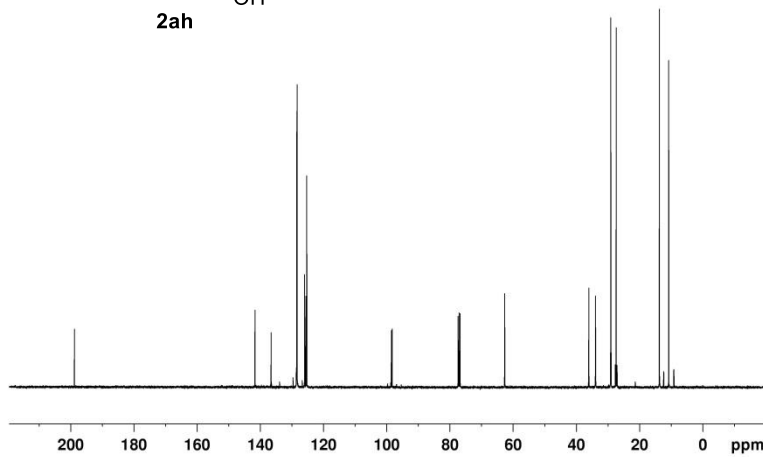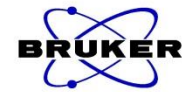

```

NAME      yj1-hk-719-c
EXPNO    11
PROCNO   1
Date_    20191211
Time     20.19
INSTRUM  spect
PROBHD   5 mm PABBO BB/
PULPROG  zgpg30
TD       65536
SOLVENT  CDCl3
NS       218
DS       4
SWH      24038.461 Hz
FIDRES   0.366798 Hz
AQ       1.3631988 sec
RG       197.54
DW       20.800 usec
DE       6.50 usec
TE       295.5 K
D1       2.0000000 sec
D11      0.0300000 sec
TD0      1

----- CHANNEL f1 -----
SF01    100.6228293 MHz
NUC1     13C
P1       9.31 usec
SI       32768
SF       100.6127685 MHz
WDW      EM
SSB      0
LB       1.00 Hz
GB       0
PC       1.40
  
```

7.327  
7.308  
7.292  
7.270  
7.244  
7.234  
7.214  
6.885  
6.863  
4.449  
4.434  
4.361  
4.347  
4.331  
3.830  
2.900  
2.880  
2.851  
2.842  
2.624  
2.605  
2.587  
2.569  
1.552  
1.530  
1.511  
1.505  
1.491  
1.363  
1.345  
1.327  
1.308  
1.290  
1.272  
1.178  
1.163  
1.148  
1.028  
1.007  
0.988  
0.967  
0.951  
0.934  
0.913  
0.895  
0.877

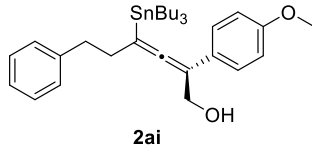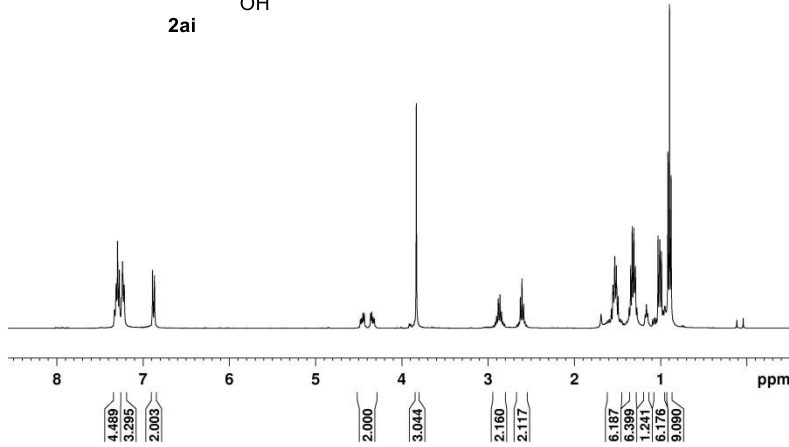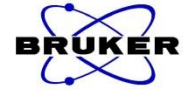

```

NAME      yj1-hk-770-h
EXPNO     10
PROCNO    1
Date_     20200824
Time      14.44
INSTRUM   spect
PROBHD    5 mm PABBO BB/
PULPROG   zg30
TD         65536
SOLVENT   CDCl3
NS         4
DS         0
SWH        8012.820 Hz
FIDRES     0.122266 Hz
AQ         4.0894966 sec
RG         19.91
DW         62.400 usec
DE         6.50 usec
TE         0.0 K
D1         1.0000000 sec
TDO        1

===== CHANNEL f1 =====
SF01      400.1324710 MHz
NUC1       1H
P1         9.99 usec
SI         65536
SF         400.1300000 MHz
WDW        EM
SSB        0
LB         0.30 Hz
GB         0
PC         1.00
  
```

198.91  
157.81  
141.76  
128.75  
128.48  
128.35  
125.94  
113.95  
98.45  
98.17  
62.87  
55.33  
36.03  
34.13  
29.08  
27.36  
13.69  
10.69

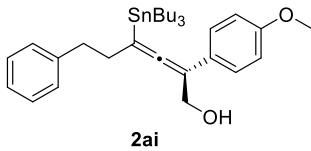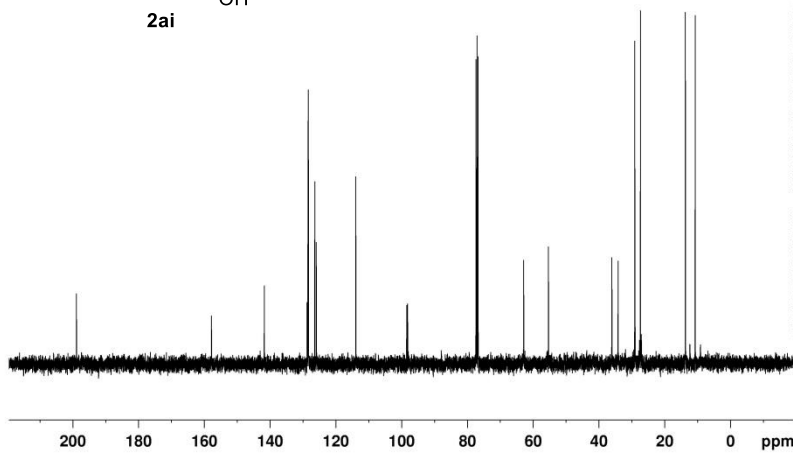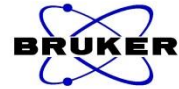

```

NAME      yj1-hk-770-c
EXPNO     11
PROCNO    1
Date_     20200824
Time      14.47
INSTRUM   spect
PROBHD    5 mm PABBO BB/
PULPROG   zgpg30
TD         65536
SOLVENT   CDCl3
NS         43
DS         4
SWH        24038.461 Hz
FIDRES     0.366798 Hz
AQ         1.3631988 sec
RG         197.54
DW         20.800 usec
DE         6.50 usec
TE         0.0 K
D1         2.0000000 sec
D11        0.0300000 sec
TDO        1

===== CHANNEL f1 =====
SF01      100.6228293 MHz
NUC1       13C
P1         9.31 usec
SI         32768
SF         100.6127685 MHz
WDW        EM
SSB        0
LB         1.00 Hz
GB         0
PC         1.40
  
```

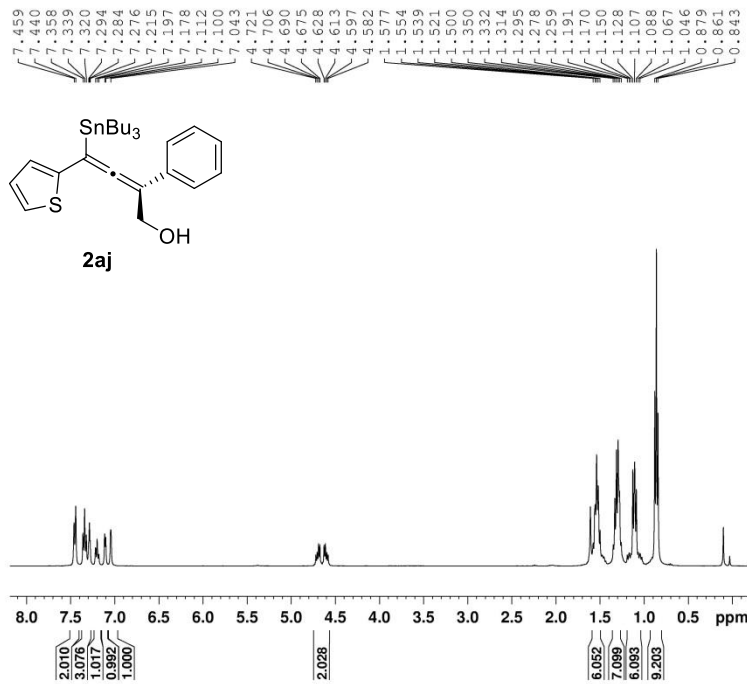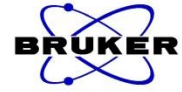

```

NAME yj1-hk-722-race-h
EXPNO 10
PROCNO 1
Date_ 20200825
Time 19.07
INSTRUM spect
PROBHD 5 mm PABBO BB/
PULPROG zg30
TD 65536
SOLVENT CDCl3
NS 16
DS 2
SWH 8012.820 Hz
FIDRES 0.122266 Hz
AQ 4.0894966 sec
RG 30.81
DW 62.400 usec
DE 6.50 usec
TE 0.0 K
D1 1.0000000 sec
TD0 1

===== CHANNEL f1 =====
SF01 400.1324710 MHz
NUC1 1H
P1 9.99 usec
SI 65536
SF 400.1300000 MHz
WDW EM
SSB 0
LB 0.30 Hz
GB 0
PC 1.00

```

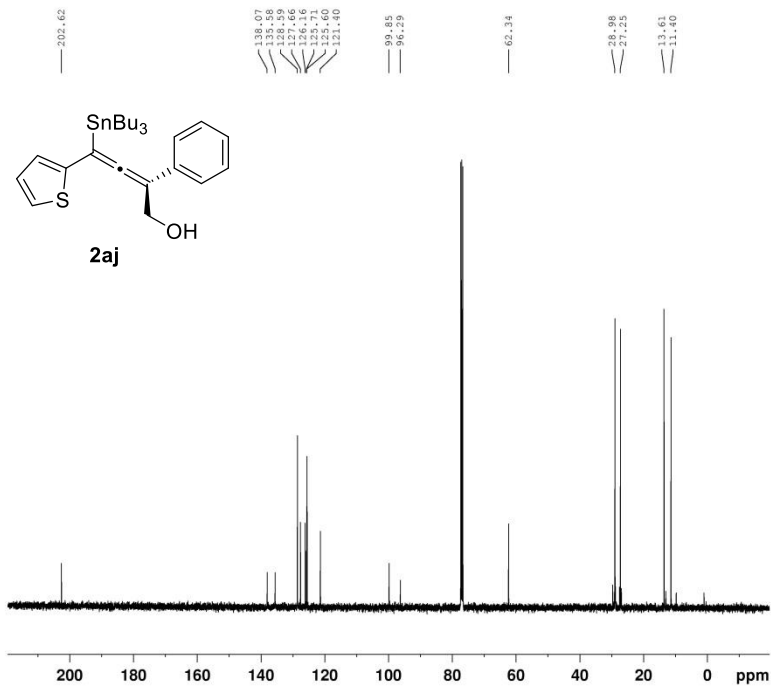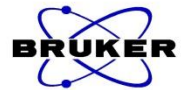

```

NAME yj1-hk-722-race-c
EXPNO 11
PROCNO 1
Date_ 20200825
Time 19.37
INSTRUM spect
PROBHD 5 mm PABBO BB/
PULPROG zgpg30
TD 65536
SOLVENT CDCl3
NS 512
DS 4
SWH 24038.461 Hz
FIDRES 0.366798 Hz
AQ 1.3631988 sec
RG 197.54
DW 20.800 usec
DE 6.50 usec
TE 0.0 K
D1 2.0000000 sec
D11 0.0300000 sec
TD0 1

===== CHANNEL f1 =====
SF01 100.6228293 MHz
NUC1 13C
P1 9.31 usec
SI 32768
SF 100.6127685 MHz
WDW EM
SSB 0
LB 1.00 Hz
GB 0
PC 1.40

```

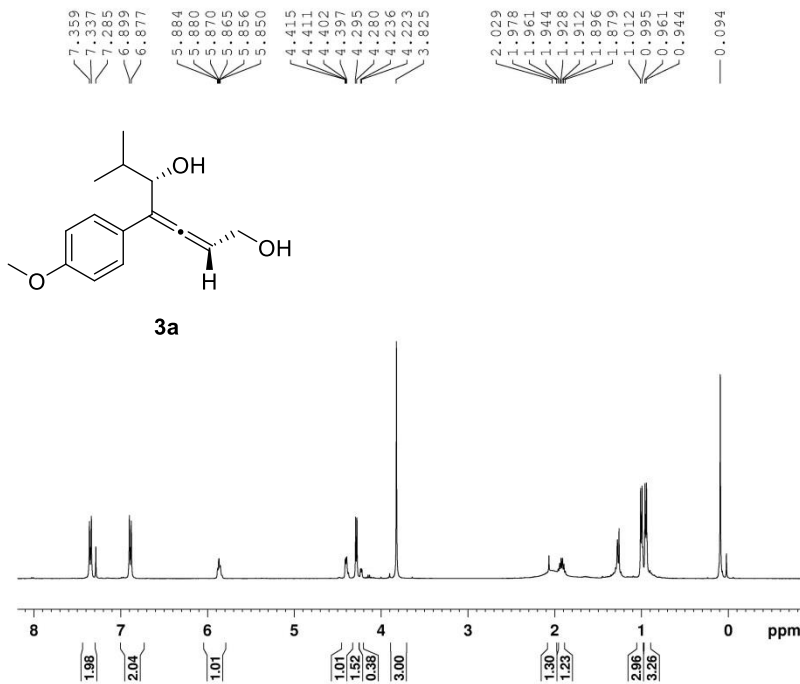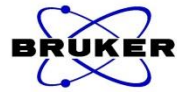

```

NAME      wm-15-80-3
EXPNO     10
PROCNO    1
Date_     20201110
Time      14.45
INSTRUM   spect
PROBHD    5 mm PABBO BB/
PULPROG   zg30
TD         65536
SOLVENT   CDCl3
NS         4
DS         2
SWH       8012.820 Hz
FIDRES    0.122266 Hz
AQ         4.0894966 sec
RG         63.21
DW         62.400 usec
DE         6.50 usec
TE         0.0 K
D1         1.00000000 sec
TDO        1

===== CHANNEL f1 =====
SF01      400.1324710 MHz
NUC1       1H
P1         9.99 usec
SI         65536
SF         400.1300000 MHz
WDW        EM
SSB         0
LB         0.30 Hz
GB         0
PC         1.00

```

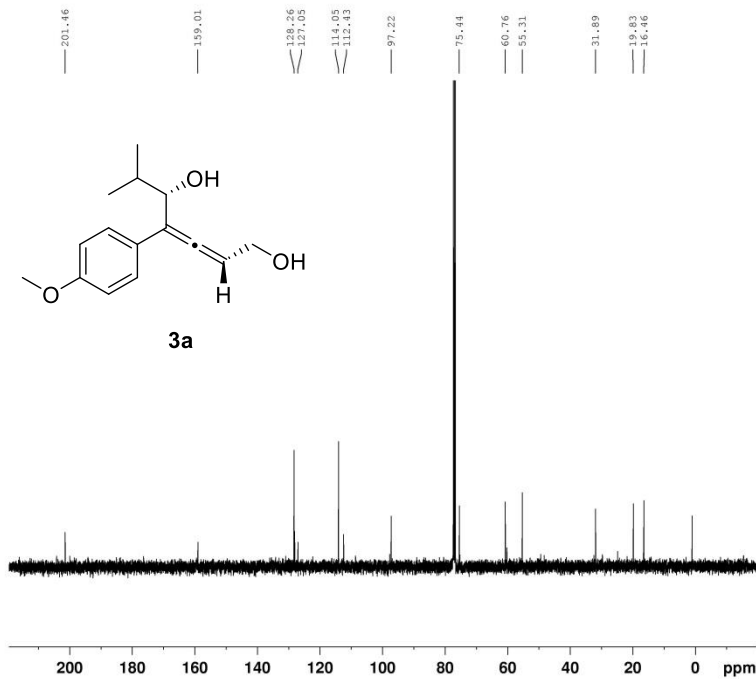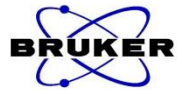

```

NAME      wm-15-80-3
EXPNO     11
PROCNO    1
Date_     20201110
Time      14.51
INSTRUM   spect
PROBHD    5 mm PABBO BB/
PULPROG   zgpg30
TD         65536
SOLVENT   CDCl3
NS         140
DS         4
SWH       24038.461 Hz
FIDRES    0.366798 Hz
AQ         1.3631988 sec
RG         197.54
DW         20.800 usec
DE         6.50 usec
TE         0.0 K
D1         2.00000000 sec
D11        0.03000000 sec
TDO        1

===== CHANNEL f1 =====
SF01      100.6228293 MHz
NUC1       13C
P1         9.31 usec
SI         32768
SF         100.6127685 MHz
WDW        EM
SSB         0
LB         1.00 Hz
GB         0
PC         1.40

```

7.284  
7.186  
7.165  
6.877  
6.855  
6.190  
5.172  
5.153  
5.133  
4.666  
4.654  
4.636  
4.623  
3.818  
2.089  
1.636  
1.616  
1.589  
1.572  
1.551  
1.544  
1.532  
1.526  
1.512  
1.487  
1.468  
1.448  
1.390  
1.370  
1.372  
1.353  
1.355  
1.317  
1.299  
1.177  
1.155  
1.136  
1.113  
1.092  
1.072  
1.051  
1.029  
1.010  
0.926  
0.907  
0.889

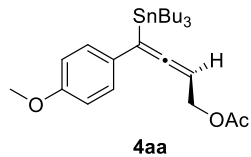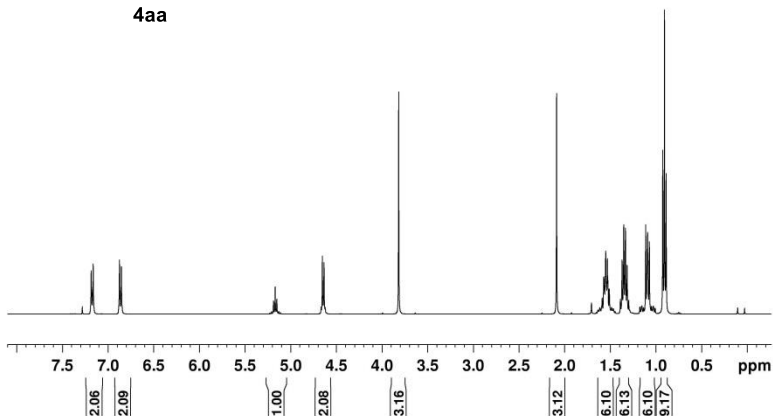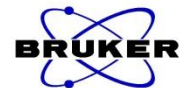

```

NAME      yj1-hk-807-2-h
EXPNO    10
PROCNO   1
Date_    20200917
Time     23.52
INSTRUM  spect
PROBHD   5 mm PABBO BB/
PULPROG  zg30
TD        65536
SOLVENT  CDCl3
NS        4
DS        2
SWH       8012.820 Hz
FIDRES   0.122266 Hz
AQ        4.0894966 sec
RG        11.08
DW        62.400 usec
DE        6.50 usec
TE        297.4 K
D1        1.00000000 sec
TD0       1

===== CHANNEL f1 =====
SF01     400.1324710 MHz
NUC1     1H
P1       9.99 usec
SI       65536
SF       400.1300000 MHz
WDW      EM
SSB      0
LB       0.30 Hz
GB       0
PC       1.00
  
```

203.51  
170.95  
158.40  
129.72  
129.00  
128.91  
114.07  
97.57  
80.01  
63.76  
55.28  
26.82  
27.21  
21.07  
13.66  
11.09

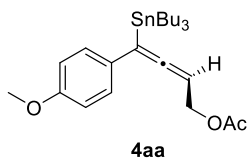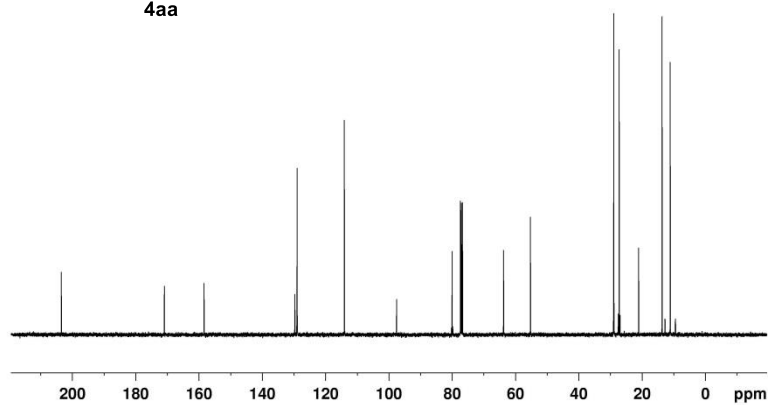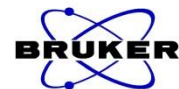

```

NAME      yj1-hk-807-2-h
EXPNO    11
PROCNO   1
Date_    20200918
Time     0.00
INSTRUM  spect
PROBHD   5 mm PABBO BB/
PULPROG  zgpg30
TD        65536
SOLVENT  CDCl3
NS        128
DS        4
SWH       24038.461 Hz
FIDRES   0.366798 Hz
AQ        1.3631988 sec
RG        197.54
DW        20.800 usec
DE        6.50 usec
TE        297.9 K
D1        2.00000000 sec
D11      0.03000000 sec
TD0       1

===== CHANNEL f1 =====
SF01     100.6228293 MHz
NUC1     13C
P1       9.31 usec
SI       32768
SF       100.6127685 MHz
WDW      EM
SSB      0
LB       1.00 Hz
GB       0
PC       1.40
  
```

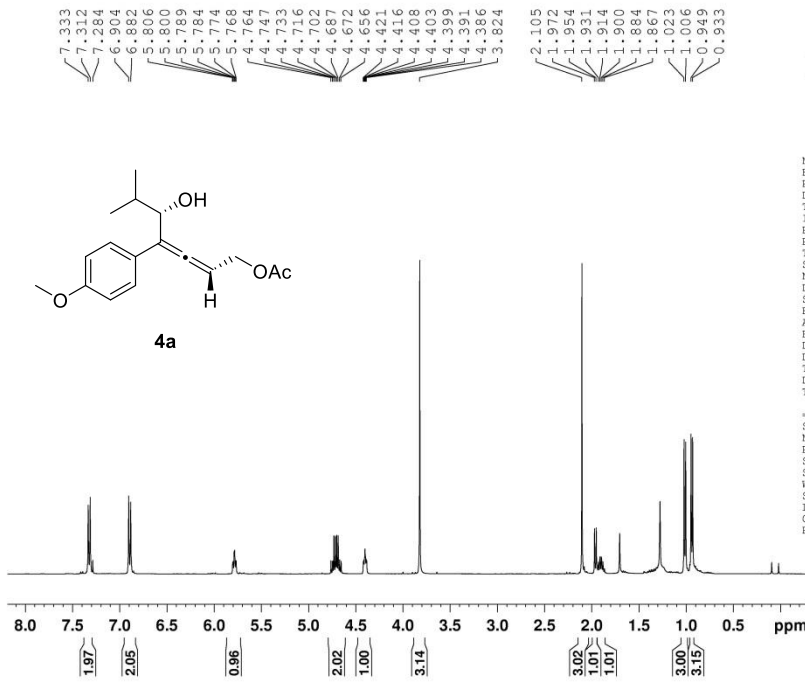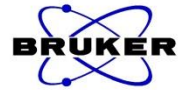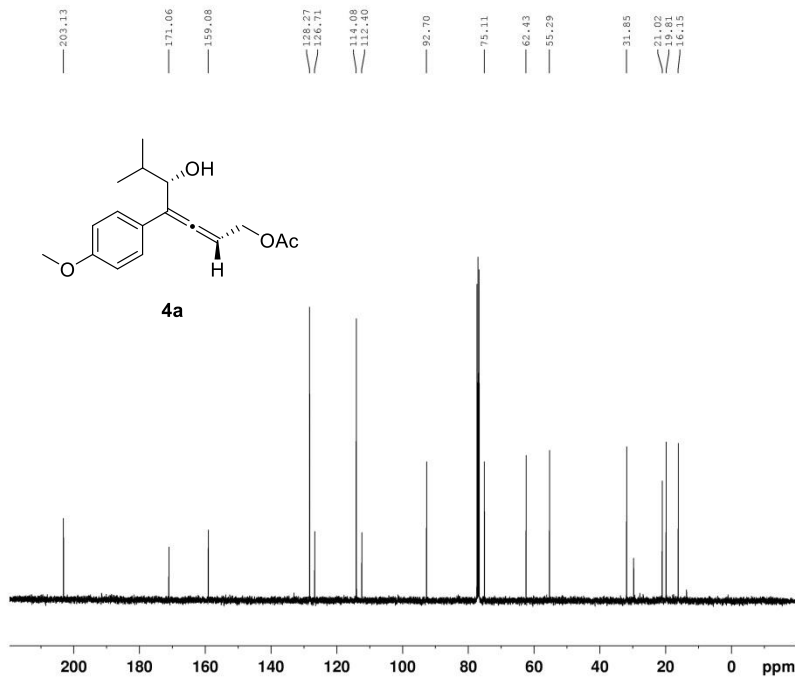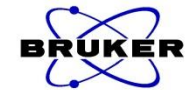

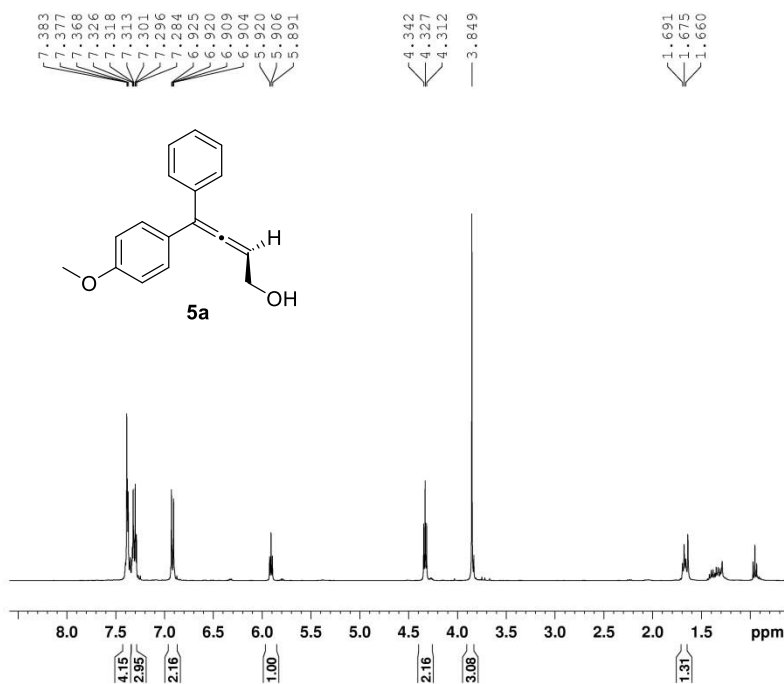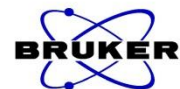

```

NAME      yj1-hk-556-h
EXPNO     10
PROCNO    1
Date_     20181220
Time      17.01
INSTRUM   spect
PROBHD    5 mm PABBO BB/
PULPROG   zg30
TD         65536
SOLVENT   CDCl3
NS         4
DS         0
SWH       8012.820 Hz
FIDRES    0.122266 Hz
AQ         4.0894966 sec
RG         63.21
DW         62.400 usec
DE         6.50 usec
TE         294.7 K
D1         1.00000000 sec
TD0        1

===== CHANNEL f1 =====
SF01      400.1324710 MHz
NUC1       1H
P1         9.39 usec
SI         65536
SF         400.1300000 MHz
WDW        EM
SSB        0
LB         0.30 Hz
GB         0
PC         1.00
  
```

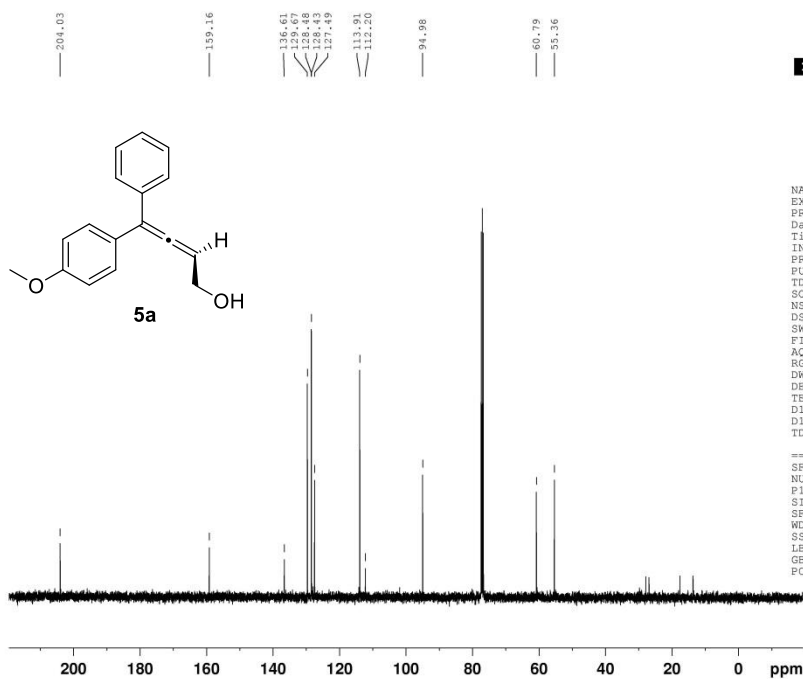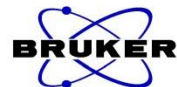

```

NAME      yj1-hk-556-c
EXPNO     11
PROCNO    1
Date_     20181220
Time      17.04
INSTRUM   spect
PROBHD    5 mm PABBO BB/
PULPROG   zgpg30
TD         65536
SOLVENT   CDCl3
NS         4
DS         4
SWH       24038.461 Hz
FIDRES    0.365798 Hz
AQ         1.3631988 sec
RG         197.54
DW         20.800 usec
DE         6.50 usec
TE         295.1 K
D1         2.00000000 sec
D11        0.03000000 sec
TD0        1

===== CHANNEL f1 =====
SF01      100.6228293 MHz
NUC1       13C
P1         9.31 usec
SI         32768
SF         100.6127685 MHz
WDW        EM
SSB        0
LB         1.00 Hz
GB         0
PC         1.40
  
```

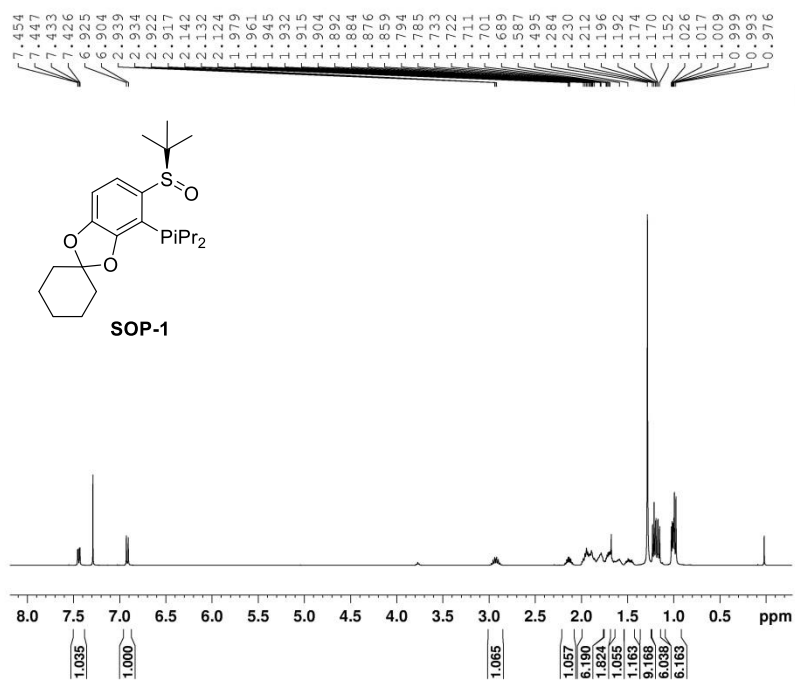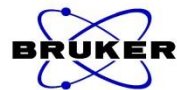

```

NAME      yj1-hk-108-1-h
EXPNO     10
PROCNO    1
Date_     20171129
Time      17.50
INSTRUM   spect
PROBHD    5 mm PABBO BB/
PULPROG   zg30
TD         65536
SOLVENT   CDCl3
NS         4
DS         0
SWH        8012.820 Hz
FIDRES    0.122266 Hz
AQ         4.0894966 sec
RG         71.18
DW         62.400 usec
DE         6.50 usec
TE         0.0 K
D1         1.00000000 sec
TD0        1

===== CHANNEL f1 =====
SF01      400.1324710 MHz
NUC1       1H
P1         9.99 usec
SI         65536
SF         400.1300000 MHz
WDW        EM
SSB        0
LB         0.30 Hz
GB         0
PC         1.00
  
```

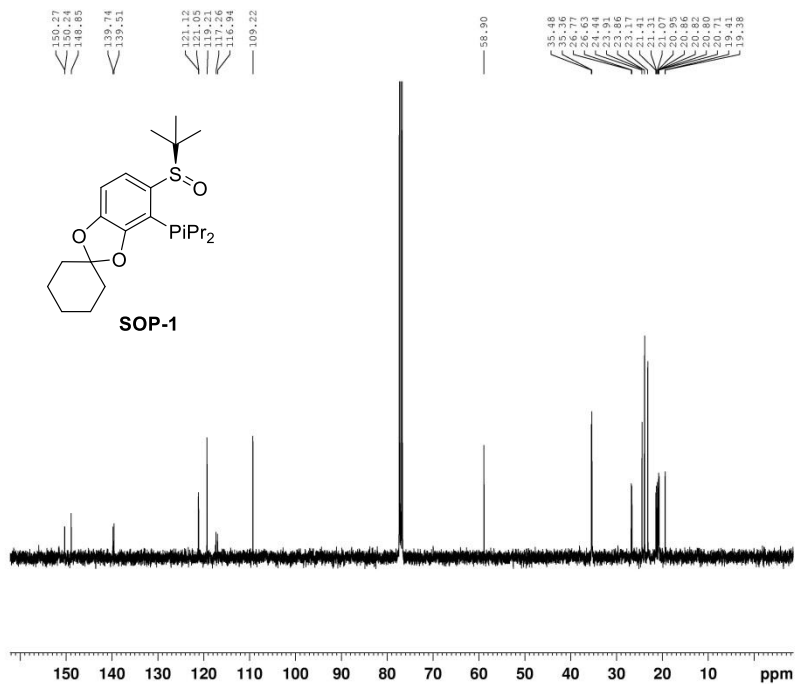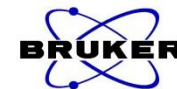

```

NAME      yj1-hk-108-c
EXPNO     10
PROCNO    1
Date_     20200903
Time      19.49
INSTRUM   spect
PROBHD    5 mm PABBO BB/
PULPROG   zgpg30
TD         65536
SOLVENT   CDCl3
NS         350
DS         0
SWH        24038.461 Hz
FIDRES    0.365798 Hz
AQ         1.3631988 sec
RG         197.54
DW         20.800 usec
DE         6.50 usec
TE         298.0 K
D1         2.00000000 sec
D11        0.03000000 sec
TD0        1

===== CHANNEL f1 =====
SF01      100.6228293 MHz
NUC1       13C
P1         9.31 usec
SI         32768
SF         100.6127685 MHz
WDW        EM
SSB        0
LB         1.00 Hz
GB         0
PC         1.40
  
```



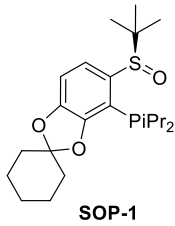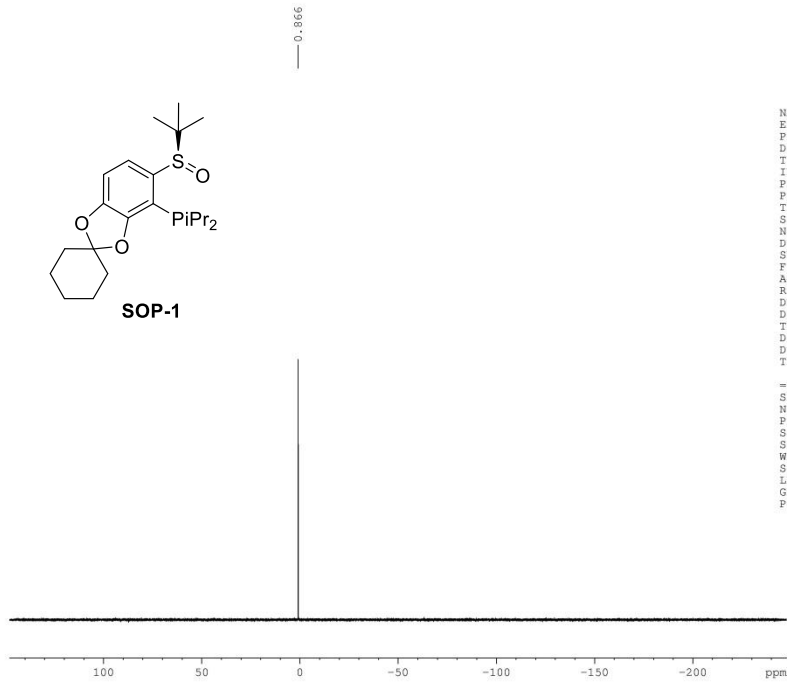

```

NAME      yjl-hk-108-1-p
EXPNO     11
PROCNO    1
Date_     20171129
Time      17.51
INSTRUM   spect
PROBHD    5 mm PABBO BB/
PULPROG   zgpg30
TD         65536
SOLVENT   CDCl3
NS         8
DS         4
SWH        64102.563 Hz
FIDRES     0.978127 Hz
AQ         0.5112308 sec
RG         197.54
DW         7.800 usec
DE         6.50 usec
TE         0.0 K
D1         2.0000000 sec
D11        0.0300000 sec
TD0        1
  
```

```

===== CHANNEL f1 =====
SFO1      161.9674942 MHz
NUC1       31P
P1         8.00 usec
SI         32768
SF         161.9755930 MHz
WDW        EM
SSB         0
LB         1.00 Hz
GB         0
PC         1.40
  
```

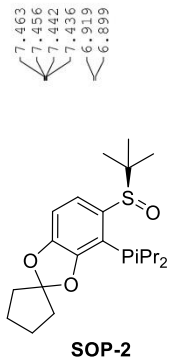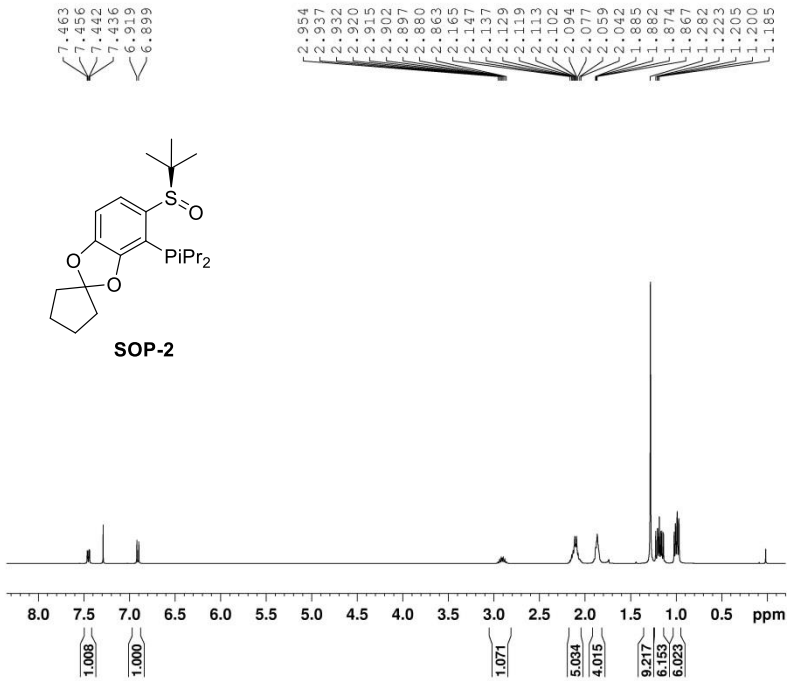

```

NAME      yjl-hk-101-h
EXPNO     10
PROCNO    1
Date_     20171121
Time      21.02
INSTRUM   spect
PROBHD    5 mm PABBO BB/
PULPROG   zg30
TD         65536
SOLVENT   CDCl3
NS         4
DS         0
SWH        8012.820 Hz
FIDRES     0.122266 Hz
AQ         4.0894966 sec
RG         53.87
DW         62.400 usec
DE         6.50 usec
TE         0.0 K
D1         1.0000000 sec
TD0        1
  
```

```

===== CHANNEL f1 =====
SFO1      400.1324710 MHz
NUC1       1H
P1         9.99 usec
SI         65536
SF         400.1300000 MHz
WDW        EM
SSB         0
LB         0.30 Hz
GB         0
PC         1.00
  
```

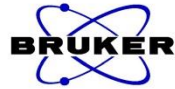

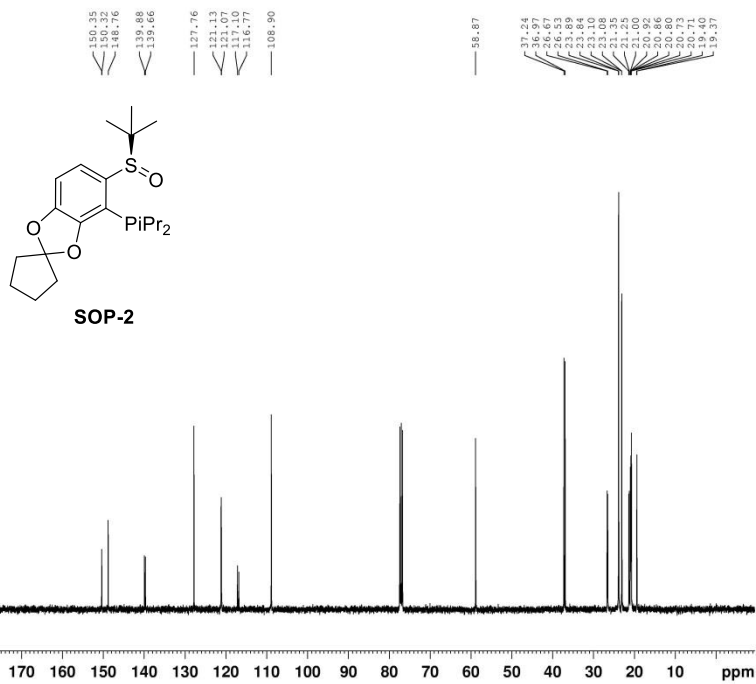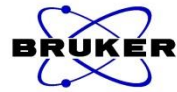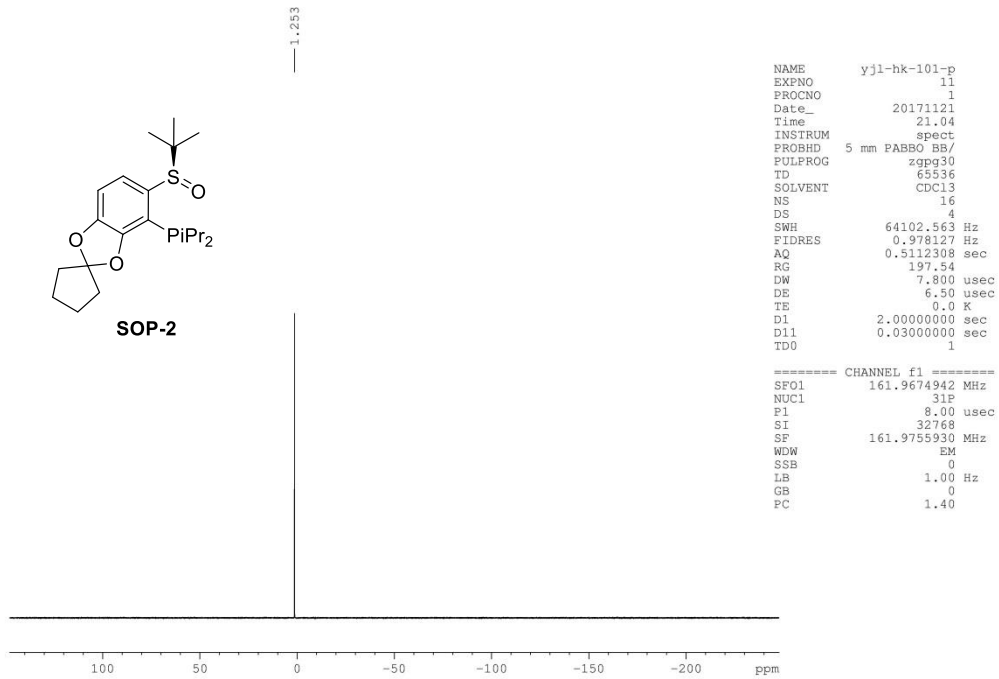



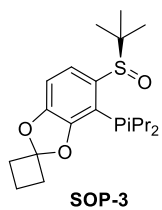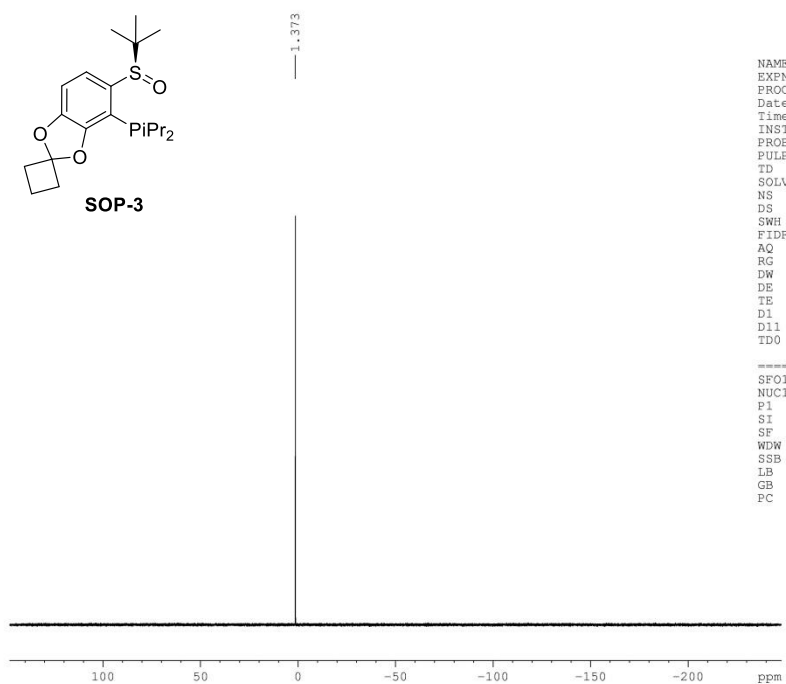

```

NAME      yj1-hk-102-p
EXPNO     10
PROCNO    1
Date_     20200921
Time      13.57
INSTRUM   spect
PROBHD    5 mm PABBO BB/
PULPROG   zgpg30
TD         65536
SOLVENT   CDCl3
NS         16
DS         4
SWH        64102.563 Hz
FIDRES     0.978127 Hz
AQ         0.5112308 sec
RG         197.54
DW         7.800 usec
DE         6.50 usec
TE         297.4 K
D1         2.0000000 sec
D11        0.0300000 sec
TDO        1
  
```

```

===== CHANNEL f1 =====
SFO1      161.9674942 MHz
NUC1       31P
P1         8.00 usec
SI         32768
SF         161.9755930 MHz
WDW        EM
SSB        0
LB         1.00 Hz
GB         0
PC         1.40
  
```

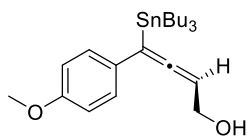

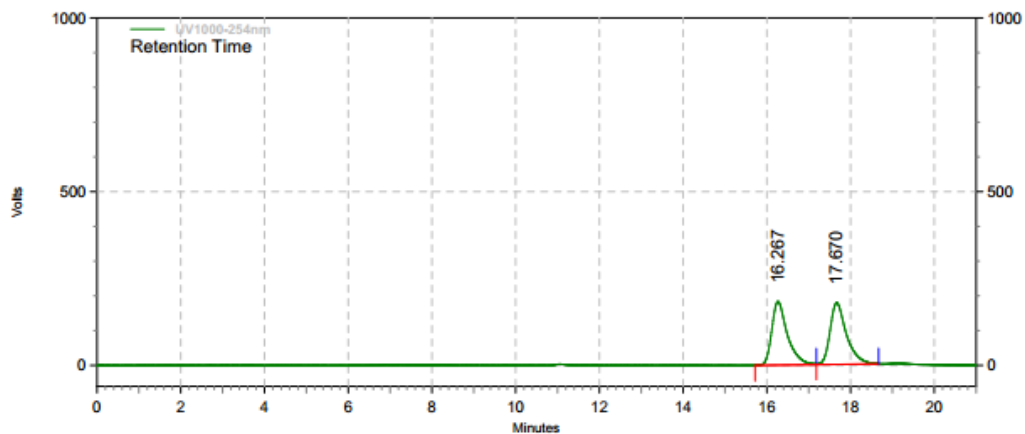

**UV1000-254nm**

**Results**

| Retention Time | Area    | Area % | Height | Height % |
|----------------|---------|--------|--------|----------|
| 16.267         | 4749735 | 49.56  | 183140 | 50.80    |
| 17.670         | 4834268 | 50.44  | 177339 | 49.20    |

|        |         |        |        |        |
|--------|---------|--------|--------|--------|
| Totals | 9584003 | 100.00 | 360479 | 100.00 |
|--------|---------|--------|--------|--------|

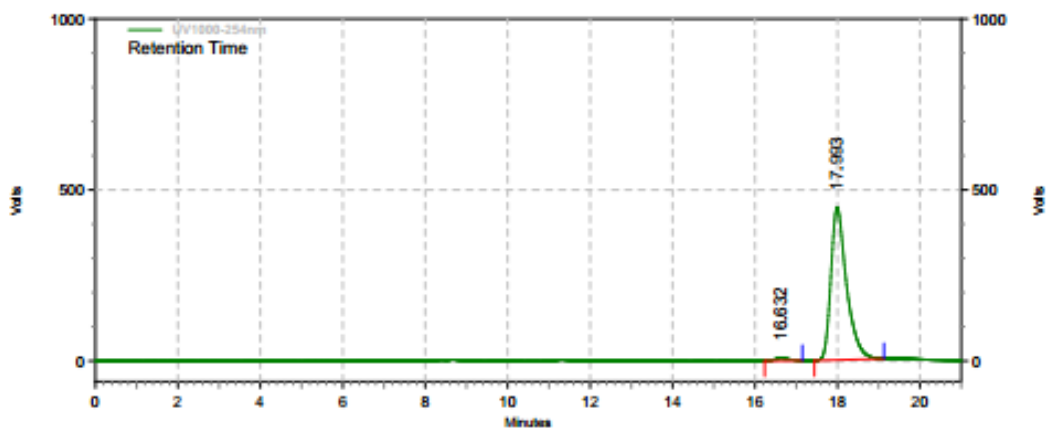

**UV1000-254nm**

**Results**

| Retention Time | Area     | Area % | Height | Height % |
|----------------|----------|--------|--------|----------|
| 16.632         | 186956   | 1.56   | 8303   | 1.83     |
| 17.993         | 11800744 | 98.44  | 446442 | 98.17    |

|        |          |        |        |        |
|--------|----------|--------|--------|--------|
| Totals | 11987700 | 100.00 | 454745 | 100.00 |
|--------|----------|--------|--------|--------|

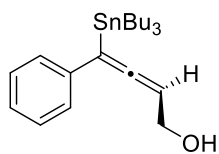

**2b**

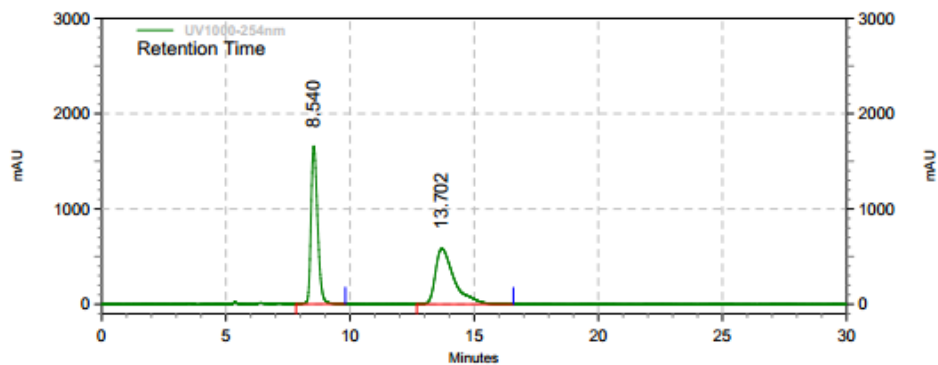

### UV1000-254nm

#### Results

| Retention Time | Area     | Area % | Height  | Height % |
|----------------|----------|--------|---------|----------|
| 8.540          | 30502178 | 50.03  | 1657782 | 73.98    |
| 13.702         | 30469555 | 49.97  | 583023  | 26.02    |

|        |          |        |         |        |
|--------|----------|--------|---------|--------|
| Totals | 60971733 | 100.00 | 2240805 | 100.00 |
|--------|----------|--------|---------|--------|

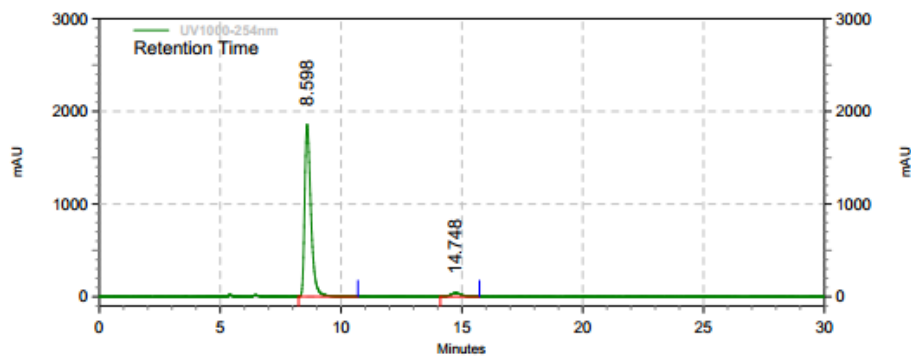

### UV1000-254nm

#### Results

| Retention Time | Area     | Area % | Height  | Height % |
|----------------|----------|--------|---------|----------|
| 8.598          | 33442047 | 96.51  | 1855238 | 97.94    |
| 14.748         | 1210809  | 3.49   | 39039   | 2.06     |

|        |          |        |         |        |
|--------|----------|--------|---------|--------|
| Totals | 34652856 | 100.00 | 1894277 | 100.00 |
|--------|----------|--------|---------|--------|

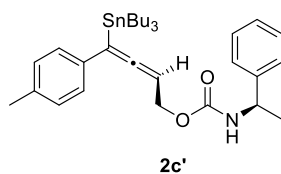

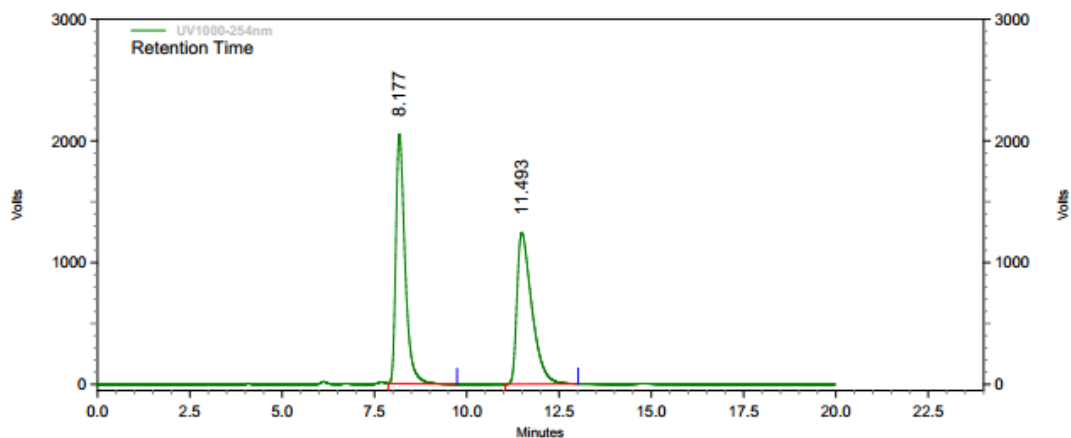

### UV1000-254nm

#### Results

| Retention Time | Area     | Area % | Height  | Height % |
|----------------|----------|--------|---------|----------|
| 8.177          | 35380102 | 50.35  | 2049160 | 62.20    |
| 11.493         | 34890882 | 49.65  | 1245407 | 37.80    |

| Totals | Area     | Area % | Height  | Height % |
|--------|----------|--------|---------|----------|
|        | 70270984 | 100.00 | 3294567 | 100.00   |

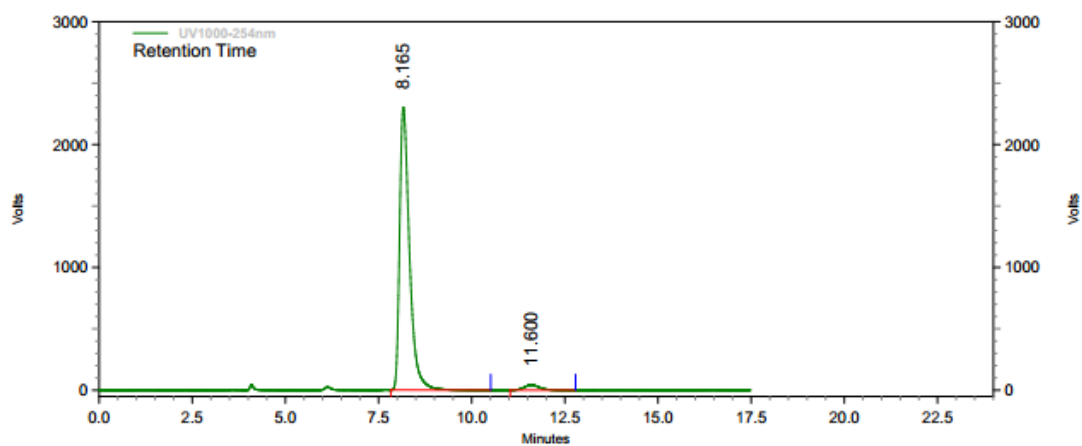

### UV1000-254nm

#### Results

| Retention Time | Area     | Area % | Height  | Height % |
|----------------|----------|--------|---------|----------|
| 8.165          | 42367376 | 97.20  | 2301824 | 98.18    |
| 11.600         | 1219681  | 2.80   | 42554   | 1.82     |

| Totals | Area     | Area % | Height  | Height % |
|--------|----------|--------|---------|----------|
|        | 43587057 | 100.00 | 2344378 | 100.00   |

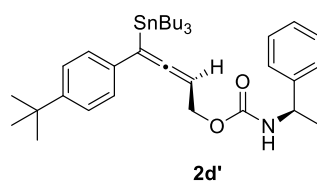

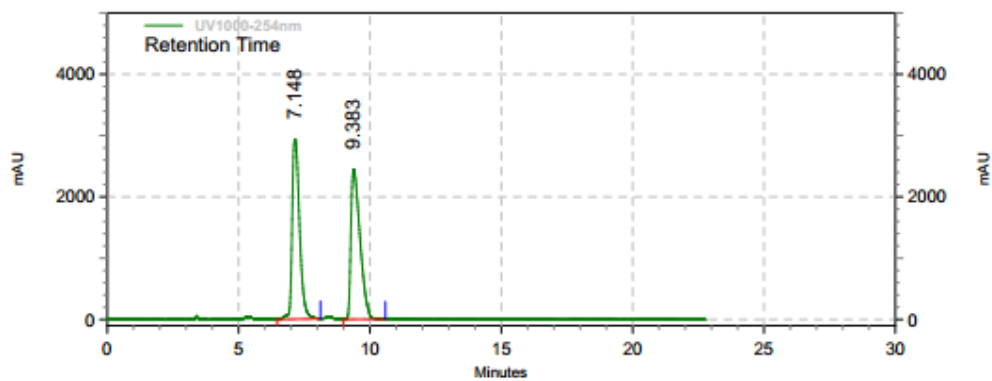

### UV1000-254nm

#### Results

| Retention Time | Area     | Area % | Height  | Height % |
|----------------|----------|--------|---------|----------|
| 7.148          | 57386033 | 49.32  | 2934618 | 54.51    |
| 9.383          | 58974185 | 50.68  | 2448658 | 45.49    |

|        |           |        |         |        |
|--------|-----------|--------|---------|--------|
| Totals | 116360218 | 100.00 | 5383276 | 100.00 |
|--------|-----------|--------|---------|--------|

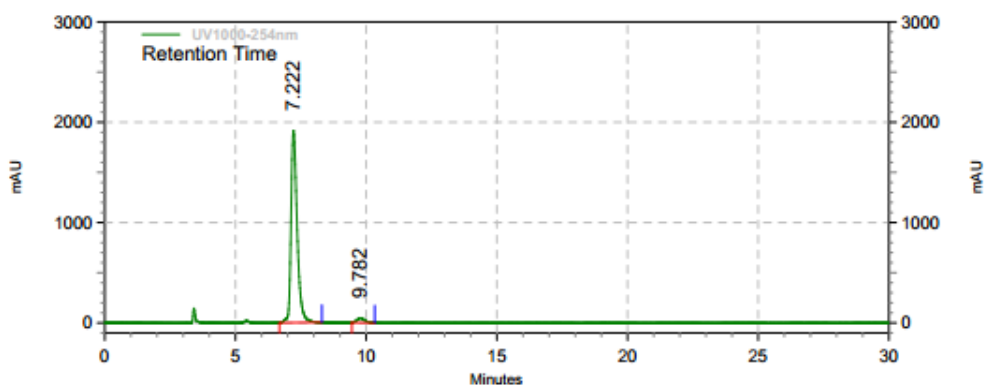

### UV1000-254nm

#### Results

| Retention Time | Area     | Area % | Height  | Height % |
|----------------|----------|--------|---------|----------|
| 7.222          | 31425552 | 97.01  | 1914879 | 97.70    |
| 9.782          | 967739   | 2.99   | 45029   | 2.30     |

|        |          |        |         |        |
|--------|----------|--------|---------|--------|
| Totals | 32393291 | 100.00 | 1959908 | 100.00 |
|--------|----------|--------|---------|--------|

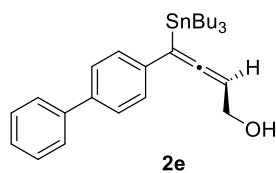



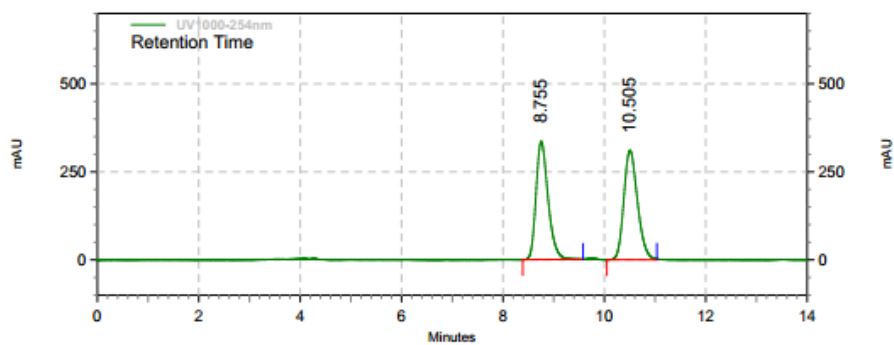

**UV1000-254nm  
Results**

| Retention Time | Area    | Area % | Height | Height % |
|----------------|---------|--------|--------|----------|
| 8.755          | 5536904 | 48.74  | 335051 | 51.90    |
| 10.505         | 5823060 | 51.26  | 310545 | 48.10    |

| Totals | Area     | Area % | Height | Height % |
|--------|----------|--------|--------|----------|
|        | 11359964 | 100.00 | 645596 | 100.00   |

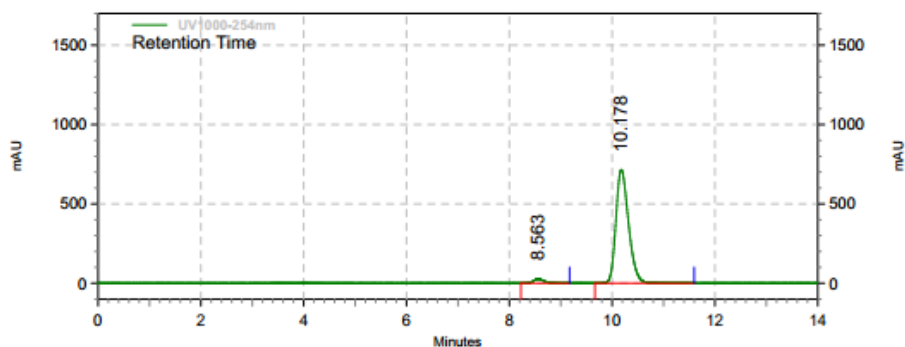

**UV1000-254nm  
Results**

| Retention Time | Area     | Area % | Height | Height % |
|----------------|----------|--------|--------|----------|
| 8.563          | 381094   | 3.03   | 26666  | 3.60     |
| 10.178         | 12213851 | 96.97  | 714944 | 96.40    |

| Totals | Area     | Area % | Height | Height % |
|--------|----------|--------|--------|----------|
|        | 12594945 | 100.00 | 741610 | 100.00   |

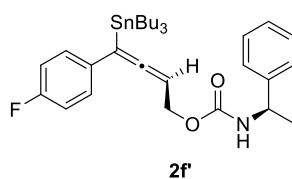

**2f**

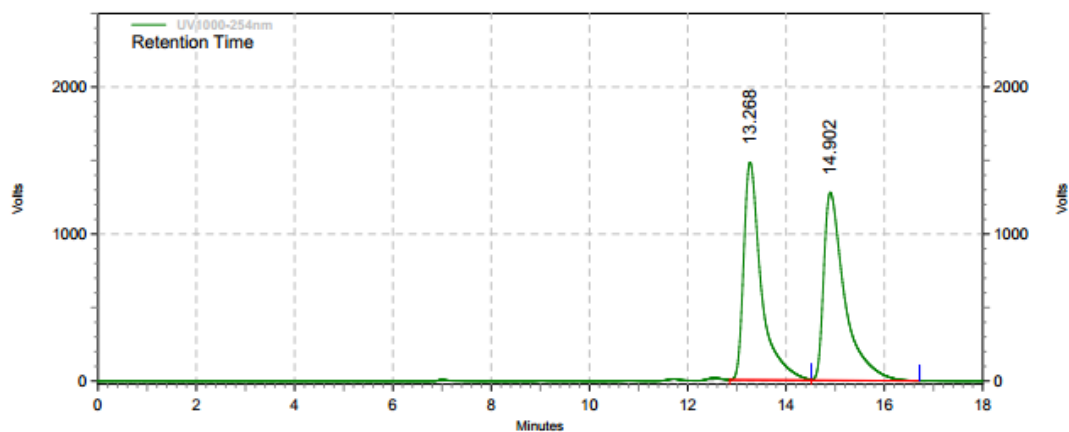

**UV1000-254nm**

**Results**

| Retention Time | Area     | Area % | Height  | Height % |
|----------------|----------|--------|---------|----------|
| 13.268         | 36821922 | 49.31  | 1480527 | 53.67    |
| 14.902         | 37856385 | 50.69  | 1277883 | 46.33    |

|        |          |        |         |        |
|--------|----------|--------|---------|--------|
| Totals | 74678307 | 100.00 | 2758410 | 100.00 |
|--------|----------|--------|---------|--------|

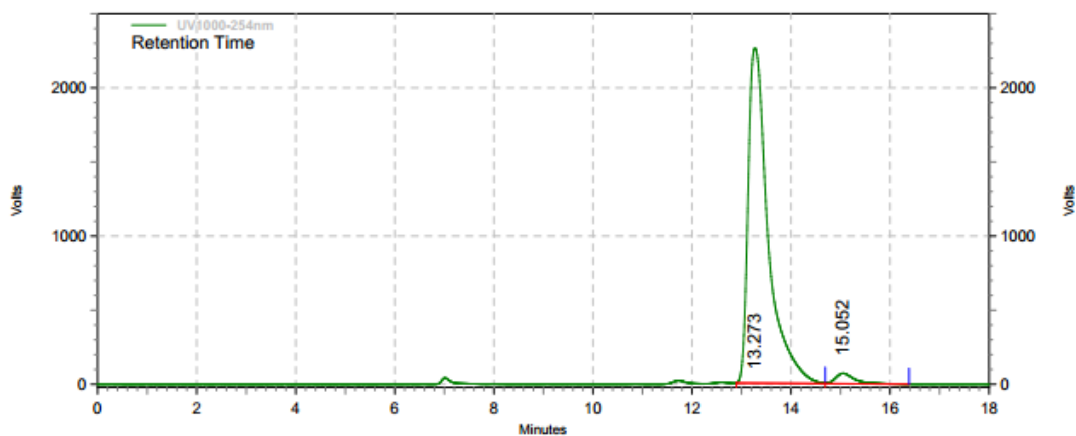

**UV1000-254nm**

**Results**

| Retention Time | Area     | Area % | Height  | Height % |
|----------------|----------|--------|---------|----------|
| 13.273         | 63558864 | 97.11  | 2260347 | 96.99    |
| 15.052         | 1888678  | 2.89   | 70077   | 3.01     |

|        |          |        |         |        |
|--------|----------|--------|---------|--------|
| Totals | 65447542 | 100.00 | 2330424 | 100.00 |
|--------|----------|--------|---------|--------|

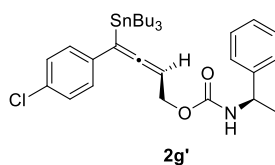

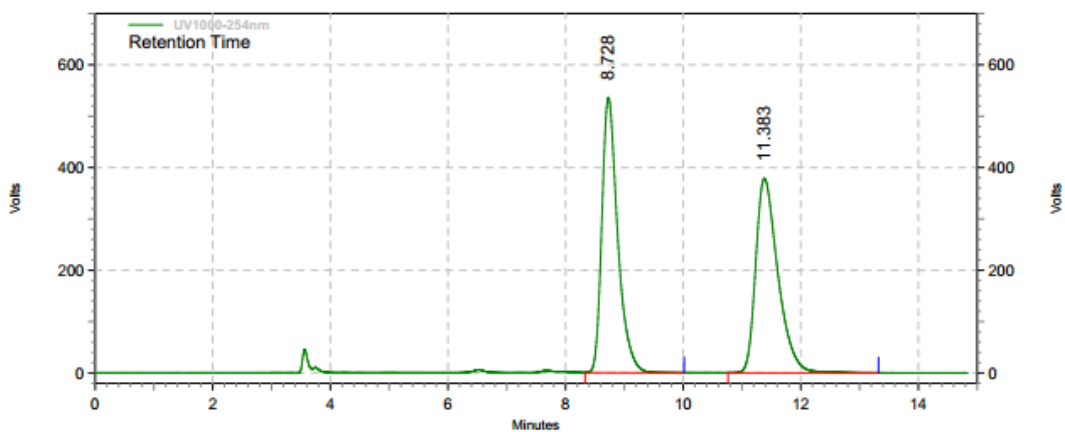

**UV1000-254nm**

**Results**

| Retention Time | Area     | Area % | Height | Height % |
|----------------|----------|--------|--------|----------|
| 8.728          | 10017603 | 50.16  | 535893 | 58.60    |
| 11.383         | 9952522  | 49.84  | 378652 | 41.40    |

| Totals | Area     | Area % | Height | Height % |
|--------|----------|--------|--------|----------|
|        | 19970125 | 100.00 | 914545 | 100.00   |

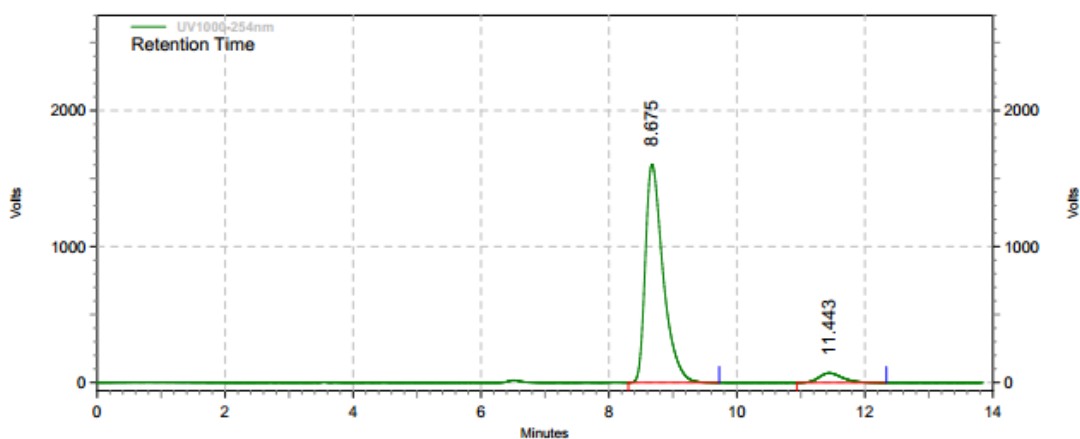

**UV1000-254nm**

**Results**

| Retention Time | Area     | Area % | Height  | Height % |
|----------------|----------|--------|---------|----------|
| 8.675          | 31025568 | 94.58  | 1604243 | 95.81    |
| 11.443         | 1779370  | 5.42   | 70101   | 4.19     |

| Totals | Area     | Area % | Height  | Height % |
|--------|----------|--------|---------|----------|
|        | 32804938 | 100.00 | 1674344 | 100.00   |

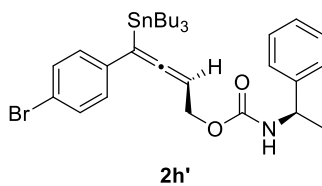

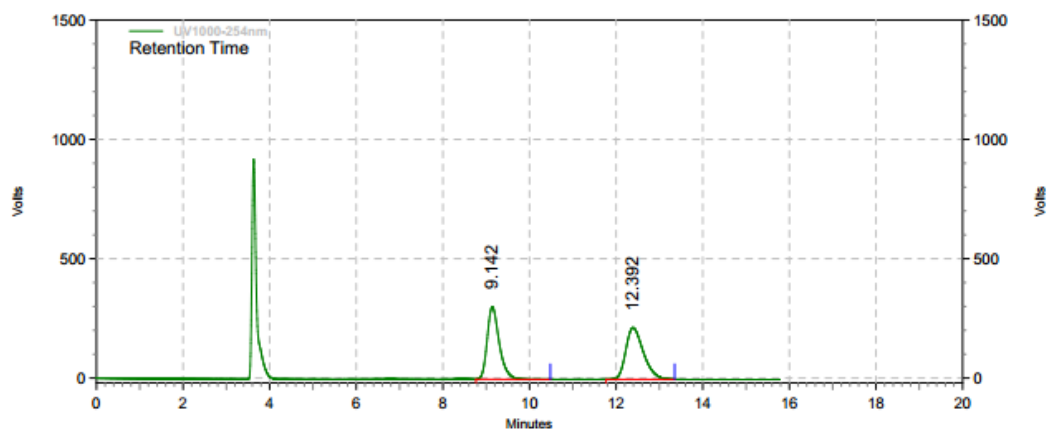

### UV1000-254nm

#### Results

| Retention Time | Area    | Area % | Height | Height % |
|----------------|---------|--------|--------|----------|
| 9.142          | 5861582 | 48.96  | 303055 | 58.36    |
| 12.392         | 6111253 | 51.04  | 216208 | 41.64    |

| Totals | Area     | Area % | Height | Height % |
|--------|----------|--------|--------|----------|
|        | 11972835 | 100.00 | 519263 | 100.00   |

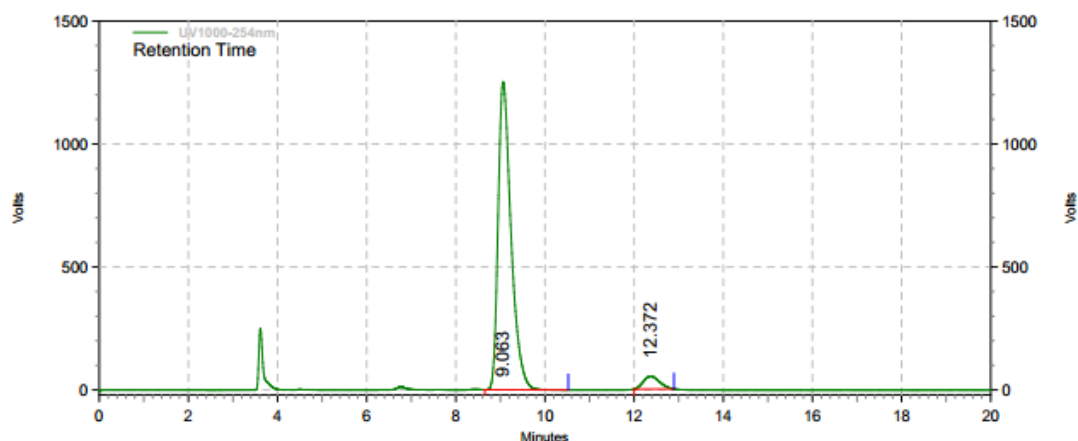

### UV1000-254nm

#### Results

| Retention Time | Area     | Area % | Height  | Height % |
|----------------|----------|--------|---------|----------|
| 9.063          | 25200193 | 95.02  | 1251543 | 95.99    |
| 12.372         | 1322089  | 4.98   | 52254   | 4.01     |

| Totals | Area     | Area % | Height  | Height % |
|--------|----------|--------|---------|----------|
|        | 26522282 | 100.00 | 1303797 | 100.00   |

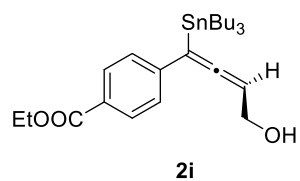

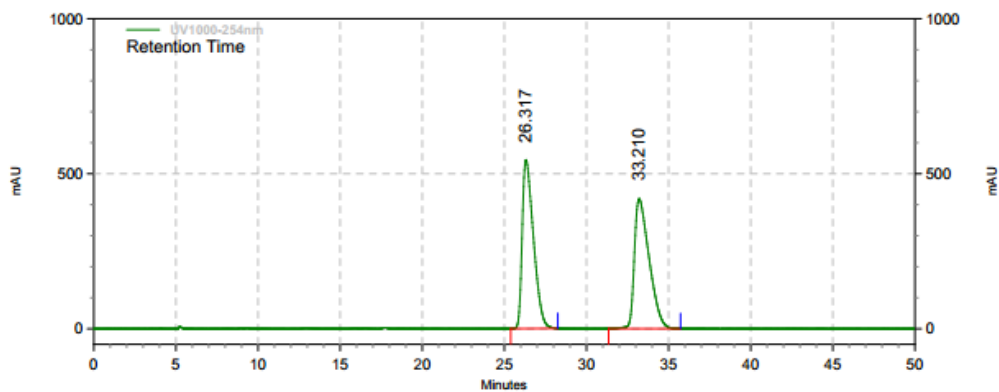

**UV1000-254nm**

**Results**

| Retention Time | Area            | Area %        | Height        | Height %      |
|----------------|-----------------|---------------|---------------|---------------|
| 26.317         | 25915772        | 49.76         | 544574        | 56.52         |
| 33.210         | 26167581        | 50.24         | 418912        | 43.48         |
| <b>Totals</b>  | <b>52083353</b> | <b>100.00</b> | <b>963486</b> | <b>100.00</b> |

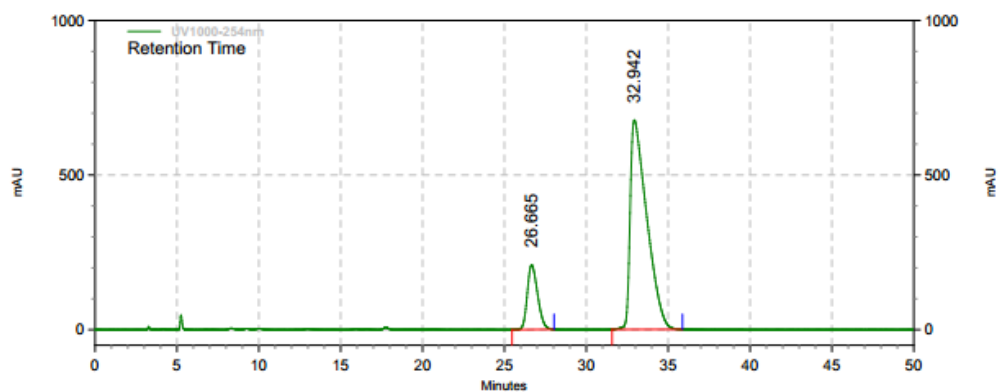

**UV1000-254nm**

**Results**

| Retention Time | Area            | Area %        | Height        | Height %      |
|----------------|-----------------|---------------|---------------|---------------|
| 26.665         | 9158729         | 16.10         | 208639        | 23.56         |
| 32.942         | 47719602        | 83.90         | 676870        | 76.44         |
| <b>Totals</b>  | <b>56878331</b> | <b>100.00</b> | <b>885509</b> | <b>100.00</b> |

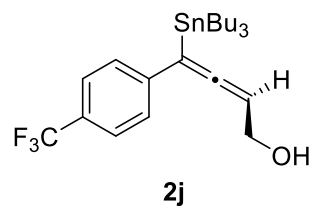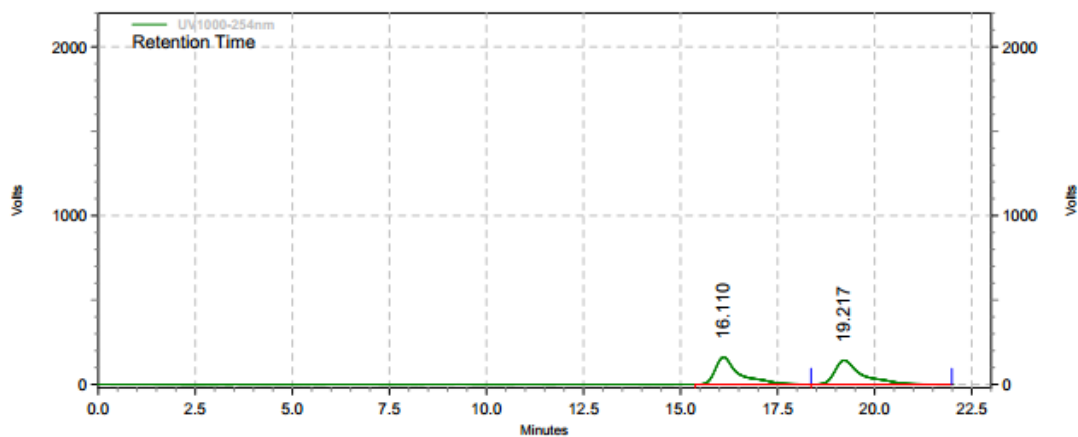

**UV1000-254nm**

**Results**

| Retention Time | Area    | Area % | Height | Height % |
|----------------|---------|--------|--------|----------|
| 16.110         | 6928406 | 49.98  | 161714 | 53.13    |
| 19.217         | 6933098 | 50.02  | 142648 | 46.87    |

|               |                 |               |               |               |
|---------------|-----------------|---------------|---------------|---------------|
| <b>Totals</b> | <b>13861504</b> | <b>100.00</b> | <b>304362</b> | <b>100.00</b> |
|---------------|-----------------|---------------|---------------|---------------|

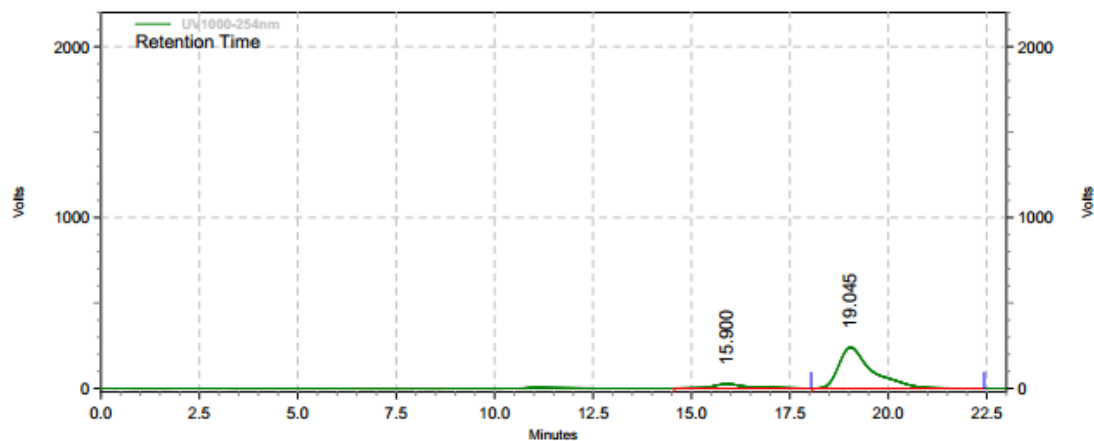

**UV1000-254nm**

**Results**

| Retention Time | Area     | Area % | Height | Height % |
|----------------|----------|--------|--------|----------|
| 15.900         | 1580384  | 10.04  | 26536  | 9.95     |
| 19.045         | 14153097 | 89.96  | 240229 | 90.05    |

|               |                 |               |               |               |
|---------------|-----------------|---------------|---------------|---------------|
| <b>Totals</b> | <b>15733481</b> | <b>100.00</b> | <b>266765</b> | <b>100.00</b> |
|---------------|-----------------|---------------|---------------|---------------|

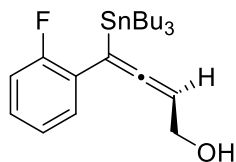

2k

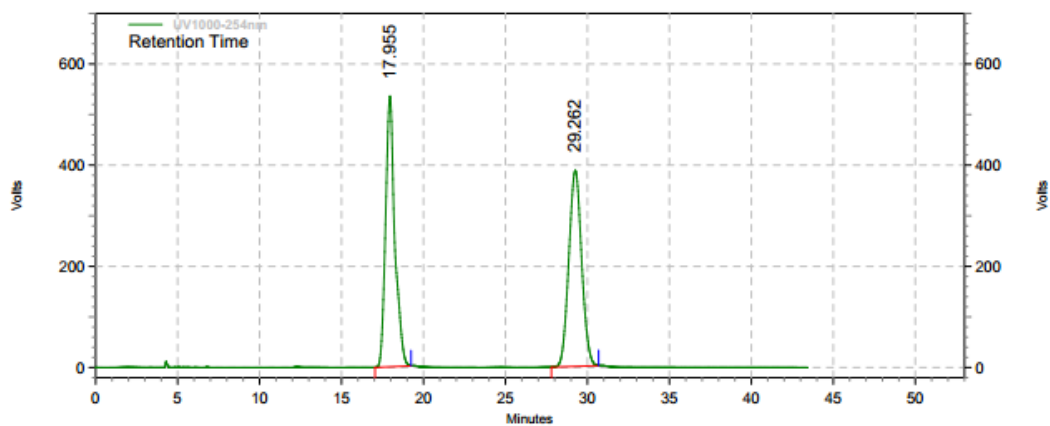

UV1000-254nm

Results

| Retention Time | Area     | Area % | Height | Height % |
|----------------|----------|--------|--------|----------|
| 17.955         | 20901670 | 49.84  | 534971 | 58.02    |
| 29.262         | 21038792 | 50.16  | 387071 | 41.98    |

|        |          |        |        |        |
|--------|----------|--------|--------|--------|
| Totals | 41940462 | 100.00 | 922042 | 100.00 |
|--------|----------|--------|--------|--------|

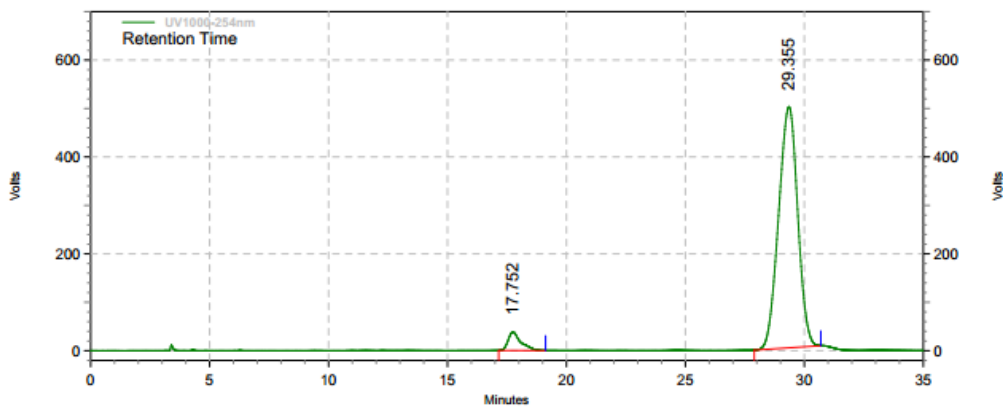

UV1000-254nm

Results

| Retention Time | Area     | Area % | Height | Height % |
|----------------|----------|--------|--------|----------|
| 17.752         | 1414723  | 4.85   | 38358  | 7.16     |
| 29.355         | 27743782 | 95.15  | 497563 | 92.84    |

|        |          |        |        |        |
|--------|----------|--------|--------|--------|
| Totals | 29158505 | 100.00 | 535921 | 100.00 |
|--------|----------|--------|--------|--------|

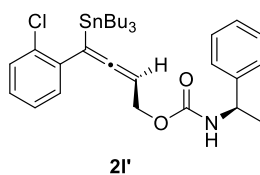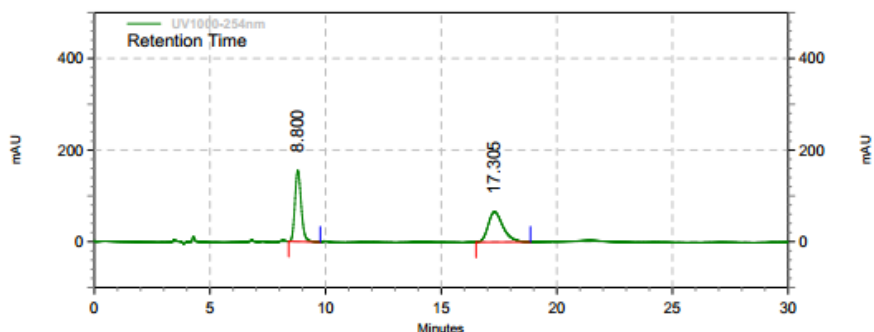

**UV1000-254nm  
Results**

| Retention Time | Area    | Area % | Height | Height % |
|----------------|---------|--------|--------|----------|
| 8.800          | 2920447 | 49.63  | 155044 | 70.12    |
| 17.305         | 2963411 | 50.37  | 66077  | 29.88    |
| Totals         | 5883858 | 100.00 | 221121 | 100.00   |

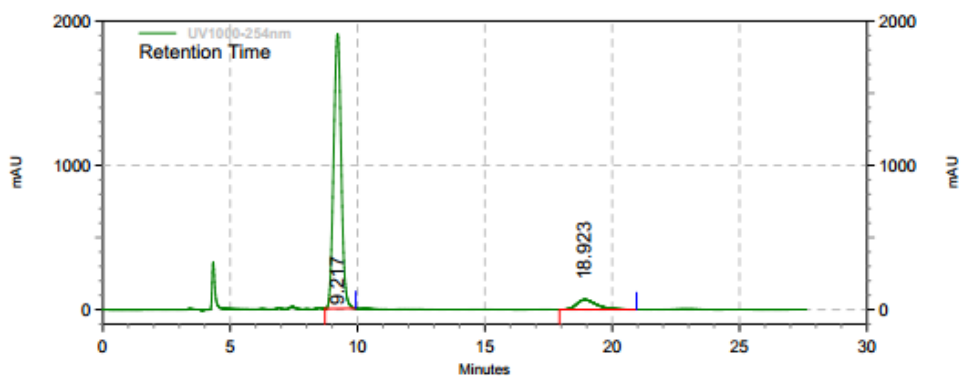

**UV1000-254nm  
Results**

| Retention Time | Area     | Area % | Height  | Height % |
|----------------|----------|--------|---------|----------|
| 9.217          | 39195824 | 91.31  | 1902846 | 96.54    |
| 18.923         | 3729577  | 8.69   | 68208   | 3.46     |
| Totals         | 42925401 | 100.00 | 1971054 | 100.00   |



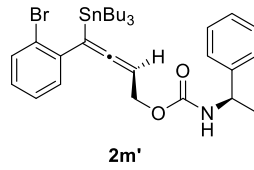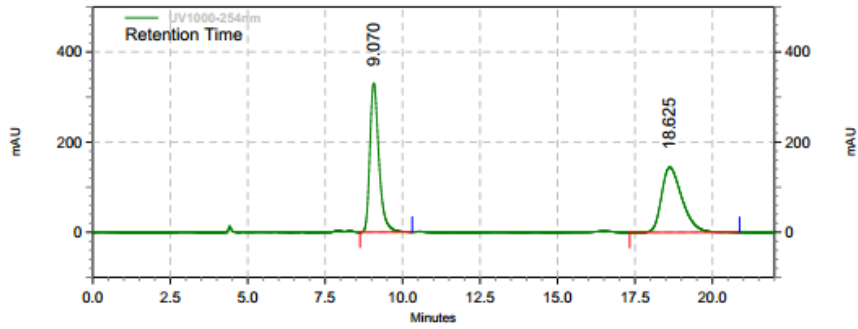

**UV1000-254nm  
Results**

| Retention Time | Area            | Area %        | Height        | Height %      |
|----------------|-----------------|---------------|---------------|---------------|
| 9.070          | 6711166         | 50.19         | 330661        | 69.59         |
| 18.625         | 6661070         | 49.81         | 144461        | 30.41         |
| <b>Totals</b>  | <b>13372236</b> | <b>100.00</b> | <b>475122</b> | <b>100.00</b> |

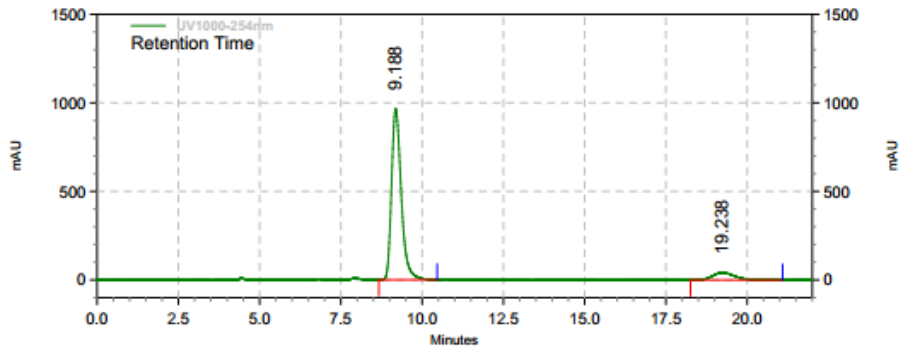

**UV1000-254nm  
Results**

| Retention Time | Area            | Area %        | Height         | Height %      |
|----------------|-----------------|---------------|----------------|---------------|
| 9.188          | 20065969        | 91.08         | 965298         | 95.89         |
| 19.238         | 1964046         | 8.92          | 41420          | 4.11          |
| <b>Totals</b>  | <b>22030015</b> | <b>100.00</b> | <b>1006718</b> | <b>100.00</b> |

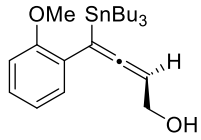

2n

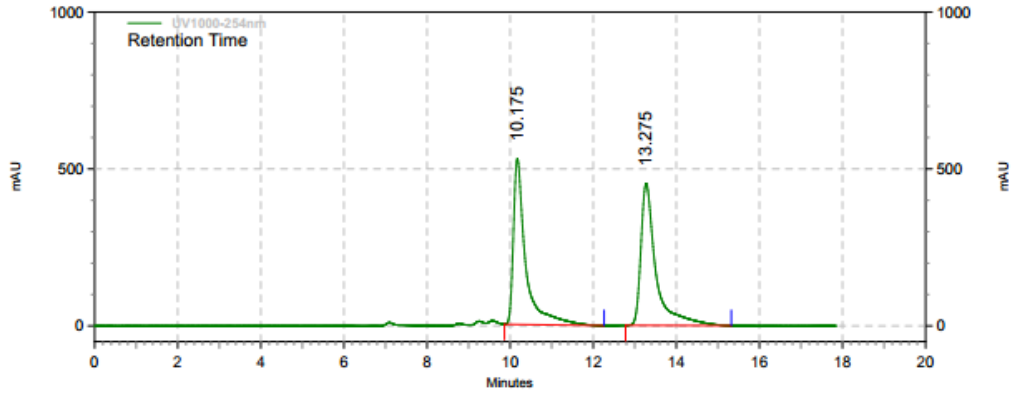

**UV1000-254nm  
Results**

| Retention Time | Area     | Area % | Height | Height % |
|----------------|----------|--------|--------|----------|
| 10.175         | 10844388 | 48.85  | 527729 | 53.86    |
| 13.275         | 11356625 | 51.15  | 452163 | 46.14    |

|        |          |        |        |        |
|--------|----------|--------|--------|--------|
| Totals | 22201013 | 100.00 | 979892 | 100.00 |
|--------|----------|--------|--------|--------|

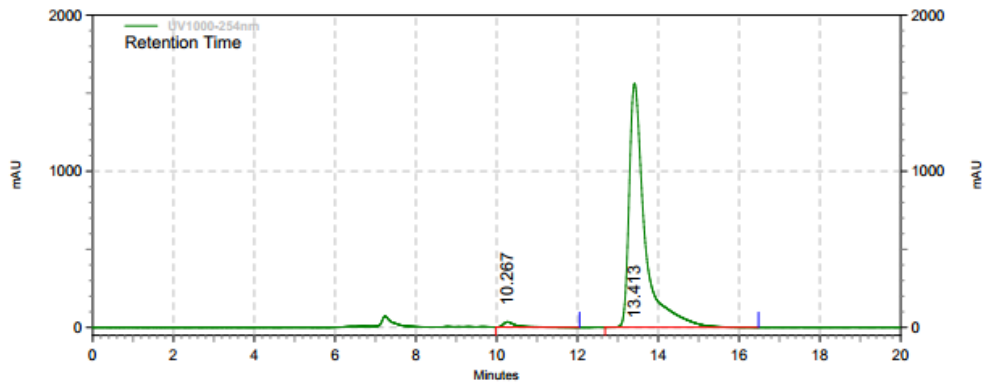

**UV1000-254nm  
Results**

| Retention Time | Area     | Area % | Height  | Height % |
|----------------|----------|--------|---------|----------|
| 10.267         | 705654   | 1.66   | 33306   | 2.09     |
| 13.413         | 41917060 | 98.34  | 1559407 | 97.91    |

|        |          |        |         |        |
|--------|----------|--------|---------|--------|
| Totals | 42622714 | 100.00 | 1592713 | 100.00 |
|--------|----------|--------|---------|--------|

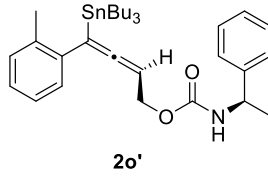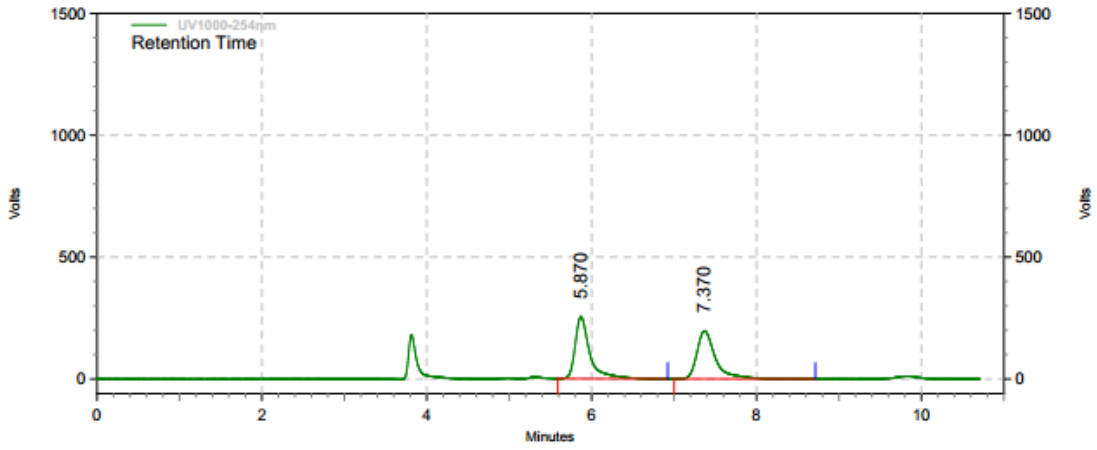

**UV1000-254nm  
Results**

| Retention Time | Area    | Area % | Height | Height % |
|----------------|---------|--------|--------|----------|
| 5.870          | 3149906 | 50.62  | 254609 | 56.36    |
| 7.370          | 3072420 | 49.38  | 197177 | 43.64    |

| Totals | Area    | Area % | Height | Height % |
|--------|---------|--------|--------|----------|
|        | 6222326 | 100.00 | 451786 | 100.00   |

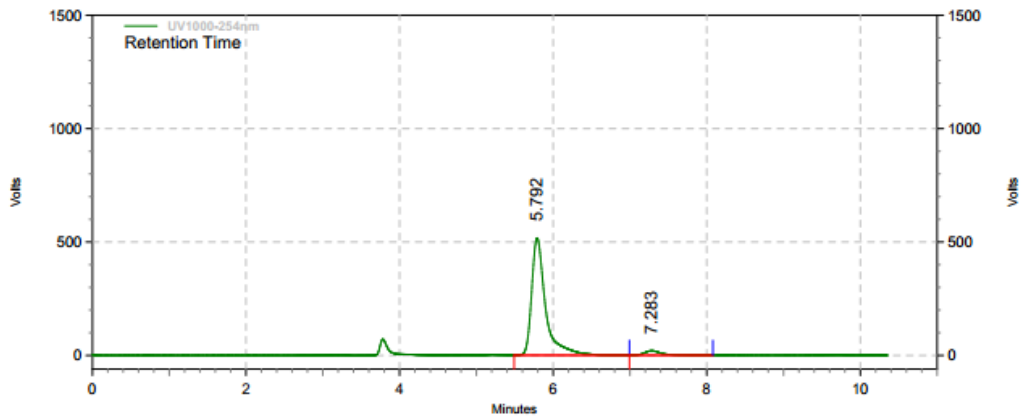

**UV1000-254nm  
Results**

| Retention Time | Area    | Area % | Height | Height % |
|----------------|---------|--------|--------|----------|
| 5.792          | 6512573 | 95.58  | 517103 | 96.32    |
| 7.283          | 301306  | 4.42   | 19757  | 3.68     |

| Totals | Area    | Area % | Height | Height % |
|--------|---------|--------|--------|----------|
|        | 6813879 | 100.00 | 536860 | 100.00   |

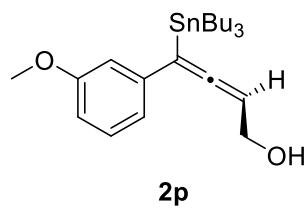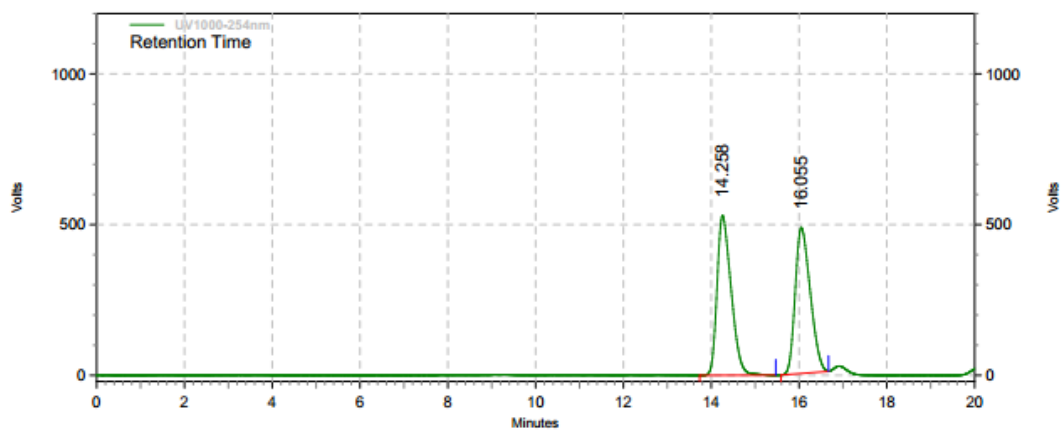

**UV1000-254nm**

**Results**

| Retention Time | Area     | Area % | Height | Height % |
|----------------|----------|--------|--------|----------|
| 14.258         | 11782291 | 50.59  | 529562 | 52.29    |
| 16.055         | 11505393 | 49.41  | 483188 | 47.71    |

| Totals | Area     | Area % | Height  | Height % |
|--------|----------|--------|---------|----------|
|        | 23287684 | 100.00 | 1012750 | 100.00   |

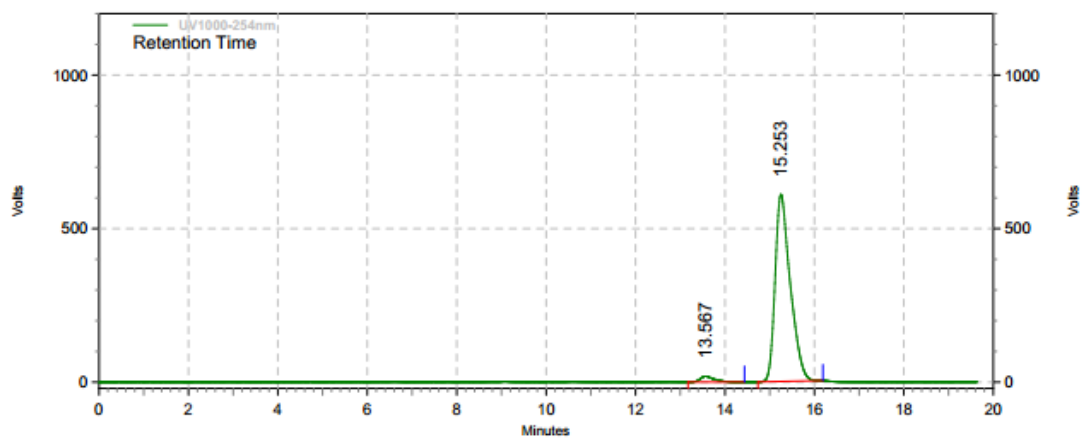

**UV1000-254nm**

**Results**

| Retention Time | Area     | Area % | Height | Height % |
|----------------|----------|--------|--------|----------|
| 13.567         | 404733   | 2.75   | 18775  | 2.99     |
| 15.253         | 14321329 | 97.25  | 608949 | 97.01    |

| Totals | Area     | Area % | Height | Height % |
|--------|----------|--------|--------|----------|
|        | 14726062 | 100.00 | 627724 | 100.00   |

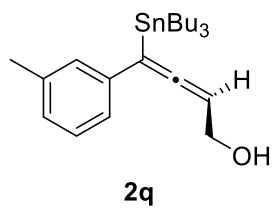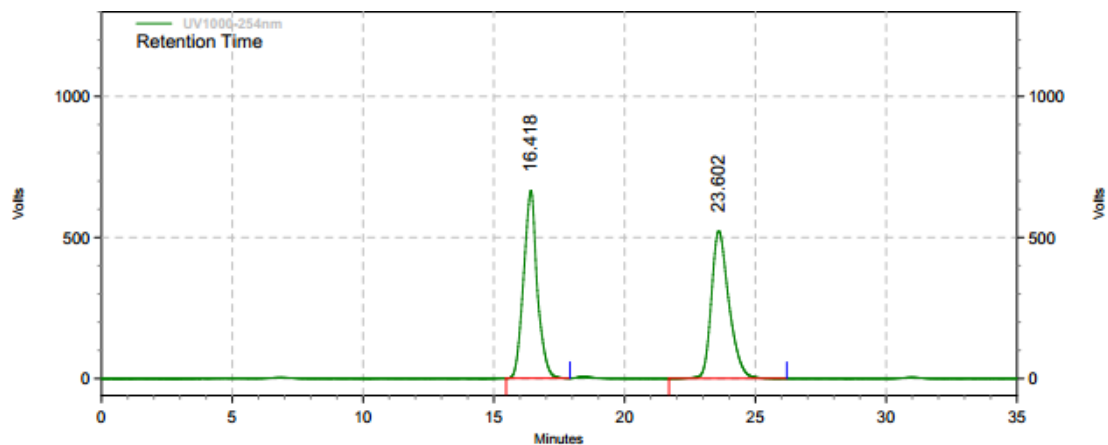

**UV1000-254nm  
Results**

| Retention Time | Area     | Area % | Height | Height % |
|----------------|----------|--------|--------|----------|
| 16.418         | 24108190 | 49.74  | 664329 | 55.96    |
| 23.602         | 24356052 | 50.26  | 522762 | 44.04    |

| Totals | Area     | Area % | Height  | Height % |
|--------|----------|--------|---------|----------|
|        | 48464242 | 100.00 | 1187091 | 100.00   |

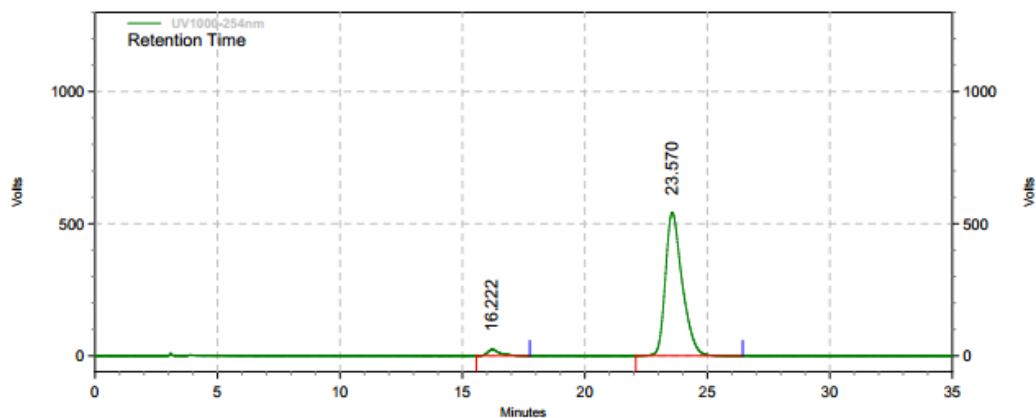

**UV1000-254nm  
Results**

| Retention Time | Area     | Area % | Height | Height % |
|----------------|----------|--------|--------|----------|
| 16.222         | 832903   | 3.13   | 24079  | 4.25     |
| 23.570         | 25785143 | 96.87  | 542884 | 95.75    |

| Totals | Area     | Area % | Height | Height % |
|--------|----------|--------|--------|----------|
|        | 26618046 | 100.00 | 566963 | 100.00   |

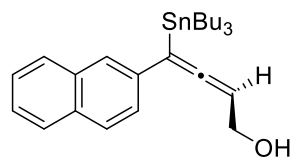

2r

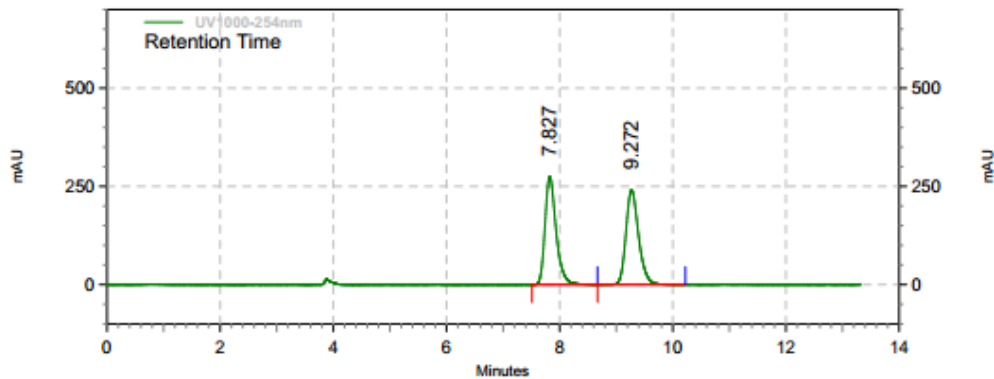

**UV1000-254nm  
Results**

| Retention Time | Area    | Area % | Height | Height % |
|----------------|---------|--------|--------|----------|
| 7.827          | 3741900 | 50.00  | 274154 | 53.29    |
| 9.272          | 3741186 | 50.00  | 240325 | 46.71    |

|        |         |        |        |        |
|--------|---------|--------|--------|--------|
| Totals | 7483086 | 100.00 | 514479 | 100.00 |
|--------|---------|--------|--------|--------|

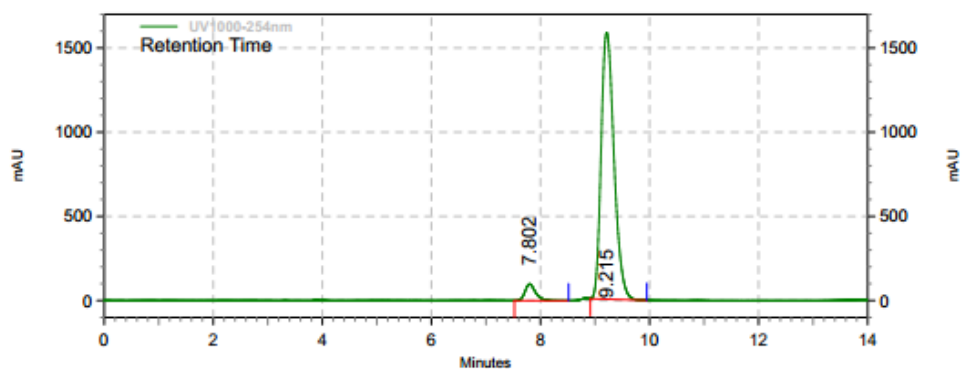

**UV1000-254nm  
Results**

| Retention Time | Area     | Area % | Height  | Height % |
|----------------|----------|--------|---------|----------|
| 7.802          | 1317446  | 4.82   | 98463   | 5.86     |
| 9.215          | 25987926 | 95.18  | 1582456 | 94.14    |

|        |          |        |         |        |
|--------|----------|--------|---------|--------|
| Totals | 27305372 | 100.00 | 1680919 | 100.00 |
|--------|----------|--------|---------|--------|

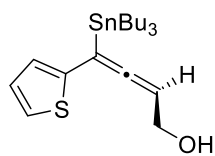

**2s**

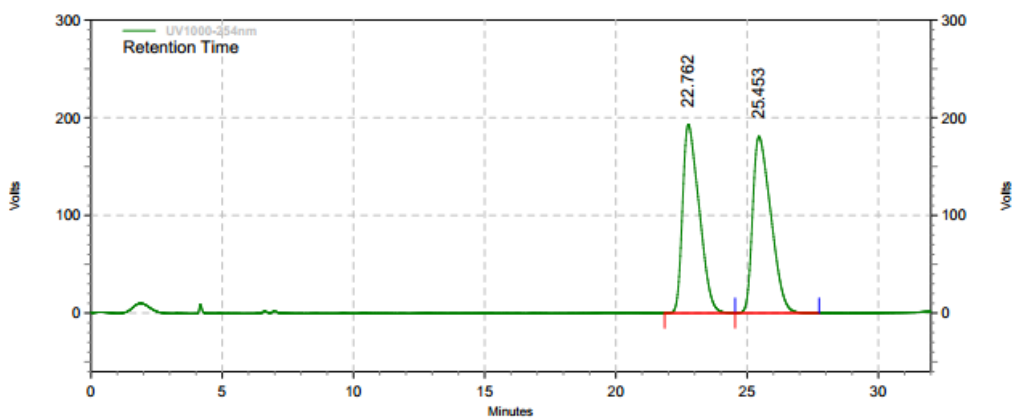

**UV1000-254nm**

**Results**

| Retention Time | Area    | Area % | Height | Height % |
|----------------|---------|--------|--------|----------|
| 22.762         | 8509280 | 49.32  | 193223 | 51.67    |
| 25.453         | 8743402 | 50.68  | 180762 | 48.33    |

| Totals | Area     | Area % | Height | Height % |
|--------|----------|--------|--------|----------|
|        | 17252682 | 100.00 | 373985 | 100.00   |

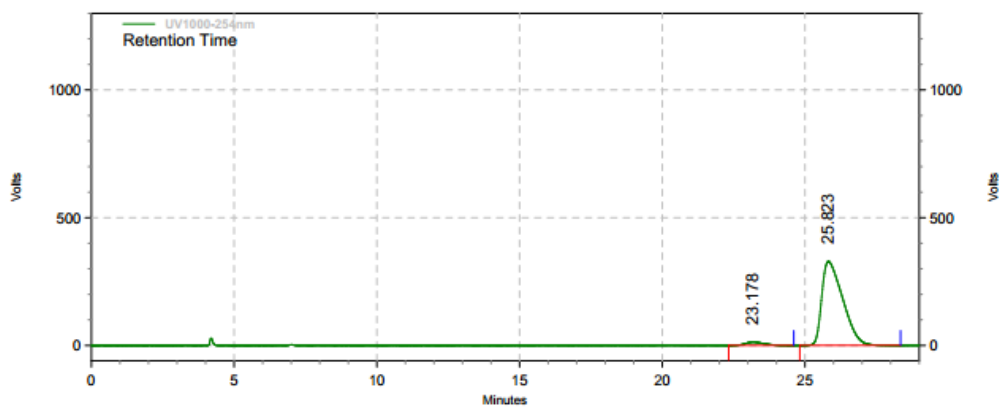

**UV1000-254nm**

**Results**

| Retention Time | Area     | Area % | Height | Height % |
|----------------|----------|--------|--------|----------|
| 23.178         | 560511   | 3.25   | 12935  | 3.79     |
| 25.823         | 16704709 | 96.75  | 328469 | 96.21    |

| Totals | Area     | Area % | Height | Height % |
|--------|----------|--------|--------|----------|
|        | 17265220 | 100.00 | 341404 | 100.00   |

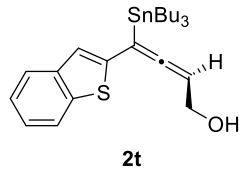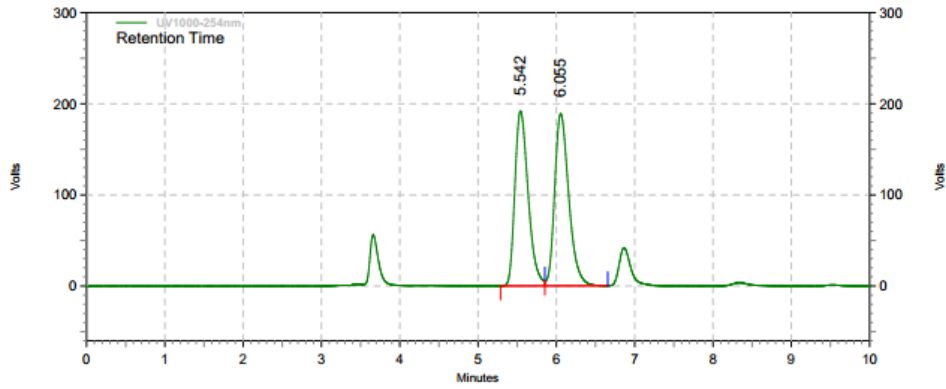

**UV1000-254nm  
Results**

| Retention Time | Area    | Area % | Height | Height % |
|----------------|---------|--------|--------|----------|
| 5.542          | 2258230 | 48.77  | 191842 | 50.40    |
| 6.055          | 2372048 | 51.23  | 188768 | 49.60    |

| Totals | Area    | Area % | Height | Height % |
|--------|---------|--------|--------|----------|
|        | 4630278 | 100.00 | 380610 | 100.00   |

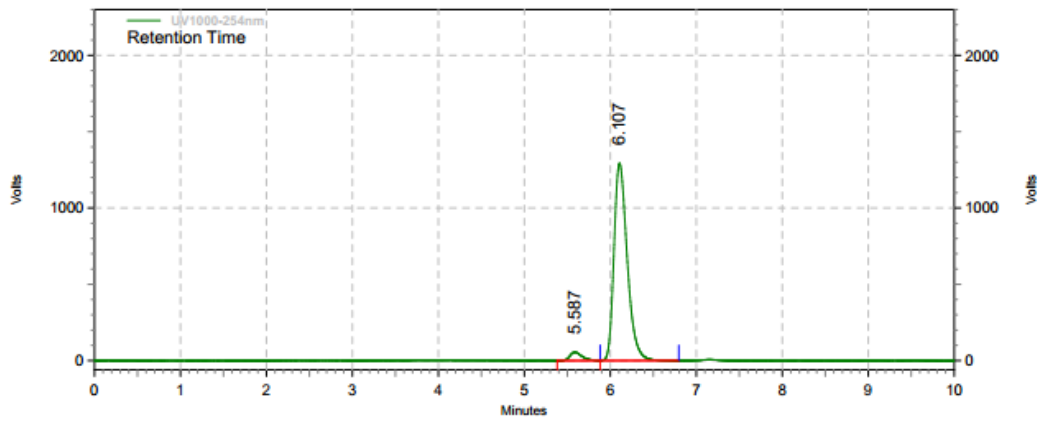

**UV1000-254nm  
Results**

| Retention Time | Area     | Area % | Height  | Height % |
|----------------|----------|--------|---------|----------|
| 5.587          | 545013   | 3.79   | 55554   | 4.12     |
| 6.107          | 13825041 | 96.21  | 1292092 | 95.88    |

| Totals | Area     | Area % | Height  | Height % |
|--------|----------|--------|---------|----------|
|        | 14370054 | 100.00 | 1347646 | 100.00   |



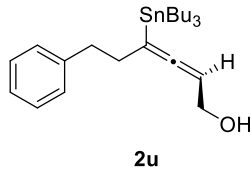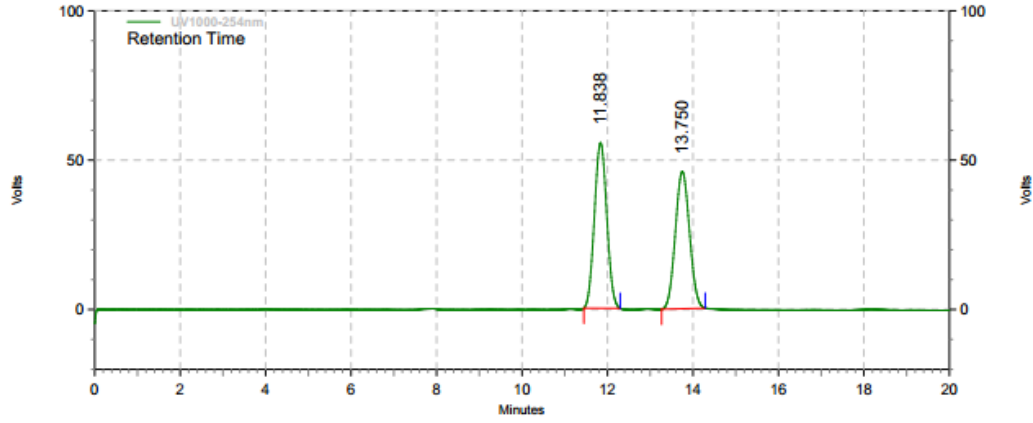

**UV1000-254nm  
Results**

| Retention Time | Area    | Area % | Height | Height % |
|----------------|---------|--------|--------|----------|
| 11.838         | 1114971 | 51.25  | 55384  | 54.66    |
| 13.750         | 1060426 | 48.75  | 45937  | 45.34    |

|        |         |        |        |        |
|--------|---------|--------|--------|--------|
| Totals | 2175397 | 100.00 | 101321 | 100.00 |
|--------|---------|--------|--------|--------|

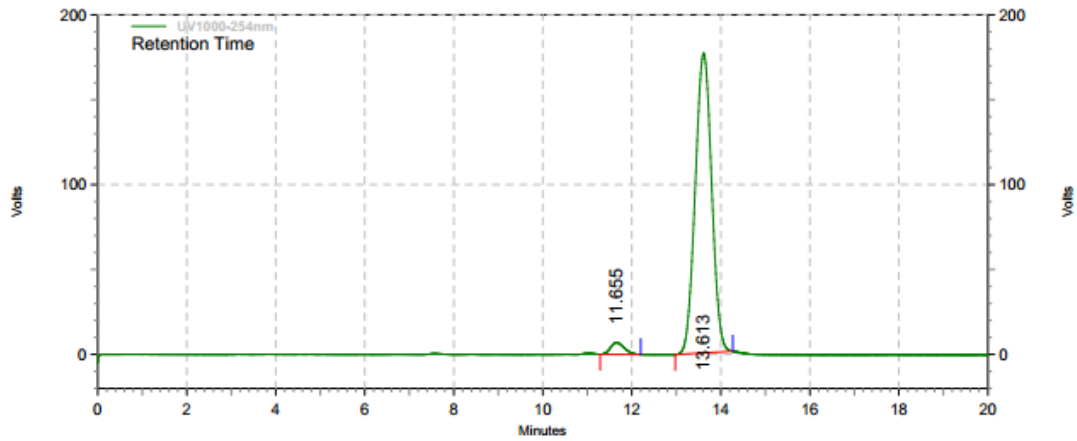

**UV1000-254nm  
Results**

| Retention Time | Area    | Area % | Height | Height % |
|----------------|---------|--------|--------|----------|
| 11.655         | 147857  | 3.17   | 6960   | 3.79     |
| 13.613         | 4511255 | 96.83  | 176448 | 96.21    |

|        |         |        |        |        |
|--------|---------|--------|--------|--------|
| Totals | 4659112 | 100.00 | 183408 | 100.00 |
|--------|---------|--------|--------|--------|

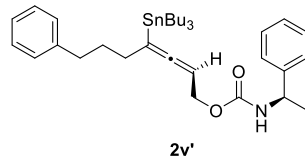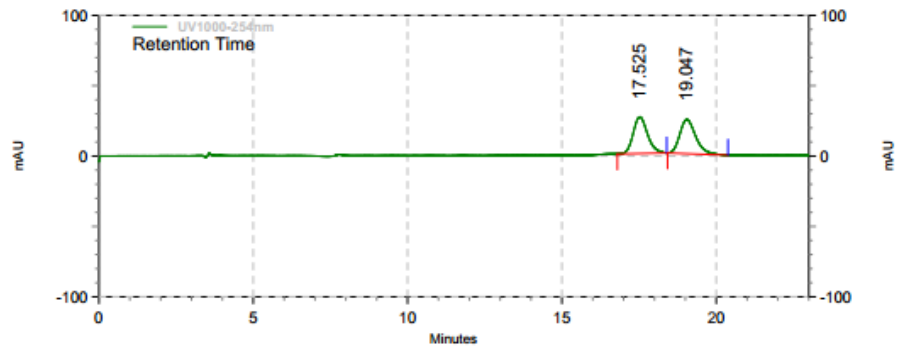

**UV1000-254nm  
Results**

| Retention Time | Area           | Area %        | Height       | Height %      |
|----------------|----------------|---------------|--------------|---------------|
| 17.525         | 836650         | 49.04         | 25985        | 51.75         |
| 19.047         | 869380         | 50.96         | 24231        | 48.25         |
| <b>Totals</b>  | <b>1706030</b> | <b>100.00</b> | <b>50216</b> | <b>100.00</b> |

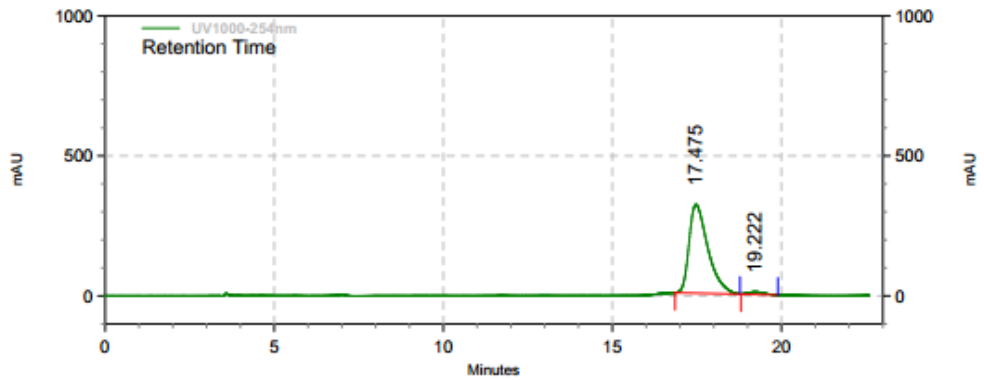

**UV1000-254nm  
Results**

| Retention Time | Area            | Area %        | Height        | Height %      |
|----------------|-----------------|---------------|---------------|---------------|
| 17.475         | 12233166        | 97.79         | 316406        | 97.26         |
| 19.222         | 276753          | 2.21          | 8913          | 2.74          |
| <b>Totals</b>  | <b>12509919</b> | <b>100.00</b> | <b>325319</b> | <b>100.00</b> |

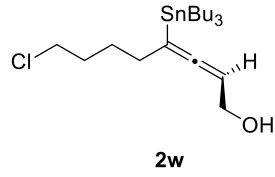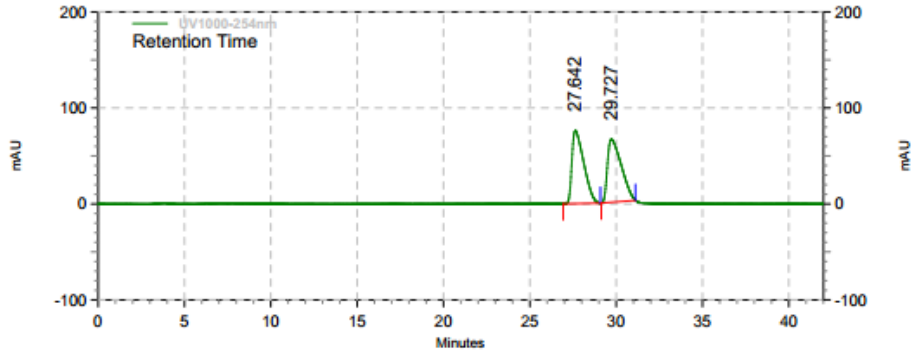

**UV1000-254nm  
Results**

| Retention Time | Area    | Area % | Height | Height % |
|----------------|---------|--------|--------|----------|
| 27.642         | 3623932 | 49.86  | 75982  | 53.69    |
| 29.727         | 3644994 | 50.14  | 65540  | 46.31    |

| Totals | Area    | Area % | Height | Height % |
|--------|---------|--------|--------|----------|
|        | 7268926 | 100.00 | 141522 | 100.00   |

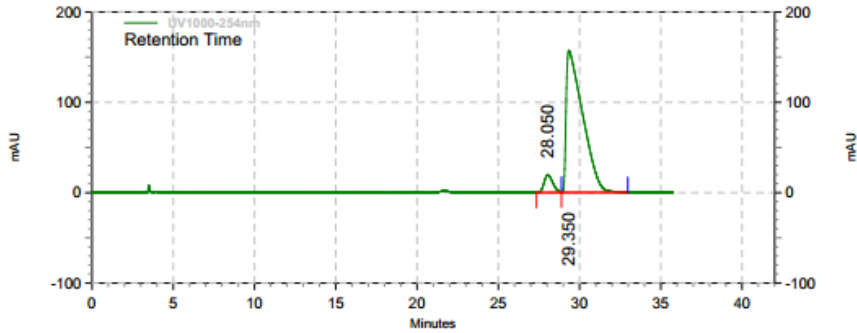

**UV1000-254nm  
Results**

| Retention Time | Area     | Area % | Height | Height % |
|----------------|----------|--------|--------|----------|
| 28.050         | 725059   | 6.14   | 19498  | 11.05    |
| 29.350         | 11082558 | 93.86  | 156948 | 88.95    |

| Totals | Area     | Area % | Height | Height % |
|--------|----------|--------|--------|----------|
|        | 11807617 | 100.00 | 176446 | 100.00   |

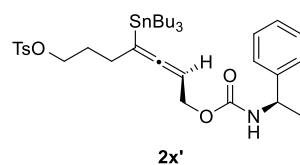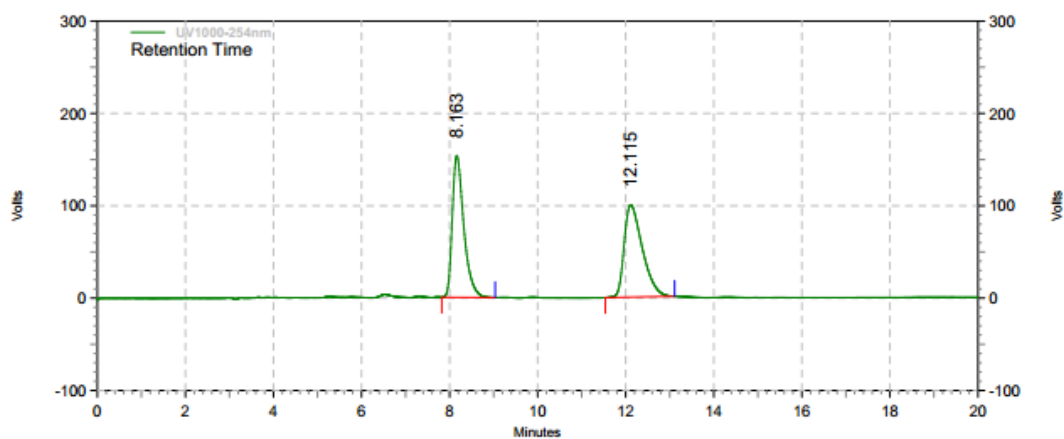

**UV1000-254nm  
Results**

| Retention Time | Area    | Area % | Height | Height % |
|----------------|---------|--------|--------|----------|
| 8.163          | 2798842 | 49.43  | 153548 | 60.59    |
| 12.115         | 2862978 | 50.57  | 99883  | 39.41    |

| Totals | Area    | Area % | Height | Height % |
|--------|---------|--------|--------|----------|
|        | 5661820 | 100.00 | 253431 | 100.00   |

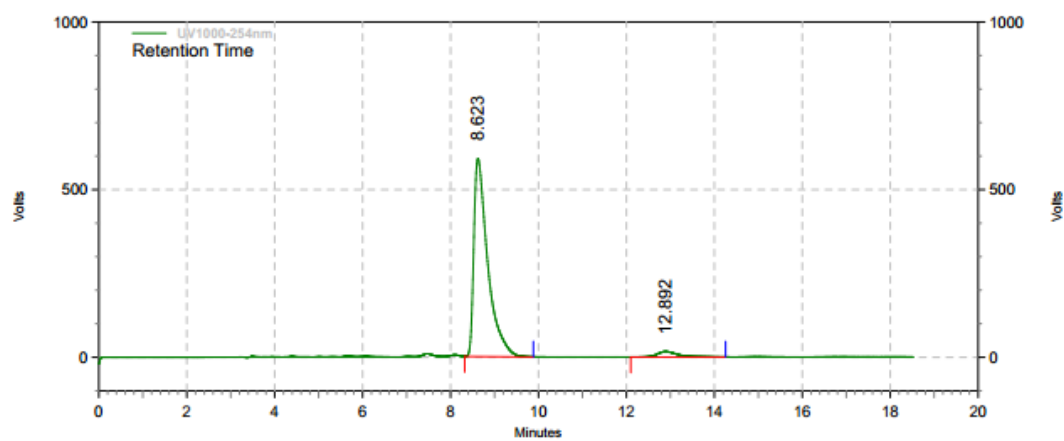

**UV1000-254nm  
Results**

| Retention Time | Area     | Area % | Height | Height % |
|----------------|----------|--------|--------|----------|
| 8.623          | 12951588 | 96.11  | 589935 | 97.31    |
| 12.892         | 523754   | 3.89   | 16279  | 2.69     |

| Totals | Area     | Area % | Height | Height % |
|--------|----------|--------|--------|----------|
|        | 13475342 | 100.00 | 606214 | 100.00   |

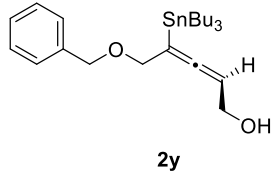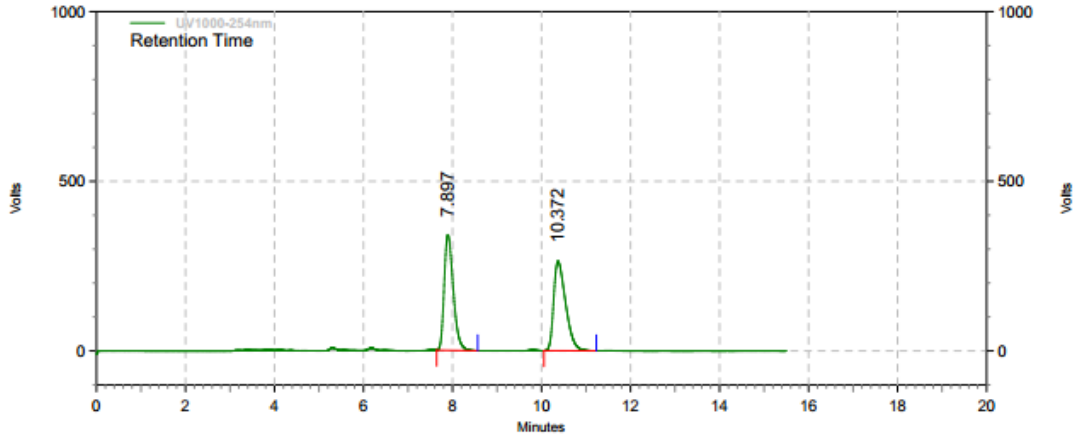

**UV1000-254nm**

**Results**

| Retention Time | Area    | Area % | Height | Height % |
|----------------|---------|--------|--------|----------|
| 7.897          | 4842603 | 49.58  | 340715 | 56.38    |
| 10.372         | 4925472 | 50.42  | 263625 | 43.62    |

|               |                |               |               |               |
|---------------|----------------|---------------|---------------|---------------|
| <b>Totals</b> | <b>9768075</b> | <b>100.00</b> | <b>604340</b> | <b>100.00</b> |
|---------------|----------------|---------------|---------------|---------------|

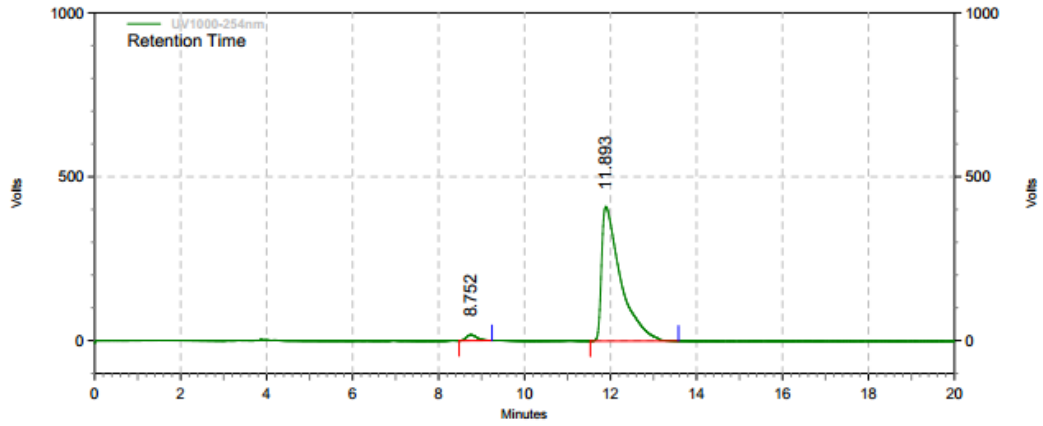

**UV1000-254nm**

**Results**

| Retention Time | Area     | Area % | Height | Height % |
|----------------|----------|--------|--------|----------|
| 8.752          | 296004   | 2.30   | 17606  | 4.12     |
| 11.893         | 12589565 | 97.70  | 410009 | 95.88    |

|               |                 |               |               |               |
|---------------|-----------------|---------------|---------------|---------------|
| <b>Totals</b> | <b>12885569</b> | <b>100.00</b> | <b>427615</b> | <b>100.00</b> |
|---------------|-----------------|---------------|---------------|---------------|

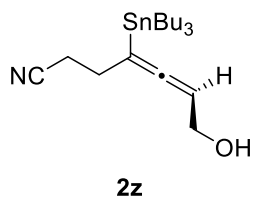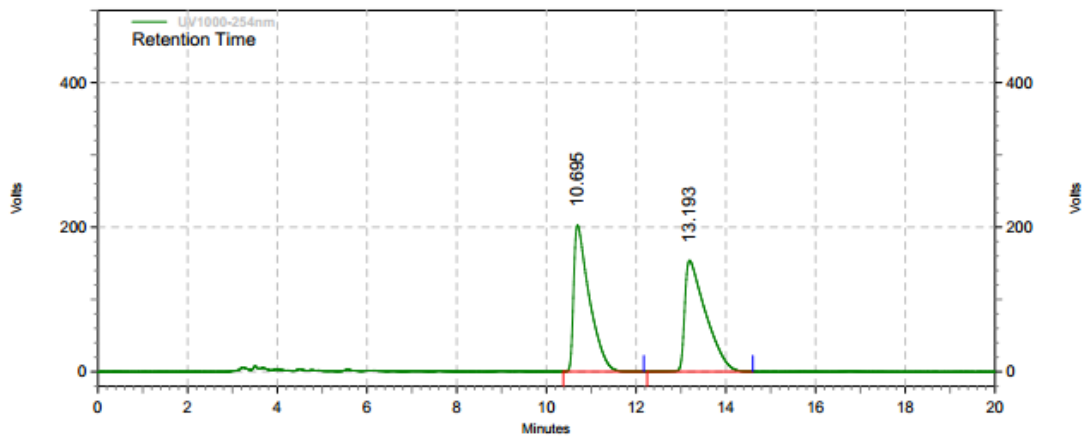

**UV1000-254nm  
Results**

| Retention Time | Area    | Area % | Height | Height % |
|----------------|---------|--------|--------|----------|
| 10.695         | 4910706 | 49.57  | 202331 | 56.81    |
| 13.193         | 4995353 | 50.43  | 153793 | 43.19    |

| Totals | Area    | Area % | Height | Height % |
|--------|---------|--------|--------|----------|
|        | 9906059 | 100.00 | 356124 | 100.00   |

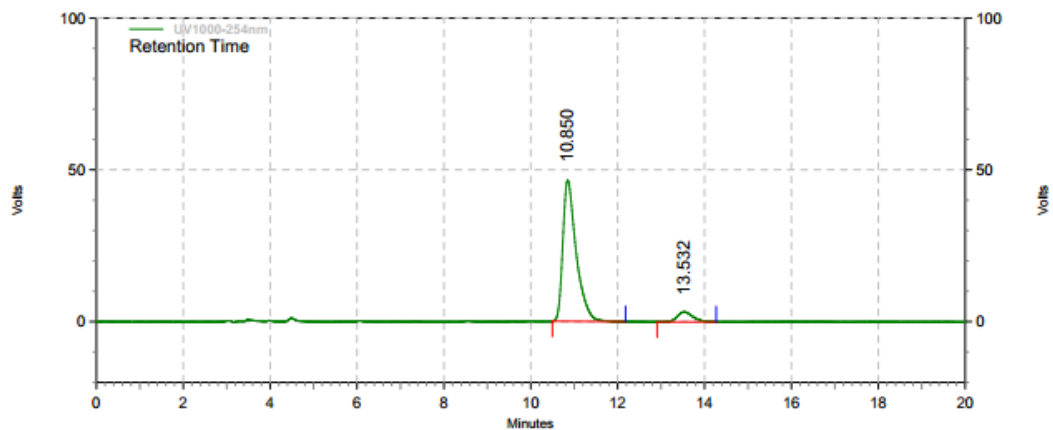

**UV1000-254nm  
Results**

| Retention Time | Area   | Area % | Height | Height % |
|----------------|--------|--------|--------|----------|
| 10.850         | 992279 | 92.36  | 46452  | 93.41    |
| 13.532         | 82090  | 7.64   | 3278   | 6.59     |

| Totals | Area    | Area % | Height | Height % |
|--------|---------|--------|--------|----------|
|        | 1074369 | 100.00 | 49730  | 100.00   |

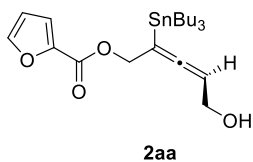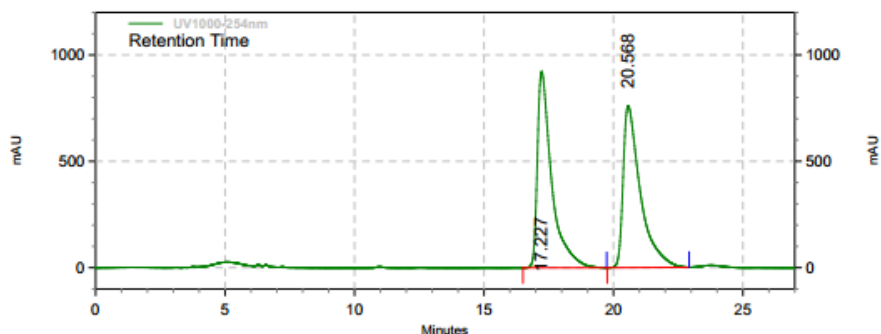

**UV1000-254nm  
Results**

| Retention Time | Area            | Area %        | Height         | Height %      |
|----------------|-----------------|---------------|----------------|---------------|
| 17.227         | 35317177        | 50.14         | 921959         | 54.80         |
| 20.568         | 35126439        | 49.86         | 760343         | 45.20         |
| <b>Totals</b>  | <b>70443616</b> | <b>100.00</b> | <b>1682302</b> | <b>100.00</b> |

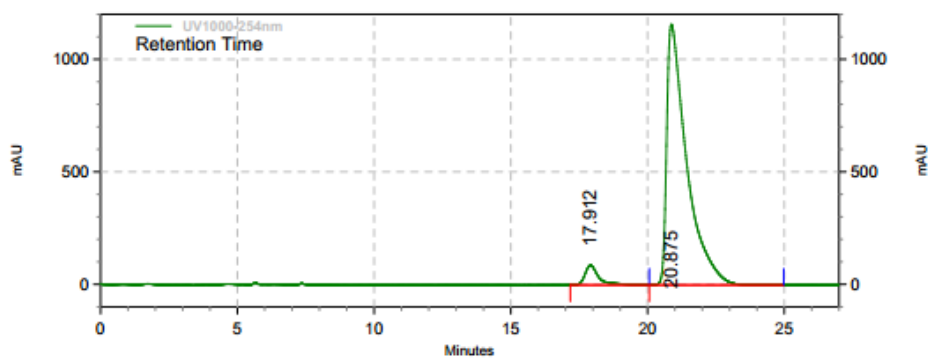

**UV1000-254nm  
Results**

| Retention Time | Area            | Area %        | Height         | Height %      |
|----------------|-----------------|---------------|----------------|---------------|
| 17.912         | 3082889         | 4.98          | 88105          | 7.07          |
| 20.875         | 58817876        | 95.02         | 1158034        | 92.93         |
| <b>Totals</b>  | <b>61900765</b> | <b>100.00</b> | <b>1246139</b> | <b>100.00</b> |

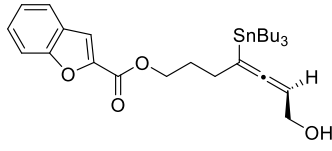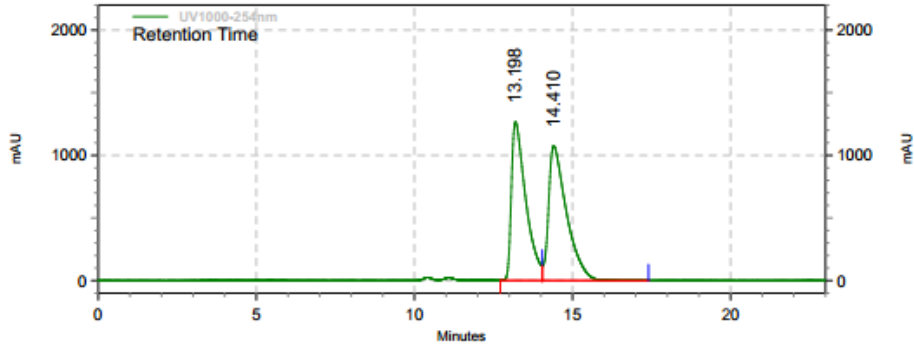

**UV1000-254nm  
Results**

| Retention Time | Area            | Area %        | Height         | Height %      |
|----------------|-----------------|---------------|----------------|---------------|
| 13.198         | 39933441        | 48.39         | 1264960        | 54.07         |
| 14.410         | 42583373        | 51.61         | 1074578        | 45.93         |
| <b>Totals</b>  | <b>82516814</b> | <b>100.00</b> | <b>2339538</b> | <b>100.00</b> |

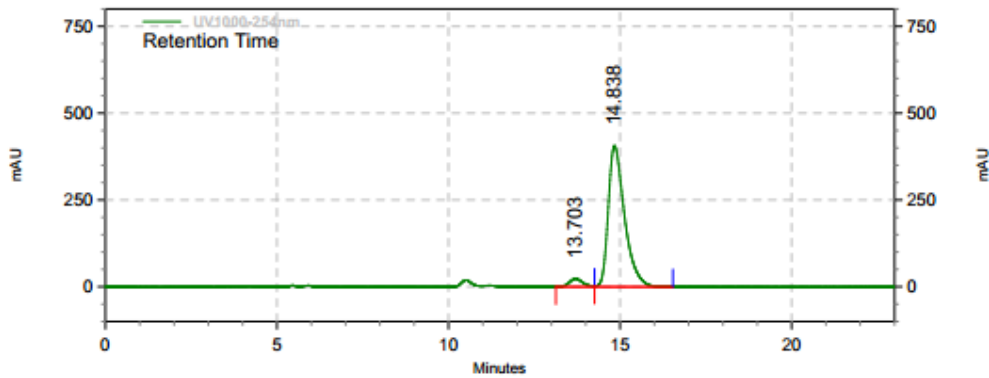

**UV1000-254nm  
Results**

| Retention Time | Area            | Area %        | Height        | Height %      |
|----------------|-----------------|---------------|---------------|---------------|
| 13.703         | 628752          | 4.50          | 23294         | 5.43          |
| 14.838         | 13358766        | 95.50         | 406017        | 94.57         |
| <b>Totals</b>  | <b>13987518</b> | <b>100.00</b> | <b>429311</b> | <b>100.00</b> |



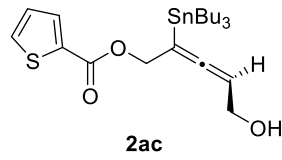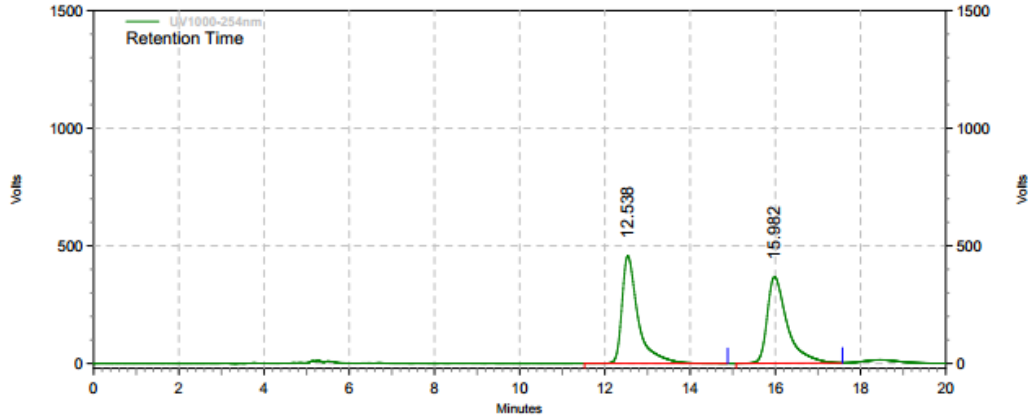

**UV1000-254nm**

**Results**

| Retention Time | Area     | Area % | Height | Height % |
|----------------|----------|--------|--------|----------|
| 12.538         | 12028007 | 50.12  | 456769 | 55.40    |
| 15.982         | 11970327 | 49.88  | 367674 | 44.60    |

| Totals | Area     | Area % | Height | Height % |
|--------|----------|--------|--------|----------|
|        | 23998334 | 100.00 | 824443 | 100.00   |

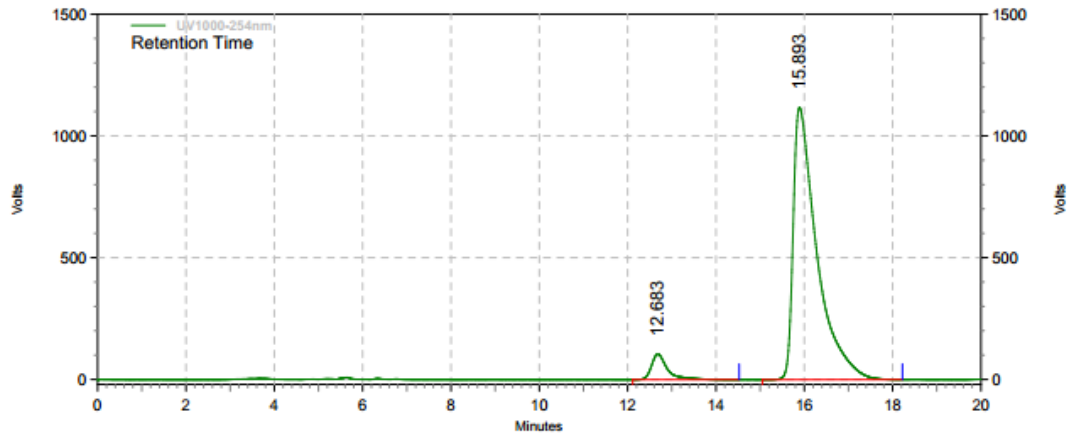

**UV1000-254nm**

**Results**

| Retention Time | Area     | Area % | Height  | Height % |
|----------------|----------|--------|---------|----------|
| 12.683         | 2608054  | 5.91   | 104852  | 8.58     |
| 15.893         | 41550259 | 94.09  | 1117216 | 91.42    |

| Totals | Area     | Area % | Height  | Height % |
|--------|----------|--------|---------|----------|
|        | 44158313 | 100.00 | 1222068 | 100.00   |

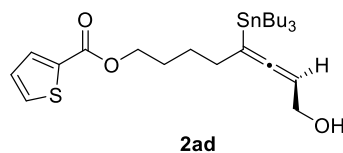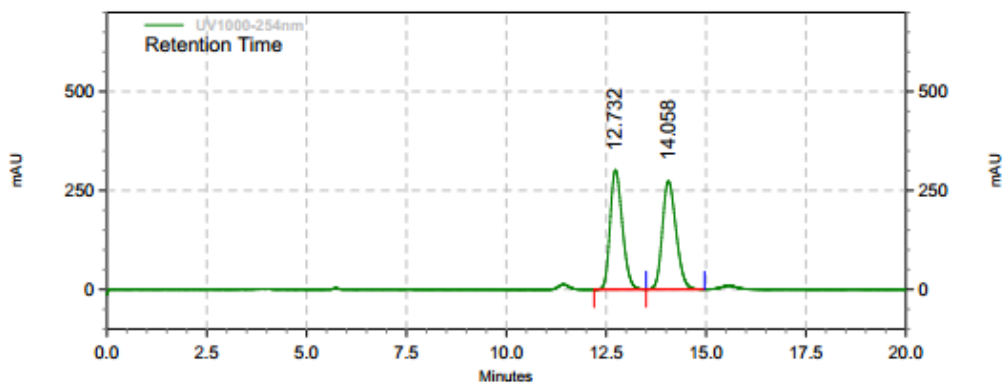

**UV1000-254nm  
Results**

| Retention Time | Area    | Area % | Height | Height % |
|----------------|---------|--------|--------|----------|
| 12.732         | 6423444 | 49.60  | 301396 | 52.46    |
| 14.058         | 6526947 | 50.40  | 273180 | 47.54    |

|               |          |        |        |        |
|---------------|----------|--------|--------|--------|
| <b>Totals</b> | 12950391 | 100.00 | 574576 | 100.00 |
|---------------|----------|--------|--------|--------|

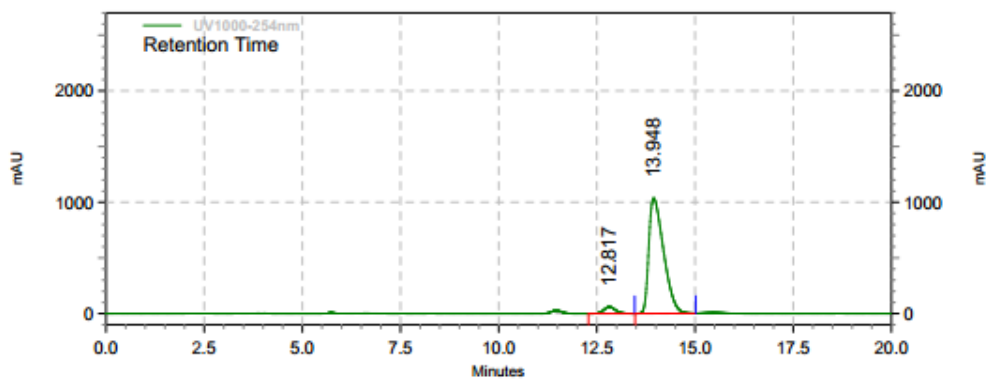

**UV1000-254nm  
Results**

| Retention Time | Area     | Area % | Height  | Height % |
|----------------|----------|--------|---------|----------|
| 12.817         | 1230299  | 4.35   | 60218   | 5.50     |
| 13.948         | 27077664 | 95.65  | 1035498 | 94.50    |

|               |          |        |         |        |
|---------------|----------|--------|---------|--------|
| <b>Totals</b> | 28307963 | 100.00 | 1095716 | 100.00 |
|---------------|----------|--------|---------|--------|

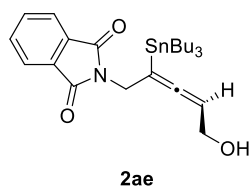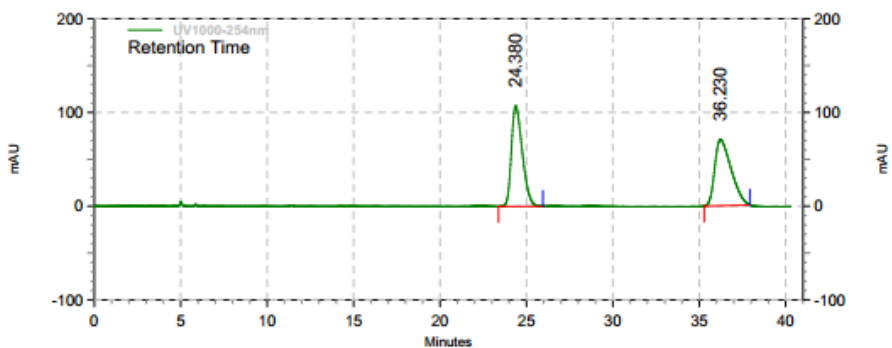

**UV1000-254nm  
Results**

| Retention Time | Area           | Area %        | Height        | Height %      |
|----------------|----------------|---------------|---------------|---------------|
| 24.380         | 4704299        | 50.28         | 107129        | 60.30         |
| 36.230         | 4651237        | 49.72         | 70529         | 39.70         |
| <b>Totals</b>  | <b>9355536</b> | <b>100.00</b> | <b>177658</b> | <b>100.00</b> |

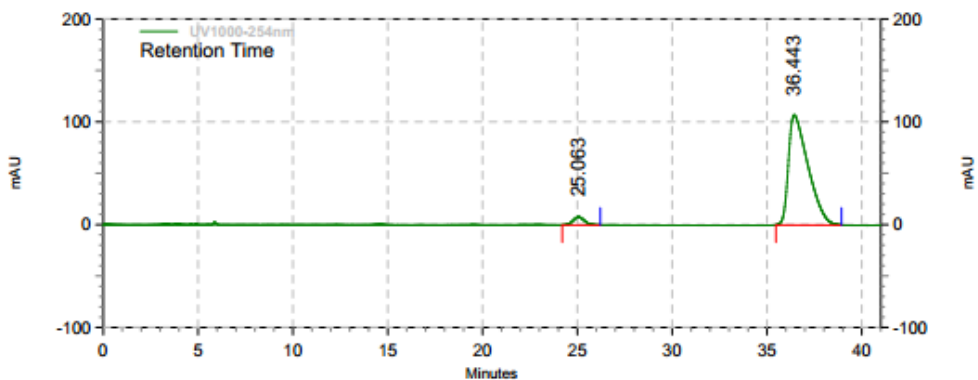

**UV1000-254nm  
Results**

| Retention Time | Area           | Area %        | Height        | Height %      |
|----------------|----------------|---------------|---------------|---------------|
| 25.063         | 324730         | 4.06          | 7832          | 6.82          |
| 36.443         | 7680507        | 95.94         | 106968        | 93.18         |
| <b>Totals</b>  | <b>8005237</b> | <b>100.00</b> | <b>114800</b> | <b>100.00</b> |

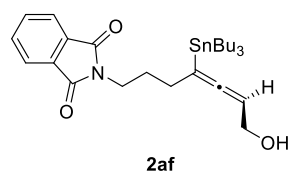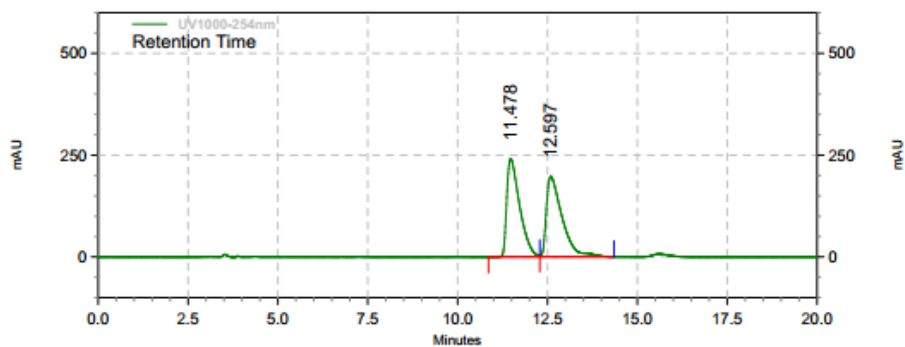

**UV1000-254nm**

**Results**

| Retention Time | Area    | Area % | Height | Height % |
|----------------|---------|--------|--------|----------|
| 11.478         | 5992610 | 49.99  | 240729 | 55.02    |
| 12.597         | 5994237 | 50.01  | 196832 | 44.98    |

|        |          |        |        |        |
|--------|----------|--------|--------|--------|
| Totals | 11986847 | 100.00 | 437561 | 100.00 |
|--------|----------|--------|--------|--------|

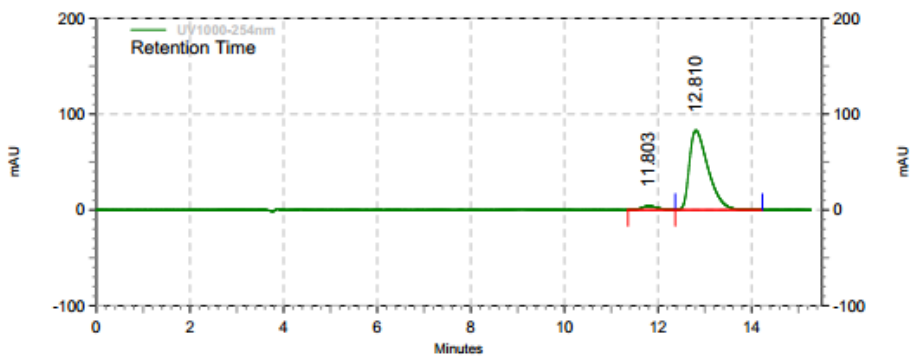

**UV1000-254nm**

**Results**

| Retention Time | Area    | Area % | Height | Height % |
|----------------|---------|--------|--------|----------|
| 11.803         | 92215   | 3.84   | 3920   | 4.51     |
| 12.810         | 2309293 | 96.16  | 83012  | 95.49    |

|        |         |        |       |        |
|--------|---------|--------|-------|--------|
| Totals | 2401508 | 100.00 | 86932 | 100.00 |
|--------|---------|--------|-------|--------|

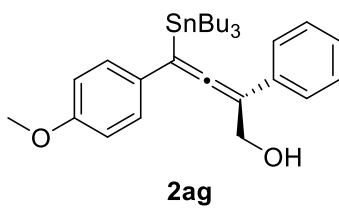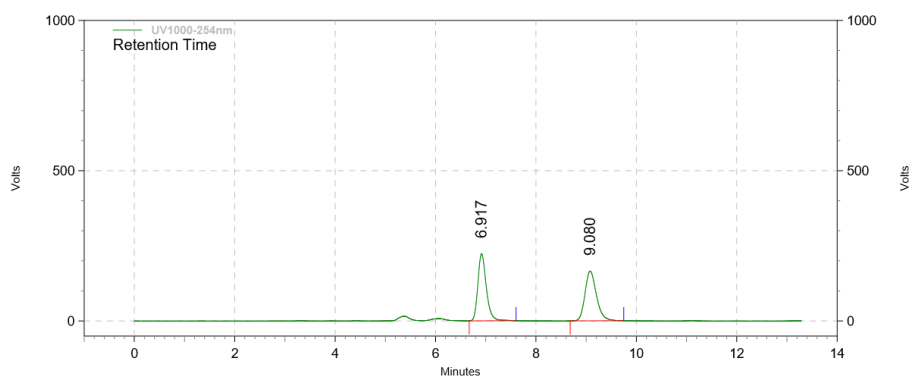

**UV1000-254nm  
Results**

| Retention Time | Area           | Area %        | Height        | Height %      |
|----------------|----------------|---------------|---------------|---------------|
| 6.917          | 2612069        | 49.93         | 223598        | 57.42         |
| 9.080          | 2619395        | 50.07         | 165794        | 42.58         |
| <b>Totals</b>  | <b>5231464</b> | <b>100.00</b> | <b>389392</b> | <b>100.00</b> |

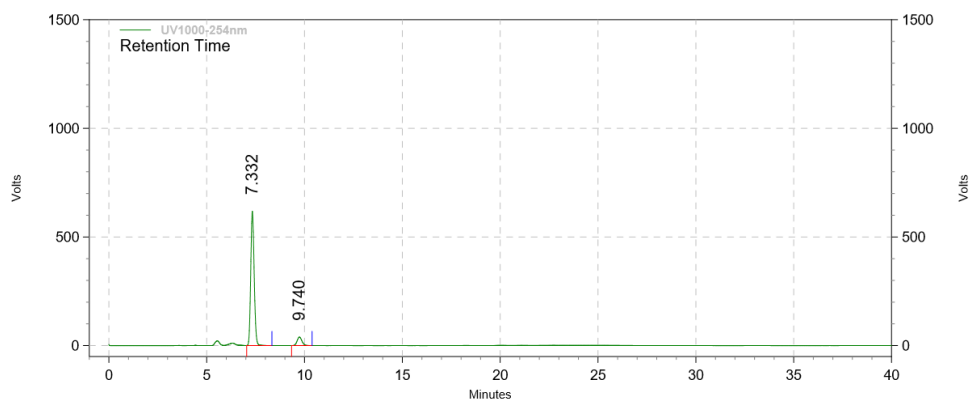

**UV1000-254nm  
Results**

| Retention Time | Area           | Area %        | Height        | Height %      |
|----------------|----------------|---------------|---------------|---------------|
| 7.332          | 7537754        | 91.81         | 618313        | 94.03         |
| 9.740          | 672393         | 8.19          | 39291         | 5.97          |
| <b>Totals</b>  | <b>8210147</b> | <b>100.00</b> | <b>657604</b> | <b>100.00</b> |

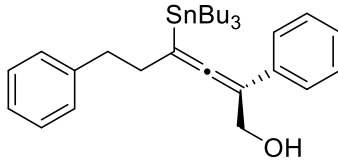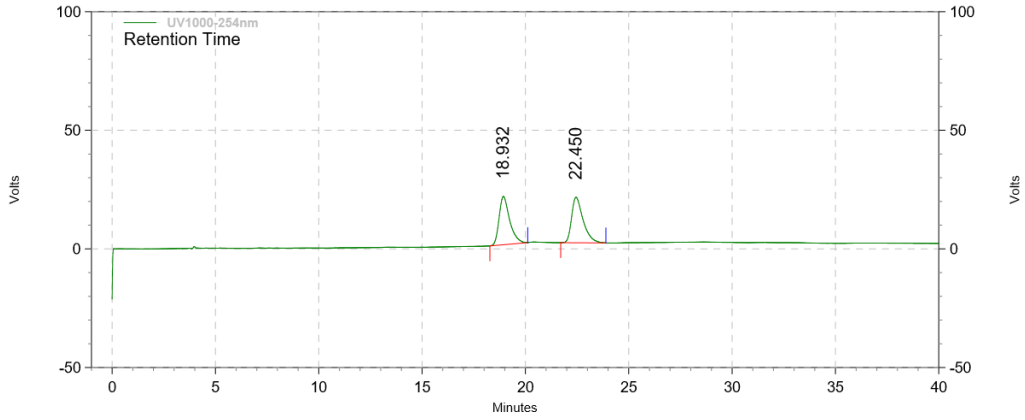

**UV1000-254nm  
Results**

| Retention Time | Area   | Area % | Height | Height % |
|----------------|--------|--------|--------|----------|
| 18.932         | 726575 | 49.48  | 20372  | 51.51    |
| 22.450         | 741870 | 50.52  | 19174  | 48.49    |

|        |         |        |       |        |
|--------|---------|--------|-------|--------|
| Totals | 1468445 | 100.00 | 39546 | 100.00 |
|--------|---------|--------|-------|--------|

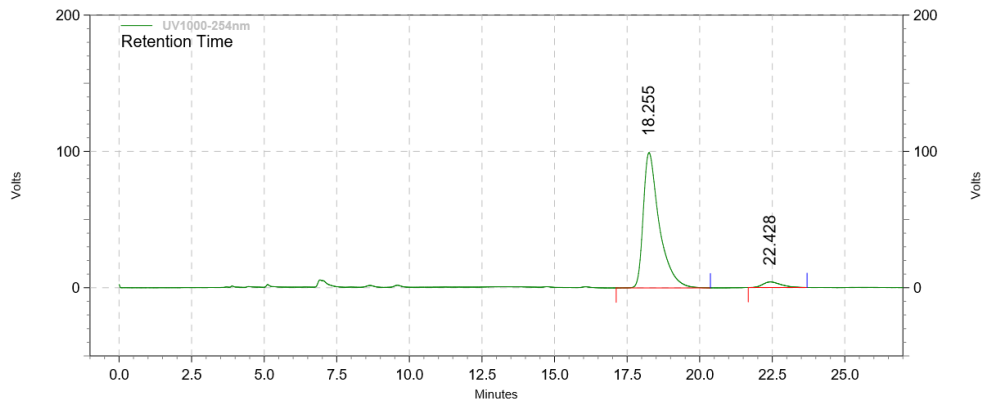

**UV1000-254nm  
Results**

| Retention Time | Area    | Area % | Height | Height % |
|----------------|---------|--------|--------|----------|
| 18.255         | 3801100 | 95.46  | 99227  | 96.03    |
| 22.428         | 180975  | 4.54   | 4104   | 3.97     |

|        |         |        |        |        |
|--------|---------|--------|--------|--------|
| Totals | 3982075 | 100.00 | 103331 | 100.00 |
|--------|---------|--------|--------|--------|

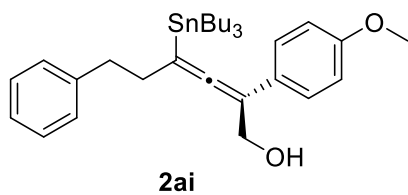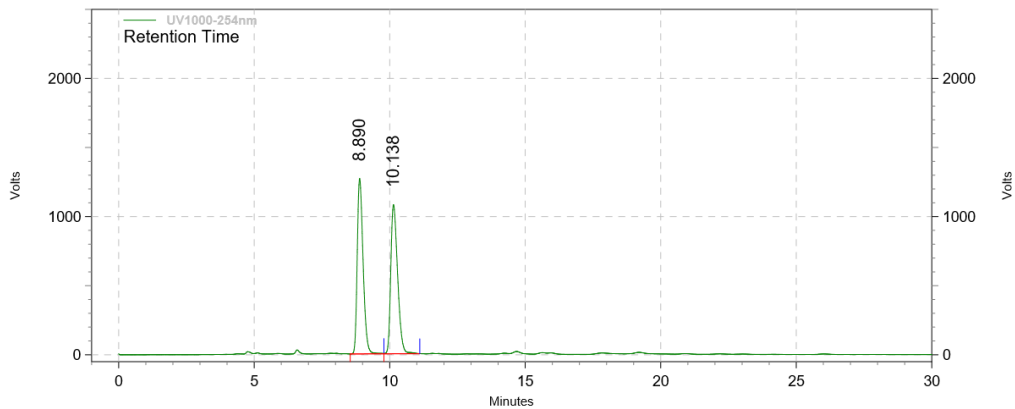

**UV1000-254nm  
Results**

| Retention Time | Area     | Area % | Height  | Height % |
|----------------|----------|--------|---------|----------|
| 8.890          | 19033021 | 50.16  | 1270003 | 54.05    |
| 10.138         | 18909384 | 49.84  | 1079744 | 45.95    |

| Totals | Area     | Area % | Height  | Height % |
|--------|----------|--------|---------|----------|
|        | 37942405 | 100.00 | 2349747 | 100.00   |

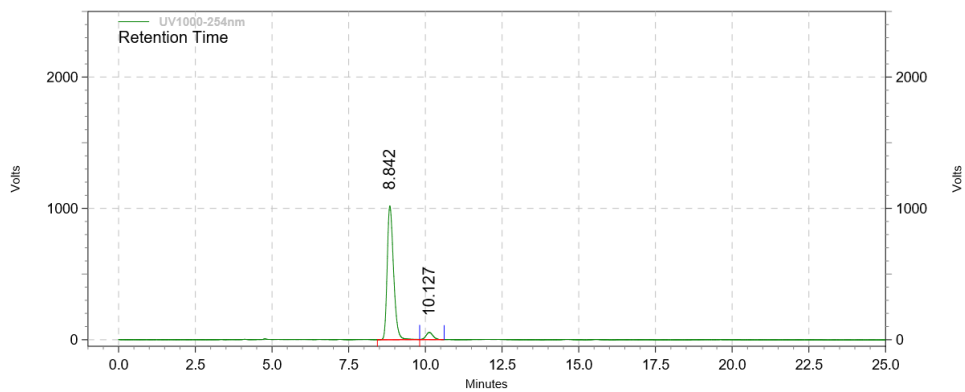

**UV1000-254nm  
Results**

| Retention Time | Area     | Area % | Height  | Height % |
|----------------|----------|--------|---------|----------|
| 8.842          | 14699364 | 94.31  | 1018496 | 94.86    |
| 10.127         | 886320   | 5.69   | 55166   | 5.14     |

| Totals | Area     | Area % | Height  | Height % |
|--------|----------|--------|---------|----------|
|        | 15585684 | 100.00 | 1073662 | 100.00   |

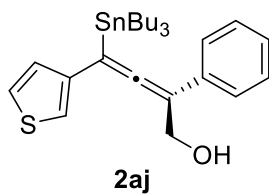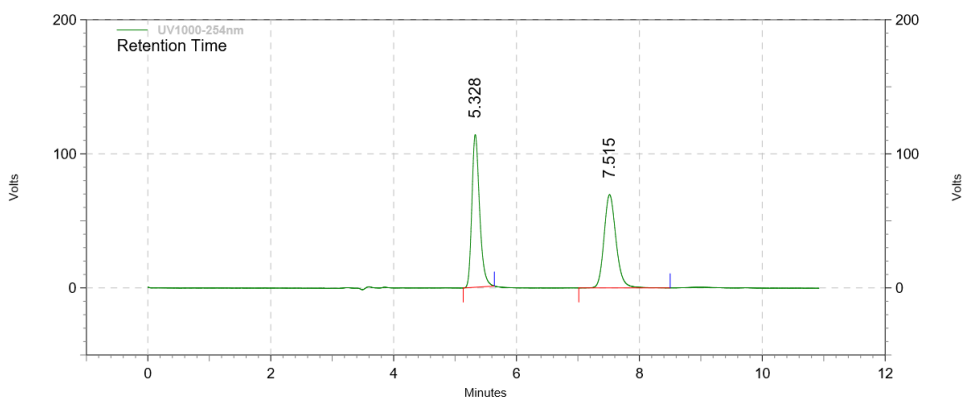

**UV1000-254nm  
Results**

| Retention Time | Area   | Area % | Height | Height % |
|----------------|--------|--------|--------|----------|
| 5.328          | 991252 | 51.28  | 113900 | 62.09    |
| 7.515          | 941865 | 48.72  | 69550  | 37.91    |

|        |         |        |        |        |
|--------|---------|--------|--------|--------|
| Totals | 1933117 | 100.00 | 183450 | 100.00 |
|--------|---------|--------|--------|--------|

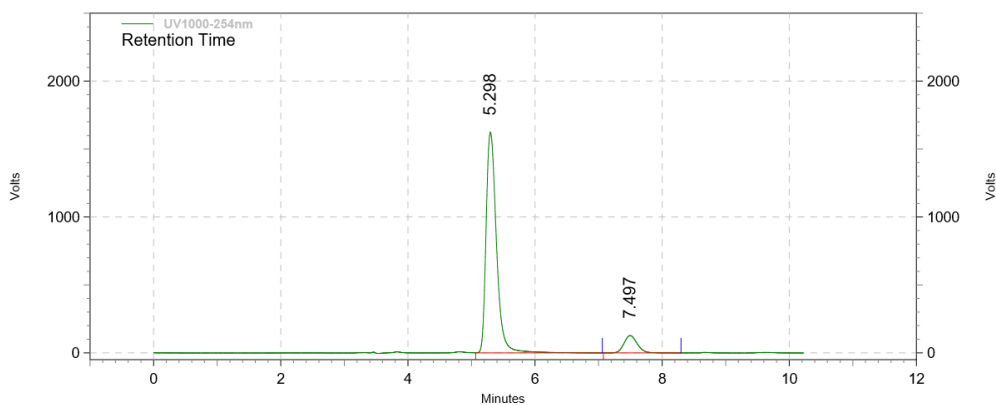

**UV1000-254nm  
Results**

| Retention Time | Area     | Area % | Height  | Height % |
|----------------|----------|--------|---------|----------|
| 5.298          | 18390385 | 90.94  | 1623431 | 92.72    |
| 7.497          | 1832770  | 9.06   | 127420  | 7.28     |

|        |          |        |         |        |
|--------|----------|--------|---------|--------|
| Totals | 20223155 | 100.00 | 1750851 | 100.00 |
|--------|----------|--------|---------|--------|



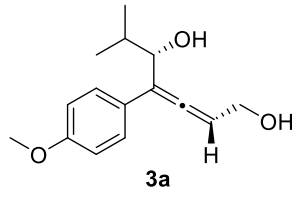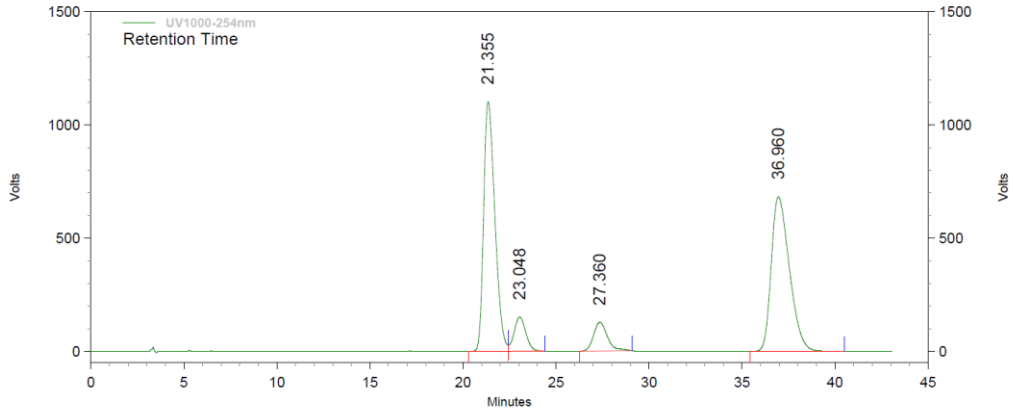

**UV1000-254nm  
Results**

| Retention Time | Area             | Area %        | Height         | Height %      |
|----------------|------------------|---------------|----------------|---------------|
| 21.355         | 46222430         | 43.73         | 1103210        | 53.44         |
| 23.048         | 6617047          | 6.26          | 151186         | 7.32          |
| 27.360         | 6594937          | 6.24          | 126932         | 6.15          |
| 36.960         | 46262220         | 43.77         | 682884         | 33.08         |
| <b>Totals</b>  | <b>105696634</b> | <b>100.00</b> | <b>2064212</b> | <b>100.00</b> |

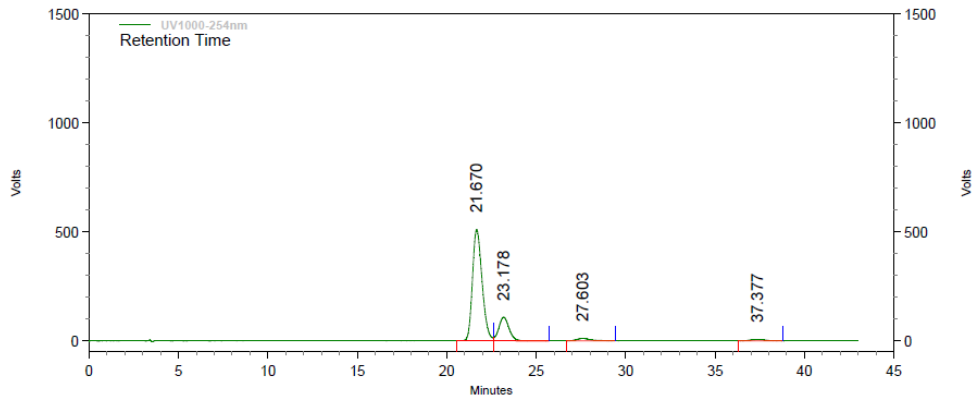

**UV1000-254nm  
Results**

| Retention Time | Area            | Area %        | Height        | Height %      |
|----------------|-----------------|---------------|---------------|---------------|
| 21.670         | 18975917        | 78.39         | 510025        | 80.33         |
| 23.178         | 4246404         | 17.54         | 107746        | 16.97         |
| 27.603         | 609883          | 2.52          | 10992         | 1.73          |
| 37.377         | 375258          | 1.55          | 6181          | 0.97          |
| <b>Totals</b>  | <b>24207462</b> | <b>100.00</b> | <b>634944</b> | <b>100.00</b> |

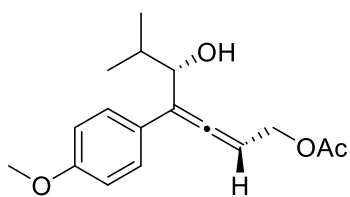

**4a**

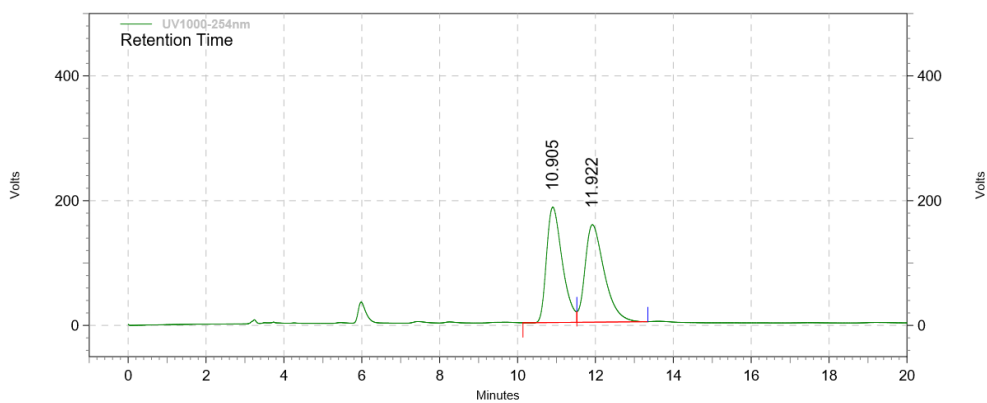

**UV1000-254nm  
Results**

| Retention Time | Area            | Area %        | Height        | Height %      |
|----------------|-----------------|---------------|---------------|---------------|
| 10.905         | 5199514         | 49.12         | 185008        | 54.21         |
| 11.922         | 5385943         | 50.88         | 156249        | 45.79         |
| <b>Totals</b>  | <b>10585457</b> | <b>100.00</b> | <b>341257</b> | <b>100.00</b> |

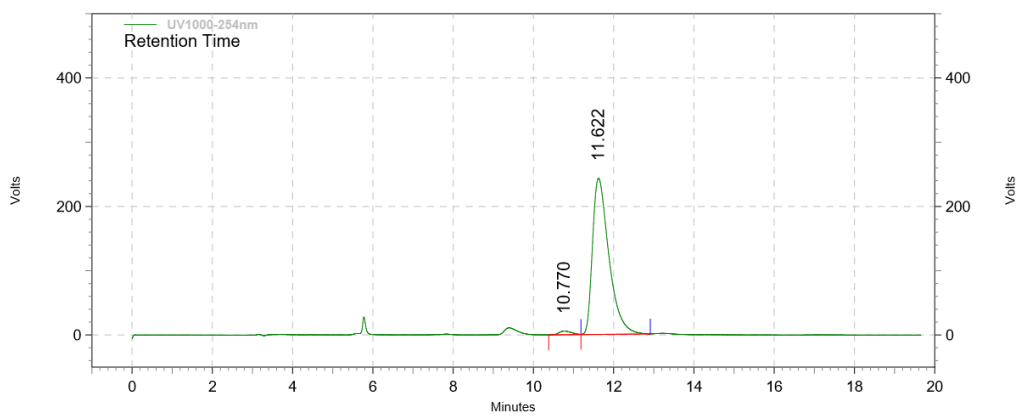

**UV1000-254nm  
Results**

| Retention Time | Area           | Area %        | Height        | Height %      |
|----------------|----------------|---------------|---------------|---------------|
| 10.770         | 123312         | 1.76          | 5788          | 2.33          |
| 11.622         | 6877369        | 98.24         | 243078        | 97.67         |
| <b>Totals</b>  | <b>7000681</b> | <b>100.00</b> | <b>248866</b> | <b>100.00</b> |

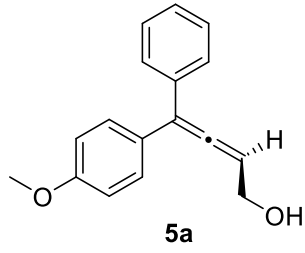

Data File: D:\HPLC\yj\race\stille\race 20201121  
 Method: C:\EZChrom Elite\Enterprise\Projects\Default\Method\zyl-BN.met  
 Acquired: 2020-11-21 上午 09:18:24  
 Printed: 2020-11-25 14:15:55

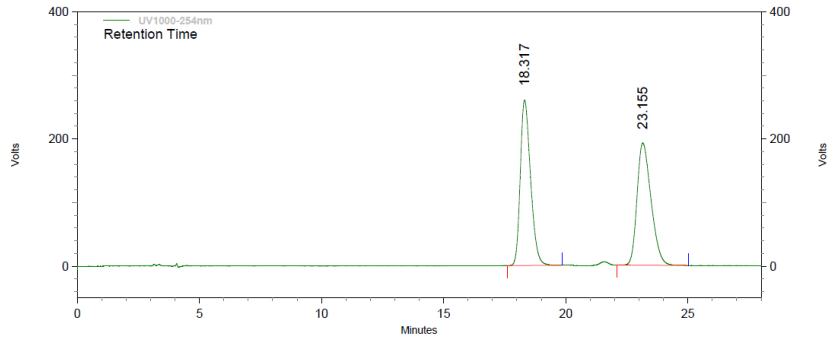

**UV1000-254nm**

**Results**

| Retention Time | Area    | Area %   | Height | Height % |        |
|----------------|---------|----------|--------|----------|--------|
| 18.317         | 7631697 | 49.91    | 260229 | 57.52    |        |
| 23.155         | 7659184 | 50.09    | 192185 | 42.48    |        |
| Totals         |         | 15290881 | 100.00 | 452414   | 100.00 |

Data File: D:\HPLC\yj\race\stille\cu sop 20201121  
 Method: C:\EZChrom Elite\Enterprise\Projects\Default\Method\zyl-BN.met  
 Acquired: 2020-11-21 上午 09:50:08  
 Printed: 2020-11-25 14:17:47

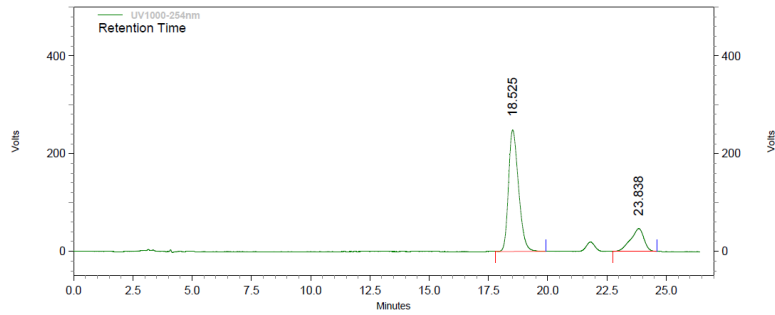

**UV1000-254nm**

**Results**

| Retention Time | Area    | Area %  | Height | Height % |        |
|----------------|---------|---------|--------|----------|--------|
| 18.525         | 7312734 | 79.87   | 248700 | 84.17    |        |
| 23.838         | 1843128 | 20.13   | 46757  | 15.83    |        |
| Totals         |         | 9155862 | 100.00 | 295457   | 100.00 |
